# Supplementary material
Source: PubMed Central journal article supplement (PMC7469393)
Supplement: ao0c02187_si_001.pdf [file ao0c02187_si_001.pdf]

## The binding of 2-(triazolylthio)acetamides to metallo- $\beta$ -lactamase CcrA determined with NMR

Hanna Andersson<sup>a</sup>, Patrik Jarvoll<sup>b,†</sup>, Shao-Kang Yang<sup>c</sup>, Ke-Wu Yang<sup>b,c</sup>, Máté Erdélyi<sup>a,b,\*</sup>

<sup>a</sup>Department of Chemistry - BMC, Uppsala University, Box 576, SE-751 23 Uppsala, Sweden

<sup>b</sup>Centre for Antibiotic Resistance Research (CARE) at the University of Gothenburg, Box 440, SE-405 30 Gothenburg, Sweden

<sup>c</sup>Key Laboratory of Synthetic and Natural Functional Molecule Chemistry of Ministry of Education, College of Chemistry and Materials Science, Northwest University, Xi'an 710127, P. R. China

### Contents

|       |                                                                                      |     |
|-------|--------------------------------------------------------------------------------------|-----|
| 1     | CcrA .....                                                                           | S2  |
| 1.1   | Primary structure .....                                                              | S2  |
| 2     | NMR spectroscopy .....                                                               | S3  |
| 2.1   | CcrA NMR resonance assignment .....                                                  | S3  |
| 2.2   | <sup>1</sup> H, <sup>15</sup> N HSQC titration experiments .....                     | S4  |
| 2.2.1 | <sup>1</sup> H, <sup>15</sup> N HSQC titration experiments of 6 .....                | S5  |
| 2.2.2 | Direction of chemical shift perturbation (DCSP) analysis .....                       | S37 |
| 3     | Molecular docking .....                                                              | S41 |
| 3.1   | General information .....                                                            | S41 |
| 3.2   | Verification of the docking method .....                                             | S41 |
| 3.2.1 | Redocking of the native ligand .....                                                 | S41 |
| 3.3   | Molecular docking, MM-GBSA rescoring and SIFt based clustering of 4–6 .....          | S44 |
| 3.4   | Prediction of aqueous pK <sub>a</sub> values for 1–10 .....                          | S52 |
| 3.5   | Molecular docking, MM-GBSA rescoring and SIFt based clustering of 1–3 and 7–10 ..... | S52 |
| 4     | References .....                                                                     | S68 |

<sup>†</sup> Present address: Karolinska Experimental Research and Imaging Center, Karolinska University Hospital Solna, SE-171 76 Stockholm, Sweden

\* Corresponding author. *E-mail address*: mate.erdelyi@kemi.uu.se (M. Erdélyi)

# 1 CcrA

## 1.1 Primary structure

There is a four amino acid residue difference between the sequence used in the NMR experiments, as compared to the sequence used in the docking studies (PDB ID: 1A8T) (Table S1).<sup>2</sup> Thus, there is a 98% sequence and 100% length similarity between the sequences. Amino acid residues 171 and 208 are located in the active site at loop 10 and loop 12, respectively. Here, this region is denominated the L10-L12 binding site. The difference in hydrogen bonding properties between the side chains of Ala and Thr at position 171 has been taken into consideration. No hydrogen bonding interactions were observed between the top scoring poses and the side chain of Thr171. For the most important residues, the BBL numbering is given in Table S4–Table S7.<sup>3</sup>

**Table S1.** The amino acid sequence expressed and used in the NMR experiments, as compare to the sequence used in the molecular docking.

| Residue number | Amino acid residue |                   |
|----------------|--------------------|-------------------|
|                | NMR experiments    | Crystal structure |
| 81             | <b>D</b>           | N                 |
| 88             | <b>L</b>           | I                 |
| 171            | <b>A</b>           | T                 |
| 208            | <b>D</b>           | N                 |

  

| Amino acid sequence                                                                                                                                                                                                                                                                                                                                                                                                                                                                                                                                                                                                                                                                                                                                           |
|---------------------------------------------------------------------------------------------------------------------------------------------------------------------------------------------------------------------------------------------------------------------------------------------------------------------------------------------------------------------------------------------------------------------------------------------------------------------------------------------------------------------------------------------------------------------------------------------------------------------------------------------------------------------------------------------------------------------------------------------------------------|
| A <sup>1</sup> QKSVKISDD <sup>10</sup> ISITQLSDKV <sup>20</sup> YTYVSLAEIE <sup>30</sup><br>GWGMVPSNGM <sup>40</sup> IVINNHQAAL <sup>50</sup> LDTPINDAQ<br>T <sup>60</sup> EMLVNWVTDS <sup>70</sup> LHAKVTTFIP <sup>80</sup> <b>D</b> <sup>81</sup> HWHGD<br>CL <sup>88</sup> GG <sup>90</sup> LGYLQRKGVQ <sup>100</sup> SYANQMTIDL <sup>110</sup> AK<br>EKGLPVPE <sup>120</sup> HGFTDSLTVS <sup>130</sup> LDGMPLQCY <sup>140</sup><br>LGGGHATDNI <sup>150</sup> VVWLPTENIL <sup>160</sup> FGGCMLKDN<br>Q <sup>170</sup> <b>A</b> <sup>171</sup> TSIGNISDA <sup>180</sup> DVTAWPKTLD <sup>190</sup> KVKAK<br>FPSAR <sup>200</sup> YVVPGHG <b>D</b> <sup>208</sup> YG <sup>210</sup> GTELIEHTKQ <sup>220</sup> IV<br>NQYIESTS <sup>230</sup> KP <sup>232</sup> |

## 2 NMR spectroscopy

### 2.1 CcrA NMR resonance assignment

**Table S2.**  $^{13}\text{C}^\alpha$  and  $^{13}\text{C}^\beta$  chemical shift resonance assignments of CcrA.

| CcrA<br>residue | $\delta$ (ppm)         |                       |
|-----------------|------------------------|-----------------------|-----------------|------------------------|-----------------------|-----------------|------------------------|-----------------------|-----------------|------------------------|-----------------------|-----------------|------------------------|-----------------------|
|                 | $^{13}\text{C}^\alpha$ | $^{13}\text{C}^\beta$ |
| Ala1            |                        |                       | Leu51           | 54.56                  | 39.45                 | Ser101          | 67.60                  | 67.60                 | Val151          | 60.26                  | 34.92                 | Tyr201          | 56.07                  | 42.58                 |
| Gln2            | 55.91                  |                       | Asp52           | 58.52                  | 40.66                 | Tyr102          | 55.94                  | 42.29                 | Val152          | 61.73                  | 42.53                 | Val202          | 61.30                  | 33.25                 |
| Lys3            | 56.91                  | 33.50                 | Thr53           | 59.70                  | 68.88                 | Ala103          | 50.65                  | 24.18                 | Trp153          | 53.93                  | 35.43                 | Val203          | 58.75                  | 34.16                 |
| Ser4            | 57.68                  | 65.17                 | Pro54           | 62.41                  | 39.82                 | Asn104          | 52.18                  | 36.57                 | Leu154          | 50.98                  | 40.72                 | Pro204          | 61.73                  | 33.39                 |
| Val5            | 61.08                  | 35.03                 | Ile55           | 61.71                  | 34.88                 | Gln105          | 58.36                  | 28.11                 | Pro155          |                        | 32.54                 | Gly205          | 47.95                  |                       |
| Lys6            | 56.34                  | 32.50                 | Asn56           | 50.86                  | 41.46                 | Met106          | 58.49                  | 35.21                 | Thr156          | 64.26                  | 67.98                 | His206          | 55.75                  | 31.34                 |
| Ile7            | 62.58                  | 38.37                 | Asp57           | 57.81                  | 41.32                 | Thr107          | 65.86                  | 67.78                 | Glu157          | 54.00                  | 32.00                 | Gly207          | 43.85                  |                       |
| Ser8            | 56.75                  | 65.04                 | Ala58           | 55.80                  | 18.03                 | Ile108          | 66.79                  | 37.96                 | Asn158          | 55.19                  | 37.56                 | Asp208          | 55.56                  | 41.37                 |
| Asp9            | 57.58                  | 40.51                 | Gln59           | 59.06                  | 30.16                 | Asp109          | 57.79                  | 39.80                 | Ile159          | 60.88                  | 42.76                 | Tyr209          | 56.27                  | 39.91                 |
| Asp10           | 53.65                  | 42.51                 | Thr60           | 68.49                  | 66.97                 | Leu110          | 58.10                  | 41.83                 | Leu160          | 52.83                  | 47.25                 | Gly210          | 46.46                  |                       |
| Ile11           | 61.17                  | 41.22                 | Glu61           | 59.57                  | 28.76                 | Ala111          | 55.94                  | 17.53                 | Phe161          | 55.55                  | 38.45                 | Gly211          | 44.85                  |                       |
| Ser12           | 56.79                  | 66.54                 | Met62           | 59.00                  | 32.52                 | Lys112          | 59.53                  | 32.76                 | Gly162          | 44.73                  |                       | Thr212          | 65.27                  | 68.78                 |
| Ile13           | 60.13                  | 41.83                 | Leu63           | 58.25                  | 43.21                 | Glu113          | 59.02                  | 29.90                 | Gly163          | 46.27                  |                       | Glu213          | 59.49                  | 26.82                 |
| Thr14           | 62.19                  | 71.68                 | Val64           | 67.55                  | 31.14                 | Lys114          | 56.04                  | 33.90                 | Cys164          | 62.59                  | 27.66                 | Leu214          | 59.10                  | 42.30                 |
| Gln15           | 56.94                  | 29.45                 | Asn65           | 55.92                  | 37.37                 | Gly115          | 46.65                  |                       | Met165          | 57.88                  | 33.18                 | Ile215          | 66.30                  | 37.80                 |
| Leu16           | 55.53                  | 43.37                 | Trp66           | 62.78                  | 28.41                 | Leu116          | 52.91                  | 41.25                 | Leu166          | 52.79                  | 43.73                 | Glu216          | 59.12                  | 29.41                 |
| Ser17           | 56.61                  | 65.97                 | Val67           | 67.13                  | 31.55                 | Pro117          |                        |                       | Lys167          | 55.59                  | 33.73                 | His217          | 59.69                  | 30.32                 |
| Asp18           | 57.99                  | 40.74                 | Thr68           | 66.10                  | 69.47                 | Val118          |                        |                       | Asp168          | 52.88                  | 42.34                 | Thr218          | 68.38                  | 63.72                 |
| Lys19           | 56.29                  | 35.61                 | Asp69           | 56.97                  | 41.42                 | Pro119          |                        |                       | Asn169          | 55.50                  | 39.00                 | Lys219          | 60.73                  | 32.06                 |
| Val20           | 61.94                  | 34.27                 | Ser70           | 60.35                  | 63.19                 | Glu120          | 59.52                  |                       | Gln170          | 55.64                  | 29.40                 | Gln220          | 59.32                  | 27.75                 |
| Tyr21           | 55.80                  | 41.69                 | Leu71           | 53.91                  | 40.42                 | His121          | 55.19                  | 32.26                 | Ala171          | 53.47                  | 20.17                 | Ile221          | 64.50                  | 37.78                 |
| Thr22           | 59.22                  | 71.23                 | His72           | 55.70                  | 26.36                 | Gly122          | 44.47                  |                       | Thr172          | 61.05                  |                       | Val222          | 66.65                  | 31.35                 |
| Tyr23           | 55.23                  | 43.10                 | Ala73           | 49.78                  | 22.49                 | Phe123          | 55.86                  | 43.11                 | Ser173          | 56.36                  | 65.75                 | Asn223          | 56.09                  | 37.67                 |
| Val24           | 60.87                  | 34.69                 | Lys74           | 54.22                  | 34.74                 | Thr124          | 61.77                  | 70.20                 | Ile174          | 63.61                  | 40.15                 | Gln224          | 59.17                  | 28.15                 |
| Ser25           | 55.69                  | 66.18                 | Val75           | 63.05                  | 30.91                 | Asp125          | 57.92                  |                       | Gly175          | 45.50                  |                       | Tyr225          | 62.10                  | 38.41                 |
| Leu26           | 54.60                  | 44.24                 | Thr76           | 61.55                  | 71.19                 | Ser126          | 57.18                  | 66.45                 | Asn176          | 54.13                  |                       | Ile226          | 65.88                  | 38.54                 |
| Ala27           | 51.75                  | 22.88                 | Thr77           | 63.58                  | 73.43                 | Leu127          | 55.07                  | 46.04                 | Ile177          | 60.44                  | 38.51                 | Glu227          | 59.31                  | 29.63                 |
| Glu28           | 56.26                  | 30.38                 | Phe78           | 56.43                  | 43.60                 | Thr128          | 62.15                  | 69.37                 | Ser178          | 62.60                  | 63.17                 | Ser228          | 60.71                  | 63.69                 |
| Ile29           | 60.25                  | 39.44                 | Ile79           | 57.81                  | 44.73                 | Val129          | 60.87                  | 33.42                 | Asp179          | 53.79                  | 43.68                 | Thr229          | 62.50                  | 70.08                 |
| Glu30           | 59.04                  | 29.40                 | Pro80           |                        |                       | Ser130          | 56.00                  | 64.14                 | Ala180          | 52.12                  | 21.55                 | Ser230          | 58.89                  | 64.03                 |
| Gly31           | 45.39                  |                       | Asp81           | 58.61                  |                       | Leu131          | 52.48                  | 42.38                 | Asp181          | 51.85                  | 41.20                 | Lys231          | 54.13                  | 32.67                 |
| Trp32           | 57.40                  | 31.64                 | His82           | 56.73                  | 27.38                 | Asp132          | 54.99                  | 41.27                 | Val182          | 67.50                  | 31.86                 | Pro232          |                        |                       |
| Gly33           | 44.89                  |                       | Trp83           | 58.76                  | 28.73                 | Gly133          | 44.88                  |                       | Thr183          | 65.28                  | 68.70                 |                 |                        |                       |
| Met34           | 54.90                  | 31.28                 | His84           | 54.56                  | 33.20                 | Met134          | 52.53                  | 33.87                 | Ala184          | 53.68                  | 19.88                 |                 |                        |                       |
| Val35           | 59.41                  | 35.67                 | Gly85           | 48.17                  |                       | Pro135          | 63.15                  | 32.79                 | Trp185          | 60.75                  | 28.59                 |                 |                        |                       |
| Pro36           | 62.01                  | 31.83                 | Asp86           | 53.94                  | 37.15                 | Leu136          | 55.05                  | 41.94                 | Pro186          | 67.21                  |                       |                 |                        |                       |
| Ser37           | 59.37                  | 65.66                 | Cys87           | 59.33                  | 31.82                 | Gln137          | 55.74                  | 30.50                 | Lys187          | 58.93                  | 31.67                 |                 |                        |                       |
| Asn38           | 51.19                  | 41.14                 | Leu88           | 61.41                  | 42.09                 | Cys138          | 57.02                  | 30.33                 | Thr188          | 66.46                  | 68.25                 |                 |                        |                       |
| Gly39           | 45.51                  |                       | Gly89           | 48.02                  |                       | Tyr139          | 58.03                  | 42.91                 | Leu189          | 58.40                  | 39.79                 |                 |                        |                       |
| Met40           | 53.88                  | 36.69                 | Gly90           | 44.07                  |                       | Tyr140          | 58.03                  | 39.05                 | Asp190          | 57.75                  | 39.97                 |                 |                        |                       |
| Ile41           | 60.52                  | 42.08                 | Leu91           | 57.30                  | 41.97                 | Leu141          | 53.65                  | 43.18                 | Lys191          | 59.95                  | 33.01                 |                 |                        |                       |
| Val42           | 60.46                  | 34.65                 | Gly92           | 47.29                  |                       | Gly142          | 43.60                  |                       | Val192          | 66.75                  | 31.91                 |                 |                        |                       |
| Ile43           | 59.19                  | 40.92                 | Tyr93           | 61.84                  | 38.07                 | Gly143          | 45.15                  |                       | Lys193          | 58.85                  | 32.95                 |                 |                        |                       |
| Asn44           | 53.79                  | 42.50                 | Leu94           | 57.31                  | 40.48                 | Gly144          | 46.81                  |                       | Ala194          | 53.69                  | 18.82                 |                 |                        |                       |
| Asn45           | 54.21                  | 36.62                 | Gln95           | 59.50                  | 27.62                 | His145          | 58.27                  | 28.18                 | Lys195          | 57.43                  | 32.38                 |                 |                        |                       |
| His46           | 58.47                  | 27.29                 | Arg96           | 59.09                  | 29.87                 | Ala146          | 49.26                  | 23.25                 | Phe196          | 53.41                  | 38.17                 |                 |                        |                       |
| Gln47           | 55.13                  | 31.95                 | Lys97           | 54.38                  | 31.56                 | Thr147          | 65.74                  | 68.31                 | Pro197          | 64.94                  |                       |                 |                        |                       |
| Ala48           | 49.28                  | 23.56                 | Gly98           | 46.06                  |                       | Asp148          | 53.24                  | 40.98                 | Ser198          | 57.96                  | 64.08                 |                 |                        |                       |
| Ala49           | 48.93                  | 22.45                 | Val99           | 63.16                  | 32.50                 | Asn149          | 54.17                  | 41.07                 | Ala199          | 53.96                  | 19.06                 |                 |                        |                       |
| Leu50           | 53.50                  | 45.64                 | Gln100          | 55.92                  | 30.67                 | Ile150          | 60.20                  | 42.54                 | Arg200          | 57.43                  | 31.39                 |                 |                        |                       |

## 2.2 $^1\text{H}$ , $^{15}\text{N}$ HSQC titration experiments

For the titrations, separate CcrA batches were prepared and the ligands were dissolved in the same buffer as the protein (10 mM PBS, 1.0 mM  $\text{ZnSO}_4$ , pH 7.0). Correlation  $^1\text{H}$ ,  $^{15}\text{N}$  HSQC spectra were recorded on free  $^{15}\text{N}$ -labeled CcrA, and upon addition of **4**, **5** and **6** as reported in Table S3. To minimize sample dilution, the volumes of the standard ligand solutions that were added in each titration step were ensured to be kept in the low microliter range. Averaged protein concentrations were used in the calculations, and the actual ligand concentrations were adjusted for the small dilution in each step. The samples were vortexed to mix the ligand and protein properly. Care was taken to avoid any foaming.

For the  $^1\text{H}$ ,  $^{15}\text{N}$  HSQC experiments, normal sampling of 4 scans and 150 phase sensitive steps in the indirect dimension, and with a total acquisition time of about 30 min, were used. In some cases, 8 scans were required to increase the s/n ratio. The experiments were performed on either a 800 MHz spectrometer with a 3 mm TCI cryogenic probe or a 900 MHz spectrometer equipped with a 5 mm TCI cryogenic probe. A constant temperature of 35 °C was maintained throughout the experiments. High precision 3 mm NMR tubes were used at all times.

The NMR data was processed using the NMRPipe software. The CCPN software (V2) containing the CcpNmr Analysis plugin was used in the data analysis, which involve both automatic analysis and manual inspection of the trajectories of the shifting peaks.

**Table S3.** Concentrations of the CcrA, and **4**, **5** and **6**, respectively, which were used in the titration experiments.

| Compound                  |   | <b>4</b> | <b>5</b> | <b>6</b> |
|---------------------------|---|----------|----------|----------|
| CcrA                      |   | C (mM)   |          |          |
| Titration step            | 0 | 0        | 0        | 0        |
|                           | 1 | 0.031    | 0.029    | 0.050    |
|                           | 2 | 0.062    | 0.059    | 0.099    |
|                           | 3 | 0.124    | 0.088    | 0.148    |
|                           | 4 | 0.247    | 0.117    | 0.196    |
|                           | 5 | 0.495    | 0.145    |          |
|                           | 6 |          | 0.213    |          |
| Final ratio CcrA:compound |   | 1:2      | 1:1.4    | 1:1      |

The weighted average chemical shift perturbations (CSP) for the backbone amides were calculated from the observed chemical shift differences in the proton and nitrogen dimensions from equation 1, where the chemical shift scaling factor  $R_{\text{scale}}$  is 6.5.<sup>4-5</sup> The data is presented in Table S4–Table S6 and as histograms in Figure 3. If CSP data is missing there was no difference observed, or the analysis of the residue was prevented (i.e. it was overlapped, missing, or as in the case of prolyl residues, it was lacking a backbone amide proton). A CSP larger than the population mean ( $\mu$ ) plus one standard deviation ( $1\sigma$ ) is considered as a significant chemical shift perturbation (SCSP).<sup>5</sup> Assigned  $^1\text{H}$ ,  $^{15}\text{N}$  HSQC spectra are shown in Figure S2–Figure S11.

$$\text{Eqn. 1: } \text{CSP} = \Delta\delta(^1\text{H}, ^{15}\text{N}) = \sqrt{(\Delta\delta(^1\text{H}))^2 + ((1/R_{\text{scale}}) \times \Delta\delta(^{15}\text{N}))^2}$$

Dissociation constants ( $K_d$ ) and  $\Delta\delta_{\text{max}}$  were obtained by least square fitting of the observed chemical shift differences ( $\Delta\delta_{\text{obs}}$ ) and related total ligand concentrations ( $[\text{L}]_t$ ) to equation 2, where  $[\text{P}]_t$  corresponds to the total concentration of CcrA.<sup>5</sup> Fast exchange was observed for **4** and **5**, and slow exchange for **6** (described in 2.2.1). Thus,  $K_d$  values were only calculated for **4** and **5** using this method. In these calculation, the dissociation constants of the significantly shifted active site residues identified via the CSP and the direction of CSP analyses (described in 2.2.2) were included.

$$\text{Eqn. 2: } \Delta\delta_{\text{obs}} = \Delta\delta_{\text{max}}(([\text{P}]_t + [\text{L}]_t + K_d) - (([\text{P}]_t + [\text{L}]_t + K_d)^2 - 4[\text{P}]_t[\text{L}]_t)^{1/2})/2[\text{P}]_t$$

### 2.2.1 $^1\text{H}$ , $^{15}\text{N}$ HSQC titration experiments of **6**

The step-wise chemical shift changes observed in the titration series of **4** and **5** is characteristic for fast exchange processes (Figure S3, Figure S4, and Figure S6–Figure S9).<sup>5-6</sup> From the starting point, corresponding to the free form of CcrA, the  $^1\text{H}$  and  $^{15}\text{N}$  chemical shifts of the majority of the amino acid residues were changing gradually upon addition of the ligands. The chemical shifts at each titration point represent the average of the free and bound forms of CcrA. For **6**, on the other hand, the peaks of the free form were still observed in the first titration point, together with a new set of peaks representing the bound form (Figure S5, Figure S10 and Figure S11). This type of transitions between a decreasing free form and an increasing bound form, appearing as two separate peaks in the NMR spectra, is characteristic for slow exchange processes. The resonances of the bound form were assigned using the qualitative ‘minimum chemical shift approach’, in which the unassigned peak closest to the peak of the free form is identified and assigned to corresponding bound form.<sup>5, 7-8</sup> Also the disappearance of the peaks of the free form and the appearance of the peaks of the bound form in the spectra were inspected.

In Figure S1, a section of the full spectra is zoomed to show the free form, the individual titration steps, as well as the transition of the peaks during the titration series. In the first titration step there was a small peak of the free form left, but the main peak was already that belonging to the bound form (cf. Figure S1 a, b and f). In the following titration steps (c.f. Figure S1 c–e and g–i) the peaks of the bound form barely changed and approached a maxima. Due to the fast transition to the complexed state the data only represented the end-points, which prevented the extraction of dissociation constants using equation 2 (vide supra) and the peak integrals as the NMR observable.<sup>5-6, 9</sup> It is the curved region of the titration curve between the end-points that contain the required information on the equilibrium condition. As an alternative, an approximate  $K_d$  was derived from equation 3.<sup>9</sup> Based on the NMR data, saturation was assumed to be reached in the last titration step, and the bound fraction of CcrA ( $f_{\text{P}(\text{bound})}$ ) was determined from the peak intensity ratio between the first and the last titration steps.<sup>6</sup> The average  $K_d$  sample mean and standard deviation calculated using the data for the residues in the L3-L5-L7 binding site showing a significant CSP and a positive  $K_d$  value (i.e. Trp32, His82, Cys87, Gly89, His145 and Gly175) was  $2.3 \pm 0.3 \mu\text{M}$ .

$$\text{Eqn. 3: } K_d = [\text{P}] \times [\text{L}]/[\text{PL}] = (1 - f_{\text{P}(\text{bound})})/f_{\text{P}(\text{bound})} \times ([\text{L}]_t - f_{\text{P}(\text{bound})}[\text{P}]_t)$$

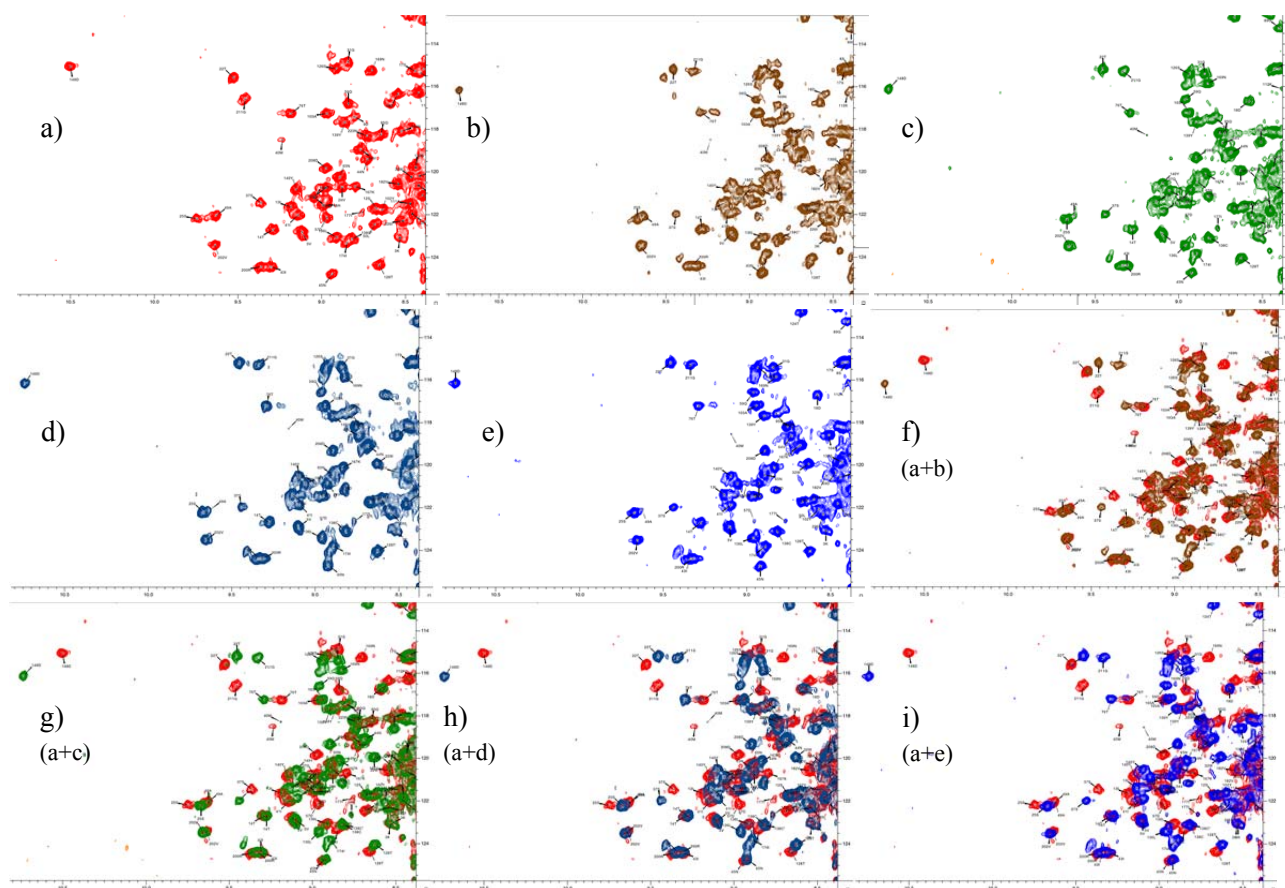

**Figure S1.** A zoomed region of the  $^1\text{H}$ ,  $^{15}\text{N}$  HSQC spectrum of a) free CcrA and b–e) CcrA bound to 6 in titration steps 1–4, respectively. f–i) Superpositions of a and b–e, respectively.



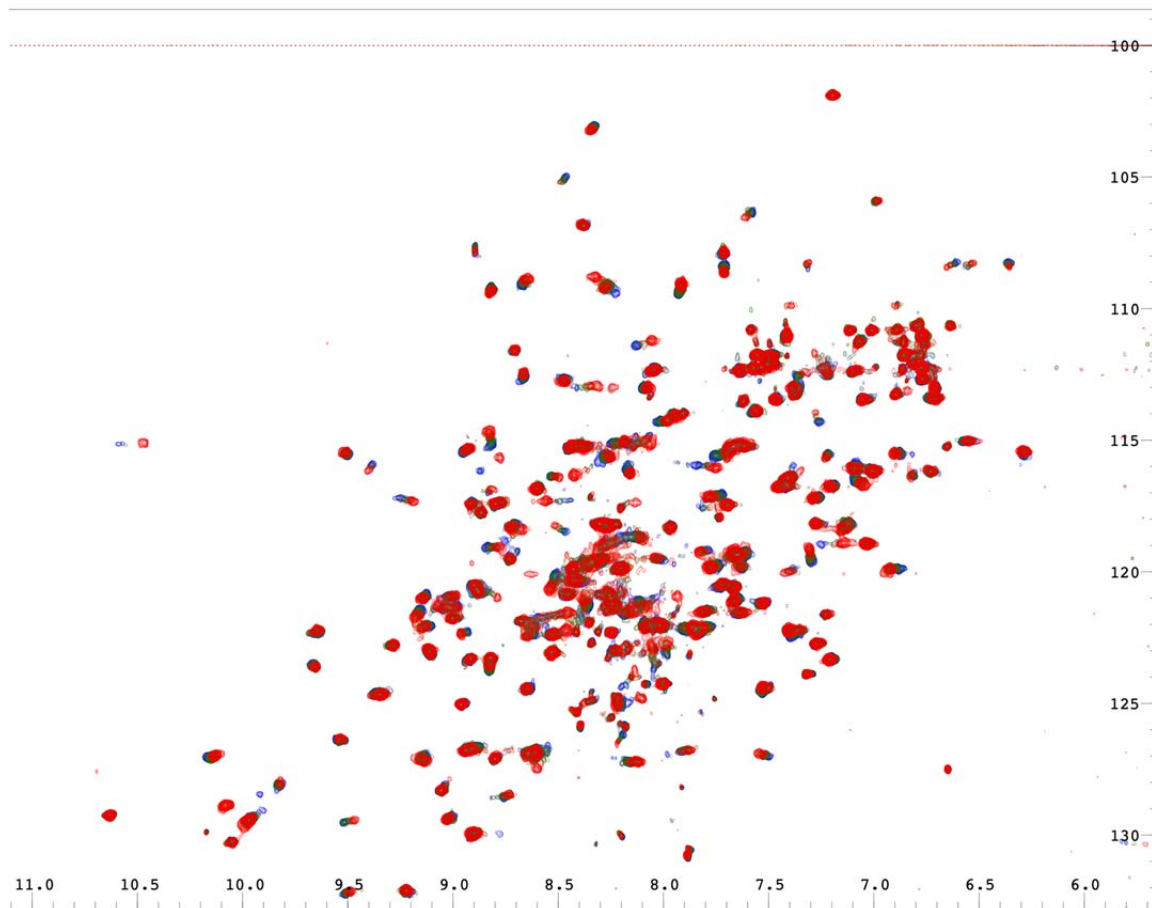

**Figure S4.** Superposition of the full  $^1\text{H}$ ,  $^{15}\text{N}$  HSQC spectrum of free CcrA (titration step 0 in red), and CcrA bound to **5** (titration steps 1–6, step 6 in blue).

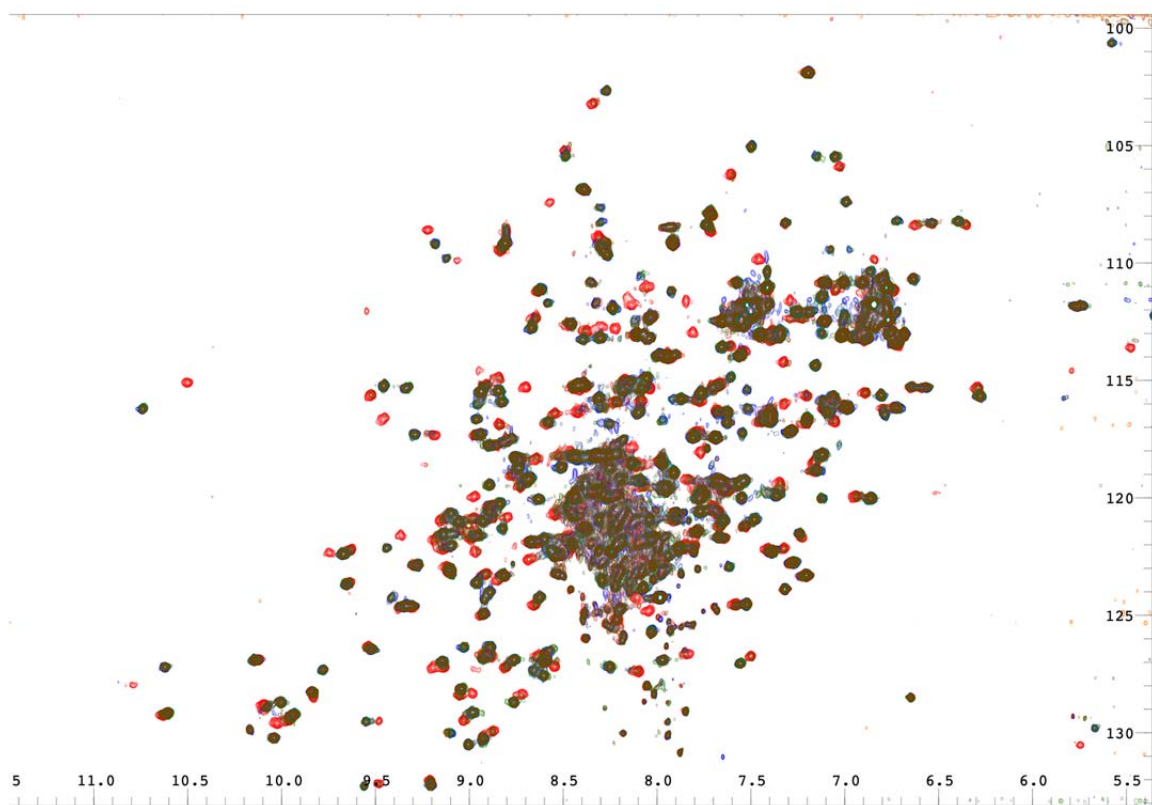

**Figure S5.** Superposition of the full  $^1\text{H}$ ,  $^{15}\text{N}$  HSQC spectrum of free CcrA (titration step 0 in red), and CcrA bound to **6** (titration steps 1–4, step 4 in blue).

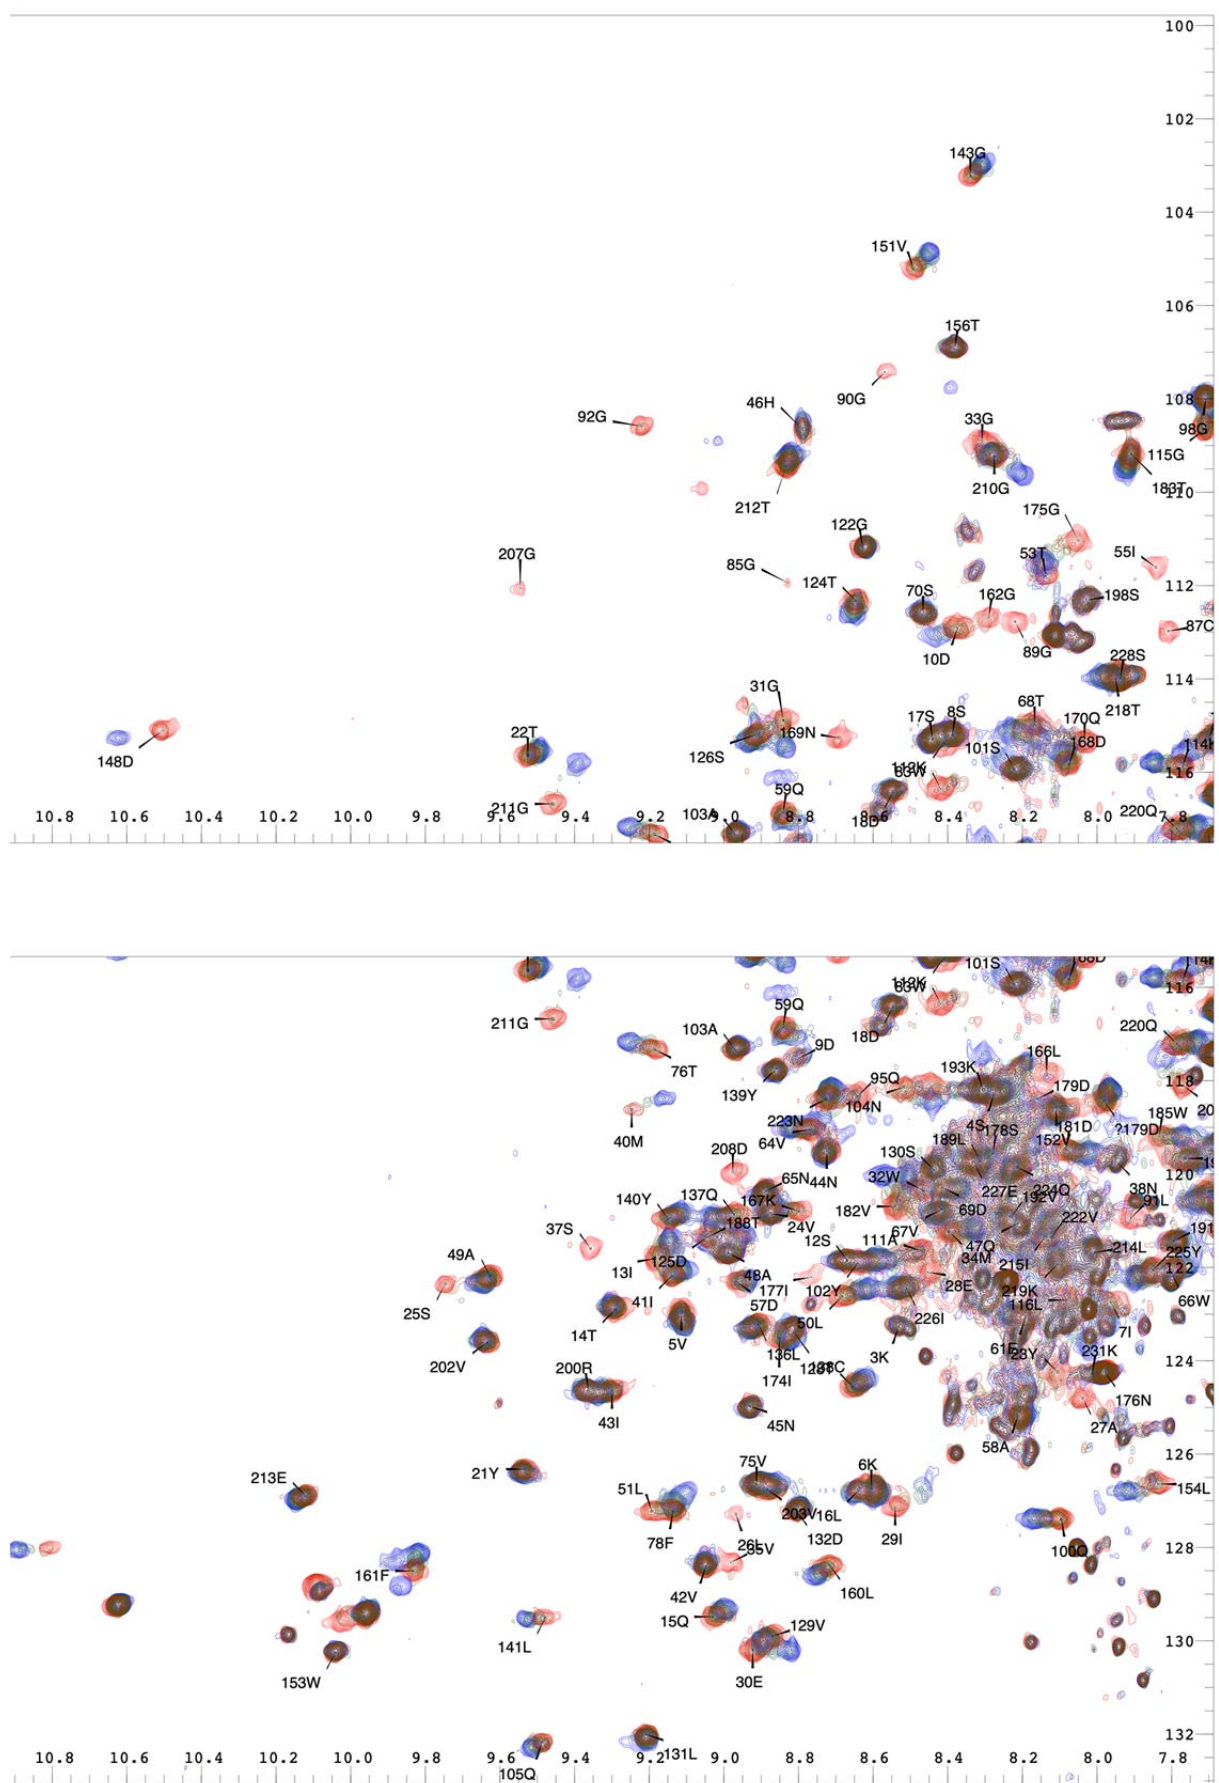

**Figure S6.** Superposition of zoomed regions of the  $^1\text{H}$ ,  $^{15}\text{N}$  HSQC spectrum ( $^1\text{H}$  10.7–8.1 ppm vs.  $^{15}\text{N}$  118–100 ppm and  $^{15}\text{N}$  133–115 ppm) of free CcrA (in red), and CcrA bound to **4** (steps 1–5, step 5 in blue).



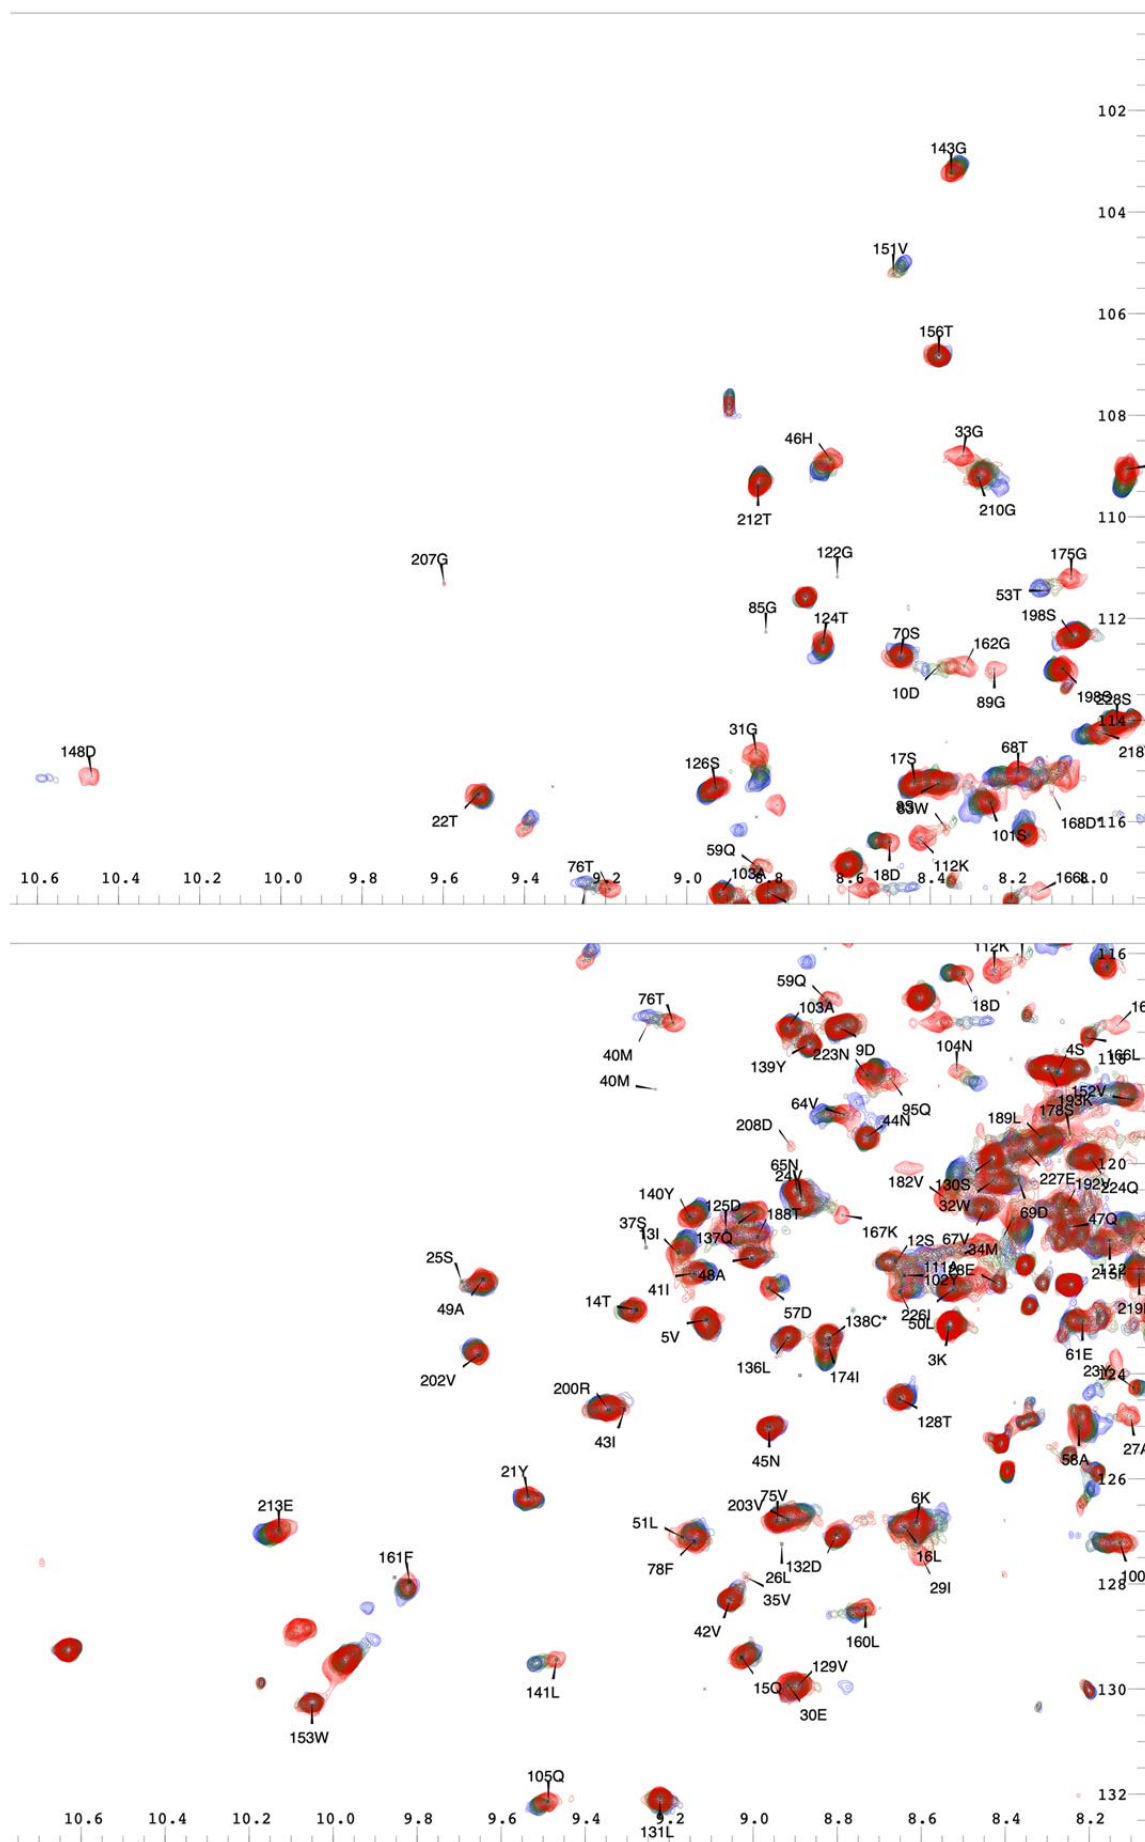

**Figure S8.** Superposition of zoomed regions of the  $^1\text{H}$ ,  $^{15}\text{N}$  HSQC spectrum ( $^1\text{H}$  10.9–7.7 ppm vs.  $^{15}\text{N}$  118–100 ppm and  $^{15}\text{N}$  133–115 ppm) of free CcrA (in red) and CcrA bound to **5** (titration steps 1–6, step 6 in blue).



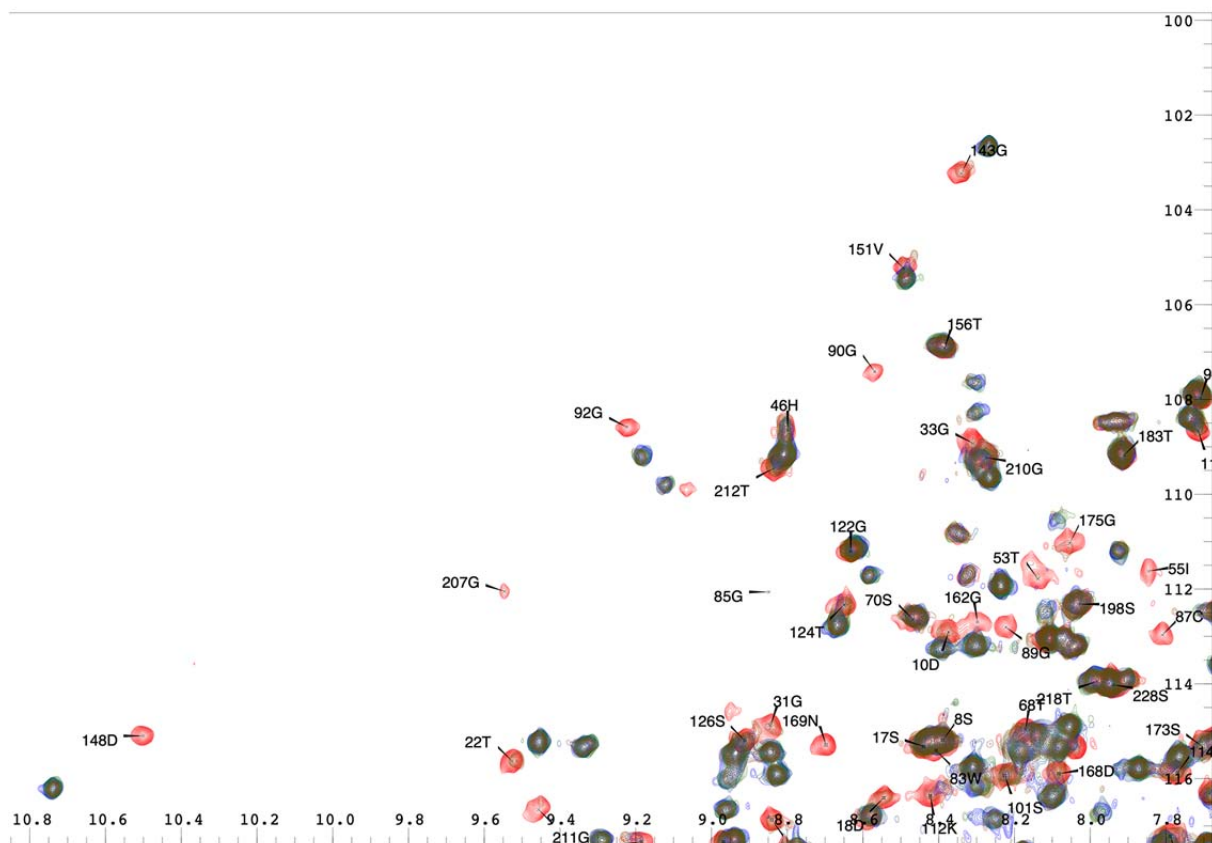

**Figure S10.** Superposition of zoomed regions of the  $^1\text{H}$ ,  $^{15}\text{N}$  HSQC spectrum ( $^1\text{H}$  10.8–7.7 ppm vs.  $^{15}\text{N}$  118–100 ppm and  $^{15}\text{N}$  133–115 ppm) of free CcrA (in red) and CcrA bound to **6** (titration steps 1–4, step 4 in blue).

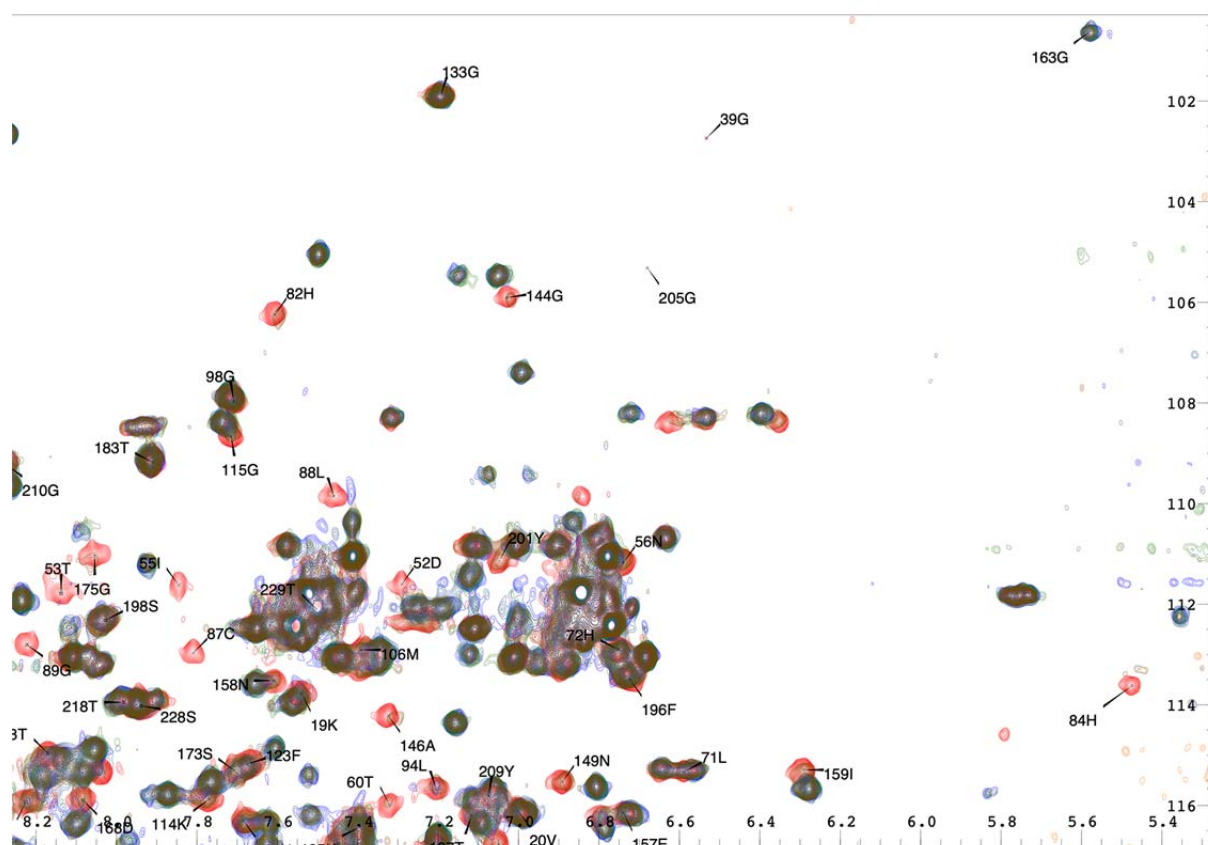

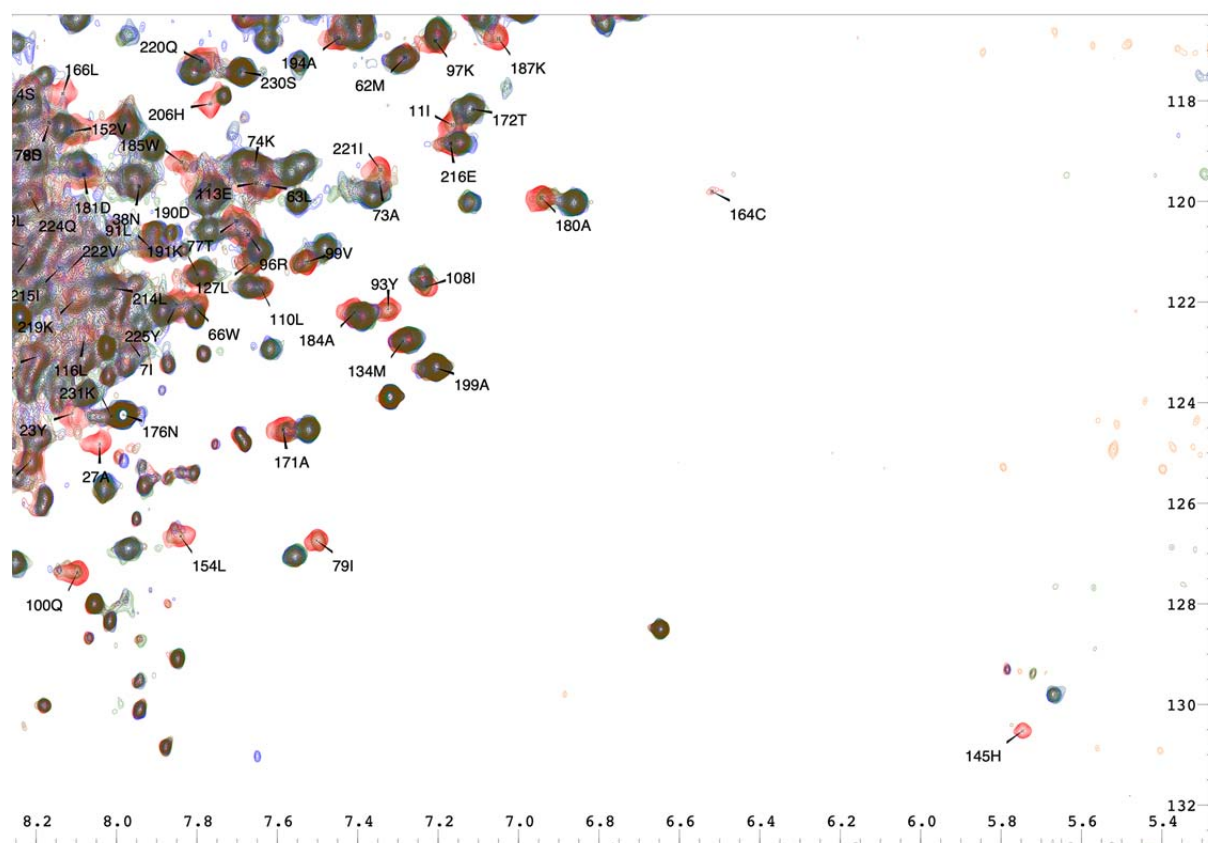

**Figure S11.** Superposition of zoomed regions of the  $^1\text{H}$ ,  $^{15}\text{N}$  HSQC spectrum ( $^1\text{H}$  8.3–5.3 ppm vs.  $^{15}\text{N}$  118–100 ppm and  $^{15}\text{N}$  133–115 ppm) of free CcrA (in red) and CcrA bound to **6** (titration steps 1–4, step 4 in blue).

**Table S4.** Experimental  $^1\text{H}$ ,  $^{15}\text{N}$  HSQC titration data, and related calculated and fitted data for **4**. Residues displaying a significant chemical shift perturbation (i.e. CSP > 0.0938, where  $\mu$  and  $1\sigma$  were calculated to 0.0481 and 0.0456, respectively) are presented at the first page, and all other residues are presented thereafter. Active site residues are colored in orange, and those that are more likely to be involved in indirect than in direct interactions are colored in pale orange. The  $K_d$  sample mean and standard deviation calculated using the data for the residues showing a significant CSP and representing the L3-L5-L7 binding poses, as well as the whole active site were  $K_{d \text{ L3-L5-L7 site}} = 11 \pm 11 \mu\text{M}$  and  $K_{d \text{ active site}} = 21 \pm 40 \mu\text{M}$ , respectively.

| Loop | Zinc lig. | BBL no. | CcrA residue | $\delta$ (ppm)                |                             |                             |                             |                             |                             |                                  |                                |                                |                                |                                |                                | $\Delta\delta_{\text{final-initial}}$ (ppm) |                       | CSP (ppm)                         |                 | $K_d$ (M) | $\Delta\delta_{\text{max}}$ (ppm) |
|------|-----------|---------|--------------|-------------------------------|-----------------------------|-----------------------------|-----------------------------|-----------------------------|-----------------------------|----------------------------------|--------------------------------|--------------------------------|--------------------------------|--------------------------------|--------------------------------|---------------------------------------------|-----------------------|-----------------------------------|-----------------|-----------|-----------------------------------|
|      |           |         |              | $^1\text{H}_{\text{initial}}$ | $^1\text{H}_{\text{Step1}}$ | $^1\text{H}_{\text{Step2}}$ | $^1\text{H}_{\text{Step3}}$ | $^1\text{H}_{\text{Step4}}$ | $^1\text{H}_{\text{final}}$ | $^{15}\text{N}_{\text{initial}}$ | $^{15}\text{N}_{\text{Step1}}$ | $^{15}\text{N}_{\text{Step2}}$ | $^{15}\text{N}_{\text{Step3}}$ | $^{15}\text{N}_{\text{Step4}}$ | $^{15}\text{N}_{\text{final}}$ | $\Delta^1\text{H}$                          | $\Delta^{15}\text{N}$ | $\Delta^1\text{H}, ^{15}\text{N}$ | $\mu + 1\sigma$ |           |                                   |
|      |           |         | Leu26        | 8.9675                        |                             | 8.9648                      | 9.0129                      | 9.0017                      | 8.9780                      | 127.2824                         |                                | 127.2128                       | 126.9906                       | 126.7499                       | 126.5860                       | 0.0105                                      | -0.6964               | 0.1077                            | 0.0938          |           |                                   |
| L3   |           | 61      | Ile29        | 8.5409                        |                             |                             |                             |                             | 8.4482                      | 127.1389                         |                                |                                |                                |                                | 126.4855                       | -0.0927                                     | -0.6534               | 0.1367                            | 0.0938          | 2.81E-05  | 0.1632                            |
| L3   |           | 62      | Glu30        | 8.9226                        | 8.9184                      | 8.9054                      | 8.8308                      | 8.8254                      | 8.8190                      | 130.1999                         | 130.2179                       | 130.1517                       | 130.1517                       | 130.2073                       | 130.1941                       | -0.1036                                     | -0.0059               | 0.1036                            | 0.0938          | 6.36E-06  | 0.1305                            |
| L3   |           | 64      | Trp32        | 8.4662                        | 8.4703                      | 8.4977                      | 8.5161                      | 8.5669                      | 8.5755                      | 120.3493                         | 120.2996                       | 120.3142                       | 120.2402                       | 120.0601                       | 120.0270                       | 0.1093                                      | -0.3223               | 0.1200                            | 0.0938          | 1.84E-06  | 0.1244                            |
| L3   |           | 65      | Gly33        | 8.3075                        | 8.2945                      | 8.2874                      | 8.2453                      | 8.2110                      | 8.2002                      | 108.9241                         | 109.0331                       | 109.1688                       | 109.3688                       | 109.5679                       | 109.6367                       | -0.1073                                     | 0.7126                | 0.1534                            | 0.0938          | 4.76E-06  | 0.1630                            |
| L3   |           | 67      | Val35        | 8.9808                        | 8.9821                      | 9.0051                      | 9.0116                      | 9.0586                      | 9.0512                      | 128.3195                         | 128.5854                       | 128.9517                       | 129.1945                       | 129.4135                       | 129.4583                       | 0.0705                                      | 1.1388                | 0.1888                            | 0.0938          | 3.90E-06  | 0.2296                            |
| L3   |           | 69      | Ser37        | 9.3571                        |                             |                             |                             |                             | 9.3489                      | 121.5997                         |                                |                                |                                |                                | 122.8785                       | -0.0082                                     | 1.2788                | 0.1969                            | 0.0938          | 2.95E-06  | 0.2176                            |
|      |           |         | Leu51        | 9.1932                        | 9.1757                      | 9.1662                      | 9.1312                      | 9.1228                      | 9.0982                      | 127.2246                         | 127.1931                       | 127.1472                       | 127.0757                       | 126.9808                       | 126.7906                       | -0.0950                                     | -0.4340               | 0.1161                            | 0.0938          | 5.32E-05  | 0.1434                            |
| L7   |           | 117     | Trp83        | 8.4108                        |                             |                             | 8.2670                      | 8.2634                      | 8.2480                      | 115.3771                         |                                |                                | 115.6097                       | 115.7989                       | 115.7125                       | -0.1628                                     | 0.3354                | 0.1708                            | 0.0938          | 6.48E-06  | 0.2165                            |
| L7   | Z1        | 118     | His84        | 5.4751                        | 5.4716                      |                             |                             | 5.4359                      | 5.4390                      | 113.6037                         | 113.4762                       |                                |                                | 112.4046                       | 112.2004                       | -0.0361                                     | -1.4033               | 0.2189                            | 0.0938          | 8.97E-06  | 0.2215                            |
| >L7  |           | 123     | Gly89        | 8.2196                        | 8.2309                      | 8.2713                      | 8.3144                      | 8.3609                      | 8.4077                      | 112.7715                         | 112.7162                       | 112.8186                       | 112.9398                       | 112.9883                       | 113.0422                       | 0.1881                                      | 0.2707                | 0.1926                            | 0.0938          | 3.07E-05  | 0.2222                            |
|      |           |         | Gly90        | 8.5686                        | 8.5577                      | 8.5532                      | 8.5556                      | 8.4630                      | 8.3914                      | 107.4260                         | 107.5317                       | 107.4887                       | 107.3818                       | 107.6971                       | 107.7602                       | -0.1773                                     | 0.3341                | 0.1846                            | 0.0938          | 1.43E-03  | 0.9570                            |
|      |           |         | Asn104       | 8.5178                        | 8.5103                      | 8.4968                      | 8.4732                      | 8.4479                      | 8.4381                      | 118.1388                         | 118.1803                       | 118.2658                       | 118.3421                       | 118.4065                       | 118.4869                       | -0.0798                                     | 0.3481                | 0.0961                            | 0.0938          | 1.16E-05  | 0.1036                            |
|      |           |         | Asp148       | 10.5039                       | 10.5150                     | 10.5258                     | 10.5552                     | 10.6123                     | 10.6234                     | 115.1060                         | 115.1046                       | 115.1479                       | 115.0956                       | 115.2661                       | 115.2644                       | 0.1196                                      | 0.1583                | 0.1220                            | 0.0938          | 1.07E-06  | 0.1246                            |
|      |           |         | Gly162       | 8.2903                        | 8.2981                      | 8.3919                      | 8.4054                      | 8.4333                      | 8.4330                      | 112.6811                         | 112.8069                       | 112.9802                       | 112.9587                       | 113.0233                       | 113.1257                       | 0.1427                                      | 0.4446                | 0.1582                            | 0.0938          | 7.08E-06  | 0.2044                            |
| L10  |           | 226     | Asn169       | 8.6923                        | 8.6950                      | 8.7001                      | 8.8058                      | 8.8396                      | 8.8514                      | 115.2621                         | 115.3302                       | 115.3318                       | 116.0870                       | 116.0699                       | 116.1256                       | 0.1591                                      | 0.8636                | 0.2073                            | 0.0938          | 1.27E-05  | 0.2533                            |
| L10  |           | 227     | Gln170       | 8.0331                        | 8.0420                      | 8.0690                      | 8.1453                      | 8.1480                      | 8.1624                      | 115.3436                         | 115.3237                       | 115.3414                       | 115.1138                       | 115.2825                       | 115.2634                       | 0.1293                                      | -0.0802               | 0.1299                            | 0.0938          | 4.74E-06  | 0.1730                            |
| L10  |           | 229     | Thr172       | 7.1318                        | 7.1161                      | 7.1018                      | 7.0930                      | 7.0697                      | 7.0264                      | 118.3882                         | 118.2629                       | 118.1760                       | 118.0877                       | 118.0104                       | 117.7592                       | -0.1054                                     | -0.6290               | 0.1431                            | 0.0938          | 1.62E-04  | 0.2107                            |
| L10  |           | 232     | Gly175       | 8.0502                        | 8.0643                      | 8.0797                      | 8.1016                      | 8.1393                      | 8.1474                      | 111.0383                         | 111.1136                       | 111.2535                       | 111.3502                       | 111.4617                       | 111.5335                       | 0.0972                                      | 0.4952                | 0.1235                            | 0.0938          | 6.48E-06  | 0.1329                            |
| L10  |           | 235     | Ser178       | 8.2788                        | 8.2596                      | 8.2516                      | 8.2131                      | 8.1937                      | 8.1697                      | 119.5540                         | 119.6505                       | 119.6240                       | 119.4570                       | 119.3914                       | 119.3720                       | -0.1091                                     | -0.1820               | 0.1126                            | 0.0938          | 1.57E-05  | 0.1368                            |
| L10  |           | 239     | Val182       | 8.5416                        | 8.5354                      | 8.5280                      | 8.5158                      | 8.5053                      | 8.5012                      | 120.6946                         | 120.6345                       | 120.5145                       | 120.2628                       | 120.0946                       | 120.0339                       | -0.0404                                     | -0.6607               | 0.1094                            | 0.0938          | 4.76E-06  | 0.1144                            |
| L12  | Z2        | 263     | His206       | 7.7695                        | 7.7757                      | 7.7832                      | 7.8102                      | 7.8095                      | 7.8151                      | 118.1046                         | 118.0683                       | 117.9923                       | 117.8306                       | 117.5736                       | 117.4771                       | 0.0457                                      | -0.6275               | 0.1068                            | 0.0938          | 6.99E-06  | 0.1145                            |
| L12  |           | 265     | Asp208       | 8.9759                        | 8.9599                      | 8.8438                      | 8.8100                      | 8.7921                      | 8.7656                      | 119.9623                         | 119.8942                       | 119.6435                       | 119.7140                       | 119.5854                       | 119.4957                       | -0.2104                                     | -0.4666               | 0.2223                            | 0.0938          | 1.31E-05  | 0.2752                            |
|      |           |         | Gly211       | 9.4583                        | 9.4550                      | 9.4436                      | 9.4391                      | 9.3958                      | 9.3911                      | 116.6772                         | 116.6249                       | 116.5040                       | 116.1239                       | 115.9121                       | 115.7977                       | -0.0672                                     | -0.8796               | 0.1511                            | 0.0938          | 4.11E-06  | 0.1606                            |
|      |           |         | Ile221       | 7.3429                        | 7.3404                      | 7.3356                      | 7.3331                      | 7.3254                      | 7.3245                      | 119.3942                         | 119.5204                       | 119.5888                       | 119.7243                       | 119.9672                       | 120.0420                       | -0.0184                                     | 0.6478                | 0.1013                            | 0.0938          | 6.77E-06  | 0.1042                            |

| Loop | Zinc<br>lig. | BBL<br>no. | CcrA<br>residue | $\delta$ (ppm)                |                             |                             |                             |                             |                             |                                  |                                |                                |                                |                                | $\Delta\delta_{\text{final-initial}}$ (ppm) |                    | CSP (ppm)             |                                   | $K_d$ (M) | $\Delta\delta_{\text{max}}$ (ppm) |                 |
|------|--------------|------------|-----------------|-------------------------------|-----------------------------|-----------------------------|-----------------------------|-----------------------------|-----------------------------|----------------------------------|--------------------------------|--------------------------------|--------------------------------|--------------------------------|---------------------------------------------|--------------------|-----------------------|-----------------------------------|-----------|-----------------------------------|-----------------|
|      |              |            |                 | $^1\text{H}_{\text{initial}}$ | $^1\text{H}_{\text{Step1}}$ | $^1\text{H}_{\text{Step2}}$ | $^1\text{H}_{\text{Step3}}$ | $^1\text{H}_{\text{Step4}}$ | $^1\text{H}_{\text{final}}$ | $^{15}\text{N}_{\text{initial}}$ | $^{15}\text{N}_{\text{Step1}}$ | $^{15}\text{N}_{\text{Step2}}$ | $^{15}\text{N}_{\text{Step3}}$ | $^{15}\text{N}_{\text{Step4}}$ | $^{15}\text{N}_{\text{final}}$              | $\Delta^1\text{H}$ | $\Delta^{15}\text{N}$ | $\Delta^1\text{H}, ^{15}\text{N}$ |           |                                   | $\mu + 1\sigma$ |
|      |              |            | Lys3            | 8.5319                        | 8.5256                      | 8.5293                      | 8.5280                      | 8.5269                      | 8.5264                      | 123.2673                         | 123.2593                       | 123.2715                       | 123.2798                       | 123.2695                       | 123.2608                                    | -0.0055            | -0.0065               | 0.0056                            | 0.0938    | 7.14E-07                          | 0.0186          |
|      |              |            | Ser4            | 8.2759                        | 8.2718                      | 8.2668                      | 8.2611                      | 8.2544                      | 8.2504                      | 118.2903                         | 118.2823                       | 118.2721                       | 118.2618                       | 118.2284                       | 118.2226                                    | -0.0255            | -0.0678               | 0.0276                            | 0.0938    | 1.11E-05                          | 0.0300          |
|      |              |            | Val5            | 9.1140                        | 9.1150                      | 9.1136                      | 9.1142                      | 9.1139                      | 9.1138                      | 122.9661                         | 122.9960                       | 123.0205                       | 123.0731                       | 123.1153                       | 123.1225                                    | -0.0003            | 0.1563                | 0.0240                            | 0.0938    | 1.27E-05                          | 0.0284          |
|      |              |            | Lys6            | 8.6048                        | 8.6020                      | 8.5985                      | 8.5947                      | 8.5909                      | 8.5892                      | 126.7234                         | 126.7422                       | 126.7546                       | 126.7837                       | 126.8142                       | 126.8241                                    | -0.0156            | 0.1008                | 0.0220                            | 0.0938    | 6.20E-06                          | 0.0237          |
|      |              |            | Ile7            | 7.9629                        | 7.9628                      | 7.9667                      | 7.9764                      | 7.9728                      | 7.9744                      | 122.7498                         | 122.8141                       | 122.9041                       | 123.0026                       | 123.2427                       | 123.2607                                    | 0.0115             | 0.5109                | 0.0794                            | 0.0938    | 2.04E-06                          | 0.0823          |
|      |              |            | Ser8            | 8.3879                        | 8.3890                      | 8.3899                      | 8.3921                      | 8.3965                      | 8.3979                      | 115.1988                         | 115.1940                       | 115.1828                       | 115.1724                       | 115.1678                       | 115.1594                                    | 0.0100             | -0.0394               | 0.0117                            | 0.0938    | 1.12E-05                          | 0.0128          |
|      |              |            | Asp9            | 8.7982                        | 8.8059                      | 8.8013                      | 8.7901                      | 8.7985                      | 8.7784                      | 117.5173                         | 117.5011                       | 117.5103                       | 117.4954                       | 117.4674                       | 117.4502                                    | -0.0198            | -0.0671               | 0.0223                            | 0.0938    | 1.44E-04                          | 0.0774          |
|      |              |            | Asp10           | 8.3741                        | 8.3784                      | 8.3740                      | 8.3545                      | 8.3370                      | 8.3309                      | 112.9080                         | 112.9265                       | 112.9290                       | 112.9398                       | 112.8617                       | 112.9668                                    | -0.0432            | 0.0588                | 0.0441                            | 0.0938    | 7.89E-05                          | 0.0845          |
|      |              |            | Ile11           | 7.1617                        | 7.1561                      | 7.1503                      | 7.1367                      | 7.1217                      | 7.1182                      | 118.4876                         | 118.4484                       | 118.3978                       | 118.3179                       | 118.2195                       | 118.1875                                    | -0.0435            | -0.3001               | 0.0635                            | 0.0938    | 4.40E-06                          | 0.0656          |
|      |              |            | Ser12           | 8.6698                        | 8.6717                      | 8.6735                      | 8.6808                      | 8.6792                      | 8.6855                      | 121.8510                         | 121.8657                       | 121.8448                       | 121.8360                       | 121.8549                       | 121.8575                                    | 0.0157             | 0.0065                | 0.0158                            | 0.0938    | 3.14E-05                          | 0.0266          |
|      |              |            | Ile13           | 9.1836                        | 9.1749                      | 9.1687                      | 9.1591                      | 9.1464                      | 9.1433                      | 121.8131                         | 121.7670                       | 121.7145                       | 121.5533                       | 121.4584                       | 121.4022                                    | -0.0403            | -0.4109               | 0.0750                            | 0.0938    | 6.95E-06                          | 0.0803          |
|      |              |            | Thr14           | 9.2902                        | 9.2906                      | 9.2899                      | 9.2966                      | 9.3015                      | 9.3028                      | 122.9015                         | 122.8848                       | 122.8665                       | 122.8612                       | 122.8246                       | 122.8118                                    | 0.0125             | -0.0897               | 0.0186                            | 0.0938    | 4.76E-06                          | 0.0225          |
|      |              |            | Gln15           | 9.0306                        | 9.0250                      | 9.0184                      | 9.0108                      | 9.0002                      | 8.9980                      | 129.4852                         | 129.4643                       | 129.4414                       | 129.3713                       | 129.3428                       | 129.3161                                    | -0.0326            | -0.1691               | 0.0417                            | 0.0938    | 6.43E-06                          | 0.0461          |
|      |              |            | Leu16           | 8.6347                        | 8.6347                      | 8.6347                      | 8.6490                      | 8.6508                      | 8.6539                      | 126.7466                         | 126.7466                       | 126.7466                       | 126.8114                       | 126.8300                       | 126.8558                                    | 0.0193             | 0.1092                | 0.0256                            | 0.0938    | 1.02E-05                          | 0.0263          |
|      |              |            | Ser17           | 8.4401                        | 8.4409                      | 8.4408                      | 8.4441                      | 8.4476                      | 8.4489                      | 115.2956                         | 115.2946                       | 115.2994                       | 115.3148                       | 115.3235                       | 115.3331                                    | 0.0089             | 0.0375                | 0.0106                            | 0.0938    | 1.29E-05                          | 0.0117          |
|      |              |            | Asp18           | 8.5467                        |                             |                             |                             |                             | 8.5514                      | 116.4129                         |                                |                                |                                |                                | 116.3749                                    | 0.0047             | -0.0381               | 0.0075                            | 0.0938    | 1.42E-05                          | 0.0161          |
|      |              |            | Lys19           | 7.5389                        | 7.5428                      | 7.5426                      | 7.5491                      | 7.5554                      | 7.5554                      | 113.7791                         | 113.7811                       | 113.7971                       | 113.8210                       | 113.8428                       | 113.8428                                    | 0.0164             | 0.0637                | 0.0191                            | 0.0938    | 7.95E-06                          | 0.0242          |
|      |              |            | Val20           | 7.0003                        | 7.0002                      | 6.9993                      | 7.0007                      | 7.0023                      | 7.0028                      | 116.0928                         | 116.1001                       | 116.1027                       | 116.1068                       | 116.1154                       | 116.1108                                    | 0.0025             | 0.0180                | 0.0037                            | 0.0938    | 8.68E-06                          | 0.0070          |
|      |              |            | Tyr21           | 9.5351                        | 9.5351                      | 9.5379                      | 9.5379                      | 9.5432                      | 9.5420                      | 126.3223                         | 126.3223                       | 126.3466                       | 126.3466                       | 126.4000                       | 126.4112                                    | 0.0069             | 0.0888                | 0.0153                            | 0.0938    | 5.13E-06                          | 0.0156          |
|      |              |            | Thr22           | 9.5254                        | 9.5204                      | 9.5146                      | 9.5042                      | 9.4963                      | 9.4936                      | 115.6375                         | 115.6287                       | 115.6231                       | 115.5782                       | 115.5352                       | 115.5263                                    | -0.0318            | -0.1112               | 0.0361                            | 0.0938    | 4.33E-06                          | 0.0391          |
|      |              |            | Tyr23           | 8.1055                        | 8.1129                      | 8.1129                      | 8.1129                      | 8.1129                      | 8.1129                      | 124.2430                         | 124.2905                       | 124.2905                       | 124.2905                       | 124.2905                       | 124.2905                                    | 0.0075             | 0.0475                | 0.0104                            | 0.0938    | 2.03E-05                          | 0.0155          |
|      |              |            | Val24           | 8.8762                        | 8.8761                      | 8.8742                      | 8.8734                      | 8.8695                      | 8.8726                      | 120.8474                         | 120.8536                       | 120.8458                       | 120.8273                       | 120.7894                       | 120.7674                                    | -0.0036            | -0.0800               | 0.0128                            | 0.0938    | 1.78E-04                          | 0.0270          |
|      |              |            | Ser25           | 9.7466                        |                             |                             |                             |                             | 9.6863                      | 122.3473                         |                                |                                |                                |                                | 122.7511                                    | -0.0602            | 0.4037                | 0.0865                            | 0.0938    | 5.37E-06                          | 0.1145          |
| L3   |              | 59         | Ala27           | 8.0387                        |                             |                             |                             |                             | 8.0517                      | 124.7999                         |                                |                                |                                |                                | 124.8400                                    | 0.0130             | 0.0401                | 0.0144                            | 0.0938    | 5.88E-06                          | 0.1018          |
| L3   |              | 60         | Glu28           | 8.4534                        | 8.4455                      | 8.4803                      | 8.4928                      | 8.4967                      | 8.5045                      | 122.1025                         | 122.0289                       | 122.3413                       | 122.4148                       | 122.3993                       | 122.4083                                    | 0.0511             | 0.3058                | 0.0695                            | 0.0938    | 9.73E-06                          | 0.1239          |
| L3   |              | 63         | Gly31           | 8.8412                        | 8.8434                      | 8.8436                      | 8.8394                      | 8.8371                      | 8.8346                      | 114.8804                         | 114.9473                       | 115.0319                       | 115.1977                       | 115.3974                       | 115.4793                                    | -0.0065            | 0.5989                | 0.0924                            | 0.0938    | 8.31E-06                          | 0.0945          |
| L3   |              | 66         | Met34           | 8.3966                        | 8.3895                      | 8.3807                      | 8.3481                      | 8.3302                      | 8.3214                      | 121.2299                         | 121.2318                       | 121.2170                       | 121.1917                       | 121.1839                       | 121.1579                                    | -0.0752            | -0.0719               | 0.0760                            | 0.0938    | 6.32E-06                          | 0.0806          |
| L3   |              | 68         | Pro36           |                               |                             |                             |                             |                             |                             |                                  |                                |                                |                                |                                |                                             |                    |                       |                                   |           |                                   |                 |
|      |              |            | Asn38           | 7.9468                        |                             |                             |                             |                             | 7.9476                      | 119.7430                         |                                |                                |                                |                                | 119.7422                                    | 0.0007             | -0.0008               | 0.0007                            | 0.0938    | 9.72E-06                          | 0.0124          |
|      |              |            | Gly39           | 6.5356                        |                             |                             |                             |                             |                             | 102.7295                         |                                |                                |                                |                                |                                             |                    |                       |                                   |           |                                   |                 |
|      |              |            | Met40           | 9.2471                        | 9.2429                      | 9.2327                      | 9.2060                      | 9.1706                      | 9.1626                      | 118.6171                         | 118.6016                       | 118.5634                       | 118.4612                       | 118.3957                       | 118.3646                                    | -0.0845            | -0.2525               | 0.0930                            | 0.0938    | 2.48E-06                          | 0.0925          |
|      |              |            | Ile41           | 9.1390                        | 9.1377                      | 9.1346                      | 9.1211                      | 9.1141                      | 9.1103                      | 122.1769                         | 122.1661                       | 122.1383                       | 122.0997                       | 122.0523                       | 122.0310                                    | -0.0287            | -0.1459               | 0.0364                            | 0.0938    | 6.49E-06                          | 0.0382          |
|      |              |            | Val42           | 9.0482                        | 9.0483                      | 9.0482                      | 9.0499                      | 9.0499                      | 9.0518                      | 128.4050                         | 128.4032                       | 128.3912                       | 128.3576                       | 128.3291                       | 128.3179                                    | 0.0036             | -0.0872               | 0.0139                            | 0.0938    | 1.26E-05                          | 0.0146          |
|      |              |            | Ile43           | 9.2997                        | 9.3050                      | 9.3076                      | 9.3183                      | 9.3314                      | 9.3343                      | 124.6423                         | 124.6500                       | 124.6586                       | 124.6699                       | 124.6811                       | 124.6971                                    | 0.0346             | 0.0548                | 0.0356                            | 0.0938    | 4.58E-06                          | 0.0370          |
|      |              |            | Asn44           | 8.7244                        | 8.7248                      | 8.7251                      | 8.7275                      | 8.7306                      | 8.7319                      | 119.5010                         | 119.5120                       | 119.5239                       | 119.5468                       | 119.5432                       | 119.5560                                    | 0.0076             | 0.0549                | 0.0113                            | 0.0938    | 1.34E-05                          | 0.0142          |
|      |              |            | Asn45           | 8.9302                        | 8.9333                      | 8.9306                      | 8.9320                      | 8.9303                      | 8.9316                      | 124.9789                         | 124.9948                       | 124.9910                       | 125.0085                       | 125.0318                       | 125.0229                                    | 0.0013             | 0.0439                | 0.0069                            | 0.0938    | 9.17E-06                          | 0.0171          |
|      |              |            | His46           | 8.7917                        |                             |                             |                             |                             | 8.7876                      | 108.6323                         |                                |                                |                                |                                | 108.5524                                    | -0.0041            | -0.0799               | 0.0130                            | 0.0938    | 2.73E-06                          | 0.0305          |
|      |              |            | Gln47           | 8.2125                        | 8.2110                      | 8.2087                      | 8.2075                      | 8.2071                      | 8.2059                      | 121.0582                         | 121.0708                       | 121.0812                       | 121.1009                       | 121.1047                       | 121.0982                                    | -0.0067            | 0.0400                | 0.0091                            | 0.0938    | 1.38E-05                          | 0.0125          |
|      |              |            | Ala48           | 8.9885                        | 8.9874                      | 8.9876                      | 8.9841                      | 8.9837                      | 8.9845                      | 121.6942                         | 121.6799                       | 121.6830                       | 121.6710                       | 121.6721                       | 121.6685                                    | -0.0040            | -0.0257               | 0.0056                            | 0.0938    | 1.05E-05                          | 0.0096          |

| Loop | Zinc<br>lig. | BBL<br>no. | CcrA<br>residue | $\delta$ (ppm)                |                             |                             |                             |                             |                             |                                  |                                |                                |                                |                                |                                | $\Delta\delta_{\text{final-initial}}$ (ppm) |                       | CSP (ppm)                         |                 | $K_d$ (M) | $\Delta\delta_{\text{max}}$ (ppm) |
|------|--------------|------------|-----------------|-------------------------------|-----------------------------|-----------------------------|-----------------------------|-----------------------------|-----------------------------|----------------------------------|--------------------------------|--------------------------------|--------------------------------|--------------------------------|--------------------------------|---------------------------------------------|-----------------------|-----------------------------------|-----------------|-----------|-----------------------------------|
|      |              |            |                 | $^1\text{H}_{\text{initial}}$ | $^1\text{H}_{\text{Step1}}$ | $^1\text{H}_{\text{Step2}}$ | $^1\text{H}_{\text{Step3}}$ | $^1\text{H}_{\text{Step4}}$ | $^1\text{H}_{\text{final}}$ | $^{15}\text{N}_{\text{initial}}$ | $^{15}\text{N}_{\text{Step1}}$ | $^{15}\text{N}_{\text{Step2}}$ | $^{15}\text{N}_{\text{Step3}}$ | $^{15}\text{N}_{\text{Step4}}$ | $^{15}\text{N}_{\text{final}}$ | $\Delta^1\text{H}$                          | $\Delta^{15}\text{N}$ | $\Delta^1\text{H}, ^{15}\text{N}$ | $\mu + 1\sigma$ |           |                                   |
|      |              |            | Ala49           | 9.6268                        | 9.6296                      | 9.6322                      | 9.6372                      | 9.6454                      | 9.6471                      | 122.1850                         | 122.2041                       | 122.2274                       | 122.2717                       | 122.3003                       | 122.3174                       | 0.0203                                      | 0.1324                | 0.0288                            | 0.0938          | 5.63E-06  | 0.0305                            |
|      |              |            | Leu50           | 8.6824                        | 8.6767                      | 8.6698                      | 8.6953                      | 8.6838                      | 8.6717                      | 122.6182                         | 122.6030                       | 122.5785                       | 122.5702                       | 122.5157                       | 122.5409                       | -0.0107                                     | -0.0774               | 0.0160                            | 0.0938          | 1.47E-05  | 0.0709                            |
|      |              |            | Asp52           | 7.2866                        | 7.2751                      | 7.2751                      | 7.2751                      | 7.2751                      | 7.2751                      | 111.5786                         | 111.7014                       | 111.7014                       | 111.7014                       | 111.7014                       | 111.7014                       | -0.0115                                     | 0.1229                | 0.0221                            | 0.0938          | 2.03E-05  | 0.0326                            |
|      |              |            | Thr53           | 8.1374                        | 8.1608                      | 8.1584                      | 8.1640                      | 8.1589                      | 8.1533                      | 111.8000                         | 111.6202                       | 111.6160                       | 111.7267                       | 111.8333                       | 111.9276                       | 0.0158                                      | 0.1276                | 0.0252                            | 0.0938          | 1.85E-05  | 0.1018                            |
|      |              |            | Pro54           |                               |                             |                             |                             |                             |                             |                                  |                                |                                |                                |                                |                                |                                             |                       |                                   |                 |           |                                   |
| L5   |              | 87         | Ile55           | 7.8420                        | 7.8420                      | 7.8420                      | 7.8420                      | 7.8420                      | 7.8420                      | 111.6100                         | 111.6100                       | 111.6100                       | 111.6100                       | 111.6100                       | 111.6100                       | 0.0000                                      | 0.0000                | 0.0000                            |                 |           |                                   |
|      |              |            | Asn56           | 6.7350                        | 6.7408                      | 6.7483                      | 6.7638                      | 6.7745                      | 6.7808                      | 111.1513                         | 111.1241                       | 111.1026                       | 111.0720                       | 111.0697                       | 111.0773                       | 0.0458                                      | -0.0740               | 0.0472                            | 0.0938          | 8.25E-06  | 0.0525                            |
|      |              |            | Asp57           | 8.9681                        | 8.9590                      | 8.9513                      | 8.9450                      | 8.9328                      | 8.9294                      | 122.2934                         | 122.2709                       | 122.2967                       | 122.3209                       | 122.2872                       | 122.2537                       | -0.0387                                     | -0.0397               | 0.0392                            | 0.0938          | 1.06E-05  | 0.0491                            |
|      |              |            | Ala58           | 8.2124                        | 8.2088                      | 8.2063                      | 8.2063                      | 8.1963                      | 8.1957                      | 125.1857                         | 125.1865                       | 125.1793                       | 125.1793                       | 125.1642                       | 125.1591                       | -0.0167                                     | -0.0266               | 0.0172                            | 0.0938          | 1.27E-07  | 0.0171                            |
|      |              |            | Gln59           | 8.8411                        | 8.8414                      | 8.8420                      | 8.8446                      | 8.8472                      | 8.8414                      | 116.8580                         | 116.8974                       | 116.9089                       | 116.9768                       | 117.0406                       | 117.0302                       | 0.0003                                      | 0.1722                | 0.0265                            | 0.0938          | 1.49E-05  | 0.0365                            |
|      |              |            | Thr60           | 7.3191                        | 7.3225                      | 7.3274                      | 7.3415                      | 7.3588                      | 7.3722                      | 115.9676                         | 115.9510                       | 115.9643                       | 115.9214                       | 115.9228                       | 115.8705                       | 0.0531                                      | -0.0971               | 0.0552                            | 0.0938          | 9.21E-05  | 0.0751                            |
|      |              |            | Glu61           | 8.1917                        | 8.1944                      | 8.1990                      | 8.2172                      | 8.2328                      | 8.2392                      | 123.0746                         | 123.0682                       | 123.0630                       | 123.0267                       | 122.9831                       | 122.9755                       | 0.0475                                      | -0.0991               | 0.0499                            | 0.0938          | 5.39E-06  | 0.0503                            |
|      |              |            | Met62           | 7.2804                        | 7.2762                      | 7.2710                      | 7.2646                      | 7.2546                      | 7.2522                      | 117.1325                         | 117.1324                       | 117.1353                       | 117.1323                       | 117.1361                       | 117.1379                       | -0.0282                                     | 0.0053                | 0.0282                            | 0.0938          | 4.42E-06  | 0.0298                            |
|      |              |            | Leu63           | 7.6254                        | 7.6213                      | 7.6180                      | 7.6000                      | 7.5844                      | 7.5775                      | 119.6572                         | 119.6818                       | 119.6806                       | 119.6561                       | 119.5546                       | 119.5961                       | -0.0479                                     | -0.0611               | 0.0488                            | 0.0938          | 1.06E-05  | 0.0593                            |
|      |              |            | Val64           | 8.7679                        | 8.7728                      | 8.7812                      | 8.7994                      | 8.8179                      | 8.8246                      | 119.0455                         | 119.0500                       | 119.0407                       | 119.0263                       | 119.0080                       | 119.0024                       | 0.0566                                      | -0.0430               | 0.0570                            | 0.0938          | 5.50E-06  | 0.0589                            |
|      |              |            | Asn65           | 8.8878                        | 8.8885                      | 8.8885                      | 8.8909                      | 8.8924                      | 8.8927                      | 120.3736                         | 120.3777                       | 120.3921                       | 120.4101                       | 120.4289                       | 120.4355                       | 0.0048                                      | 0.0619                | 0.0107                            | 0.0938          | 4.48E-06  | 0.0115                            |
|      |              |            | Trp66           | 7.8034                        | 7.7991                      | 7.7871                      | 7.7794                      | 7.7567                      | 7.7559                      | 122.0783                         | 122.0689                       | 122.0502                       | 122.0166                       | 121.9850                       | 121.9830                       | -0.0475                                     | -0.0953               | 0.0497                            | 0.0938          | 1.91E-05  | 0.0593                            |
|      |              |            | Val67           | 8.4167                        | 8.4163                      | 8.4155                      | 8.4218                      | 8.4249                      | 8.4249                      | 120.7598                         | 120.7684                       | 120.7837                       | 120.8124                       | 120.8265                       | 120.8265                       | 0.0082                                      | 0.0667                | 0.0131                            | 0.0938          | 2.67E-06  | 0.0173                            |
|      |              |            | Thr68           | 8.1672                        | 8.1730                      | 8.1823                      | 8.2119                      | 8.2259                      | 8.2339                      | 114.9753                         | 115.0012                       | 115.0249                       | 115.0744                       | 115.1012                       | 115.1164                       | 0.0667                                      | 0.1411                | 0.0701                            | 0.0938          | 6.46E-06  | 0.0751                            |
|      |              |            | Asp69           | 8.4131                        | 8.4065                      | 8.3977                      | 8.3892                      | 8.3892                      | 8.3892                      | 120.2917                         | 120.3030                       | 120.2986                       | 120.3097                       | 120.3097                       | 120.3097                       | -0.0239                                     | 0.0181                | 0.0241                            | 0.0938          | 2.17E-05  | 0.0345                            |
|      |              |            | Ser70           | 8.4661                        | 8.4652                      | 8.4652                      | 8.4643                      | 8.4649                      | 8.4655                      | 112.6084                         | 112.6031                       | 112.5861                       | 112.5695                       | 112.5673                       | 112.5502                       | -0.0006                                     | -0.0582               | 0.0090                            | 0.0938          | 2.83E-05  | 0.0111                            |
|      |              |            | Leu71           | 6.5884                        | 6.5916                      | 6.5942                      | 6.6018                      | 6.6097                      | 6.6139                      | 115.3195                         | 115.3371                       | 115.3421                       | 115.3453                       | 115.3428                       | 115.3277                       | 0.0255                                      | 0.0082                | 0.0255                            | 0.0938          | 1.49E-05  | 0.0290                            |
|      |              |            | His72           | 6.7498                        | 6.7507                      | 6.7493                      | 6.7521                      | 6.7535                      | 6.7531                      | 112.9035                         | 112.9412                       | 112.9525                       | 112.9638                       | 112.9977                       | 112.9940                       | 0.0033                                      | 0.0905                | 0.0143                            | 0.0938          | 1.39E-05  | 0.0209                            |
|      |              |            | Ala73           | 7.3406                        |                             |                             |                             |                             | 7.3225                      | 119.6001                         |                                |                                |                                |                                | 119.5579                       | -0.0182                                     | -0.0421               | 0.0193                            | 0.0938          | 5.90E-05  | 0.0494                            |
|      |              |            | Lys74           | 7.6534                        | 7.6565                      | 7.6597                      | 7.6695                      | 7.6802                      | 7.6822                      | 119.3172                         | 119.3317                       | 119.3445                       | 119.3622                       | 119.4002                       | 119.4142                       | 0.0288                                      | 0.0969                | 0.0325                            | 0.0938          | 3.05E-06  | 0.0333                            |
|      |              |            | Val75           | 8.9123                        | 8.9097                      | 8.9093                      | 8.9081                      | 8.9064                      | 8.9066                      | 126.6542                         | 126.6430                       | 126.6493                       | 126.6255                       | 126.6128                       | 126.6102                       | -0.0056                                     | -0.0440               | 0.0088                            | 0.0938          | 1.01E-05  | 0.0130                            |
|      |              |            | Thr76           | 9.1848                        | 9.1920                      | 9.1987                      | 9.2140                      | 9.2501                      | 9.2561                      | 117.3328                         | 117.2979                       | 117.2651                       | 117.2424                       | 117.1896                       | 117.1664                       | 0.0713                                      | -0.1664               | 0.0757                            | 0.0938          | 1.67E-06  | 0.0750                            |
|      |              |            | Thr77           | 7.6992                        | 7.6990                      | 7.7055                      | 7.7167                      | 7.7268                      | 7.7304                      | 120.3696                         | 120.4195                       | 120.4439                       | 120.5098                       | 120.5723                       | 120.5901                       | 0.0312                                      | 0.2205                | 0.0461                            | 0.0938          | 5.15E-06  | 0.0514                            |
|      |              |            | Phe78           | 9.1366                        | 9.1353                      | 9.1341                      | 9.1328                      | 9.1309                      | 9.1273                      | 127.2256                         | 127.1991                       | 127.1631                       | 127.1021                       | 127.0555                       | 126.9944                       | -0.0093                                     | -0.2312               | 0.0368                            | 0.0938          | 4.27E-05  | 0.0417                            |
|      |              |            | Ile79           | 7.4964                        | 7.4929                      | 7.4889                      | 7.4831                      | 7.4772                      | 7.4746                      | 126.7232                         | 126.7583                       | 126.8005                       | 126.8422                       | 126.9299                       | 126.9627                       | -0.0218                                     | 0.2395                | 0.0428                            | 0.0938          | 8.88E-06  | 0.0448                            |
|      |              |            | Pro80           |                               |                             |                             |                             |                             |                             |                                  |                                |                                |                                |                                |                                |                                             |                       |                                   |                 |           |                                   |
|      |              |            | Asp81           |                               |                             |                             |                             |                             |                             |                                  |                                |                                |                                |                                |                                |                                             |                       |                                   |                 |           |                                   |
| L7   | Z1           | 116        | His82           | 7.6048                        | 7.6008                      | 7.5960                      | 7.5889                      | 7.5803                      | 7.5762                      | 106.2470                         | 106.2574                       | 106.2754                       | 106.3024                       | 106.3317                       | 106.3421                       | -0.0286                                     | 0.0951                | 0.0322                            | 0.0938          | 9.13E-06  | 0.0341                            |
| >L7  |              | 119        | Gly85           | 8.8291                        |                             |                             |                             |                             | 8.7864                      | 111.9389                         |                                |                                |                                |                                | 111.9444                       | -0.0427                                     | 0.0055                | 0.0427                            |                 |           |                                   |
| >L7  | Z2           | 120        | Asp86           |                               |                             |                             |                             |                             |                             |                                  |                                |                                |                                |                                |                                |                                             |                       |                                   |                 |           |                                   |
| >L7  |              | 121        | Cys87           | 7.8085                        | 7.8241                      | 7.8550                      |                             |                             |                             | 112.9734                         | 112.9861                       | 113.0855                       |                                |                                |                                |                                             |                       |                                   |                 |           |                                   |
| >L7  |              | 122        | Leu88           | 7.4570                        |                             |                             |                             |                             | 7.4471                      | 109.8384                         |                                |                                |                                |                                | 109.6507                       | -0.0099                                     | -0.1877               | 0.0305                            | 0.0938          | 9.31E-04  | 0.1450                            |

| Loop | Zinc<br>lig. | BBL<br>no. | CcrA<br>residue | $\delta$ (ppm)                |                             |                             |                             |                             |                             |                                  |                                |                                |                                |                                | $\Delta\delta_{\text{final-initial}}$ (ppm) |                    | CSP (ppm)             |                                   | $K_d$ (M) | $\Delta\delta_{\text{max}}$ (ppm) |                 |          |        |
|------|--------------|------------|-----------------|-------------------------------|-----------------------------|-----------------------------|-----------------------------|-----------------------------|-----------------------------|----------------------------------|--------------------------------|--------------------------------|--------------------------------|--------------------------------|---------------------------------------------|--------------------|-----------------------|-----------------------------------|-----------|-----------------------------------|-----------------|----------|--------|
|      |              |            |                 | $^1\text{H}_{\text{initial}}$ | $^1\text{H}_{\text{Step1}}$ | $^1\text{H}_{\text{Step2}}$ | $^1\text{H}_{\text{Step3}}$ | $^1\text{H}_{\text{Step4}}$ | $^1\text{H}_{\text{final}}$ | $^{15}\text{N}_{\text{initial}}$ | $^{15}\text{N}_{\text{Step1}}$ | $^{15}\text{N}_{\text{Step2}}$ | $^{15}\text{N}_{\text{Step3}}$ | $^{15}\text{N}_{\text{Step4}}$ | $^{15}\text{N}_{\text{final}}$              | $\Delta^1\text{H}$ | $\Delta^{15}\text{N}$ | $\Delta^1\text{H}, ^{15}\text{N}$ |           |                                   | $\mu + 1\sigma$ |          |        |
| L8   |              | 168        | Leu91           | 7.9096                        | 7.9172                      | 7.9039                      | 7.9008                      | 7.8995                      | 7.8906                      | 120.9449                         | 120.9616                       | 121.0274                       | 121.1184                       | 121.2297                       | 121.1032                                    | -0.0189            | 0.1583                | 0.0308                            | 0.0938    | 4.45E-05                          | 0.0889          |          |        |
|      | Gly92        |            | 9.2203          | 9.2205                        | 9.2205                      | 9.2155                      |                             |                             | 108.5832                    | 108.6418                         | 108.6418                       | 108.5319                       |                                |                                |                                             |                    |                       |                                   | 0.0938    | 2.52E-06                          | 0.0504          |          |        |
|      | Tyr93        |            | 7.3215          | 7.3235                        | 7.3281                      | 7.3369                      | 7.3469                      | 7.3502                      | 122.1288                    | 122.1577                         | 122.1919                       | 122.2311                       | 122.2965                       | 122.3035                       | 0.0287                                      | 0.1748             | 0.0393                | 0.0938                            | 3.87E-06  | 0.0413                            |                 |          |        |
|      | Leu94        |            | 7.1971          | 7.1969                        | 7.2007                      | 7.2044                      | 7.2070                      | 7.1969                      | 115.6404                    | 115.7021                         | 115.5968                       | 115.5483                       | 115.4903                       | 115.7021                       | -0.0002                                     | 0.0617             | 0.0095                | 0.0938                            | 1.75E-04  | 0.1138                            |                 |          |        |
|      | Gln95        |            | 8.6404          | 8.6490                        | 8.6576                      | 8.6491                      | 8.6445                      | 8.6576                      | 118.3276                    | 118.3698                         | 118.3798                       | 118.3426                       | 118.3383                       | 118.3574                       | 0.0172                                      | 0.0298             | 0.0178                | 0.0938                            | 3.03E-05  | 0.0549                            |                 |          |        |
|      | Arg96        |            | 7.6709          | 7.6720                        | 7.6732                      | 7.6768                      | 7.6809                      | 7.6820                      | 120.6424                    | 120.6411                         | 120.6349                       | 120.6167                       | 120.5937                       | 120.5893                       | 0.0111                                      | -0.0530            | 0.0138                | 0.0938                            | 2.29E-06  | 0.0138                            |                 |          |        |
|      | Lys97        |            | 7.2054          | 7.2020                        | 7.1990                      | 7.1931                      | 7.1876                      | 7.1832                      | 116.8032                    | 116.7991                         | 116.7950                       | 116.7862                       | 116.7758                       | 116.7737                       | -0.0223                                     | -0.0295            | 0.0227                | 0.0938                            | 1.86E-05  | 0.0248                            |                 |          |        |
|      | Gly98        |            | 7.7075          | 7.7079                        | 7.7091                      | 7.7111                      | 7.7140                      | 7.7156                      | 107.9620                    | 107.9654                         | 107.9706                       | 107.9828                       | 107.9844                       | 107.9913                       | 0.0081                                      | 0.0293             | 0.0092                | 0.0938                            | 1.94E-05  | 0.0102                            |                 |          |        |
|      | Val99        |            | 7.5250          | 7.5274                        | 7.5309                      | 7.5378                      | 7.5449                      | 7.5481                      | 121.1969                    | 121.2016                         | 121.2106                       | 121.2197                       | 121.2336                       | 121.2413                       | 0.0230                                      | 0.0445             | 0.0240                | 0.0938                            | 8.29E-06  | 0.0251                            |                 |          |        |
|      | Gln100       |            | 8.0953          | 8.1008                        | 8.1068                      | 8.1343                      | 8.1603                      | 8.1685                      | 127.3867                    | 127.3934                         | 127.3784                       | 127.4015                       | 127.3819                       | 127.3842                       | 0.0732                                      | -0.0025            | 0.0732                | 0.0938                            | 3.64E-06  | 0.0744                            |                 |          |        |
|      | Ser101       |            | 8.2223          | 8.2172                        | 8.2146                      | 8.2141                      | 8.2146                      | 8.2140                      | 115.9369                    | 115.9390                         | 115.9310                       | 115.9206                       | 115.9115                       | 115.9071                       | -0.0083                                     | -0.0298            | 0.0095                | 0.0938                            | 8.79E-06  | 0.0148                            |                 |          |        |
|      | Tyr102       |            | 8.6408          | 8.6331                        | 8.6123                      | 8.6048                      | 8.5897                      | 8.5968                      | 121.8988                    | 121.8859                         | 121.8487                       | 121.8484                       | 121.8307                       | 121.8425                       | -0.0439                                     | -0.0563            | 0.0448                | 0.0938                            | 9.19E-06  | 0.0660                            |                 |          |        |
|      | Ala103       |            | 8.9716          | 8.9703                        | 8.9681                      | 8.9659                      | 8.9610                      | 8.9611                      | 117.3203                    | 117.3077                         | 117.3064                       | 117.2859                       | 117.2651                       | 117.2588                       | -0.0105                                     | -0.0614            | 0.0141                | 0.0938                            | 1.36E-06  | 0.0155                            |                 |          |        |
|      | Gln105       |            | 9.4875          | 9.4860                        | 9.4922                      | 9.5032                      | 9.5150                      | 9.5165                      | 132.1719                    | 132.2000                         | 132.2174                       | 132.2351                       | 132.2754                       | 132.2934                       | 0.0290                                      | 0.1215             | 0.0345                | 0.0938                            | 3.31E-06  | 0.0405                            |                 |          |        |
|      | Met106       |            | 7.3888          | 7.3855                        | 7.3762                      | 7.3666                      | 7.3561                      | 7.3510                      | 112.9099                    | 112.8943                         | 112.8772                       | 112.8374                       | 112.8089                       | 112.8103                       | -0.0379                                     | -0.0996            | 0.0409                | 0.0938                            | 7.46E-06  | 0.0443                            |                 |          |        |
|      | Thr107       |            | 7.1186          | 7.1125                        | 7.1125                      | 7.1011                      | 7.0922                      | 7.0881                      | 116.2042                    | 116.1456                         | 116.1456                       | 115.9958                       | 115.9073                       | 115.8770                       | -0.0305                                     | -0.3272            | 0.0589                | 0.0938                            | 5.08E-06  | 0.0608                            |                 |          |        |
|      | Ile108       |            | 7.2285          | 7.2291                        | 7.2298                      | 7.2352                      | 7.2353                      | 7.2390                      | 121.6949                    | 121.6843                         | 121.6831                       | 121.7069                       | 121.6811                       | 121.6799                       | 0.0105                                      | -0.0150            | 0.0107                | 0.0938                            | 2.52E-05  | 0.0178                            |                 |          |        |
|      | Asp109       |            |                 |                               |                             |                             |                             |                             |                             |                                  |                                |                                |                                |                                |                                             |                    |                       |                                   |           |                                   |                 |          |        |
|      |              |            |                 |                               | Leu110                      | 7.6409                      | 7.6412                      | 7.6406                      | 7.6409                      | 7.6404                           | 7.6391                         | 121.7131                       | 121.7174                       | 121.7170                       | 121.7009                                    | 121.6929           | 121.6810              | -0.0018                           | -0.0321   | 0.0053                            | 0.0938          | 6.25E-05 | 0.0089 |
|      |              |            |                 |                               | Ala111                      | 8.4721                      | 8.4812                      | 8.4933                      | 8.4832                      | 8.4921                           | 8.4890                         | 121.6429                       | 121.6884                       | 121.7100                       | 121.6984                                    | 121.7068           | 121.7267              | 0.0170                            | 0.0838    | 0.0213                            | 0.0938          | 8.49E-06 | 0.0548 |
|      |              |            |                 |                               | Lys112                      | 8.4190                      | 8.4104                      | 8.3966                      | 8.3817                      | 8.3836                           | 8.3824                         | 116.3514                       | 116.3187                       | 116.2235                       | 116.1440                                    | 116.1529           | 116.2166              | -0.0366                           | -0.1348   | 0.0420                            | 0.0938          | 1.41E-05 | 0.0713 |
|      |              |            |                 |                               | Glu113                      | 7.6496                      | 7.6419                      | 7.6369                      | 7.6311                      | 7.6138                           | 7.6075                         | 119.6267                       | 119.6289                       | 119.6100                       | 119.6745                                    | 119.7529           | 119.7806              | -0.0421                           | 0.1539    | 0.0483                            | 0.0938          | 9.85E-06 | 0.0551 |
|      |              |            |                 |                               | Lys114                      | 7.7705                      | 7.7763                      | 7.7825                      | 7.8161                      | 7.8427                           | 7.8509                         | 115.8760                       | 115.8672                       | 115.8566                       | 115.8219                                    | 115.7915           | 115.7915              | 0.0804                            | -0.0845   | 0.0814                            | 0.0938          | 3.06E-06 | 0.0823 |
|      |              |            |                 |                               | Gly115                      | 7.7123                      | 7.7106                      | 7.7060                      | 7.7032                      | 7.6971                           | 7.7004                         | 108.6671                       | 108.6198                       | 108.5514                       | 108.3922                                    | 108.2536           | 108.1266              | -0.0119                           | -0.5406   | 0.0840                            | 0.0938          | 3.08E-05 | 0.0929 |
|      |              |            | Leu116          | 8.0819                        | 8.0753                      | 8.0787                      | 8.0793                      | 8.0812                      | 8.0799                      | 122.7001                         | 122.8099                       | 123.1497                       | 123.1497                       | 123.1420                       | 123.1394                                    | -0.0020            | 0.4393                | 0.0676                            | 0.0938    | 2.07E-05                          | 0.1033          |          |        |
|      |              |            | Pro117          |                               |                             |                             |                             |                             |                             |                                  |                                |                                |                                |                                |                                             |                    |                       |                                   |           |                                   |                 |          |        |
|      |              |            | Val118          |                               |                             |                             |                             |                             |                             |                                  |                                |                                |                                |                                |                                             |                    |                       |                                   |           |                                   |                 |          |        |
|      |              |            | Pro119          |                               |                             |                             |                             |                             |                             |                                  |                                |                                |                                |                                |                                             |                    |                       |                                   |           |                                   |                 |          |        |
|      |              |            | Glu120          |                               |                             |                             |                             |                             |                             |                                  |                                |                                |                                |                                |                                             |                    |                       |                                   |           |                                   |                 |          |        |
|      |              |            | His121          | 7.6839                        | 7.6835                      | 7.6832                      | 7.6846                      | 7.6822                      | 7.6812                      | 116.3682                         | 116.4221                       | 116.4593                       | 116.4889                       | 116.5070                       | 116.5365                                    | -0.0027            | 0.1683                | 0.0260                            | 0.0938    | 1.93E-05                          | 0.0315          |          |        |
|      |              |            | Gly122          | 8.6280                        | 8.6233                      | 8.6208                      | 8.6209                      | 8.6209                      | 8.6197                      | 111.1825                         | 111.1728                       | 111.1711                       | 111.1762                       | 111.1867                       | 111.1827                                    | -0.0083            | 0.0003                | 0.0083                            | 0.0938    | 1.58E-05                          | 0.0136          |          |        |
|      |              |            | Phe123          | 7.6702                        | 7.6777                      | 7.6800                      | 7.6828                      | 7.6813                      | 7.6813                      | 115.1616                         | 115.2071                       | 115.2416                       | 115.2607                       | 115.2622                       | 115.2622                                    | 0.0111             | 0.1006                | 0.0191                            | 0.0938    | 2.33E-05                          | 0.0309          |          |        |
|      |              |            | Thr124          | 8.6471                        | 8.6474                      | 8.6479                      | 8.6487                      | 8.6518                      | 8.6506                      | 112.3170                         | 112.3731                       | 112.4141                       | 112.4906                       | 112.5601                       | 112.5857                                    | 0.0034             | 0.2686                | 0.0415                            | 0.0938    | 6.48E-06                          | 0.0446          |          |        |
|      |              |            | Asp125          | 9.0455                        |                             |                             |                             |                             | 8.9546                      | 121.3541                         |                                |                                |                                |                                | 121.3040                                    | -0.0908            | -0.0501               | 0.0912                            | 0.0938    | 4.64E-06                          | 0.0930          |          |        |
|      |              |            | Ser126          | 8.9090                        | 8.9114                      | 8.9129                      | 8.9191                      | 8.9268                      | 8.9290                      | 115.1825                         | 115.2105                       | 115.2293                       | 115.2740                       | 115.3129                       | 115.3342                                    | 0.0200             | 0.1517                | 0.0308                            | 0.0938    | 7.37E-06                          | 0.0323          |          |        |
|      |              |            | Leu127          | 7.6647                        | 7.6606                      | 7.6549                      | 7.6463                      | 7.6382                      | 7.6350                      | 121.2251                         | 121.1900                       | 121.1647                       | 121.1095                       | 121.0586                       | 121.0308                                    | -0.0296            | -0.1944               | 0.0421                            | 0.0938    | 7.93E-06                          | 0.0449          |          |        |
|      |              |            | Thr128          | 8.6539                        | 8.6529                      | 8.6529                      | 8.6399                      | 8.6318                      | 8.6283                      | 124.5567                         | 124.5395                       | 124.5395                       | 124.4961                       | 124.4354                       | 124.4232                                    | -0.0256            | -0.1336               | 0.0328                            | 0.0938    | 3.29E-06                          | 0.0329          |          |        |
|      |              |            | Val129          | 8.8690                        | 8.8722                      | 8.8755                      | 8.8822                      | 8.8912                      | 8.8952                      | 129.8992                         | 129.9251                       | 129.9364                       | 129.9569                       | 129.9794                       | 129.9948                                    | 0.0262             | 0.0955                | 0.0300                            | 0.0938    | 1.17E-05                          | 0.0323          |          |        |
|      |              |            | Ser130          | 8.4369                        | 8.4366                      | 8.4343                      | 8.4325                      | 8.4311                      | 8.4292                      | 119.9128                         | 119.9041                       | 119.8939                       | 119.8863                       | 119.8825                       | 119.8796                                    | -0.0077            | -0.0331               | 0.0093                            | 0.0938    | 1.67E-05                          | 0.0109          |          |        |
|      |              |            | Leu131          | 9.2085                        | 9.2080                      | 9.2072                      | 9.2074                      | 9.2100                      | 9.2118                      | 132.0083                         | 132.0275                       | 132.0445                       | 132.0738                       | 132.0984                       | 132.1149                                    | 0.0033             | 0.1066                | 0.0167                            | 0.0938    | 1.47E-05                          | 0.0191          |          |        |

| Loop | Zinc lig. | BBL no. | CcrA residue | $\delta$ (ppm)                |                             |                             |                             |                             |                             |                                  |                                |                                |                                |                                | $\Delta\delta_{\text{final-initial}}$ (ppm) |                    | CSP (ppm)             |                                   | $K_d$ (M) | $\Delta\delta_{\text{max}}$ (ppm) |                 |
|------|-----------|---------|--------------|-------------------------------|-----------------------------|-----------------------------|-----------------------------|-----------------------------|-----------------------------|----------------------------------|--------------------------------|--------------------------------|--------------------------------|--------------------------------|---------------------------------------------|--------------------|-----------------------|-----------------------------------|-----------|-----------------------------------|-----------------|
|      |           |         |              | $^1\text{H}_{\text{initial}}$ | $^1\text{H}_{\text{Step1}}$ | $^1\text{H}_{\text{Step2}}$ | $^1\text{H}_{\text{Step3}}$ | $^1\text{H}_{\text{Step4}}$ | $^1\text{H}_{\text{final}}$ | $^{15}\text{N}_{\text{initial}}$ | $^{15}\text{N}_{\text{Step1}}$ | $^{15}\text{N}_{\text{Step2}}$ | $^{15}\text{N}_{\text{Step3}}$ | $^{15}\text{N}_{\text{Step4}}$ | $^{15}\text{N}_{\text{final}}$              | $\Delta^1\text{H}$ | $\Delta^{15}\text{N}$ | $\Delta^1\text{H}, ^{15}\text{N}$ |           |                                   | $\mu + 1\sigma$ |
|      |           |         | Asp132       | 8.8062                        | 8.8049                      | 8.8022                      | 8.7993                      | 8.7956                      | 8.7963                      | 127.2099                         | 127.2029                       | 127.1915                       | 127.1759                       | 127.1477                       | 127.1412                                    | -0.0099            | -0.0687               | 0.0145                            | 0.0938    | 1.85E-06                          | 0.0160          |
|      |           |         | Gly133       | 7.1930                        | 7.1922                      | 7.1917                      | 7.1933                      | 7.1934                      | 7.1939                      | 101.8917                         | 101.8905                       | 101.8917                       | 101.8914                       | 101.8992                       | 101.8963                                    | 0.0009             | 0.0046                | 0.0011                            | 0.0938    | 8.50E-06                          | 0.0049          |
|      |           |         | Met134       | 7.2870                        | 7.2868                      | 7.2851                      | 7.2842                      | 7.2839                      | 7.2839                      | 122.7841                         | 122.7882                       | 122.7926                       | 122.7832                       | 122.7906                       | 122.7852                                    | -0.0031            | 0.0011                | 0.0031                            | 0.0938    | 9.76E-06                          | 0.0068          |
|      |           |         | Pro135       |                               |                             |                             |                             |                             |                             |                                  |                                |                                |                                |                                |                                             |                    |                       |                                   |           |                                   |                 |
|      |           |         | Leu136       | 8.9079                        | 8.9106                      | 8.9110                      | 8.9188                      | 8.9239                      | 8.9261                      | 123.2251                         | 123.2362                       | 123.2562                       | 123.2712                       | 123.2968                       | 123.3062                                    | 0.0182             | 0.0811                | 0.0220                            | 0.0938    | 6.14E-06                          | 0.0246          |
|      |           |         | Gln137       | 8.9729                        | 8.9788                      | 8.9794                      | 9.0053                      | 9.0250                      | 9.0298                      | 120.8661                         | 120.8789                       | 120.8892                       | 120.9015                       | 120.9207                       | 120.9259                                    | 0.0569             | 0.0598                | 0.0576                            | 0.0938    | 2.07E-06                          | 0.0591          |
|      |           |         | Cys138       | 8.8177                        | 8.8160                      | 8.8171                      | 8.8159                      | 8.8186                      | 8.8178                      | 123.3267                         | 123.3166                       | 123.3213                       | 123.3157                       | 123.3291                       | 123.3078                                    | 0.0001             | -0.0189               | 0.0029                            | 0.0938    | 6.38E-05                          | 0.0144          |
|      |           |         | Tyr139       | 8.8601                        | 8.8590                      | 8.8614                      | 8.8626                      | 8.8636                      | 8.8652                      | 117.7461                         | 117.7676                       | 117.7657                       | 117.7866                       | 117.8042                       | 117.8139                                    | 0.0051             | 0.0678                | 0.0116                            | 0.0938    | 1.49E-05                          | 0.0160          |
|      |           |         | Tyr140       | 9.1491                        | 9.1436                      | 9.1396                      | 9.1326                      | 9.1226                      | 9.1180                      | 120.9621                         | 120.9413                       | 120.9184                       | 120.8900                       | 120.8405                       | 120.8220                                    | -0.0311            | -0.1401               | 0.0379                            | 0.0938    | 1.06E-05                          | 0.0400          |
|      |           |         | Leu141       | 9.4779                        | 9.4919                      | 9.4977                      | 9.4977                      | 9.5257                      | 9.5305                      | 129.4984                         | 129.4949                       | 129.5160                       | 129.5160                       | 129.5355                       | 129.5462                                    | 0.0527             | 0.0479                | 0.0532                            | 0.0938    | 5.78E-06                          | 0.0555          |
|      |           |         | Gly142       |                               |                             |                             |                             |                             |                             |                                  |                                |                                |                                |                                |                                             |                    |                       |                                   |           |                                   |                 |
|      |           |         | Gly143       | 8.3393                        | 8.3341                      | 8.3257                      | 8.3206                      | 8.3076                      | 8.3044                      | 103.2283                         | 103.1938                       | 103.1384                       | 103.0738                       | 102.9949                       | 102.9608                                    | -0.0349            | -0.2675               | 0.0539                            | 0.0938    | 6.89E-06                          | 0.0571          |
|      |           |         | Gly144       | 7.0293                        | 7.0233                      | 7.0203                      | 7.0063                      | 7.0032                      | 6.9974                      | 105.8883                         | 105.9096                       | 105.9102                       | 105.9167                       | 105.9285                       | 105.9500                                    | -0.0319            | 0.0618                | 0.0333                            | 0.0938    | 1.68E-05                          | 0.0382          |
| L9   | Z1        | 196     | His145       | 5.7441                        | 5.7558                      | 5.7669                      | 5.7839                      | 5.8149                      | 5.8193                      | 130.5358                         | 130.5407                       | 130.4638                       | 130.4818                       | 130.3848                       | 130.3541                                    | 0.0752             | -0.1817               | 0.0802                            | 0.0938    | 3.07E-06                          | 0.0885          |
|      |           |         | Ala146       | 7.3251                        | 7.3167                      | 7.3122                      | 7.2883                      | 7.2644                      | 7.2538                      | 114.2376                         | 114.2575                       | 114.2859                       | 114.3422                       | 114.3746                       | 114.3929                                    | -0.0713            | 0.1553                | 0.0752                            | 0.0938    | 8.33E-06                          | 0.0783          |
|      |           |         | Thr147       |                               |                             |                             |                             |                             |                             |                                  |                                |                                |                                |                                |                                             |                    |                       |                                   |           |                                   |                 |
|      |           |         | Asn149       | 6.8893                        | 6.8833                      | 6.8790                      | 6.8684                      | 6.8569                      | 6.8546                      | 115.5170                         | 115.5000                       | 115.5023                       | 115.4839                       | 115.4603                       | 115.4567                                    | -0.0347            | -0.0603               | 0.0359                            | 0.0938    | 3.17E-06                          | 0.0382          |
|      |           |         | Ile150       |                               |                             |                             |                             |                             |                             |                                  |                                |                                |                                |                                |                                             |                    |                       |                                   |           |                                   |                 |
|      |           |         | Val151       | 8.4921                        | 8.4844                      | 8.4778                      | 8.4646                      | 8.4530                      | 8.4486                      | 105.2112                         | 105.1817                       | 105.1077                       | 105.0063                       | 104.9071                       | 104.8623                                    | -0.0435            | -0.3489               | 0.0691                            | 0.0938    | 6.90E-06                          | 0.0735          |
|      |           |         | Val152       | 8.1091                        | 8.1091                      | 8.1072                      | 8.1121                      | 8.1119                      | 8.1147                      | 118.5850                         | 118.5850                       | 118.6267                       | 118.6748                       | 118.6895                       | 118.6834                                    | 0.0056             | 0.0983                | 0.0161                            | 0.0938    | 7.92E-06                          | 0.0222          |
|      |           |         | Trp153       | 10.0418                       | 10.0408                     | 10.0411                     | 10.0385                     | 10.0400                     | 10.0401                     | 130.2555                         | 130.2446                       | 130.2384                       | 130.2216                       | 130.2083                       | 130.2079                                    | -0.0017            | -0.0476               | 0.0075                            | 0.0938    | 7.27E-06                          | 0.0107          |
|      |           |         | Leu154       | 7.8353                        | 7.8428                      | 7.8501                      | 7.8889                      | 7.9101                      | 7.9221                      | 126.6426                         | 126.6510                       | 126.6322                       | 126.7560                       | 126.7922                       | 126.8224                                    | 0.0868             | 0.1798                | 0.0911                            | 0.0938    | 6.80E-06                          | 0.0969          |
|      |           |         | Pro155       |                               |                             |                             |                             |                             |                             |                                  |                                |                                |                                |                                |                                             |                    |                       |                                   |           |                                   |                 |
|      |           |         | Thr156       | 8.3814                        | 8.3806                      | 8.3784                      | 8.3813                      | 8.3812                      | 8.3791                      | 106.9213                         | 106.9129                       | 106.9060                       | 106.9057                       | 106.8898                       | 106.8807                                    | -0.0023            | -0.0406               | 0.0066                            | 0.0938    | 2.16E-05                          | 0.0129          |
|      |           |         | Glu157       | 6.7402                        | 6.7344                      | 6.7327                      | 6.7281                      | 6.7268                      | 6.7246                      | 116.1464                         | 116.1422                       | 116.1727                       | 116.1988                       | 116.2321                       | 116.2387                                    | -0.0156            | 0.0923                | 0.0211                            | 0.0938    | 8.64E-06                          | 0.0275          |
|      |           |         | Asn158       | 7.6075                        | 7.6088                      | 7.6124                      | 7.6190                      | 7.6263                      | 7.6263                      | 113.5216                         | 113.5154                       | 113.5239                       | 113.5396                       | 113.5390                       | 113.5390                                    | 0.0189             | 0.0174                | 0.0190                            | 0.0938    | 9.73E-06                          | 0.0229          |
|      |           |         | Ile159       | 6.2905                        | 6.2899                      | 6.2876                      | 6.2856                      | 6.2849                      | 6.2829                      | 115.2868                         | 115.3218                       | 115.3519                       | 115.4144                       | 115.4908                       | 115.5215                                    | -0.0076            | 0.2347                | 0.0369                            | 0.0938    | 8.94E-06                          | 0.0385          |
|      |           |         | Leu160       | 8.7176                        | 8.7225                      | 8.7236                      | 8.7366                      | 8.7493                      | 8.7526                      | 128.3687                         | 128.4019                       | 128.4363                       | 128.5059                       | 128.5735                       | 128.6096                                    | 0.0350             | 0.2409                | 0.0510                            | 0.0938    | 6.59E-06                          | 0.0537          |
|      |           |         | Phe161       | 9.8322                        | 9.8281                      | 9.8240                      | 9.8239                      | 9.8213                      | 9.8184                      | 128.5041                         | 128.4682                       | 128.3944                       | 128.2784                       | 128.1529                       | 128.1132                                    | -0.0138            | -0.3909               | 0.0617                            | 0.0938    | 5.67E-06                          | 0.0649          |
|      |           |         | Gly163       |                               | 6.1704                      | 6.1704                      | 6.1704                      | 6.0481                      | 6.0258                      |                                  | 100.4578                       | 100.4578                       | 100.4578                       | 100.7321                       | 100.7664                                    |                    |                       |                                   |           |                                   |                 |
| L10  | Z2        | 221     | Cys164       | 6.5072                        |                             |                             |                             |                             |                             | 119.7912                         |                                |                                |                                |                                |                                             |                    |                       |                                   |           |                                   |                 |
| L10  |           | 222     | Met165       |                               |                             |                             |                             |                             |                             |                                  |                                |                                |                                |                                |                                             |                    |                       |                                   |           |                                   |                 |
| L10  |           | 223     | Leu166       | 8.1350                        | 8.2083                      | 8.2024                      | 8.2004                      | 8.1905                      | 8.1879                      | 117.8707                         | 117.7227                       | 117.6910                       | 117.6488                       | 117.6065                       | 117.5959                                    | 0.0528             | -0.2748               | 0.0677                            | 0.0938    | 1.06E-05                          | 0.1391          |
| L10  |           | 224     | Lys167       | 8.7984                        | 8.8118                      | 8.8130                      | 8.8366                      | 8.8420                      | 8.8625                      | 120.7995                         | 120.7826                       | 120.7621                       | 120.7524                       | 120.6980                       | 120.7341                                    | 0.0641             | -0.0654               | 0.0649                            | 0.0938    | 4.40E-05                          | 0.0834          |
| L10  |           | 225     | Asp168       | 8.0747                        | 8.0757                      | 8.0780                      | 8.0811                      | 8.0909                      | 8.0925                      | 115.8272                         | 115.7658                       | 115.7324                       | 115.6515                       | 115.5930                       | 115.5636                                    | 0.0178             | -0.2636               | 0.0443                            | 0.0938    | 6.47E-06                          | 0.0485          |
| L10  |           | 228     | Ala171       | 7.5872                        |                             |                             |                             |                             | 7.5638                      | 124.5391                         |                                |                                |                                |                                | 124.7870                                    | -0.0235            | 0.2478                | 0.0448                            | 0.0938    | 5.91E-06                          | 0.0475          |
| L10  |           | 230     | Ser173       | 7.6994                        | 7.7075                      | 7.7280                      | 7.7535                      | 7.7517                      | 7.7644                      | 115.2841                         | 115.3306                       | 115.2864                       | 115.4294                       | 115.5224                       | 115.5805                                    | 0.0650             | 0.2964                | 0.0794                            | 0.0938    | 1.36E-05                          | 0.1065          |
| L10  |           | 231     | Ile174       | 8.8516                        | 8.8432                      | 8.8357                      | 8.8315                      | 8.8253                      | 8.8241                      | 123.5167                         | 123.5216                       | 123.4698                       | 123.4981                       | 123.5152                       | 123.5165                                    | -0.0275            | -0.0002               | 0.0275                            | 0.0938    | 6.71E-06                          | 0.0402          |
| L10  |           | 233     | Asn176       | 7.9802                        |                             |                             |                             |                             | 7.9834                      | 124.2352                         |                                |                                |                                |                                | 124.2594                                    | 0.0032             | 0.0242                | 0.0049                            | 0.0938    | 7.26E-06                          | 0.0059          |
| L10  |           | 234     | Ile177       | 8.7659                        | 8.7626                      | 8.7832                      | 8.7687                      | 8.7668                      | 8.7640                      | 122.2116                         | 122.3789                       | 122.5631                       | 122.8007                       | 122.8103                       | 122.7600                                    | -0.0019            | 0.5484                | 0.0844                            | 0.0938    | 2.02E-05                          | 0.0000          |

| Loop | Zinc lig. | BBL no. | CcrA residue | $\delta$ (ppm)                |                             |                             |                             |                             |                             |                                  |                                |                                |                                |                                | $\Delta\delta_{\text{final-initial}}$ (ppm) |                    | CSP (ppm)             |                                   | $K_d$ (M) | $\Delta\delta_{\text{max}}$ (ppm) |                 |
|------|-----------|---------|--------------|-------------------------------|-----------------------------|-----------------------------|-----------------------------|-----------------------------|-----------------------------|----------------------------------|--------------------------------|--------------------------------|--------------------------------|--------------------------------|---------------------------------------------|--------------------|-----------------------|-----------------------------------|-----------|-----------------------------------|-----------------|
|      |           |         |              | $^1\text{H}_{\text{initial}}$ | $^1\text{H}_{\text{Step1}}$ | $^1\text{H}_{\text{Step2}}$ | $^1\text{H}_{\text{Step3}}$ | $^1\text{H}_{\text{Step4}}$ | $^1\text{H}_{\text{final}}$ | $^{15}\text{N}_{\text{initial}}$ | $^{15}\text{N}_{\text{Step1}}$ | $^{15}\text{N}_{\text{Step2}}$ | $^{15}\text{N}_{\text{Step3}}$ | $^{15}\text{N}_{\text{Step4}}$ | $^{15}\text{N}_{\text{final}}$              | $\Delta^1\text{H}$ | $\Delta^{15}\text{N}$ | $\Delta^1\text{H}, ^{15}\text{N}$ |           |                                   | $\mu + 1\sigma$ |
| L10  |           | 236     | Asp179       | 8.1600                        |                             |                             |                             |                             | 8.2005                      | 118.3940                         |                                |                                |                                |                                | 118.7737                                    | 0.0405             | 0.3797                | 0.0711                            | 0.0938    | 7.33E-01                          | 172.5928        |
| L10  |           | 237     | Ala180       | 6.9431                        | 6.9360                      | 6.9287                      | 6.9021                      | 6.8797                      | 6.8726                      | 119.9303                         | 119.9166                       | 119.9074                       | 119.8988                       | 119.8746                       | 119.8717                                    | -0.0705            | -0.0586               | 0.0711                            | 0.0938    | 3.96E-06                          | 0.0734          |
| L10  |           | 238     | Asp181       | 8.0826                        | 8.0770                      | 8.0673                      | 8.0494                      | 8.0300                      | 8.0225                      | 119.4721                         | 119.4824                       | 119.4970                       | 119.5235                       | 119.5593                       | 119.5534                                    | -0.0601            | 0.0813                | 0.0614                            | 0.0938    | 6.33E-06                          | 0.0641          |
| L10  |           | 240     | Thr183       | 7.9090                        | 7.9100                      | 7.9126                      | 7.9172                      | 7.9220                      | 7.9220                      | 109.1739                         | 109.2236                       | 109.2691                       | 109.3706                       | 109.4496                       | 109.4496                                    | 0.0130             | 0.2757                | 0.0444                            | 0.0938    | 4.97E-06                          | 0.0508          |
| L10  |           | 241     | Ala184       | 7.4068                        | 7.4028                      | 7.3995                      | 7.3957                      | 7.3913                      | 7.3896                      | 122.2047                         | 122.2396                       | 122.2807                       | 122.3562                       | 122.4387                       | 122.4722                                    | -0.0172            | 0.2674                | 0.0446                            | 0.0938    | 7.30E-06                          | 0.0467          |
|      |           |         | Trp185       | 7.8336                        | 7.8239                      | 7.8174                      | 7.7980                      | 7.7722                      | 7.7657                      | 119.1851                         | 119.1904                       | 119.1807                       | 119.1931                       | 119.1977                       | 119.1843                                    | -0.0678            | -0.0009               | 0.0678                            | 0.0938    | 4.01E-06                          | 0.0700          |
|      |           |         | Pro186       |                               |                             |                             |                             |                             |                             |                                  |                                |                                |                                |                                |                                             |                    |                       |                                   |           |                                   |                 |
|      |           |         | Lys187       | 7.0496                        | 7.0560                      | 7.0582                      | 7.0747                      | 7.0873                      | 7.0929                      | 116.7515                         | 116.7115                       | 116.6801                       | 116.5660                       | 116.4978                       | 116.4557                                    | 0.0432             | -0.2958               | 0.0628                            | 0.0938    | 7.59E-06                          | 0.0657          |
|      |           |         | Thr188       | 9.0385                        | 9.0297                      | 9.0424                      | 9.0439                      | 9.0511                      | 9.0521                      | 121.3354                         | 121.3596                       | 121.3822                       | 121.3553                       | 121.4831                       | 121.4726                                    | 0.0136             | 0.1371                | 0.0251                            | 0.0938    | 2.55E-06                          | 0.0528          |
|      |           |         | Leu189       | 8.3141                        | 8.3141                      | 8.3189                      | 8.3138                      | 8.3049                      | 8.3013                      | 119.7139                         | 119.7139                       | 119.7419                       | 119.7494                       | 119.7493                       | 119.7493                                    | -0.0127            | 0.0354                | 0.0139                            | 0.0938    | 8.77E-06                          | 0.0186          |
|      |           |         | Asp190       | 7.7654                        | 7.7567                      | 7.7505                      | 7.7375                      | 7.7261                      | 7.7195                      | 119.6661                         | 119.6610                       | 119.6670                       | 119.6735                       | 119.6482                       | 119.6716                                    | -0.0458            | 0.0055                | 0.0458                            | 0.0938    | 1.18E-05                          | 0.0514          |
|      |           |         | Lys191       | 7.7948                        | 7.7910                      | 7.7863                      | 7.7812                      | 7.7764                      | 7.7753                      | 121.4367                         | 121.4423                       | 121.4527                       | 121.4490                       | 121.4506                       | 121.4665                                    | -0.0195            | 0.0299                | 0.0200                            | 0.0938    | 9.20E-06                          | 0.0237          |
|      |           |         | Val192       | 8.2298                        | 8.2298                      | 8.2333                      | 8.2409                      | 8.2460                      | 8.2482                      | 120.9193                         | 120.9193                       | 120.9256                       | 120.9372                       | 120.9605                       | 120.9780                                    | 0.0183             | 0.0587                | 0.0204                            | 0.0938    | 9.21E-06                          | 0.0214          |
|      |           |         | Lys193       | 8.3059                        | 8.3058                      | 8.3035                      | 8.3033                      | 8.3047                      | 8.3040                      | 118.1869                         | 118.1921                       | 118.1911                       | 118.1961                       | 118.1934                       | 118.1992                                    | -0.0019            | 0.0124                | 0.0027                            | 0.0938    | 1.46E-05                          | 0.0071          |
|      |           |         | Ala194       | 7.4440                        | 7.4398                      | 7.4331                      | 7.4234                      | 7.4131                      | 7.4095                      | 116.7294                         | 116.7454                       | 116.7430                       | 116.7455                       | 116.7406                       | 116.7384                                    | -0.0346            | 0.0090                | 0.0346                            | 0.0938    | 6.07E-06                          | 0.0376          |
|      |           |         | Lys195       | 7.3920                        | 7.3929                      | 7.3943                      | 7.3975                      | 7.3996                      | 7.4014                      | 116.4226                         | 116.4191                       | 116.4085                       | 116.4183                       | 116.4129                       | 116.4134                                    | 0.0094             | -0.0092               | 0.0095                            | 0.0938    | 1.14E-05                          | 0.0116          |
|      |           |         | Phe196       | 6.7224                        | 6.7255                      | 6.7279                      | 6.7340                      | 6.7401                      | 6.7432                      | 113.5110                         | 113.4961                       | 113.4843                       | 113.4514                       | 113.4294                       | 113.4183                                    | 0.0208             | -0.0928               | 0.0252                            | 0.0938    | 8.87E-06                          | 0.0267          |
|      |           |         | Pro197       |                               |                             |                             |                             |                             |                             |                                  |                                |                                |                                |                                |                                             |                    |                       |                                   |           |                                   |                 |
|      |           |         | Ser198       | 8.0292                        | 8.0259                      | 8.0295                      | 8.0267                      | 8.0307                      | 8.0280                      | 112.3120                         | 112.3041                       | 112.3016                       | 112.2769                       | 112.3079                       | 112.2752                                    | -0.0012            | -0.0368               | 0.0058                            | 0.0938    | 3.33E-05                          | 0.0266          |
|      |           |         | Ala199       | 7.2055                        | 7.2040                      | 7.2031                      | 7.2029                      | 7.2030                      | 7.2030                      | 123.3036                         | 123.3022                       | 123.3041                       | 123.3028                       | 123.3051                       | 123.3069                                    | -0.0025            | 0.0033                | 0.0025                            | 0.0938    | 9.77E-06                          | 0.0043          |
|      |           |         | Arg200       | 9.3625                        | 9.3671                      | 9.3662                      | 9.3662                      | 9.3724                      | 9.3681                      | 124.6480                         | 124.6402                       | 124.6343                       | 124.6343                       | 124.6160                       | 124.6028                                    | 0.0056             | -0.0452               | 0.0089                            | 0.0938    | 8.56E-05                          | 0.0227          |
|      |           |         | Tyr201       | 7.0427                        | 7.0445                      | 7.0459                      | 7.0528                      | 7.0557                      | 7.0588                      | 111.1193                         | 111.1404                       | 111.1598                       | 111.1825                       | 111.2109                       | 111.2270                                    | 0.0161             | 0.1076                | 0.0231                            | 0.0938    | 1.20E-05                          | 0.0256          |
|      |           |         | Val202       | 9.6339                        | 9.6343                      | 9.6357                      | 9.6409                      | 9.6441                      | 9.6466                      | 123.6092                         | 123.5993                       | 123.5866                       | 123.5508                       | 123.5301                       | 123.5191                                    | 0.0126             | -0.0901               | 0.0188                            | 0.0938    | 9.51E-06                          | 0.0198          |
|      |           |         | Val203       | 8.8841                        | 8.8810                      | 8.8757                      | 8.8770                      | 8.8762                      |                             | 126.7521                         | 126.7399                       | 126.7213                       | 126.6968                       | 126.6469                       |                                             |                    |                       |                                   | 0.0938    | 3.20E-05                          | 0.0312          |
|      |           |         | Pro204       |                               |                             |                             |                             |                             |                             |                                  |                                |                                |                                |                                |                                             |                    |                       |                                   |           |                                   |                 |
|      |           |         | Gly205       | 6.6758                        |                             |                             |                             |                             |                             | 105.2242                         |                                |                                |                                |                                |                                             |                    |                       |                                   |           |                                   |                 |
| L12  |           | 264     | Gly207       | 9.5457                        | 9.5457                      | 9.5457                      | 9.5457                      | 9.5457                      | 9.5457                      | 112.0580                         | 112.0580                       | 112.0580                       | 112.0580                       | 112.0580                       | 112.0580                                    | 0.0000             | 0.0000                | 0.0000                            |           |                                   |                 |
|      |           |         | Tyr209       | 7.0691                        | 7.0662                      | 7.0631                      | 7.0642                      | 7.0631                      | 7.0675                      | 115.8012                         | 115.8320                       | 115.8285                       | 115.8678                       | 115.9147                       | 115.9147                                    | -0.0016            | 0.1135                | 0.0175                            | 0.0938    | 1.44E-05                          | 0.0286          |
|      |           |         | Gly210       | 8.2752                        | 8.2750                      | 8.2757                      | 8.2774                      | 8.2829                      | 8.2869                      | 109.2293                         | 109.2118                       | 109.2075                       | 109.2074                       | 109.2016                       | 109.1921                                    | 0.0117             | -0.0373               | 0.0131                            | 0.0938    | 1.35E-04                          | 0.0217          |
|      |           |         | Thr212       | 8.8334                        | 8.8324                      | 8.8306                      | 8.8280                      | 8.8253                      | 8.8247                      | 109.4416                         | 109.4106                       | 109.3806                       | 109.3188                       | 109.2514                       | 109.2200                                    | -0.0087            | -0.2216               | 0.0352                            | 0.0938    | 8.82E-06                          | 0.0364          |
|      |           |         | Glu213       | 10.1202                       | 10.1235                     | 10.1269                     | 10.1345                     | 10.1432                     | 10.1469                     | 126.8948                         | 126.9014                       | 126.9208                       | 126.9510                       | 126.9653                       | 126.9765                                    | 0.0268             | 0.0817                | 0.0296                            | 0.0938    | 8.38E-06                          | 0.0314          |
|      |           |         | Leu214       | 8.0057                        | 8.0069                      | 8.0081                      | 8.0118                      | 8.0157                      | 8.0173                      | 121.6792                         | 121.6469                       | 121.6469                       | 121.6369                       | 121.6097                       | 121.6125                                    | 0.0115             | -0.0667               | 0.0154                            | 0.0938    | 6.04E-06                          | 0.0189          |
|      |           |         | Ile215       | 8.1385                        | 8.1421                      | 8.1455                      | 8.1697                      | 8.1868                      | 8.1908                      | 121.3343                         | 121.3569                       | 121.3560                       | 121.5306                       | 121.6074                       | 121.6370                                    | 0.0523             | 0.3026                | 0.0700                            | 0.0938    | 2.32E-06                          | 0.0719          |
|      |           |         | Glu216       | 7.1724                        | 7.1800                      | 7.1971                      | 7.2088                      | 7.2143                      | 7.2354                      | 118.8475                         | 118.8673                       | 118.8521                       | 118.8695                       | 118.8932                       | 118.8725                                    | 0.0630             | 0.0249                | 0.0631                            | 0.0938    | 5.05E-05                          | 0.0781          |
|      |           |         | His217       |                               |                             |                             |                             |                             |                             |                                  |                                |                                |                                |                                |                                             |                    |                       |                                   |           |                                   |                 |
|      |           |         | Thr218       | 7.9501                        | 7.9600                      | 7.9741                      | 7.9937                      | 8.0215                      | 8.0266                      | 113.9942                         | 113.9689                       | 113.9824                       | 113.9706                       | 113.9790                       | 113.9790                                    | 0.0764             | -0.0152               | 0.0765                            |           |                                   |                 |

| Loop | Zinc<br>lig. | BBL<br>no. | CcrA<br>residue | $\delta$ (ppm)                |                             |                             |                             |                             |                             |                                  |                                |                                |                                |                                |                                | $\Delta\delta_{\text{final-initial}}$ (ppm) |                       | CSP (ppm)                         |                 | $K_d$ (M) | $\Delta\delta_{\text{max}}$ (ppm) |
|------|--------------|------------|-----------------|-------------------------------|-----------------------------|-----------------------------|-----------------------------|-----------------------------|-----------------------------|----------------------------------|--------------------------------|--------------------------------|--------------------------------|--------------------------------|--------------------------------|---------------------------------------------|-----------------------|-----------------------------------|-----------------|-----------|-----------------------------------|
|      |              |            |                 | $^1\text{H}_{\text{initial}}$ | $^1\text{H}_{\text{Step1}}$ | $^1\text{H}_{\text{Step2}}$ | $^1\text{H}_{\text{Step3}}$ | $^1\text{H}_{\text{Step4}}$ | $^1\text{H}_{\text{final}}$ | $^{15}\text{N}_{\text{initial}}$ | $^{15}\text{N}_{\text{Step1}}$ | $^{15}\text{N}_{\text{Step2}}$ | $^{15}\text{N}_{\text{Step3}}$ | $^{15}\text{N}_{\text{Step4}}$ | $^{15}\text{N}_{\text{final}}$ | $\Delta^1\text{H}$                          | $\Delta^{15}\text{N}$ | $\Delta^1\text{H}, ^{15}\text{N}$ | $\mu + 1\sigma$ |           |                                   |
|      |              |            | Lys219          | 8.1058                        | 8.1061                      | 8.1058                      | 8.1079                      | 8.1089                      | 8.1098                      | 121.9376                         | 121.8950                       | 121.8545                       | 121.7980                       | 121.7246                       | 121.6968                       | 0.0040                                      | -0.2408               | 0.0373                            | 0.0938          | 7.47E-06  | 0.0391                            |
|      |              |            | Gln220          | 7.7866                        | 7.7786                      | 7.7688                      | 7.7501                      | 7.7337                      | 7.7289                      | 117.2077                         | 117.2132                       | 117.1970                       | 117.1777                       | 117.1685                       | 117.1589                       | -0.0577                                     | -0.0488               | 0.0582                            | 0.0938          | 4.64E-06  | 0.0625                            |
|      |              |            | Val222          | 8.1218                        | 8.1313                      | 8.1278                      | 8.1327                      | 8.1379                      | 8.1394                      | 121.3511                         | 121.3360                       | 121.2489                       | 121.1627                       | 121.0812                       | 121.0424                       | 0.0176                                      | -0.3087               | 0.0507                            | 0.0938          | 7.51E-06  | 0.0623                            |
|      |              |            | Asn223          | 8.7261                        | 8.7230                      | 8.7203                      | 8.7175                      | 8.7124                      | 8.7115                      | 118.3947                         | 118.3604                       | 118.3339                       | 118.2704                       | 118.1941                       | 118.1745                       | -0.0146                                     | -0.2202               | 0.0369                            | 0.0938          | 4.08E-06  | 0.0381                            |
|      |              |            | Gln224          | 8.2147                        | 8.2189                      | 8.2220                      | 8.2260                      | 8.2333                      | 8.2358                      | 119.8499                         | 119.8565                       | 119.8602                       | 119.8753                       | 119.8845                       | 119.8869                       | 0.0211                                      | 0.0370                | 0.0218                            | 0.0938          | 7.23E-06  | 0.0234                            |
|      |              |            | Tyr225          | 7.8496                        | 7.8538                      | 7.8587                      | 7.8758                      | 7.8916                      | 7.8963                      | 122.0547                         | 122.0703                       | 122.1115                       | 122.1511                       | 122.1906                       | 122.2091                       | 0.0467                                      | 0.1543                | 0.0524                            | 0.0938          | 4.41E-06  | 0.0550                            |
|      |              |            | Ile226          | 8.5103                        | 8.5139                      | 8.5167                      | 8.5271                      | 8.5327                      | 8.5356                      | 122.4524                         | 122.4548                       | 122.4356                       | 122.4404                       | 122.4450                       | 122.4346                       | 0.0253                                      | -0.0178               | 0.0255                            | 0.0938          | 6.72E-06  | 0.0290                            |
|      |              |            | Glu227          | 8.3306                        | 8.3301                      | 8.3294                      | 8.3549                      | 8.3693                      | 8.3720                      | 119.7383                         | 119.7408                       | 119.7377                       | 119.7168                       | 119.6954                       | 119.7054                       | 0.0414                                      | -0.0329               | 0.0417                            | 0.0938          | 1.74E-06  | 0.0445                            |
|      |              |            | Ser228          | 7.9372                        | 7.9399                      | 7.9431                      | 7.9490                      | 7.9550                      | 7.9573                      | 113.9874                         | 113.9985                       | 114.0054                       | 114.0056                       | 114.0038                       | 114.0033                       | 0.0201                                      | 0.0159                | 0.0203                            | 0.0938          | 6.65E-06  | 0.0221                            |
|      |              |            | Thr229          | 7.4996                        | 7.5036                      | 7.5036                      | 7.5036                      | 7.5036                      | 7.5036                      | 112.0972                         | 112.0925                       | 112.0925                       | 112.0925                       | 112.0925                       | 112.0925                       | 0.0040                                      | -0.0047               | 0.0041                            | 0.0938          | 2.03E-05  | 0.0061                            |
|      |              |            | Ser230          | 7.6869                        | 7.6863                      | 7.6856                      | 7.6864                      | 7.6872                      | 7.6872                      | 117.4185                         | 117.4239                       | 117.4278                       | 117.4306                       | 117.4427                       | 117.4427                       | 0.0003                                      | 0.0242                | 0.0037                            | 0.0938          | 1.13E-05  | 0.0058                            |
|      |              |            | Lys231          | 8.0127                        | 8.0325                      | 8.0549                      | 8.0665                      | 8.0693                      | 8.0723                      | 124.2836                         | 124.2545                       | 124.2836                       | 124.3321                       | 124.2901                       | 124.4340                       | 0.0596                                      | 0.1504                | 0.0639                            | 0.0938          | 2.35E-05  | 0.0988                            |
|      |              |            | Pro232          |                               |                             |                             |                             |                             |                             |                                  |                                |                                |                                |                                |                                |                                             |                       |                                   |                 |           |                                   |

**Table S5.** Experimental  $^1\text{H}$ ,  $^{15}\text{N}$  HSQC titration data, and related calculated and fitted data for **5**. Residues displaying a significant chemical shift perturbation (i.e.  $\text{CSP} > 0.0726$ , where  $\mu$  and  $1\sigma$  were calculated to 0.374 and 0.353, respectively) are presented at the first page, and all other residues are presented thereafter. Active site residues are colored in orange, and those that are more likely to be involved in indirect than in direct interactions are colored in pale orange. The  $K_d$  sample mean and standard deviation calculated using the data for the residues showing a significant CSP and representing the L3-L5-L7 binding poses, as well as the whole active site were  $K_{d \text{ L3-L5-L7 site}} = 34 \pm 43 \mu\text{M}$  and  $K_{d \text{ active site}} = 41 \pm 59 \mu\text{M}$ , respectively.

| Loop | Zinc lig. | BBL no. | CcrA residue | $\delta$ (ppm)                |                             |                             |                             |                             |                             |                             |                                  |                                |                                |                                |                                |                                |                                | $\Delta\delta_{\text{final-initial}}$ (ppm) |                       | CSP (ppm)                         |                 | $K_d$ (M) | $\Delta\delta_{\text{max}}$ (ppm) |
|------|-----------|---------|--------------|-------------------------------|-----------------------------|-----------------------------|-----------------------------|-----------------------------|-----------------------------|-----------------------------|----------------------------------|--------------------------------|--------------------------------|--------------------------------|--------------------------------|--------------------------------|--------------------------------|---------------------------------------------|-----------------------|-----------------------------------|-----------------|-----------|-----------------------------------|
|      |           |         |              | $^1\text{H}_{\text{initial}}$ | $^1\text{H}_{\text{Step1}}$ | $^1\text{H}_{\text{Step2}}$ | $^1\text{H}_{\text{Step3}}$ | $^1\text{H}_{\text{Step4}}$ | $^1\text{H}_{\text{Step5}}$ | $^1\text{H}_{\text{final}}$ | $^{15}\text{N}_{\text{initial}}$ | $^{15}\text{N}_{\text{Step1}}$ | $^{15}\text{N}_{\text{Step2}}$ | $^{15}\text{N}_{\text{Step3}}$ | $^{15}\text{N}_{\text{Step4}}$ | $^{15}\text{N}_{\text{Step5}}$ | $^{15}\text{N}_{\text{final}}$ | $\Delta^1\text{H}$                          | $\Delta^{15}\text{N}$ | $\Delta^1\text{H}, ^{15}\text{N}$ | $\mu + 1\sigma$ |           |                                   |
| L3   |           | 61      | Asp10        | 8.3788                        | 8.3705                      | 8.3444                      | 8.3654                      | 8.3303                      | 8.3234                      | 8.3008                      | 112.9321                         | 112.9210                       | 112.9546                       | 113.0093                       | 113.0889                       | 113.2442                       | 113.2692                       | -0.0780                                     | 0.3371                | 0.0937                            | 0.0726          | 9.07E-06  | 0.1419                            |
|      |           |         | Ile29        | 8.6002                        |                             |                             |                             |                             |                             | 8.5489                      | 127.4735                         |                                |                                |                                |                                |                                | 126.6198                       | -0.0513                                     | -0.8537               | 0.1410                            | 0.0726          | 3.23E-06  | 0.1569                            |
| L3   |           | 62      | Glu30        | 8.9160                        | 8.8867                      | 8.8485                      | 8.8245                      | 8.8197                      | 8.7797                      | 8.7783                      | 129.9276                         | 129.9371                       | 129.9580                       | 129.8578                       | 129.8633                       | 129.9235                       | 129.9481                       | -0.1377                                     | 0.0205                | 0.1377                            | 0.0726          | 2.68E-06  | 0.1538                            |
| L3   |           | 63      | Gly31        | 8.8282                        | 8.8274                      | 8.8227                      | 8.8217                      | 8.8186                      | 8.8183                      | 8.8163                      | 114.6596                         | 114.7640                       | 114.9354                       | 115.0009                       | 115.0662                       | 115.0890                       | 115.1677                       | -0.0119                                     | 0.5082                | 0.0791                            | 0.0726          | 1.39E-05  | 0.0943                            |
| L3   |           | 64      | Trp32        | 8.4281                        | 8.4477                      | 8.4668                      | 8.4946                      | 8.5048                      | 8.5181                      | 8.5412                      | 120.3194                         | 120.3234                       | 120.2680                       | 120.2588                       | 120.1632                       | 120.1761                       | 120.1266                       | 0.1131                                      | -0.1928               | 0.1169                            | 0.0726          | 1.04E-04  | 0.2231                            |
| L3   |           | 65      | Gly33        | 8.3199                        | 8.3085                      | 8.2779                      | 8.2712                      | 8.2603                      | 8.2392                      | 8.2292                      | 108.7997                         | 108.9324                       | 109.1432                       | 109.1428                       | 109.1740                       | 109.2548                       | 109.4138                       | -0.0906                                     | 0.6140                | 0.1309                            | 0.0726          | 6.58E-05  | 0.2101                            |
| L3   |           | 67      | Val35        | 9.0169                        | 9.0055                      | 9.0013                      | 8.9751                      | 8.9809                      | 8.9928                      | 8.9724                      | 127.8714                         | 128.1542                       | 128.5613                       | 128.6662                       | 128.8682                       | 129.0979                       | 129.1904                       | -0.0445                                     | 1.3190                | 0.2077                            | 0.0726          | 4.14E-07  | 0.1659                            |
| L3   |           | 69      | Ser37        | 9.2551                        |                             |                             |                             |                             |                             | 9.1842                      | 121.5999                         |                                |                                |                                |                                |                                | 122.3115                       | -0.0709                                     | 0.7116                | 0.1304                            | 0.0726          | 5.75E-06  | 0.1750                            |
| L5   |           | 87      | Ile55        | 7.8372                        | 7.8203                      | 7.8006                      | 7.7762                      | 7.7725                      | 7.7694                      | 7.7647                      | 112.2883                         | 112.3755                       | 112.3279                       | 112.3319                       | 112.2405                       | 112.2647                       | 112.2144                       | -0.0725                                     | -0.0739               | 0.0734                            | 0.0726          | 5.04E-06  | 0.0776                            |
| L7   | Z1        | 118     | His84        | 5.4652                        | 5.4614                      | 5.4612                      |                             | 5.4407                      |                             | 5.4472                      | 113.7651                         | 113.2616                       | 112.9834                       |                                | 113.0743                       |                                | 112.7926                       | -0.0180                                     | -0.9725               | 0.1507                            | 0.0726          | 1.32E-05  | 0.2326                            |
| >L7  |           | 123     | Gly89        | 8.2421                        | 8.2705                      | 8.2807                      | 8.3221                      | 8.3542                      | 8.3878                      | 8.3709                      | 112.9895                         | 113.1038                       | 113.0334                       | 112.9728                       | 112.9660                       | 112.9181                       | 112.7976                       | 0.1288                                      | -0.1919               | 0.1322                            | 0.0726          | 3.17E-06  | 0.1754                            |
|      |           |         | Ala111       | 8.4546                        | 8.4841                      | 8.5125                      | 8.5144                      | 8.5451                      | 8.5908                      | 8.5955                      | 121.5383                         | 121.5822                       | 121.6412                       | 121.6567                       | 121.7374                       | 121.7033                       | 121.7250                       | 0.1409                                      | 0.1867                | 0.1438                            | 0.0726          | 4.65E-08  | 0.1403                            |
|      |           |         | Lys114       | 7.7522                        | 7.7664                      | 7.7907                      | 7.7937                      | 7.8090                      | 7.8321                      | 7.8440                      | 116.0651                         | 116.0242                       | 116.0019                       | 115.9541                       | 115.9873                       | 115.9605                       | 115.9739                       | 0.0918                                      | -0.0912               | 0.0929                            | 0.0726          | 1.54E-04  | 0.2116                            |
|      |           |         | His121       | 7.6855                        | 7.6866                      | 7.6914                      | 7.7146                      | 7.7659                      | 7.7822                      | 7.7910                      | 116.0412                         | 116.0054                       | 116.0022                       | 115.8358                       | 115.9519                       | 115.9689                       | 115.9395                       | 0.1054                                      | -0.1017               | 0.1066                            | 0.0726          | 1.96E-06  | 0.1185                            |
|      |           |         | Asp125       | 9.0652                        |                             |                             |                             |                             |                             | 8.9783                      | 121.2783                         |                                |                                |                                |                                |                                | 121.2932                       | -0.0869                                     | 0.0149                | 0.0869                            | 0.0726          | 1.65E-06  | 0.0924                            |
| L9   | Z1        | 196     | His145       | 5.7174                        | 5.7424                      | 5.7602                      | 5.7796                      | 5.7908                      | 5.8024                      | 5.8243                      | 130.3228                         | 130.3244                       | 130.3393                       | 130.2440                       | 130.2083                       | 130.2867                       | 130.2351                       | 0.1068                                      | -0.0877               | 0.1077                            | 0.0726          | 8.58E-05  | 0.2005                            |
|      |           |         | Asp148       | 10.4656                       | 10.5006                     | 10.5261                     | 10.5382                     | 10.5538                     | 10.5691                     | 10.5881                     | 115.1030                         | 115.0754                       | 115.0981                       | 115.2188                       | 115.1846                       | 115.1344                       | 115.1487                       | 0.1225                                      | 0.0456                | 0.1227                            | 0.0726          | 1.86E-05  | 0.1662                            |
|      |           |         | Gly162       | 8.3155                        | 8.3444                      | 8.3663                      | 8.3971                      | 8.3890                      | 8.4123                      | 8.4120                      | 112.9381                         | 112.9416                       | 112.9582                       | 112.9874                       | 113.0495                       | 113.0041                       | 113.0137                       | 0.0965                                      | 0.0755                | 0.0972                            | 0.0726          | 9.79E-06  | 0.1444                            |
| L10  |           | 224     | Lys167       | 8.7875                        | 8.8061                      | 8.8226                      | 8.8141                      | 8.8306                      | 8.8389                      | 8.8642                      | 120.9822                         | 120.8655                       | 120.8086                       | 120.8391                       | 120.7711                       | 120.7530                       | 120.7186                       | 0.0767                                      | -0.2636               | 0.0868                            | 0.0726          | 1.02E-04  | 0.1906                            |
| L10  |           | 226     | Asn169       |                               | 8.7961                      | 8.8413                      | 8.8351                      | 8.8707                      |                             | 8.8727                      |                                  | 115.7743                       | 115.8363                       | 115.9298                       | 116.1048                       |                                | 116.1712                       | 0.0766                                      | 0.3969                | 0.0979                            | 0.0726          | 1.05E-05  | 0.1813                            |
| L10  |           | 227     | Gln170       |                               | 8.0848                      | 8.1002                      | 8.1156                      | 8.1395                      |                             | 8.1690                      |                                  | 115.1100                       | 115.1046                       | 115.1049                       | 115.2110                       |                                | 115.1216                       | 0.0843                                      | 0.0116                | 0.0843                            | 0.0726          | 2.14E-04  | 0.2904                            |
| L10  |           | 229     | Thr172       | 7.1288                        | 7.1232                      | 7.1051                      | 7.0991                      | 7.0726                      | 7.0420                      | 7.0268                      | 118.3531                         | 118.2497                       | 118.1619                       | 118.0913                       | 118.0007                       | 117.7498                       | 118.2233                       | -0.1020                                     | -0.1298               | 0.1039                            | 0.0726          | 2.64E-01  | 262.9586                          |
| L10  |           | 230     | Ser173       | 7.6791                        | 7.6905                      | 7.7033                      | 7.7207                      | 7.7350                      | 7.7479                      | 7.7533                      | 115.3682                         | 115.4236                       | 115.4499                       | 115.5014                       | 115.5856                       | 115.5856                       | 115.6028                       | 0.0742                                      | 0.2346                | 0.0826                            | 0.0726          | 1.35E-05  | 0.0989                            |
| L10  |           | 232     | Gly175       | 8.0526                        | 8.0628                      | 8.0909                      | 8.1028                      | 8.1133                      | 8.1205                      | 8.1320                      | 111.2157                         | 111.2442                       | 111.3227                       | 111.2891                       | 111.3675                       | 111.4031                       | 111.4136                       | 0.0795                                      | 0.1978                | 0.0851                            | 0.0726          | 4.79E-06  | 0.0965                            |
| L10  |           | 239     | Val182       | 8.5418                        | 8.5360                      | 8.5258                      | 8.5265                      | 8.5172                      | 8.5194                      | 8.5151                      | 120.6663                         | 120.5745                       | 120.4798                       | 120.3857                       | 120.2395                       | 120.2252                       | 120.1479                       | -0.0267                                     | -0.5184               | 0.0841                            | 0.0726          | 2.29E-06  | 0.0864                            |
| L12  |           | 265     | Asp208       | 8.9104                        | 8.9119                      | 8.8857                      | 8.8706                      | 8.8487                      | 8.8564                      | 8.8492                      | 119.6690                         | 119.5016                       | 119.0911                       | 119.1048                       | 119.1732                       | 119.0488                       | 119.0450                       | -0.0612                                     | -0.6240               | 0.1138                            | 0.0726          | 1.12E-05  | 0.1966                            |
|      |           |         | Glu216       | 7.1408                        | 7.1621                      | 7.1805                      | 7.2035                      | 7.2159                      | 7.2315                      | 7.2490                      | 118.9129                         | 118.9455                       | 118.9372                       | 118.9315                       | 118.8973                       | 118.9035                       | 118.9799                       | 0.1082                                      | 0.0670                | 0.1087                            | 0.0726          | 8.21E-05  | 0.1884                            |
|      |           |         | Ser228       | 7.9397                        | 7.9867                      | 7.9967                      | 8.0030                      | 8.0124                      | 8.0181                      | 8.0204                      | 114.0750                         | 114.2544                       | 114.2822                       | 114.2980                       | 114.3111                       | 114.2938                       | 114.2975                       | 0.0808                                      | 0.2225                | 0.0877                            | 0.0726          | 1.49E-05  | 0.1262                            |

For cells colored in grey, the first titration points were used for estimating the  $^1\text{H}$  and  $^1\text{H}$ ,  $^{15}\text{N}$   $\Delta\delta$  since the initial data points were missing. The absolute values were not used in any further calculations, but the sign of the  $^1\text{H}$   $\Delta\delta$  were used in the DSCP analysis.

| Loop | Zinc<br>lig. | BBL<br>no. | CcrA<br>residue | $\delta$ (ppm)                |                             |                             |                             |                             |                             |                             |                                  |                                |                                |                                |                                |                                | $\Delta\delta_{\text{final-initial}}$ (ppm) |                    | CSP (ppm)             |                                   | $K_d$ (M) | $\Delta\delta_{\text{max}}$ (ppm) |                 |
|------|--------------|------------|-----------------|-------------------------------|-----------------------------|-----------------------------|-----------------------------|-----------------------------|-----------------------------|-----------------------------|----------------------------------|--------------------------------|--------------------------------|--------------------------------|--------------------------------|--------------------------------|---------------------------------------------|--------------------|-----------------------|-----------------------------------|-----------|-----------------------------------|-----------------|
|      |              |            |                 | $^1\text{H}_{\text{initial}}$ | $^1\text{H}_{\text{Step1}}$ | $^1\text{H}_{\text{Step2}}$ | $^1\text{H}_{\text{Step3}}$ | $^1\text{H}_{\text{Step4}}$ | $^1\text{H}_{\text{Step5}}$ | $^1\text{H}_{\text{final}}$ | $^{15}\text{N}_{\text{initial}}$ | $^{15}\text{N}_{\text{Step1}}$ | $^{15}\text{N}_{\text{Step2}}$ | $^{15}\text{N}_{\text{Step3}}$ | $^{15}\text{N}_{\text{Step4}}$ | $^{15}\text{N}_{\text{Step5}}$ | $^{15}\text{N}_{\text{final}}$              | $\Delta^1\text{H}$ | $\Delta^{15}\text{N}$ | $\Delta^1\text{H}, ^{15}\text{N}$ |           |                                   | $\mu + 1\sigma$ |
|      |              |            | Lys3            | 8.5338                        | 8.5321                      | 8.5314                      | 8.5307                      | 8.5313                      | 8.5311                      | 8.5290                      | 123.0993                         | 123.0841                       | 123.0743                       | 123.0667                       | 123.0685                       | 123.0606                       | 123.0491                                    | -0.0048            | -0.0501               | 0.0091                            | 0.0726    | 7.38E-05                          | 0.0163          |
|      |              |            | Ser4            | 8.2760                        | 8.2722                      | 8.2697                      | 8.2670                      | 8.2670                      | 8.2643                      | 8.2616                      | 118.2640                         | 118.2591                       | 118.2511                       | 118.2508                       | 118.2508                       | 118.2390                       | 118.2333                                    | -0.0144            | -0.0307               | 0.0152                            | 0.0726    | 5.08E-05                          | 0.0223          |
|      |              |            | Val5            | 9.1116                        | 9.1109                      | 9.1136                      | 9.1148                      | 9.1125                      | 9.1153                      | 9.1162                      | 122.9812                         | 123.0050                       | 123.0195                       | 123.0356                       | 123.0516                       | 123.0607                       | 123.0684                                    | 0.0046             | 0.0872                | 0.0142                            | 0.0726    | 1.04E-06                          | 0.0175          |
|      |              |            | Lys6            | 8.6114                        | 8.6112                      | 8.6089                      | 8.6064                      | 8.6064                      | 8.6068                      | 8.6032                      | 126.8296                         | 126.8425                       | 126.8686                       | 126.8629                       | 126.8629                       | 126.8994                       | 126.8922                                    | -0.0082            | 0.0626                | 0.0127                            | 0.0726    | 8.81E-04                          | 0.1066          |
|      |              |            | Ile7            | 7.9859                        | 7.9907                      | 7.9810                      | 7.9794                      | 7.9893                      | 7.9910                      | 7.9864                      | 122.7050                         | 122.8039                       | 122.8455                       | 122.9157                       | 122.9208                       | 123.0206                       | 123.0894                                    | 0.0004             | 0.3843                | 0.0591                            | 0.0726    | 1.38E-04                          | 0.1494          |
|      |              |            | Ser8            | 8.3800                        | 8.3854                      | 8.3882                      | 8.3917                      | 8.3917                      | 8.3944                      | 8.3977                      | 115.2463                         | 115.2300                       | 115.2161                       | 115.2084                       | 115.2084                       | 115.2013                       | 115.1939                                    | 0.0176             | -0.0524               | 0.0194                            | 0.0726    | 2.39E-05                          | 0.0247          |
|      |              |            | Asp9            | 8.7975                        | 8.7980                      | 8.7980                      | 8.7992                      | 8.7980                      | 8.7978                      | 8.7978                      | 117.4041                         | 117.4156                       | 117.4156                       | 117.4327                       | 117.4204                       | 117.4240                       | 117.4481                                    | 0.0003             | 0.0439                | 0.0068                            | 0.0726    | 4.74E-03                          | 0.2750          |
|      |              |            | Ile11           | 7.1549                        | 7.1459                      | 7.1446                      | 7.1368                      | 7.1350                      | 7.1279                      | 7.1255                      | 118.3911                         | 118.3616                       | 118.3048                       | 118.2896                       | 118.2704                       | 118.1826                       | 118.1790                                    | -0.0294            | -0.2121               | 0.0439                            | 0.0726    | 5.98E-06                          | 0.0502          |
|      |              |            | Ser12           | 8.6610                        | 8.6728                      | 8.6725                      | 8.6800                      | 8.6785                      | 8.6847                      | 8.6811                      | 121.8702                         | 121.8443                       | 121.8553                       | 121.8716                       | 121.8713                       | 121.8659                       | 121.8936                                    | 0.0200             | 0.0234                | 0.0203                            | 0.0726    | 3.12E-05                          | 0.0467          |
|      |              |            | Ile13           | 9.1783                        | 9.1758                      | 9.1694                      | 9.1664                      | 9.1635                      | 9.1653                      | 9.1526                      | 121.7068                         | 121.6642                       | 121.6092                       | 121.5416                       | 121.4992                       | 121.4854                       | 121.4752                                    | -0.0257            | -0.2317               | 0.0440                            | 0.0726    | 1.50E-04                          | 0.1035          |
|      |              |            | Thr14           | 9.2777                        | 9.2833                      | 9.2869                      | 9.2936                      | 9.2908                      | 9.2948                      | 9.2985                      | 122.7821                         | 122.7940                       | 122.8046                       | 122.8079                       | 122.8006                       | 122.8040                       | 122.8014                                    | 0.0208             | 0.0193                | 0.0211                            | 0.0726    | 8.72E-06                          | 0.0300          |
|      |              |            | Gln15           | 9.0276                        | 9.0235                      | 9.0208                      | 9.0160                      | 9.0160                      | 9.0136                      | 9.0101                      | 129.4002                         | 129.3895                       | 129.3531                       | 129.3542                       | 129.3542                       | 129.3423                       | 129.3188                                    | -0.0175            | -0.0814               | 0.0216                            | 0.0726    | 3.18E-05                          | 0.0305          |
|      |              |            | Leu16           | 8.6400                        | 8.6451                      | 8.6373                      | 8.6466                      | 8.6466                      | 8.6466                      | 8.6536                      | 126.9035                         | 126.8788                       | 126.9001                       | 126.8896                       | 126.8896                       | 126.8896                       | 126.8598                                    | 0.0136             | -0.0437               | 0.0152                            | 0.0726    | 1.23E-05                          | 0.0372          |
|      |              |            | Ser17           | 8.4372                        | 8.4416                      | 8.4433                      | 8.4464                      | 8.4464                      | 8.4490                      | 8.4487                      | 115.2328                         | 115.2576                       | 115.2702                       | 115.2806                       | 115.2806                       | 115.2993                       | 115.2905                                    | 0.0115             | 0.0577                | 0.0146                            | 0.0726    | 2.06E-05                          | 0.0221          |
|      |              |            | Asp18           | 8.5004                        |                             |                             |                             |                             |                             | 8.5346                      | 116.3935                         |                                |                                |                                |                                |                                | 116.3677                                    | 0.0342             | -0.0258               | 0.0345                            | 0.0726    | 1.12E-05                          | 0.0483          |
|      |              |            | Lys19           | 7.5556                        | 7.5595                      | 7.5595                      | 7.5630                      | 7.5630                      | 7.5691                      | 7.5677                      | 113.8744                         | 113.8773                       | 113.8773                       | 113.8725                       | 113.8725                       | 113.8968                       | 113.8701                                    | 0.0121             | -0.0043               | 0.0121                            | 0.0726    | 1.71E-02                          | 1.6916          |
|      |              |            | Val20           | 7.0068                        | 7.0064                      | 7.0083                      | 7.0085                      | 7.0095                      | 7.0089                      | 7.0107                      | 116.1653                         | 116.1594                       | 116.1639                       | 116.1652                       | 116.1634                       | 116.1649                       | 116.1611                                    | 0.0039             | -0.0042               | 0.0039                            | 0.0726    | 2.03E-04                          | 0.0154          |
|      |              |            | Tyr21           | 9.5364                        | 9.5376                      | 9.5402                      | 9.5402                      | 9.5414                      | 9.5445                      | 9.5462                      | 126.3321                         | 126.3521                       | 126.3655                       | 126.3747                       | 126.4097                       | 126.3926                       | 126.4018                                    | 0.0098             | 0.0698                | 0.0145                            | 0.0726    | 4.55E-05                          | 0.0271          |
|      |              |            | Thr22           | 9.5130                        | 9.5110                      | 9.5110                      | 9.5037                      | 9.5019                      | 9.5046                      | 9.4997                      | 115.4566                         | 115.4731                       | 115.4731                       | 115.5185                       | 115.4965                       | 115.5311                       | 115.5418                                    | -0.0133            | 0.0852                | 0.0186                            | 0.0726    | 1.67E-03                          | 0.2855          |
|      |              |            | Tyr23           | 8.0942                        | 8.0903                      | 8.0876                      | 8.0833                      | 8.0815                      | 8.0776                      | 8.0737                      | 124.2653                         | 124.2577                       | 124.2501                       | 124.2803                       | 124.2339                       | 124.2500                       | 124.2704                                    | -0.0205            | 0.0051                | 0.0205                            | 0.0726    | 2.35E-06                          | 0.0280          |
|      |              |            | Val24           | 8.8839                        | 8.8802                      | 8.8810                      | 8.8788                      | 8.8806                      | 8.8793                      | 8.8778                      | 120.7050                         | 120.7345                       | 120.7685                       | 120.8027                       | 120.7895                       | 120.7899                       | 120.7827                                    | -0.0061            | 0.0776                | 0.0134                            | 0.0726    | 1.20E-05                          | 0.0279          |
|      |              |            | Ser25           | 9.6944                        |                             |                             |                             |                             |                             | 9.6854                      | 122.2449                         |                                |                                |                                |                                |                                | 122.3889                                    | -0.0090            | 0.1441                | 0.0239                            | 0.0726    | 2.65E-04                          | 0.2290          |
|      |              |            | Leu26           |                               | 8.9319                      | 8.9319                      | 8.9319                      | 8.9319                      | 8.9319                      |                             |                                  | 127.2400                       | 127.2400                       | 127.2400                       | 127.2400                       | 127.2400                       |                                             |                    |                       |                                   |           |                                   |                 |
| L3   |              | 59         | Ala27           | 8.1010                        |                             |                             |                             |                             |                             | 8.1625                      | 124.8079                         |                                |                                |                                |                                |                                | 124.9552                                    | 0.0615             | 0.1473                | 0.0655                            | 0.0726    | 1.30E-04                          | 0.1503          |
| L3   |              | 60         | Glu28           | 8.4148                        | 8.4154                      | 8.4129                      | 8.4160                      | 8.4153                      | 8.4158                      | 8.4155                      | 122.2919                         | 122.2730                       | 122.2772                       | 122.2969                       | 122.2731                       | 122.2895                       | 122.3169                                    | 0.0007             | 0.0250                | 0.0039                            | 0.0726    | 4.23E-04                          | 0.0720          |
| L3   |              | 66         | Met34           | 8.3811                        | 8.3786                      | 8.3728                      | 8.3684                      | 8.3622                      | 8.3600                      | 8.3554                      | 121.0310                         | 121.1108                       | 121.1748                       | 121.2371                       | 121.2814                       | 121.2771                       | 121.2809                                    | -0.0257            | 0.2499                | 0.0462                            | 0.0726    | 1.29E-05                          | 0.0619          |
| L3   |              | 68         | Pro36           |                               |                             |                             |                             |                             |                             |                             |                                  |                                |                                |                                |                                |                                |                                             |                    |                       |                                   |           |                                   |                 |
|      |              |            | Asn38           | 7.9604                        |                             |                             |                             |                             |                             | 7.9500                      | 119.5388                         |                                |                                |                                |                                |                                | 119.7188                                    | -0.0104            | 0.1800                | 0.0296                            | 0.0726    | 6.84E-05                          | 0.1362          |
|      |              |            | Gly39           |                               |                             |                             |                             |                             |                             |                             |                                  |                                |                                |                                |                                |                                |                                             |                    |                       |                                   |           |                                   |                 |
|      |              |            | Met40           | 9.2505                        | 9.2593                      | 9.2741                      | 9.2625                      | 9.2799                      | 9.2793                      | 9.2793                      | 117.3368                         | 117.2450                       | 117.2079                       | 117.2344                       | 117.3063                       | 117.1911                       | 117.2071                                    | 0.0288             | -0.1297               | 0.0350                            | 0.0726    | 7.92E-06                          | 0.0708          |
|      |              |            | Ile41           | 9.1389                        | 9.1365                      | 9.1274                      | 9.1239                      | 9.1215                      | 9.1149                      | 9.1140                      | 122.0848                         | 122.0848                       | 122.0781                       | 122.0452                       | 122.0289                       | 122.0687                       | 122.0539                                    | -0.0249            | -0.0310               | 0.0253                            | 0.0726    | 4.27E-06                          | 0.0327          |
|      |              |            | Val42           | 9.0551                        | 9.0569                      | 9.0559                      | 9.0547                      | 9.0547                      | 9.0562                      | 9.0556                      | 128.2949                         | 128.3157                       | 128.3229                       | 128.3127                       | 128.3127                       | 128.3195                       | 128.3226                                    | 0.0005             | 0.0278                | 0.0043                            | 0.0726    | 9.74E-06                          | 0.0117          |
|      |              |            | Ile43           | 9.3064                        | 9.3119                      | 9.3128                      | 9.3364                      | 9.3528                      | 9.3512                      | 9.3550                      | 124.6791                         | 124.6156                       | 124.6438                       | 124.6456                       | 124.6491                       | 124.6438                       | 124.6579                                    | 0.0486             | -0.0212               | 0.0487                            | 0.0726    | 3.87E-06                          | 0.0659          |
|      |              |            | Asn44           | 8.7295                        | 8.7274                      | 8.7318                      | 8.7311                      | 8.7311                      | 8.7337                      | 8.7325                      | 119.4979                         | 119.5065                       | 119.5204                       | 119.5306                       | 119.5306                       | 119.5290                       | 119.5389                                    | 0.0030             | 0.0409                | 0.0070                            | 0.0726    | 2.66E-05                          | 0.0178          |
|      |              |            | Asn45           | 8.9617                        | 8.9617                      | 8.9617                      | 8.9617                      | 8.9617                      | 8.9617                      | 8.9620                      | 125.0260                         | 125.0252                       | 125.0259                       | 125.0262                       | 125.0259                       | 125.0262                       | 125.0271                                    | 0.0003             | 0.0011                | 0.0004                            | 0.0726    | 4.59E-02                          | 0.1786          |
|      |              |            | His46           | 8.6459                        |                             |                             |                             |                             |                             | 8.6734                      | 108.8709                         |                                |                                |                                |                                |                                | 109.1132                                    | 0.0275             | 0.2423                | 0.0463                            | 0.0726    | 5.03E-05                          | 0.0739          |
|      |              |            | Gln47           | 8.2478                        | 8.2459                      | 8.2425                      | 8.2403                      | 8.2419                      | 8.2415                      | 8.2405                      | 121.2131                         | 121.2119                       | 121.2081                       | 121.2168                       | 121.2318                       | 121.2183                       | 121.2204                                    | -0.0073            | 0.0072                | 0.0074                            | 0.0726    | 3.22E-07                          | 0.0135          |
|      |              |            | Ala48           | 9.0025                        | 9.0031                      | 9.0033                      | 9.0070                      | 9.0043                      | 9.0021                      | 9.0025                      | 121.7967                         | 121.7835                       | 121.7742                       | 121.7906                       | 121.7822                       | 121.7830                       | 121.7572                                    | 0.0000             | -0.0396               | 0.0061                            | 0.0726    | 1.21E-03                          | 0.1292          |

| Loop | Zinc<br>lig. | BBL<br>no. | CcrA<br>residue | $\delta$ (ppm)                |                            |                            |                            |                            |                            |                             |                                  |                               |                               |                               |                               |                               | $\Delta\delta_{\text{final-initial}}$ (ppm) |                    | CSP (ppm)             |                                   | $K_d$ (M) | $\Delta\delta_{\text{max}}$ (ppm) |                 |
|------|--------------|------------|-----------------|-------------------------------|----------------------------|----------------------------|----------------------------|----------------------------|----------------------------|-----------------------------|----------------------------------|-------------------------------|-------------------------------|-------------------------------|-------------------------------|-------------------------------|---------------------------------------------|--------------------|-----------------------|-----------------------------------|-----------|-----------------------------------|-----------------|
|      |              |            |                 | $^1\text{H}_{\text{initial}}$ | $^1\text{H}_{\text{Sep1}}$ | $^1\text{H}_{\text{Sep2}}$ | $^1\text{H}_{\text{Sep3}}$ | $^1\text{H}_{\text{Sep4}}$ | $^1\text{H}_{\text{Sep5}}$ | $^1\text{H}_{\text{final}}$ | $^{15}\text{N}_{\text{initial}}$ | $^{15}\text{N}_{\text{Sep1}}$ | $^{15}\text{N}_{\text{Sep2}}$ | $^{15}\text{N}_{\text{Sep3}}$ | $^{15}\text{N}_{\text{Sep4}}$ | $^{15}\text{N}_{\text{Sep5}}$ | $^{15}\text{N}_{\text{final}}$              | $\Delta^1\text{H}$ | $\Delta^{15}\text{N}$ | $\Delta^1\text{H}, ^{15}\text{N}$ |           |                                   | $\mu + 1\sigma$ |
|      |              |            | Ala49           | 9.6432                        | 9.6456                     | 9.6449                     | 9.6427                     | 9.6422                     | 9.6452                     | 9.6449                      | 122.2040                         | 122.2368                      | 122.2533                      | 122.3026                      | 122.2714                      | 122.3047                      | 122.3394                                    | 0.0017             | 0.1354                | 0.0209                            | 0.0726    | 3.81E-04                          | 0.1071          |
|      |              |            | Leu50           | 8.6513                        | 8.6434                     | 8.6522                     | 8.6344                     | 8.6258                     | 8.6228                     | 8.6190                      | 122.4424                         | 122.4329                      | 122.4370                      | 122.3809                      | 122.3686                      | 122.3657                      | 122.4098                                    | -0.0323            | -0.0326               | 0.0327                            | 0.0726    | 1.29E-05                          | 0.0654          |
|      |              |            | Leu51           | 9.1689                        | 9.1943                     | 9.2136                     | 9.2389                     | 9.2239                     | 9.2285                     | 9.2116                      | 127.1083                         | 127.1083                      | 127.1810                      | 127.2052                      | 127.4026                      | 127.0877                      | 126.9963                                    | 0.0427             | -0.1120               | 0.0461                            | 0.0726    | 8.48E-04                          | 1.0337          |
|      |              |            | Asp52           | 7.2832                        | 7.2783                     | 7.2724                     | 7.2606                     | 7.2675                     | 7.2712                     | 7.2693                      | 111.7069                         | 111.7697                      | 111.8043                      | 111.6211                      | 111.9133                      | 112.0743                      | 112.0024                                    | -0.0139            | 0.2955                | 0.0475                            | 0.0726    | 3.33E-07                          | 0.1197          |
|      |              |            | Thr53           |                               | 8.0441                     | 8.0420                     | 8.0427                     | 8.0416                     | 8.0415                     | 8.0418                      |                                  | 112.3324                      | 112.3239                      | 112.3162                      | 112.3114                      | 112.3145                      | 112.2989                                    |                    |                       |                                   | 0.0726    | 3.82E-06                          | 0.0136          |
|      |              |            | Pro54           |                               |                            |                            |                            |                            |                            |                             |                                  |                               |                               |                               |                               |                               |                                             |                    |                       |                                   |           |                                   |                 |
|      |              |            | Asn56           | 6.7746                        | 6.7758                     | 6.7758                     | 6.7773                     | 6.7773                     | 6.7779                     | 6.7784                      | 111.0164                         | 111.0190                      | 111.0190                      | 111.0256                      | 111.0256                      | 111.0299                      | 111.0367                                    | 0.0038             | 0.0203                | 0.0049                            | 0.0726    | 2.31E-04                          | 0.0128          |
|      |              |            | Asp57           | 8.9644                        | 8.9603                     | 8.9532                     | 8.9493                     | 8.9383                     | 8.9350                     | 8.9280                      | 122.3640                         | 122.3357                      | 122.3042                      | 122.3379                      | 122.3117                      | 122.2910                      | 122.2820                                    | -0.0364            | -0.0820               | 0.0385                            | 0.0726    | 1.93E-06                          | 0.0418          |
|      |              |            | Ala58           | 8.2246                        | 8.2179                     | 8.2112                     | 8.2078                     | 8.2040                     | 8.2023                     | 8.1990                      | 124.9990                         | 125.0228                      | 125.0012                      | 125.0308                      | 124.9981                      | 125.0167                      | 125.0413                                    | -0.0256            | 0.0423                | 0.0264                            | 0.0726    | 9.38E-06                          | 0.0392          |
|      |              |            | Gln59           | 8.8256                        | 8.8236                     | 8.8289                     | 8.8381                     | 8.8348                     | 8.8211                     | 8.8346                      | 116.8841                         | 116.8456                      | 116.8956                      | 116.9417                      | 116.9487                      | 116.9679                      | 117.0131                                    | 0.0091             | 0.1291                | 0.0218                            | 0.0726    | 3.71E-03                          | 1.1830          |
|      |              |            | Thr60           | 7.3484                        | 7.3394                     | 7.3503                     | 7.3575                     | 7.3439                     | 7.3892                     | 7.3795                      | 116.1529                         | 116.0574                      | 116.2255                      | 116.0214                      | 116.0486                      | 116.0411                      | 115.9490                                    | 0.0312             | -0.2039               | 0.0442                            | 0.0726    | 3.93E-04                          | 0.5366          |
|      |              |            | Glu61           | 8.2159                        | 8.2241                     | 8.2307                     | 8.2353                     | 8.2376                     | 8.2408                     | 8.2411                      | 122.9919                         | 122.9897                      | 122.9907                      | 123.0083                      | 122.9783                      | 122.9796                      | 122.9921                                    | 0.0251             | 0.0002                | 0.0251                            | 0.0726    | 1.42E-05                          | 0.0381          |
|      |              |            | Met62           | 7.2924                        | 7.2864                     | 7.2773                     | 7.2721                     | 7.2672                     | 7.2641                     | 7.2614                      | 117.2134                         | 117.1889                      | 117.1899                      | 117.1673                      | 117.1729                      | 117.1684                      | 117.1672                                    | -0.0310            | -0.0462               | 0.0318                            | 0.0726    | 1.41E-05                          | 0.0415          |
|      |              |            | Leu63           | 7.6051                        | 7.5979                     | 7.6007                     | 7.5986                     | 7.6103                     | 7.6233                     | 7.6204                      | 119.7820                         | 119.4040                      | 119.2452                      | 119.3328                      | 119.2288                      | 119.3109                      | 119.3791                                    | 0.0153             | -0.4029               | 0.0639                            | 0.0726    | 1.68E-05                          | 0.1858          |
|      |              |            | Val64           | 8.7833                        | 8.7939                     | 8.8025                     | 8.8120                     | 8.8196                     | 8.8284                     | 8.8357                      | 119.0705                         | 119.0740                      | 119.0477                      | 119.0650                      | 119.0614                      | 119.0752                      | 119.0465                                    | 0.0524             | -0.0240               | 0.0525                            | 0.0726    | 6.67E-05                          | 0.0863          |
|      |              |            | Asn65           | 8.8954                        | 8.8989                     | 8.8999                     | 8.9009                     | 8.9028                     | 8.9030                     | 8.9010                      | 120.4957                         | 120.4936                      | 120.5012                      | 120.5014                      | 120.5168                      | 120.5192                      | 120.5443                                    | 0.0056             | 0.0486                | 0.0094                            | 0.0726    | 2.49E-04                          | 0.0349          |
|      |              |            | Trp66           | 7.8255                        | 7.8110                     | 7.8039                     | 7.7967                     | 7.7883                     | 7.7841                     | 7.7783                      | 122.1410                         | 122.1286                      | 122.1208                      | 122.1275                      | 122.1172                      | 122.0776                      | 122.0809                                    | -0.0472            | -0.0601               | 0.0481                            | 0.0726    | 1.47E-05                          | 0.0602          |
|      |              |            | Val67           | 8.4469                        | 8.4470                     | 8.4494                     | 8.4545                     | 8.4545                     | 8.4561                     | 8.4551                      | 120.8381                         | 120.8517                      | 120.8292                      | 120.8569                      | 120.8569                      | 120.8792                      | 120.8784                                    | 0.0082             | 0.0403                | 0.0103                            | 0.0726    | 1.03E-05                          | 0.0204          |
|      |              |            | Thr68           | 8.1834                        | 8.1915                     | 8.2039                     | 8.2200                     | 8.2358                     | 8.2335                     | 8.2408                      | 115.0197                         | 115.0471                      | 115.1035                      | 115.0869                      | 115.1213                      | 115.1200                      | 115.1140                                    | 0.0574             | 0.0943                | 0.0592                            | 0.0726    | 8.80E-06                          | 0.0760          |
|      |              |            | Asp69           | 8.3679                        | 8.4227                     | 8.4145                     | 8.4092                     | 8.4068                     | 8.4051                     | 8.3981                      | 120.3103                         | 120.3211                      | 120.3342                      | 120.3376                      | 120.3398                      | 120.3456                      | 120.3813                                    | 0.0302             | 0.0710                | 0.0321                            | 0.0726    | 3.50E-06                          | 0.1033          |
|      |              |            | Ser70           | 8.4738                        | 8.4728                     | 8.4737                     | 8.4710                     | 8.4728                     | 8.4725                     | 8.4695                      | 112.7698                         | 112.7516                      | 112.7350                      | 112.7249                      | 112.6998                      | 112.6877                      | 112.6810                                    | -0.0043            | -0.0888               | 0.0143                            | 0.0726    | 5.87E-05                          | 0.0266          |
|      |              |            | Leu71           | 6.5496                        | 6.5577                     | 6.5602                     | 6.5590                     | 6.5624                     | 6.5639                     | 6.5682                      | 115.0250                         | 115.0190                      | 115.0295                      | 115.0380                      | 115.0163                      | 115.0167                      | 115.0396                                    | 0.0186             | 0.0145                | 0.0188                            | 0.0726    | 3.84E-05                          | 0.0335          |
|      |              |            | His72           | 6.7638                        | 6.7687                     | 6.7715                     | 6.7711                     | 6.7708                     | 6.7725                     | 6.7718                      | 112.6674                         | 112.6786                      | 112.6926                      | 112.7038                      | 112.6702                      | 112.6702                      | 112.7094                                    | 0.0081             | 0.0421                | 0.0103                            | 0.0726    | 2.15E-04                          | 0.0556          |
|      |              |            | Ala73           | 7.4115                        |                            |                            |                            |                            |                            | 7.3838                      | 120.0234                         |                               |                               |                               |                               |                               | 119.8315                                    | -0.0277            | -0.1918               | 0.0405                            | 0.0726    | 6.04E-06                          | 0.0705          |
|      |              |            | Lys74           | 7.6663                        | 7.6541                     | 7.6482                     | 7.6450                     | 7.6450                     | 7.6565                     | 7.6593                      | 119.2391                         | 119.3225                      | 119.3478                      | 119.3586                      | 119.3586                      | 119.3755                      | 119.4092                                    | -0.0070            | 0.1701                | 0.0271                            | 0.0726    | 4.73E-05                          | 0.0682          |
|      |              |            | Val75           | 8.9420                        | 8.9411                     | 8.9411                     | 8.9376                     | 8.9391                     | 8.9397                     | 8.9373                      | 126.7949                         | 126.7826                      | 126.7826                      | 126.7685                      | 126.7781                      | 126.7636                      | 126.7679                                    | -0.0048            | -0.0270               | 0.0063                            | 0.0726    | 1.15E-03                          | 0.0965          |
|      |              |            | Thr76           | 9.1903                        | 9.1983                     | 9.2119                     | 9.2309                     | 9.2483                     | 9.2567                     | 9.2522                      | 117.3266                         | 117.2742                      | 117.2609                      | 117.2504                      | 117.2445                      | 117.2030                      | 117.1825                                    | 0.0619             | -0.1441               | 0.0658                            | 0.0726    | 9.97E-06                          | 0.0879          |
|      |              |            | Thr77           | 7.7205                        | 7.7201                     | 7.7234                     | 7.7224                     | 7.7224                     | 7.7286                     | 7.7285                      | 120.4335                         | 120.4611                      | 120.4862                      | 120.5020                      | 120.5020                      | 120.5252                      | 120.5596                                    | 0.0080             | 0.1262                | 0.0210                            | 0.0726    | 5.27E-04                          | 0.0959          |
|      |              |            | Phe78           | 9.1400                        | 9.1387                     | 9.1362                     | 9.1386                     | 9.1342                     | 9.1357                     | 9.1329                      | 127.1871                         | 127.1512                      | 127.1094                      | 127.1034                      | 127.0699                      | 127.0544                      | 127.0281                                    | -0.0071            | -0.1590               | 0.0255                            | 0.0726    | 2.82E-05                          | 0.0372          |
|      |              |            | Ile79           | 7.5441                        | 7.5317                     | 7.5234                     | 7.5163                     | 7.5131                     | 7.5163                     | 7.5030                      | 126.8853                         | 126.9379                      | 126.9527                      | 126.9640                      | 126.9867                      | 126.9640                      | 127.0146                                    | -0.0411            | 0.1294                | 0.0457                            | 0.0726    | 8.46E-05                          | 0.0906          |
|      |              |            | Pro80           |                               |                            |                            |                            |                            |                            |                             |                                  |                               |                               |                               |                               |                               |                                             |                    |                       |                                   |           |                                   |                 |
|      |              |            | Asp81           |                               |                            |                            |                            |                            |                            |                             |                                  |                               |                               |                               |                               |                               |                                             |                    |                       |                                   |           |                                   |                 |
| L7   | Z1           | 116        | His82           | 7.6096                        | 7.5980                     | 7.5880                     | 7.5929                     | 7.5834                     | 7.5808                     | 7.5782                      | 106.5315                         | 106.4560                      | 106.3637                      | 106.3488                      | 106.3552                      | 106.3548                      | 106.3517                                    | -0.0314            | -0.1798               | 0.0419                            | 0.0726    | 1.14E-05                          | 0.0691          |
| L7   |              | 117        | Trp83           | 8.3596                        | 8.3703                     | 8.3407                     | 8.3411                     | 8.3421                     | 8.3127                     | 8.3112                      | 116.1489                         | 116.1100                      | 116.1466                      | 115.9900                      | 115.9145                      | 115.8463                      | 115.8314                                    | -0.0484            | -0.3176               | 0.0688                            | 0.0726    | 1.21E-05                          | 0.1100          |
| >L7  |              | 119        | Gly85           | 8.8050                        |                            |                            |                            |                            |                            | 8.8050                      | 112.2664                         |                               |                               |                               |                               |                               | 112.2665                                    | 0.0000             | 0.0001                | 0.0000                            | 0.0726    |                                   |                 |
| >L7  | Z2           | 120        | Asp86           |                               |                            |                            |                            |                            |                            |                             |                                  |                               |                               |                               |                               |                               |                                             |                    |                       |                                   |           |                                   |                 |
| >L7  |              | 121        | Cys87           | 7.7984                        | 7.7984                     | 7.7984                     | 7.7982                     | 7.7984                     | 7.7984                     | 7.7984                      | 112.7700                         | 112.7700                      | 112.7700                      | 112.7700                      | 112.7700                      | 112.7700                      | 112.7700                                    | 0.0000             | 0.0000                | 0.0000                            | 0.0726    | 2.51E-05                          | 0.0005          |
| >L7  |              | 122        | Leu88           | 7.3924                        |                            |                            |                            |                            |                            | 7.4036                      | 109.8895                         |                               |                               |                               |                               |                               | 109.6741                                    | 0.0112             | -0.2155               | 0.0350                            | 0.0726    | 4.16E-02                          | 22.7523         |

| Loop | Zinc<br>lig. | BBL<br>no. | CcrA<br>residue | $\delta$ (ppm)                |                             |                             |                             |                             |                             |                             |                                  |                                |                                |                                |                                |                                | $\Delta\delta_{\text{final-initial}}$ (ppm) |                    | CSP                   |                                   | $K_d$ (M) | $\Delta\delta_{\text{max}}$ (ppm) |                 |
|------|--------------|------------|-----------------|-------------------------------|-----------------------------|-----------------------------|-----------------------------|-----------------------------|-----------------------------|-----------------------------|----------------------------------|--------------------------------|--------------------------------|--------------------------------|--------------------------------|--------------------------------|---------------------------------------------|--------------------|-----------------------|-----------------------------------|-----------|-----------------------------------|-----------------|
|      |              |            |                 | $^1\text{H}_{\text{initial}}$ | $^1\text{H}_{\text{Step1}}$ | $^1\text{H}_{\text{Step2}}$ | $^1\text{H}_{\text{Step3}}$ | $^1\text{H}_{\text{Step4}}$ | $^1\text{H}_{\text{Step5}}$ | $^1\text{H}_{\text{final}}$ | $^{15}\text{N}_{\text{initial}}$ | $^{15}\text{N}_{\text{Step1}}$ | $^{15}\text{N}_{\text{Step2}}$ | $^{15}\text{N}_{\text{Step3}}$ | $^{15}\text{N}_{\text{Step4}}$ | $^{15}\text{N}_{\text{Step5}}$ | $^{15}\text{N}_{\text{final}}$              | $\Delta^1\text{H}$ | $\Delta^{15}\text{N}$ | $\Delta^1\text{H}, ^{15}\text{N}$ |           |                                   | $\mu + 1\sigma$ |
|      |              |            | Gly90           |                               |                             |                             |                             |                             |                             |                             |                                  |                                |                                |                                |                                |                                |                                             |                    |                       |                                   |           |                                   |                 |
|      |              |            | Leu91           | 7.9329                        | 7.9571                      | 7.9709                      | 7.9325                      | 7.9567                      | 7.9283                      | 7.9443                      | 120.9340                         | 120.7842                       | 120.7980                       | 120.9411                       | 120.9051                       | 121.0161                       | 120.8322                                    | 0.0113             | -0.1019               | 0.0193                            | 0.0726    | 3.92E-04                          | 0.6190          |
|      |              |            | Gly92           |                               | 8.8969                      | 8.8978                      | 8.8925                      | 8.8925                      | 8.8976                      | 8.8905                      |                                  | 107.8031                       | 107.7212                       | 107.6605                       | 107.6605                       | 107.7059                       | 107.6636                                    |                    |                       |                                   | 0.0726    | 1.28E-04                          | 0.0883          |
|      |              |            | Tyr93           | 7.3534                        | 7.3565                      | 7.3530                      | 7.3557                      | 7.3557                      | 7.3627                      | 7.3634                      | 122.1688                         | 122.2192                       | 122.2151                       | 122.2550                       | 122.2550                       | 122.2694                       | 122.2904                                    | 0.0100             | 0.1215                | 0.0212                            | 0.0726    | 3.02E-05                          | 0.0381          |
|      |              |            | Leu94           | 7.2308                        | 7.2255                      | 7.2227                      | 7.2191                      | 7.2176                      | 7.2161                      | 7.2201                      | 115.6810                         | 115.6110                       | 115.6047                       | 115.5691                       | 115.5433                       | 115.5176                       | 115.4939                                    | -0.0107            | -0.1872               | 0.0307                            | 0.0726    | 2.71E-05                          | 0.0455          |
|      |              |            | Gln95           | 8.6730                        | 8.6833                      | 8.7129                      | 8.7388                      | 8.7381                      | 8.7498                      | 8.7392                      | 118.3906                         | 118.3685                       | 118.2599                       | 118.2735                       | 118.2560                       | 118.2718                       | 118.2456                                    | 0.0663             | -0.1450               | 0.0699                            | 0.0726    | 5.39E-06                          | 0.1062          |
|      |              |            | Arg96           | 7.6614                        | 7.6653                      | 7.6677                      | 7.6704                      | 7.6704                      | 7.6729                      | 7.6768                      | 120.6245                         | 120.6276                       | 120.6197                       | 120.5984                       | 120.5984                       | 120.5966                       | 120.6010                                    | 0.0154             | -0.0236               | 0.0158                            | 0.0726    | 6.85E-05                          | 0.0269          |
|      |              |            | Lys97           | 7.2101                        | 7.2057                      | 7.2028                      | 7.1972                      | 7.1960                      | 7.1952                      | 7.1923                      | 116.7500                         | 116.7486                       | 116.7454                       | 116.7422                       | 116.7503                       | 116.7327                       | 116.7165                                    | -0.0178            | -0.0335               | 0.0185                            | 0.0726    | 3.30E-05                          | 0.0278          |
|      |              |            | Gly98           | 7.7088                        | 7.7116                      | 7.7126                      | 7.7143                      | 7.7145                      | 7.7155                      | 7.7164                      | 107.8746                         | 107.8892                       | 107.9000                       | 107.9096                       | 107.9007                       | 107.9162                       | 107.9213                                    | 0.0075             | 0.0467                | 0.0104                            | 0.0726    | 1.25E-05                          | 0.0148          |
|      |              |            | Val99           | 7.5208                        | 7.5265                      | 7.5304                      | 7.5341                      | 7.5341                      | 7.5413                      | 7.5430                      | 121.1749                         | 121.1835                       | 121.1985                       | 121.2025                       | 121.2025                       | 121.2066                       | 121.2105                                    | 0.0222             | 0.0356                | 0.0228                            | 0.0726    | 3.06E-05                          | 0.0307          |
|      |              |            | Gln100          | 8.1271                        | 8.1271                      | 8.1510                      | 8.1532                      | 8.1591                      | 8.1667                      | 8.1704                      | 127.2151                         | 127.2176                       | 127.2263                       | 127.2096                       | 127.2248                       | 127.1994                       | 127.2186                                    | 0.0433             | 0.0036                | 0.0433                            | 0.0726    | 3.32E-06                          | 0.0486          |
|      |              |            | Ser101          | 8.2512                        | 8.2577                      | 8.2658                      | 8.2701                      | 8.2679                      | 8.2712                      | 8.2806                      | 115.6279                         | 115.6321                       | 115.6111                       | 115.6262                       | 115.5987                       | 115.6129                       | 115.6350                                    | 0.0294             | 0.0071                | 0.0294                            | 0.0726    | 1.68E-04                          | 0.0825          |
|      |              |            | Tyr102          | 8.6416                        | 8.6417                      | 8.6305                      | 8.6178                      | 8.6230                      | 8.6190                      | 8.6107                      | 122.1301                         | 122.1105                       | 122.1244                       | 122.0030                       | 122.0515                       | 122.0200                       | 122.0446                                    | -0.0309            | -0.0855               | 0.0336                            | 0.0726    | 8.83E-07                          | 0.0571          |
|      |              |            | Ala103          | 8.9190                        | 8.9178                      | 8.9178                      | 8.9147                      | 8.9136                      | 8.9139                      | 8.9128                      | 117.4302                         | 117.4090                       | 117.4090                       | 117.3884                       | 117.4032                       | 117.3709                       | 117.3625                                    | -0.0062            | -0.0677               | 0.0121                            | 0.0726    | 4.01E-04                          | 0.0609          |
|      |              |            | Asn104          | 8.5151                        | 8.5063                      | 8.4890                      | 8.4897                      | 8.4767                      | 8.4730                      | 8.4679                      | 118.2350                         | 118.2841                       | 118.3124                       | 118.3635                       | 118.4447                       | 118.4447                       | 118.4715                                    | -0.0472            | 0.2365                | 0.0596                            | 0.0726    | 1.44E-05                          | 0.0792          |
|      |              |            | Gln105          | 9.4873                        | 9.4945                      | 9.5039                      | 9.5083                      | 9.5104                      | 9.5149                      | 9.5154                      | 132.1319                         | 132.1563                       | 132.1642                       | 132.2015                       | 132.2062                       | 132.2298                       | 132.2348                                    | 0.0280             | 0.1029                | 0.0322                            | 0.0726    | 1.17E-05                          | 0.0420          |
|      |              |            | Met106          | 7.3943                        | 7.3863                      | 7.3813                      | 7.3791                      | 7.3754                      | 7.3706                      | 7.3647                      | 113.0083                         | 112.9783                       | 112.9614                       | 112.9540                       | 112.9488                       | 112.9349                       | 112.8954                                    | -0.0296            | -0.1128               | 0.0343                            | 0.0726    | 1.28E-04                          | 0.0659          |
|      |              |            | Thr107          | 7.0983                        | 7.0954                      | 7.0929                      | 7.0897                      | 7.0879                      | 7.0875                      | 7.0829                      | 116.0946                         | 116.0622                       | 116.0586                       | 116.0245                       | 116.0418                       | 116.0401                       | 116.0299                                    | -0.0154            | -0.0647               | 0.0183                            | 0.0726    | 1.88E-05                          | 0.0274          |
|      |              |            | Ile108          | 7.2239                        | 7.2253                      | 7.2266                      | 7.2284                      | 7.2284                      | 7.2304                      | 7.2318                      | 121.6114                         | 121.6280                       | 121.6291                       | 121.6290                       | 121.6290                       | 121.6364                       | 121.6195                                    | 0.0079             | 0.0081                | 0.0080                            | 0.0726    | 2.28E-04                          | 0.0270          |
|      |              |            | Asp109          |                               |                             |                             |                             |                             |                             |                             |                                  |                                |                                |                                |                                |                                |                                             |                    |                       |                                   |           |                                   |                 |
|      |              |            | Leu110          | 7.6217                        | 7.6261                      | 7.6345                      | 7.6348                      | 7.6389                      | 7.6391                      | 7.6427                      | 121.5489                         | 121.5584                       | 121.5547                       | 121.5601                       | 121.5490                       | 121.5658                       | 121.5874                                    | 0.0210             | 0.0386                | 0.0218                            | 0.0726    | 3.48E-05                          | 0.0344          |
|      |              |            | Lys112          | 8.4260                        | 8.4275                      | 8.4084                      | 8.4089                      | 8.4227                      | 8.4246                      | 8.4109                      | 116.3380                         | 116.2980                       | 116.3082                       | 116.3528                       | 116.3643                       | 116.3923                       | 116.3872                                    | -0.0150            | 0.0492                | 0.0168                            | 0.0726    | 1.29E-04                          | 0.1257          |
|      |              |            | Glu113          | 7.6426                        | 7.6371                      | 7.6269                      | 7.6274                      | 7.6261                      | 7.6261                      | 7.6253                      | 119.7808                         | 119.7691                       | 119.7596                       | 119.7883                       | 119.8061                       | 119.8203                       | 119.8179                                    | -0.0173            | 0.0371                | 0.0182                            | 0.0726    | 7.12E-06                          | 0.0325          |
|      |              |            | Gly115          | 7.7134                        | 7.7111                      | 7.7106                      | 7.7101                      | 7.7109                      | 7.7093                      | 7.7095                      | 108.6278                         | 108.5731                       | 108.5138                       | 108.4603                       | 108.4321                       | 108.3914                       | 108.3556                                    | -0.0039            | -0.2722               | 0.0421                            | 0.0726    | 1.23E-05                          | 0.0476          |
| L8   |              | 168        | Leu116          | 8.0530                        | 8.0511                      | 8.0474                      | 8.0436                      | 8.0408                      | 8.0363                      | 8.0350                      | 122.8137                         | 122.9405                       | 123.0177                       | 122.9362                       | 122.8937                       | 122.9444                       | 122.9575                                    | -0.0179            | 0.1439                | 0.0285                            | 0.0726    | 1.37E-05                          | 0.0795          |
|      |              |            | Pro117          |                               |                             |                             |                             |                             |                             |                             |                                  |                                |                                |                                |                                |                                |                                             |                    |                       |                                   |           |                                   |                 |
|      |              |            | Val118          |                               |                             |                             |                             |                             |                             |                             |                                  |                                |                                |                                |                                |                                |                                             |                    |                       |                                   |           |                                   |                 |
|      |              |            | Pro119          |                               |                             |                             |                             |                             |                             |                             |                                  |                                |                                |                                |                                |                                |                                             |                    |                       |                                   |           |                                   |                 |
|      |              |            | Glu120          |                               |                             |                             |                             |                             |                             |                             |                                  |                                |                                |                                |                                |                                |                                             |                    |                       |                                   |           |                                   |                 |
|      |              |            | Gly122          |                               | 8.7059                      | 8.7069                      | 8.7061                      | 8.7096                      | 8.7095                      | 8.7063                      |                                  | 111.5791                       | 111.5828                       | 111.5763                       | 111.6063                       | 111.6096                       | 111.5911                                    |                    |                       |                                   | 0.0726    | 4.70E-03                          | 0.3815          |
|      |              |            | Phe123          | 7.6235                        | 7.6193                      | 7.6146                      | 7.6148                      | 7.6144                      | 7.6144                      | 7.6151                      | 115.1832                         | 115.2135                       | 115.2181                       | 115.2432                       | 115.2238                       | 115.2417                       | 115.2643                                    | -0.0083            | 0.0810                | 0.0150                            | 0.0726    | 1.85E-05                          | 0.0292          |
|      |              |            | Thr124          | 8.6640                        | 8.6633                      | 8.6649                      | 8.6629                      | 8.6647                      | 8.6640                      | 8.6670                      | 112.4719                         | 112.5047                       | 112.5389                       | 112.5767                       | 112.6053                       | 112.6042                       | 112.6560                                    | 0.0031             | 0.1841                | 0.0285                            | 0.0726    | 1.53E-04                          | 0.0621          |
|      |              |            | Ser126          | 8.9285                        | 8.9340                      | 8.9340                      | 8.9406                      | 8.9440                      | 8.9457                      | 8.9482                      | 115.3300                         | 115.3408                       | 115.3408                       | 115.3836                       | 115.3927                       | 115.3964                       | 115.4292                                    | 0.0196             | 0.0992                | 0.0249                            | 0.0726    | 8.52E-05                          | 0.0434          |
|      |              |            | Leu127          | 7.6677                        | 7.6640                      | 7.6597                      | 7.6549                      | 7.6508                      | 7.6475                      | 7.6471                      | 121.1332                         | 121.1068                       | 121.0875                       | 121.0680                       | 121.0455                       | 121.0384                       | 121.0145                                    | -0.0205            | -0.1187               | 0.0275                            | 0.0726    | 3.36E-06                          | 0.0291          |
|      |              |            | Thr128          | 8.6515                        | 8.6499                      | 8.6499                      | 8.6437                      | 8.6437                      | 8.6437                      | 8.6387                      | 124.4808                         | 124.4845                       | 124.4845                       | 124.4571                       | 124.4571                       | 124.4469                       | 124.4583                                    | -0.0128            | -0.0226               | 0.0133                            | 0.0726    | 3.75E-03                          | 0.3197          |
|      |              |            | Val129          | 8.8932                        | 8.8949                      | 8.8943                      | 8.8953                      | 8.8971                      | 8.8969                      | 8.9020                      | 129.9317                         | 129.9393                       | 129.9368                       | 129.9402                       | 129.9550                       | 129.9546                       | 129.9898                                    | 0.0088             | 0.0582                | 0.0125                            | 0.0726    | 1.82E-02                          | 1.5052          |
|      |              |            | Ser130          | 8.4312                        | 8.4296                      | 8.4300                      | 8.4271                      | 8.4289                      | 8.4278                      | 8.4257                      | 119.9143                         | 119.8999                       | 119.9017                       | 119.8891                       | 119.8948                       | 119.8950                       | 119.8962                                    | -0.0056            | -0.0181               | 0.0062                            | 0.0726    | 1.06E-05                          | 0.0129          |
|      |              |            | Leu131          | 9.2219                        | 9.2219                      | 9.2215                      | 9.2211                      | 9.2214                      | 9.2241                      | 9.2193                      | 132.0784                         | 132.0784                       | 132.1062                       | 132.1136                       | 132.1231                       | 132.1320                       | 132.1416                                    | -0.0025            | 0.0632                | 0.0100                            | 0.0726    | 5.24E-02                          | 4.0974          |

| Loop | Zinc lig. | BBL no. | CcrA residue | $\delta$ (ppm)                |                             |                             |                             |                             |                             |                             |                                  |                                |                                |                                |                                |                                |                                | $\Delta\delta_{\text{final-initial}}$ (ppm) |                       | CSP                               |                 | $K_d$ (M) | $\Delta\delta_{\text{max}}$ (ppm) |
|------|-----------|---------|--------------|-------------------------------|-----------------------------|-----------------------------|-----------------------------|-----------------------------|-----------------------------|-----------------------------|----------------------------------|--------------------------------|--------------------------------|--------------------------------|--------------------------------|--------------------------------|--------------------------------|---------------------------------------------|-----------------------|-----------------------------------|-----------------|-----------|-----------------------------------|
|      |           |         |              | $^1\text{H}_{\text{initial}}$ | $^1\text{H}_{\text{Step1}}$ | $^1\text{H}_{\text{Step2}}$ | $^1\text{H}_{\text{Step3}}$ | $^1\text{H}_{\text{Step4}}$ | $^1\text{H}_{\text{Step5}}$ | $^1\text{H}_{\text{final}}$ | $^{15}\text{N}_{\text{initial}}$ | $^{15}\text{N}_{\text{Step1}}$ | $^{15}\text{N}_{\text{Step2}}$ | $^{15}\text{N}_{\text{Step3}}$ | $^{15}\text{N}_{\text{Step4}}$ | $^{15}\text{N}_{\text{Step5}}$ | $^{15}\text{N}_{\text{final}}$ | $\Delta^1\text{H}$                          | $\Delta^{15}\text{N}$ | $\Delta^1\text{H}, ^{15}\text{N}$ | $\mu + 1\sigma$ |           |                                   |
|      |           |         | Asp132       | 8.8016                        | 8.8012                      | 8.8004                      | 8.8011                      | 8.8011                      | 8.8021                      | 8.7994                      | 127.0719                         | 127.0972                       | 127.1073                       | 127.1213                       | 127.1213                       | 127.1114                       | 127.1185                       | -0.0022                                     | 0.0465                | 0.0075                            | 0.0726          | 4.00E-05  | 0.0170                            |
|      |           |         | Gly133       | 7.1966                        | 7.1969                      | 7.1969                      | 7.1958                      | 7.1959                      | 7.1962                      | 7.1961                      | 101.8879                         | 101.8942                       | 101.8942                       | 101.8885                       | 101.8891                       | 101.8963                       | 101.8886                       | -0.0005                                     | 0.0007                | 0.0005                            | 0.0726          | 1.55E-03  | 0.0441                            |
|      |           |         | Met134       | 7.2748                        | 7.2746                      | 7.2754                      | 7.2760                      | 7.2760                      | 7.2756                      | 7.2761                      | 122.7181                         | 122.7317                       | 122.7272                       | 122.7375                       | 122.7375                       | 122.7275                       | 122.7377                       | 0.0013                                      | 0.0196                | 0.0033                            | 0.0726          | 7.73E-05  | 0.0128                            |
|      |           |         | Pro135       |                               |                             |                             |                             |                             |                             |                             |                                  |                                |                                |                                |                                |                                |                                |                                             |                       |                                   |                 |           |                                   |
|      |           |         | Leu136       | 8.9171                        | 8.9152                      | 8.9155                      | 8.9162                      | 8.9160                      | 8.9181                      | 8.9191                      | 123.3145                         | 123.2974                       | 123.2741                       | 123.3001                       | 123.2968                       | 123.2932                       | 123.3120                       | 0.0020                                      | -0.0025               | 0.0020                            | 0.0726          | 2.58E-05  | 0.0208                            |
|      |           |         | Gln137       | 8.9971                        | 9.0000                      | 9.0063                      | 9.0116                      | 9.0126                      | 9.0195                      | 9.0181                      | 120.9166                         | 120.9061                       | 120.9194                       | 120.9349                       | 120.9354                       | 120.9378                       | 120.9415                       | 0.0210                                      | 0.0250                | 0.0214                            | 0.0726          | 3.10E-07  | 0.0242                            |
|      |           |         | Cys138       | 8.8192                        | 8.8208                      | 8.8216                      | 8.8217                      | 8.8211                      | 8.8213                      | 8.8212                      | 123.3209                         | 123.2820                       | 123.2663                       | 123.2919                       | 123.2788                       | 123.2793                       | 123.2734                       | 0.0021                                      | -0.0475               | 0.0076                            | 0.0726          | 9.85E-06  | 0.0200                            |
|      |           |         | Tyr139       | 8.8652                        | 8.8629                      | 8.8621                      | 8.8665                      | 8.8662                      | 8.8672                      | 8.8696                      | 117.7277                         | 117.7369                       | 117.7574                       | 117.7671                       | 117.7634                       | 117.7706                       | 117.7664                       | 0.0044                                      | 0.0388                | 0.0074                            | 0.0726          | 1.02E-05  | 0.0170                            |
|      |           |         | Tyr140       | 9.1519                        | 9.1459                      | 9.1411                      | 9.1371                      | 9.1347                      | 9.1324                      | 9.1264                      | 121.0114                         | 120.9859                       | 120.9714                       | 120.9239                       | 120.9285                       | 120.9057                       | 120.8781                       | -0.0254                                     | -0.1333               | 0.0327                            | 0.0726          | 6.71E-05  | 0.0535                            |
|      |           |         | Leu141       | 9.4687                        | 9.4755                      | 9.4907                      | 9.5003                      | 9.5003                      | 9.5143                      | 9.5182                      | 129.4414                         | 129.4667                       | 129.4621                       | 129.4843                       | 129.4843                       | 129.5025                       | 129.5156                       | 0.0495                                      | 0.0743                | 0.0508                            | 0.0726          | 1.26E-05  | 0.0596                            |
|      |           |         | Gly142       |                               |                             |                             |                             |                             |                             |                             |                                  |                                |                                |                                |                                |                                |                                |                                             |                       |                                   |                 |           |                                   |
|      |           |         | Gly143       | 8.3485                        | 8.3432                      | 8.3382                      | 8.3321                      | 8.3321                      | 8.3305                      | 8.3247                      | 103.2277                         | 103.1913                       | 103.1446                       | 103.1195                       | 103.1195                       | 103.0815                       | 103.0652                       | -0.0238                                     | -0.1624               | 0.0345                            | 0.0726          | 2.88E-05  | 0.04628                           |
|      |           |         | Gly144       | 6.9776                        | 6.9898                      | 6.9881                      | 6.9949                      | 6.9865                      | 6.9883                      | 6.9928                      | 105.9083                         | 105.8958                       | 105.9230                       | 105.9298                       | 105.9242                       | 105.9712                       | 105.9769                       | 0.0151                                      | 0.0686                | 0.0185                            | 0.0726          | 8.49E-06  | 0.04818                           |
|      |           |         | Ala146       | 7.2753                        | 7.2757                      | 7.2796                      | 7.2695                      | 7.2663                      | 7.2631                      | 7.2588                      | 113.9539                         | 114.0894                       | 114.1105                       | 114.2454                       | 114.2436                       | 114.2839                       | 114.3299                       | -0.0165                                     | 0.3760                | 0.0602                            | 0.0726          | 9.08E-06  | 0.07652                           |
|      |           |         | Thr147       |                               |                             |                             |                             |                             |                             |                             |                                  |                                |                                |                                |                                |                                |                                |                                             |                       |                                   |                 |           |                                   |
|      |           |         | Asn149       | 6.9055                        | 6.8938                      | 6.8890                      | 6.8829                      | 6.8829                      | 6.8769                      | 6.8722                      | 115.5271                         | 115.5027                       | 115.5086                       | 115.5005                       | 115.5005                       | 115.4888                       | 115.4863                       | -0.0333                                     | -0.0408               | 0.0339                            | 0.0726          | 1.69E-05  | 0.0421                            |
|      |           |         | Ile150       |                               |                             |                             |                             |                             |                             |                             |                                  |                                |                                |                                |                                |                                |                                |                                             |                       |                                   |                 |           |                                   |
|      |           |         | Val151       | 8.4910                        | 8.4929                      | 8.4784                      | 8.4733                      | 8.4733                      | 8.4704                      | 8.4635                      | 105.2092                         | 105.1869                       | 105.1681                       | 105.0804                       | 105.0804                       | 105.0297                       | 105.0039                       | -0.0275                                     | -0.2054               | 0.0419                            | 0.0726          | 1.11E-05  | 0.0540                            |
|      |           |         | Val152       | 8.0980                        | 8.1087                      | 8.1137                      | 8.1157                      | 8.1198                      | 8.1202                      | 8.1244                      | 118.7815                         | 118.7040                       | 118.7069                       | 118.7059                       | 118.7000                       | 118.6966                       | 118.6883                       | 0.0263                                      | -0.0931               | 0.0300                            | 0.0726          | 1.54E-05  | 0.0419                            |
|      |           |         | Trp153       | 10.0502                       | 10.0492                     | 10.0499                     | 10.0480                     | 10.0480                     | 10.0506                     | 10.0465                     | 130.2890                         | 130.2627                       | 130.2580                       | 130.2538                       | 130.2538                       | 130.2507                       | 130.2212                       | -0.0038                                     | -0.0678               | 0.0111                            | 0.0726          | 1.87E-03  | 0.1578                            |
|      |           |         | Leu154       | 7.8773                        | 7.8842                      | 7.8787                      | 7.9015                      | 7.9027                      | 7.9072                      | 7.9122                      | 126.7846                         | 126.7477                       | 126.8117                       | 126.7747                       | 126.8038                       | 126.7762                       | 126.8290                       | 0.0349                                      | 0.0445                | 0.0355                            | 0.0726          | 3.77E-06  | 0.0654                            |
|      |           |         | Pro155       |                               |                             |                             |                             |                             |                             |                             |                                  |                                |                                |                                |                                |                                |                                |                                             |                       |                                   |                 |           |                                   |
|      |           |         | Thr156       | 8.3786                        | 8.3788                      | 8.3780                      | 8.3790                      | 8.3790                      | 8.3773                      | 8.3798                      | 106.8328                         | 106.8393                       | 106.8326                       | 106.8583                       | 106.8583                       | 106.8505                       | 106.8448                       | 0.0012                                      | 0.0120                | 0.0022                            | 0.0726          | 1.00E-03  | 0.0708                            |
|      |           |         | Glu157       | 6.7330                        | 6.7342                      | 6.7309                      | 6.7318                      | 6.7318                      | 6.7307                      | 6.7293                      | 116.1559                         | 116.1588                       | 116.1863                       | 116.2100                       | 116.1936                       | 116.2127                       | 116.2279                       | -0.0037                                     | 0.0719                | 0.0117                            | 0.0726          | 3.30E-06  | 0.0179                            |
|      |           |         | Asn158       | 7.6209                        | 7.6209                      | 7.6209                      | 7.6225                      | 7.6225                      | 7.6232                      | 7.6240                      | 113.5229                         | 113.5229                       | 113.5229                       | 113.5294                       | 113.5461                       | 113.5322                       | 113.5208                       | 0.0031                                      | -0.0022               | 0.0031                            | 0.0726          | 1.10E-02  | 0.5047                            |
|      |           |         | Ile159       | 6.2880                        | 6.2891                      | 6.2888                      | 6.2865                      | 6.2867                      | 6.2850                      | 6.2855                      | 115.4161                         | 115.4145                       | 115.4354                       | 115.4392                       | 115.4720                       | 115.4692                       | 115.4941                       | -0.0025                                     | 0.0779                | 0.0123                            | 0.0726          | 1.35E-03  | 0.1436                            |
|      |           |         | Leu160       | 8.7326                        | 8.7390                      | 8.7462                      | 8.7399                      | 8.7538                      | 8.7577                      | 8.7613                      | 128.4595                         | 128.4929                       | 128.5193                       | 128.5294                       | 128.5489                       | 128.5646                       | 128.5826                       | 0.0287                                      | 0.1231                | 0.0343                            | 0.0726          | 3.71E-07  | 0.0442                            |
|      |           |         | Phe161       | 9.8180                        | 9.8247                      | 9.8232                      | 9.8218                      | 9.8272                      | 9.8287                      | 9.8220                      | 127.9649                         | 128.0692                       | 128.0794                       | 128.1165                       | 128.0854                       | 128.0897                       | 128.1106                       | 0.0039                                      | 0.1458                | 0.0228                            | 0.0726          | 4.47E-02  | 5.6167                            |
|      |           |         | Gly163       |                               |                             |                             |                             |                             |                             |                             |                                  |                                |                                |                                |                                |                                |                                |                                             |                       |                                   |                 |           |                                   |
| L10  | Z2        | 221     | Cys164       |                               |                             |                             |                             |                             |                             |                             |                                  |                                |                                |                                |                                |                                |                                |                                             |                       |                                   |                 |           |                                   |
| L10  |           | 222     | Met165       |                               |                             |                             |                             |                             |                             |                             |                                  |                                |                                |                                |                                |                                |                                |                                             |                       |                                   |                 |           |                                   |
| L10  |           | 223     | Leu166       | 8.1337                        | 8.1491                      | 8.1509                      | 8.1550                      | 8.1702                      | 8.1805                      | 8.1478                      | 117.3756                         | 117.2584                       | 117.2706                       | 117.3440                       | 117.3822                       | 117.3510                       | 117.3822                       | 0.0141                                      | 0.0066                | 0.0141                            | 0.0726          |           |                                   |
| L10  |           | 225     | Asp168       |                               | 8.1618                      | 8.1654                      | 8.1663                      | 8.1685                      | 8.1725                      | 8.1719                      |                                  | 116.2462                       | 116.2314                       | 116.2182                       | 116.1637                       | 116.1781                       | 116.1225                       | 0.0101                                      | -0.1237               | 0.0215                            | 0.0726          | 2.48E-03  | 0.4547                            |
| L10  |           | 228     | Ala171       | 7.5314                        |                             |                             |                             |                             |                             | 7.5301                      | 124.3721                         |                                |                                |                                |                                |                                | 124.5774                       | -0.0013                                     | 0.2053                | 0.0316                            | 0.0726          | 3.22E-05  | 0.0415                            |
| L10  |           | 231     | Ile174       | 8.8215                        | 8.8291                      | 8.8283                      | 8.8281                      | 8.8278                      | 8.8272                      | 8.8253                      | 123.4484                         | 123.5892                       | 123.6458                       | 123.6758                       | 123.7112                       | 123.7317                       | 123.7377                       | 0.0038                                      | 0.2894                | 0.0447                            | 0.0726          | 1.61E-05  | 0.0638                            |
| L10  |           | 233     | Asn176       | 8.0066                        |                             |                             |                             |                             |                             | 7.9994                      | 124.2414                         |                                |                                |                                |                                |                                | 124.2530                       | -0.0072                                     | 0.0115                | 0.0075                            | 0.0726          | 3.52E-04  | 0.0281                            |
| L10  |           | 234     | Ile177       |                               |                             |                             |                             |                             |                             |                             |                                  |                                |                                |                                |                                |                                |                                |                                             |                       |                                   |                 |           |                                   |
| L10  |           | 235     | Ser178       | 8.2455                        | 8.2452                      | 8.2461                      | 8.2464                      |                             |                             |                             | 119.4541                         | 119.4005                       | 119.5020                       | 119.4580                       |                                |                                |                                |                                             |                       |                                   | 0.0726          | 5.57E-06  | 0.0548                            |

For cells colored in grey, the first titration points were used for estimating the  $^1\text{H}$  and  $^1\text{H}, ^{15}\text{N}$   $\Delta\delta$  since the initial data points were missing. The absolute values were not used in any further calculations, but the sign of the  $^1\text{H}$   $\Delta\delta$  were used in the DSCP analysis.

| Loop | Zinc lig. | BBL no. | CcrA residue | $\delta$ (ppm)                |                             |                             |                             |                             |                             |                             |                                  |                                |                                |                                |                                |                                | $\Delta\delta_{\text{final-initial}}$ (ppm) |                    | CSP (ppm)             |                                   | $K_d$ (M) | $\Delta\delta_{\text{max}}$ (ppm) |                 |
|------|-----------|---------|--------------|-------------------------------|-----------------------------|-----------------------------|-----------------------------|-----------------------------|-----------------------------|-----------------------------|----------------------------------|--------------------------------|--------------------------------|--------------------------------|--------------------------------|--------------------------------|---------------------------------------------|--------------------|-----------------------|-----------------------------------|-----------|-----------------------------------|-----------------|
|      |           |         |              | $^1\text{H}_{\text{initial}}$ | $^1\text{H}_{\text{Step1}}$ | $^1\text{H}_{\text{Step2}}$ | $^1\text{H}_{\text{Step3}}$ | $^1\text{H}_{\text{Step4}}$ | $^1\text{H}_{\text{Step5}}$ | $^1\text{H}_{\text{final}}$ | $^{15}\text{N}_{\text{initial}}$ | $^{15}\text{N}_{\text{Step1}}$ | $^{15}\text{N}_{\text{Step2}}$ | $^{15}\text{N}_{\text{Step3}}$ | $^{15}\text{N}_{\text{Step4}}$ | $^{15}\text{N}_{\text{Step5}}$ | $^{15}\text{N}_{\text{final}}$              | $\Delta^1\text{H}$ | $\Delta^{15}\text{N}$ | $\Delta^1\text{H}, ^{15}\text{N}$ |           |                                   | $\mu + 1\sigma$ |
| L10  |           | 236     | Asp179       | 7.9680                        |                             |                             |                             |                             |                             | 7.9652                      | 118.3175                         |                                |                                |                                |                                |                                | 118.2763                                    | -0.0028            | -0.0412               | 0.0069                            | 0.0726    | 1.46E-04                          | 0.0290          |
| L10  |           | 237     | Ala180       | 6.9305                        | 6.9241                      | 6.9149                      | 6.9067                      | 6.9067                      | 6.8959                      | 6.8875                      | 119.8914                         | 119.8838                       | 119.8682                       | 119.8689                       | 119.8689                       | 119.8734                       | 119.8752                                    | -0.0430            | -0.0162               | 0.0431                            | 0.0726    | 2.34E-04                          | 0.1095          |
| L10  |           | 238     | Asp181       | 8.0412                        | 8.0338                      | 8.0334                      | 8.0301                      | 8.0191                      | 8.0186                      | 8.0146                      | 119.4405                         | 119.4736                       | 119.5045                       | 119.5036                       | 119.5288                       | 119.5167                       | 119.5487                                    | -0.0266            | 0.1082                | 0.0314                            | 0.0726    | 3.27E-05                          | 0.0480          |
| L10  |           | 240     | Thr183       | 7.9145                        | 7.9169                      | 7.9202                      | 7.9230                      | 7.9239                      | 7.9260                      | 7.9281                      | 109.0618                         | 109.1301                       | 109.2063                       | 109.3063                       | 109.3411                       | 109.3832                       | 109.4339                                    | 0.0136             | 0.3720                | 0.0588                            | 0.0726    | 7.02E-06                          | 0.0627          |
| L10  |           | 241     | Ala184       | 7.4044                        | 7.4025                      | 7.3991                      | 7.3979                      | 7.3979                      | 7.3947                      | 7.3956                      | 122.1997                         | 122.2493                       | 122.2796                       | 122.3241                       | 122.3241                       | 122.3666                       | 122.3982                                    | -0.0088            | 0.1984                | 0.0318                            | 0.0726    | 3.98E-05                          | 0.0443          |
|      |           |         | Trp185       | 7.8303                        | 7.8226                      | 7.8165                      | 7.8060                      | 7.8006                      | 7.7992                      | 7.7934                      | 119.2511                         | 119.2226                       | 119.1863                       | 119.2139                       | 119.2038                       | 119.1965                       | 119.1775                                    | -0.0370            | -0.0736               | 0.0387                            | 0.0726    | 6.75E-06                          | 0.0466          |
|      |           |         | Pro186       |                               |                             |                             |                             |                             |                             |                             |                                  |                                |                                |                                |                                |                                |                                             |                    |                       |                                   | 0.0726    |                                   |                 |
|      |           |         | Lys187       | 7.0529                        | 7.0614                      | 7.0666                      | 7.0721                      | 7.0792                      | 7.0861                      | 7.0907                      | 116.6805                         | 116.6636                       | 116.5968                       | 116.5871                       | 116.5352                       | 116.5232                       | 116.4871                                    | 0.0379             | -0.1934               | 0.0481                            | 0.0726    | 1.54E-05                          | 0.0582          |
|      |           |         | Thr188       | 8.9899                        | 8.9982                      | 8.9985                      | 9.0438                      | 9.0424                      | 9.0509                      | 9.0529                      | 121.3942                         | 121.4022                       | 121.3574                       | 121.3903                       | 121.3917                       | 121.3781                       | 121.4293                                    | 0.0631             | 0.0351                | 0.0633                            | 0.0726    | 3.61E-06                          | 0.0839          |
|      |           |         | Leu189       | 8.3148                        | 8.3111                      | 8.3079                      | 8.3039                      | 8.3021                      | 8.3018                      | 8.2992                      | 119.4968                         | 119.5377                       | 119.5495                       | 119.5668                       | 119.5329                       | 119.5493                       | 119.5959                                    | -0.0155            | 0.0991                | 0.0217                            | 0.0726    | 1.50E-04                          | 0.0632          |
|      |           |         | Asp190       | 7.7812                        | 7.7726                      | 7.7601                      | 7.7528                      | 7.7485                      | 7.7451                      | 7.7381                      | 119.8310                         | 119.7999                       | 119.7896                       | 119.7668                       | 119.7698                       | 119.7570                       | 119.7483                                    | -0.0430            | -0.0827               | 0.0449                            | 0.0726    | 1.66E-05                          | 0.0562          |
|      |           |         | Lys191       | 7.8143                        | 7.8078                      | 7.8039                      | 7.7979                      | 7.7970                      | 7.7948                      | 7.7926                      | 121.5104                         | 121.5016                       | 121.4999                       | 121.4831                       | 121.4749                       | 121.4722                       | 121.4832                                    | -0.0217            | -0.0272               | 0.0221                            | 0.0726    | 8.81E-06                          | 0.0275          |
|      |           |         | Val192       | 8.2549                        | 8.2548                      | 8.2554                      | 8.2551                      | 8.2543                      | 8.2546                      | 8.2564                      | 120.8258                         | 120.8605                       | 120.8607                       | 120.8772                       | 120.8930                       | 120.9021                       | 120.9147                                    | 0.0015             | 0.0889                | 0.0138                            | 0.0726    | 3.43E-05                          | 0.0201          |
|      |           |         | Lys193       | 8.2973                        | 8.3006                      | 8.3017                      | 8.3035                      | 8.3035                      | 8.3046                      | 8.3042                      | 118.2002                         | 118.1911                       | 118.1834                       | 118.1849                       | 118.1849                       | 118.1812                       | 118.1794                                    | 0.0068             | -0.0208               | 0.0075                            | 0.0726    | 1.31E-05                          | 0.0112          |
|      |           |         | Ala194       | 7.4521                        | 7.4456                      | 7.4385                      | 7.4337                      | 7.4316                      | 7.4273                      | 7.4231                      | 116.7882                         | 116.7794                       | 116.7781                       | 116.7776                       | 116.7760                       | 116.7651                       | 116.7700                                    | -0.0290            | -0.0182               | 0.0291                            | 0.0726    | 2.16E-05                          | 0.0369          |
|      |           |         | Lys195       | 7.4117                        | 7.4090                      | 7.4080                      | 7.4080                      | 7.4074                      | 7.4079                      | 7.4086                      | 116.4771                         | 116.4548                       | 116.4425                       | 116.4335                       | 116.4324                       | 116.4300                       | 116.4350                                    | -0.0030            | -0.0421               | 0.0072                            | 0.0726    | 1.33E-05                          | 0.0130          |
|      |           |         | Phe196       | 6.7081                        | 6.7149                      | 6.7212                      | 6.7248                      | 6.7291                      | 6.7305                      | 6.7323                      | 113.4335                         | 113.4265                       | 113.4160                       | 113.4068                       | 113.4136                       | 113.3949                       | 113.3870                                    | 0.0242             | -0.0464               | 0.0252                            | 0.0726    | 5.67E-06                          | 0.0302          |
|      |           |         | Pro197       |                               |                             |                             |                             |                             |                             |                             |                                  |                                |                                |                                |                                |                                |                                             |                    |                       |                                   | 0.0726    |                                   |                 |
|      |           |         | Ser198       | 8.0734                        | 8.0815                      | 8.0854                      | 8.0901                      | 8.0880                      | 8.0895                      | 8.0963                      | 112.9940                         | 113.0051                       | 113.0063                       | 113.0139                       | 112.9989                       | 113.0095                       | 113.0158                                    | 0.0229             | 0.0218                | 0.0231                            | 0.0726    | 1.84E-02                          | 2.0003          |
|      |           |         | Ala199       | 7.2128                        | 7.2106                      | 7.2075                      | 7.2058                      | 7.2058                      | 7.2051                      | 7.2046                      | 123.3347                         | 123.3278                       | 123.3215                       | 123.3170                       | 123.3170                       | 123.3074                       | 123.3062                                    | -0.0083            | -0.0284               | 0.0093                            | 0.0726    | 1.11E-05                          | 0.0121          |
|      |           |         | Arg200       | 9.3448                        | 9.3452                      | 9.3476                      | 9.3487                      | 9.3539                      | 9.3539                      | 9.3620                      | 124.6809                         | 124.6609                       | 124.6556                       | 124.6451                       | 124.6509                       | 124.6423                       | 124.6509                                    | 0.0172             | -0.0300               | 0.0178                            | 0.0726    | 1.40E-02                          | 1.6127          |
|      |           |         | Tyr201       | 7.0744                        | 7.0712                      | 7.0668                      | 7.0636                      | 7.0693                      | 7.0687                      | 7.0644                      | 111.2985                         | 111.2770                       | 111.2565                       | 111.2116                       | 111.2505                       | 111.2403                       | 111.2266                                    | -0.0101            | -0.0720               | 0.0150                            | 0.0726    | 1.48E-06                          | 0.0310          |
|      |           |         | Val202       | 9.6530                        | 9.6567                      | 9.6547                      | 9.6608                      | 9.6596                      | 9.6616                      | 9.6659                      | 123.6452                         | 123.5992                       | 123.6049                       | 123.5788                       | 123.5666                       | 123.5468                       | 123.5483                                    | 0.0129             | -0.0968               | 0.0197                            | 0.0726    | 2.28E-05                          | 0.0341          |
|      |           |         | Val203       | 8.9168                        | 8.9147                      | 8.9024                      | 8.8930                      | 8.8865                      | 8.8899                      | 8.8835                      | 126.7731                         | 126.7268                       | 126.7183                       | 126.6944                       | 126.6577                       | 126.6527                       | 126.6493                                    | -0.0333            | -0.1238               | 0.0384                            | 0.0726    | 3.72E-06                          | 0.0503          |
|      |           |         | Pro204       |                               |                             |                             |                             |                             |                             |                             |                                  |                                |                                |                                |                                |                                |                                             |                    |                       |                                   |           |                                   |                 |
|      |           |         | Gly205       |                               |                             |                             |                             |                             |                             |                             |                                  |                                |                                |                                |                                |                                |                                             |                    |                       |                                   |           |                                   |                 |
| L12  | Z2        | 263     | His206       | 7.7302                        | 7.7327                      | 7.7326                      | 7.7325                      | 7.7353                      | 7.7378                      | 7.7386                      | 117.9304                         | 117.9357                       | 117.9465                       | 117.9341                       | 117.9431                       | 117.9478                       | 117.9364                                    | 0.0084             | 0.0060                | 0.0084                            | 0.0726    | 2.66E-04                          | 0.0383          |
| L12  |           | 264     | Gly207       | 9.5977                        |                             |                             |                             |                             |                             |                             | 111.3142                         |                                |                                |                                |                                |                                |                                             |                    |                       |                                   |           |                                   |                 |
|      |           |         | Tyr209       | 7.0483                        | 7.0638                      | 7.0416                      | 7.0366                      | 7.0638                      | 7.0495                      | 7.0560                      | 115.4016                         | 115.5348                       | 115.5003                       | 115.3339                       | 115.4085                       | 115.2535                       | 115.5176                                    | 0.0077             | 0.1159                | 0.0194                            | 0.0726    | 1.22E-03                          | 1.2673          |
|      |           |         | Gly210       | 8.2811                        | 8.2794                      | 8.2763                      | 8.2718                      | 8.2718                      | 8.2694                      | 8.2713                      | 109.2273                         | 109.1840                       | 109.1562                       | 109.1324                       | 109.1324                       | 109.1342                       | 109.1238                                    | -0.0098            | -0.1036               | 0.0187                            | 0.0726    | 1.26E-05                          | 0.0280          |
|      |           |         | Gly211       |                               | 9.4004                      | 9.3963                      | 9.3942                      | 9.3912                      | 9.3864                      | 9.3852                      |                                  | 116.1218                       | 116.0777                       | 116.0508                       | 115.9907                       | 115.9426                       | 115.9266                                    |                    |                       |                                   | 0.0726    | 2.13E-06                          | 0.0382          |
|      |           |         | Thr212       | 8.8243                        | 8.8242                      | 8.8226                      | 8.8226                      | 8.8226                      | 8.8226                      | 8.8224                      | 109.4000                         | 109.3613                       | 109.3317                       | 109.3135                       | 109.3135                       | 109.2779                       | 109.2421                                    | -0.0019            | -0.1579               | 0.0244                            | 0.0726    | 1.15E-04                          | 0.0438          |
|      |           |         | Glu213       | 10.1292                       | 10.1382                     | 10.1405                     | 10.1473                     | 10.1531                     | 10.1555                     | 10.1606                     | 126.9857                         | 127.0159                       | 127.0244                       | 127.0483                       | 127.0435                       | 127.0538                       | 127.0573                                    | 0.0314             | 0.0716                | 0.0333                            | 0.0726    | 1.28E-05                          | 0.0396          |
|      |           |         | Leu214       | 8.0177                        | 8.0188                      | 8.0161                      | 8.0179                      | 8.0167                      | 8.0153                      | 8.0142                      | 122.0073                         | 122.0014                       | 122.0163                       | 121.9936                       | 122.0112                       | 122.0284                       | 122.0347                                    | -0.0035            | 0.0274                | 0.0055                            | 0.0726    | 2.36E-06                          | 0.0163          |
|      |           |         | Ile215       | 8.1511                        | 8.1553                      | 8.1583                      | 8.1680                      | 8.1790                      | 8.1779                      | 8.1823                      | 121.4559                         | 121.4771                       | 121.4993                       | 121.5105                       | 121.5192                       | 121.5744                       | 121.5835                                    | 0.0312             | 0.1276                | 0.0369                            | 0.0726    | 4.49E-06                          | 0.0396          |
|      |           |         | His217       |                               |                             |                             |                             |                             |                             |                             |                                  |                                |                                |                                |                                |                                |                                             |                    |                       |                                   |           |                                   |                 |
|      |           |         | Thr218       |                               | 7.9430                      | 7.9460                      | 7.9478                      | 7.9488                      | 7.9506                      | 7.9526                      |                                  | 114.0613                       | 114.0469                       | 114.0367                       | 114.0398                       | 114.0294                       | 114.0135                                    |                    |                       |                                   | 0.0726    | 2.79E-05                          | 0.0956          |
|      |           |         | Lys219       | 8.0810                        | 8.0836                      | 8.0876                      | 8.0876                      | 8.0920                      | 8.0920                      | 8.0922                      | 122.1207                         | 122.0950                       | 122.0572                       | 122.0572                       | 122.0125                       | 122.0125                       | 121.9671                                    | 0.0111             | -0.1536               | 0.0261                            | 0.0726    | 1.18E-04                          | 0.0492          |

| Loop | Zinc<br>lig. | BBL<br>no. | CcrA<br>residue | $\delta$ (ppm)                |                             |                             |                             |                             |                             |                             |                                  |                                |                                |                                |                                |                                | $\Delta\delta_{\text{final-initial}}$ (ppm) |                    | CSP (ppm)             |                                   | $K_d$ (M) | $\Delta\delta_{\text{max}}$ (ppm) |                 |
|------|--------------|------------|-----------------|-------------------------------|-----------------------------|-----------------------------|-----------------------------|-----------------------------|-----------------------------|-----------------------------|----------------------------------|--------------------------------|--------------------------------|--------------------------------|--------------------------------|--------------------------------|---------------------------------------------|--------------------|-----------------------|-----------------------------------|-----------|-----------------------------------|-----------------|
|      |              |            |                 | $^1\text{H}_{\text{initial}}$ | $^1\text{H}_{\text{Step1}}$ | $^1\text{H}_{\text{Step2}}$ | $^1\text{H}_{\text{Step3}}$ | $^1\text{H}_{\text{Step4}}$ | $^1\text{H}_{\text{Step5}}$ | $^1\text{H}_{\text{final}}$ | $^{15}\text{N}_{\text{initial}}$ | $^{15}\text{N}_{\text{Step1}}$ | $^{15}\text{N}_{\text{Step2}}$ | $^{15}\text{N}_{\text{Step3}}$ | $^{15}\text{N}_{\text{Step4}}$ | $^{15}\text{N}_{\text{Step5}}$ | $^{15}\text{N}_{\text{final}}$              | $\Delta^1\text{H}$ | $\Delta^{15}\text{N}$ | $\Delta^1\text{H}, ^{15}\text{N}$ |           |                                   | $\mu + 1\sigma$ |
|      |              |            | Gln220          | 7.7876                        | 7.7723                      | 7.7576                      | 7.7481                      | 7.7416                      | 7.7316                      | 7.7238                      | 117.1533                         | 117.1466                       | 117.1260                       | 117.1168                       | 117.0976                       | 117.0813                       | 117.0689                                    | -0.0638            | -0.0844               | 0.0651                            | 0.0726    | 1.63E-05                          | 0.0789          |
|      |              |            | Ile221          | 7.3074                        | 7.3038                      | 7.3017                      | 7.3004                      | 7.3006                      | 7.2995                      | 7.2989                      | 119.1318                         | 119.2305                       | 119.3885                       | 119.4150                       | 119.5091                       | 119.5271                       | 119.6005                                    | -0.0085            | 0.4687                | 0.0726                            | 0.0726    | 1.54E-05                          | 0.0874          |
|      |              |            | Val222          | 8.0774                        | 8.0929                      | 8.1008                      | 8.1100                      | 8.1125                      | 8.1181                      | 8.1218                      | 121.3395                         | 121.3130                       | 121.2782                       | 121.2302                       | 121.2009                       | 121.1610                       | 121.1318                                    | 0.0444             | -0.2077               | 0.0547                            | 0.0726    | 1.11E-05                          | 0.0661          |
|      |              |            | Asn223          | 8.7284                        | 8.7205                      | 8.7171                      | 8.7127                      | 8.7095                      | 8.7080                      | 8.7061                      | 118.3258                         | 118.2847                       | 118.2580                       | 118.2376                       | 118.2087                       | 118.1872                       | 118.1775                                    | -0.0223            | -0.1483               | 0.0319                            | 0.0726    | 5.68E-06                          | 0.0362          |
|      |              |            | Gln224          | 8.1992                        | 8.2011                      | 8.2027                      | 8.2051                      | 8.2052                      | 8.2067                      | 8.2085                      | 119.8788                         | 119.8794                       | 119.8709                       | 119.8751                       | 119.8681                       | 119.8731                       | 119.8694                                    | 0.0094             | -0.0094               | 0.0095                            | 0.0726    | 4.76E-05                          | 0.0158          |
|      |              |            | Tyr225          | 7.8625                        | 7.8673                      | 7.8771                      | 7.8870                      | 7.8942                      | 7.8984                      | 7.9028                      | 122.0813                         | 122.1076                       | 122.1289                       | 122.1275                       | 122.1386                       | 122.1554                       | 122.1621                                    | 0.0403             | 0.0808                | 0.0422                            | 0.0726    | 1.75E-06                          | 0.0437          |
|      |              |            | Ile226          | 8.5245                        | 8.5267                      | 8.5282                      | 8.5309                      | 8.5333                      | 8.5334                      | 8.5368                      | 122.4016                         | 122.3947                       | 122.3919                       | 122.3934                       | 122.3876                       | 122.3920                       | 122.4113                                    | 0.0123             | 0.0097                | 0.0124                            | 0.0726    | 7.27E-04                          | 0.0715          |
|      |              |            | Glu227          | 8.3508                        | 8.3579                      | 8.3624                      | 8.3659                      | 8.3738                      | 8.3751                      | 8.3802                      | 119.7673                         | 119.7278                       | 119.7223                       | 119.7085                       | 119.7030                       | 119.7003                       | 119.6971                                    | 0.0295             | -0.0702               | 0.0314                            | 0.0726    | 1.44E-05                          | 0.0382          |
|      |              |            | Thr229          | 7.5014                        | 7.5033                      | 7.5042                      | 7.5048                      | 7.5029                      | 7.5048                      | 7.5048                      | 112.1329                         | 112.1270                       | 112.1195                       | 112.1151                       | 112.1121                       | 112.1061                       | 112.1002                                    | 0.0033             | -0.0328               | 0.0061                            | 0.0726    | 6.35E-05                          | 0.0145          |
|      |              |            | Ser230          | 7.6947                        | 7.6946                      | 7.6945                      | 7.6946                      | 7.6950                      | 7.6956                      | 7.6944                      | 117.4603                         | 117.4597                       | 117.4608                       | 117.4594                       | 117.4685                       | 117.4661                       | 117.4643                                    | -0.0004            | 0.0040                | 0.0007                            | 0.0726    | 2.36E-02                          | 0.5163          |
|      |              |            | Lys231          | 8.0066                        | 8.0043                      | 8.0036                      | 8.0026                      | 8.0034                      | 8.0029                      | 7.9995                      | 124.2415                         | 124.2443                       | 124.2498                       | 124.2493                       | 124.2526                       | 124.2528                       | 124.2527                                    | -0.0071            | 0.0112                | 0.0073                            | 0.0726    | 3.27E-04                          | 0.0265          |
|      |              |            | Pro232          |                               |                             |                             |                             |                             |                             |                             |                                  |                                |                                |                                |                                |                                |                                             |                    |                       |                                   |           |                                   |                 |

**Table S6.** Experimental  $^1\text{H}$ ,  $^{15}\text{N}$  HSQC titration data, and related calculated and fitted data for **6**. Residues displaying a significant chemical shift perturbation (i.e. CSP > 0.1306, where  $\mu$  and  $1\sigma$  were calculated to 0.658 and 0.648, respectively) are presented at the first page, and all other residues are presented thereafter. Active site residues are colored in orange, and those that are more likely to be involved in indirect than in direct interactions are colored in pale orange.

| Loop | Zinc lig. | BBL no. | CcrA residue | $\delta$ (ppm)                |                             |                             |                             |                             |                                  |                                |                                |                                |                                | $\Delta\delta_{\text{final-initial}}$ (ppm) |                       | CSP (ppm)                         |                 |
|------|-----------|---------|--------------|-------------------------------|-----------------------------|-----------------------------|-----------------------------|-----------------------------|----------------------------------|--------------------------------|--------------------------------|--------------------------------|--------------------------------|---------------------------------------------|-----------------------|-----------------------------------|-----------------|
|      |           |         |              | $^1\text{H}_{\text{initial}}$ | $^1\text{H}_{\text{Step1}}$ | $^1\text{H}_{\text{Step2}}$ | $^1\text{H}_{\text{Step3}}$ | $^1\text{H}_{\text{final}}$ | $^{15}\text{N}_{\text{initial}}$ | $^{15}\text{N}_{\text{Step1}}$ | $^{15}\text{N}_{\text{Step2}}$ | $^{15}\text{N}_{\text{Step3}}$ | $^{15}\text{N}_{\text{final}}$ | $\Delta^1\text{H}$                          | $\Delta^{15}\text{N}$ | $\Delta^1\text{H}, ^{15}\text{N}$ | $\mu + 1\sigma$ |
|      |           |         | Leu26        | 8.9784                        | 9.0242                      | 9.0255                      | 9.0304                      | 9.0329                      | 127.2751                         | 126.3012                       | 126.3244                       | 126.3769                       | 126.3793                       | 0.0545                                      | -0.8958               | 0.1482                            | 0.1306          |
| L3   |           | 64      | Trp32        | 8.4647                        | 8.6318                      | 8.6293                      | 8.6305                      | 8.6311                      | 120.3570                         | 120.0617                       | 120.0523                       | 120.0569                       | 120.0592                       | 0.1664                                      | -0.2978               | 0.1726                            | 0.1306          |
| L3   |           | 67      | Val35        | 8.9837                        | 9.1152                      | 9.1070                      | 9.0984                      | 9.0956                      | 128.3151                         | 130.0007                       | 129.9672                       | 130.0074                       | 130.0131                       | 0.1118                                      | 1.6981                | 0.2842                            | 0.1306          |
|      |           |         | Met40        | 9.2330                        |                             | 9.1910                      | 9.1585                      | 9.0930                      | 118.5854                         |                                | 118.3708                       | 118.3805                       | 118.6400                       | -0.1400                                     | 0.0546                | 0.1403                            | 0.1306          |
| L7   | Z1        | 116     | His82        | 7.6064                        | 7.4996                      | 7.4970                      | 7.4965                      | 7.4967                      | 106.2443                         | 105.0671                       | 105.0582                       | 105.0400                       | 105.0369                       | -0.1097                                     | -1.2074               | 0.2157                            | 0.1306          |
| L7   | Z1        | 118     | His84        | 5.4744                        | 5.4471                      | 5.3553                      | 5.3569                      | 5.3557                      | 113.6192                         | 113.2985                       | 112.2517                       | 112.2278                       | 112.2409                       | -0.1187                                     | -1.3782               | 0.2430                            | 0.1306          |
| >L7  |           | 121     | Cys87        | 7.8090                        | 7.6071                      | 7.6039                      | 7.6049                      | 7.6044                      | 112.9643                         | 114.8644                       | 114.8592                       | 114.8516                       | 114.8604                       | -0.2047                                     | 1.8961                | 0.3563                            | 0.1306          |
| >L7  |           | 123     | Gly89        | 8.2227                        | 8.3923                      | 8.3946                      | 8.3970                      | 8.3941                      | 112.8046                         | 113.3026                       | 113.2738                       | 113.2475                       | 113.2667                       | 0.1714                                      | 0.4621                | 0.1855                            | 0.1306          |
|      |           |         | Gly90        | 8.5690                        | 8.3184                      | 8.3134                      | 8.3071                      | 8.2994                      | 107.4157                         | 107.6050                       | 107.6451                       | 107.6351                       | 107.6600                       | -0.2696                                     | 0.2443                | 0.2722                            | 0.1306          |
|      |           |         | Tyr93        | 7.3240                        | 7.3263                      | 7.6160                      | 7.6157                      | 7.6182                      | 122.1432                         | 122.1703                       | 122.9412                       | 122.9269                       | 122.9239                       | 0.2941                                      | 0.7807                | 0.3177                            | 0.1306          |
|      |           |         | Gln100       | 8.0973                        | 8.2510                      | 8.2503                      | 8.2515                      | 8.2517                      | 127.3836                         | 127.1946                       | 127.1752                       | 127.2131                       | 127.1918                       | 0.1544                                      | -0.1919               | 0.1572                            | 0.1306          |
|      |           |         | Asp125       | 9.0442                        |                             |                             |                             | 8.8258                      | 121.3444                         |                                |                                |                                | 121.3101                       | -0.2184                                     | -0.0344               | 0.2184                            | 0.1306          |
| L9   | Z1        | 196     | His145       | 5.7465                        | 5.6702                      | 5.6666                      | 5.6676                      | 5.6701                      | 130.5256                         | 129.7834                       | 129.8003                       | 129.8086                       | 129.8090                       | -0.0764                                     | -0.7167               | 0.1341                            | 0.1306          |
|      |           |         | Ala146       | 7.3241                        | 7.1571                      | 7.1559                      | 7.1559                      | 7.1567                      | 114.2178                         | 114.3569                       | 114.3568                       | 114.3720                       | 114.3631                       | -0.1673                                     | 0.1454                | 0.1688                            | 0.1306          |
|      |           |         | Asp148       | 10.5003                       | 10.7376                     | 10.7361                     | 10.7420                     | 10.7403                     | 115.0988                         | 116.2152                       | 116.1966                       | 116.2249                       | 116.2059                       | 0.2400                                      | 1.1072                | 0.2943                            | 0.1306          |
|      |           |         | Leu154       | 7.8410                        | 7.8541                      | 7.9687                      | 7.9712                      | 7.9700                      | 126.6575                         | 126.6312                       | 126.8982                       | 126.8971                       | 126.9000                       | 0.1290                                      | 0.2425                | 0.1343                            | 0.1306          |
|      |           |         | Gly162       | 8.2977                        | 8.5871                      | 8.5792                      | 8.5827                      | 8.5819                      | 112.6972                         | 111.7240                       | 111.7287                       | 111.7035                       | 111.6966                       | 0.2841                                      | -1.0007               | 0.3232                            | 0.1306          |
| L10  |           | 226     | Asn169       | 8.6978                        | 8.8282                      | 8.8270                      | 8.8251                      | 8.8223                      | 115.2862                         | 115.9084                       | 115.9117                       | 115.8987                       | 115.8936                       | 0.1245                                      | 0.6074                | 0.1557                            | 0.1306          |
| L10  |           | 230     | Ser173       | 7.7068                        | 7.8720                      | 7.8739                      | 7.8734                      | 7.8720                      | 115.3047                         | 115.7933                       | 115.7781                       | 115.7704                       | 115.7819                       | 0.1651                                      | 0.4772                | 0.1807                            | 0.1306          |
| L10  |           | 232     | Gly175       | 8.0540                        | 8.2352                      | 8.2349                      | 8.2352                      | 8.2355                      | 111.0300                         | 111.9134                       | 111.9289                       | 111.9330                       | 111.9360                       | 0.1815                                      | 0.9060                | 0.2289                            | 0.1306          |
|      |           |         | Lys187       | 7.0498                        | 7.0607                      | 7.1129                      | 7.1134                      | 7.1127                      | 116.7613                         | 116.6562                       | 115.9057                       | 115.8931                       | 115.8750                       | 0.0630                                      | -0.8863               | 0.1502                            | 0.1306          |
|      |           |         | Gly211       | 9.4564                        | 9.3300                      | 9.3358                      | 9.3363                      | 9.3367                      | 116.6530                         | 115.3092                       | 115.3370                       | 115.3313                       | 115.3311                       | -0.1197                                     | -1.3220               | 0.2360                            | 0.1306          |

| Loop | Zinc lig. | BBL no. | CcrA residue | $\delta$ (ppm)                |                             |                             |                             |                             |                                  |                                |                                |                                |                                | $\Delta\delta_{\text{final-initial}}$ (ppm) |                       | CSP (ppm)                         |                 |
|------|-----------|---------|--------------|-------------------------------|-----------------------------|-----------------------------|-----------------------------|-----------------------------|----------------------------------|--------------------------------|--------------------------------|--------------------------------|--------------------------------|---------------------------------------------|-----------------------|-----------------------------------|-----------------|
|      |           |         |              | $^1\text{H}_{\text{initial}}$ | $^1\text{H}_{\text{Step1}}$ | $^1\text{H}_{\text{Step2}}$ | $^1\text{H}_{\text{Step3}}$ | $^1\text{H}_{\text{final}}$ | $^{15}\text{N}_{\text{initial}}$ | $^{15}\text{N}_{\text{Step1}}$ | $^{15}\text{N}_{\text{Step2}}$ | $^{15}\text{N}_{\text{Step3}}$ | $^{15}\text{N}_{\text{final}}$ | $\Delta^1\text{H}$                          | $\Delta^{15}\text{N}$ | $\Delta^1\text{H}, ^{15}\text{N}$ | $\mu + 1\sigma$ |
|      |           |         | Lys3         | 8.5318                        | 8.5307                      | 8.5270                      | 8.5277                      | 8.5275                      | 123.2710                         | 123.2547                       | 123.2416                       | 123.2565                       | 123.2576                       | -0.0043                                     | -0.0134               | 0.0048                            | 0.1306          |
|      |           |         | Ser4         | 8.2775                        | 8.2594                      | 8.2540                      | 8.2539                      | 8.2538                      | 118.2911                         | 118.2216                       | 118.2082                       | 118.2007                       | 118.1984                       | -0.0236                                     | -0.0927               | 0.0276                            | 0.1306          |
|      |           |         | Val5         | 9.1165                        | 9.1057                      | 9.0997                      | 9.1013                      | 9.1003                      | 122.9815                         | 123.0647                       | 123.0783                       | 123.0828                       | 123.0828                       | -0.0163                                     | 0.1013                | 0.0225                            | 0.1306          |
|      |           |         | Lys6         | 8.6068                        | 8.6019                      | 8.5995                      | 8.5990                      | 8.5991                      | 126.7389                         | 126.8992                       | 126.9292                       | 126.9308                       | 126.9301                       | -0.0077                                     | 0.1912                | 0.0304                            | 0.1306          |
|      |           |         | Ile7         | 7.9697                        | 7.9736                      | 7.9739                      | 7.9733                      | 7.9739                      | 122.7620                         | 122.9145                       | 123.0135                       | 123.1419                       | 123.1339                       | 0.0042                                      | 0.3719                | 0.0574                            | 0.1306          |
|      |           |         | Ser8         | 8.3892                        | 8.3951                      | 8.3975                      | 8.3997                      | 8.3992                      | 115.1889                         | 115.1875                       | 115.1946                       | 115.1864                       | 115.1869                       | 0.0100                                      | -0.0020               | 0.0100                            | 0.1306          |
|      |           |         | Asp9         | 8.8056                        | 8.7970                      | 8.7876                      | 8.8127                      | 8.8249                      | 117.5024                         | 117.5731                       | 117.5575                       | 117.6110                       | 117.6485                       | 0.0193                                      | 0.1462                | 0.0296                            | 0.1306          |
|      |           |         | Asp10        | 8.3743                        | 8.2992                      | 8.2992                      | 8.3034                      | 8.3048                      | 112.9090                         | 113.1979                       | 113.2058                       | 113.1824                       | 113.1870                       | -0.0695                                     | 0.2780                | 0.0816                            | 0.1306          |
|      |           |         | Ile11        | 7.1642                        | 7.1204                      | 7.1198                      | 7.1199                      | 7.1211                      | 118.4852                         | 118.1453                       | 118.1458                       | 118.1547                       | 118.1612                       | -0.0431                                     | -0.3241               | 0.0659                            | 0.1306          |
|      |           |         | Ser12        | 8.6722                        | 8.6697                      | 8.6682                      | 8.6685                      | 8.6694                      | 121.8596                         | 121.8677                       | 121.8720                       | 121.8760                       | 121.8783                       | -0.0028                                     | 0.0187                | 0.0040                            | 0.1306          |
|      |           |         | Ile13        | 9.1842                        | 9.1385                      | 9.1346                      | 9.1373                      | 9.1361                      | 121.7920                         | 121.5632                       | 121.5429                       | 121.5429                       | 121.5433                       | -0.0481                                     | -0.2487               | 0.0615                            | 0.1306          |
|      |           |         | Thr14        | 9.2894                        | 9.2847                      | 9.2751                      | 9.2760                      | 9.2744                      | 122.8880                         | 122.8623                       | 122.8807                       | 122.8734                       | 122.8890                       | -0.0150                                     | 0.0010                | 0.0150                            | 0.1306          |
|      |           |         | Gln15        | 9.0304                        | 8.9825                      | 8.9815                      | 8.9830                      | 8.9834                      | 129.4815                         | 129.1286                       | 129.1335                       | 129.1299                       | 129.1314                       | -0.0471                                     | -0.3500               | 0.0715                            | 0.1306          |
|      |           |         | Leu16        | 8.6347                        | 8.7610                      | 8.7608                      | 8.7603                      | 8.7616                      | 126.7446                         | 126.8980                       | 126.9084                       | 126.9050                       | 126.8973                       | 0.1269                                      | 0.1527                | 0.1291                            | 0.1306          |
|      |           |         | Ser17        | 8.4400                        | 8.4345                      | 8.4280                      | 8.4286                      | 8.4274                      | 115.3195                         | 115.2520                       | 115.2214                       | 115.2252                       | 115.2210                       | -0.0126                                     | -0.0985               | 0.0197                            | 0.1306          |
|      |           |         | Asp18        | 8.5453                        |                             |                             |                             | 8.5789                      | 116.4061                         |                                |                                |                                | 116.7610                       | 0.0336                                      | 0.3549                | 0.0641                            | 0.1306          |
|      |           |         | Lys19        | 7.5396                        | 7.5588                      | 7.5585                      | 7.5603                      | 7.5595                      | 113.7767                         | 113.9217                       | 113.9433                       | 113.9539                       | 113.9566                       | 0.0199                                      | 0.1799                | 0.0341                            | 0.1306          |
|      |           |         | Val20        | 7.0012                        | 6.9924                      | 6.9878                      | 6.9874                      | 6.9873                      | 116.1046                         | 116.1515                       | 116.1717                       | 116.1658                       | 116.1709                       | -0.0139                                     | 0.0663                | 0.0172                            | 0.1306          |
|      |           |         | Tyr21        | 9.5381                        | 9.5274                      | 9.5237                      | 9.5238                      | 9.5250                      | 126.3165                         | 126.4059                       | 126.4412                       | 126.4511                       | 126.4497                       | -0.0131                                     | 0.1332                | 0.0243                            | 0.1306          |
|      |           |         | Thr22        | 9.5266                        | 9.4557                      | 9.4548                      | 9.4533                      | 9.4545                      | 115.6314                         | 115.2164                       | 115.2073                       | 115.2340                       | 115.2304                       | -0.0721                                     | -0.4009               | 0.0949                            | 0.1306          |
|      |           |         | Tyr23        | 8.1091                        | 8.0733                      | 8.0727                      | 8.0718                      | 8.0731                      | 124.2151                         | 123.8230                       | 123.8257                       | 123.8364                       | 123.8348                       | -0.0359                                     | -0.3803               | 0.0687                            | 0.1306          |
|      |           |         | Val24        | 8.8775                        | 8.9306                      | 8.9254                      | 8.9272                      | 8.9274                      | 120.8391                         | 120.9861                       | 120.9850                       | 120.9934                       | 120.9883                       | 0.0499                                      | 0.1492                | 0.0550                            | 0.1306          |
|      |           |         | Ser25        | 9.7447                        |                             |                             |                             | 9.6713                      | 122.3444                         |                                |                                |                                | 122.4001                       | -0.0734                                     | 0.0557                | 0.0739                            | 0.1306          |
|      |           |         | Ala27        | 8.0419                        |                             |                             |                             | 8.0303                      | 124.8189                         |                                |                                |                                | 125.6587                       | -0.0116                                     | 0.8398                | 0.1297                            | 0.1306          |
| L3   |           | 60      | Glu28        | 8.4583                        | 8.4500                      | 8.4510                      | 8.4578                      | 8.4576                      | 122.1250                         | 121.9765                       | 121.9760                       | 121.9691                       | 121.9624                       | -0.0007                                     | -0.1627               | 0.0250                            | 0.1306          |
| L3   |           | 61      | Ile29        | 8.5449                        |                             |                             |                             | 8.5155                      | 127.1663                         |                                |                                |                                | 126.5559                       | -0.0294                                     | -0.6104               | 0.0984                            | 0.1306          |
| L3   |           | 62      | Glu30        | 8.9258                        | 9.0044                      | 9.0034                      | 9.0055                      | 9.0061                      | 130.2056                         | 130.5055                       | 130.5045                       | 130.4982                       | 130.4979                       | 0.0803                                      | 0.2923                | 0.0921                            | 0.1306          |
| L3   |           | 63      | Gly31        | 8.8436                        | 8.8435                      | 8.8445                      | 8.8439                      | 8.8432                      | 114.8769                         | 115.4402                       | 115.4502                       | 115.4477                       | 115.4569                       | -0.0005                                     | 0.5800                | 0.0892                            | 0.1306          |
| L3   |           | 65      | Gly33        | 8.3092                        | 8.2688                      | 8.2657                      | 8.2670                      | 8.2662                      | 108.9241                         | 109.6468                       | 109.6445                       | 109.6373                       | 109.6459                       | -0.0430                                     | 0.7218                | 0.1191                            | 0.1306          |
| L3   |           | 66      | Met34        | 8.3977                        | 8.3787                      | 8.3754                      | 8.3780                      | 8.3790                      | 121.2224                         | 121.2547                       | 121.2859                       | 121.3026                       | 121.3007                       | -0.0187                                     | 0.0784                | 0.0223                            | 0.1306          |
| L3   |           | 68      | Pro36        |                               |                             |                             |                             |                             |                                  |                                |                                |                                |                                |                                             |                       |                                   | 0.1306          |
| L3   |           | 69      | Ser37        | 9.3608                        |                             |                             |                             | 9.4378                      | 121.6023                         |                                |                                |                                | 122.1341                       | 0.0770                                      | 0.5318                | 0.1124                            | 0.1306          |
|      |           |         | Asn38        | 7.9430                        |                             |                             |                             | 7.9540                      | 119.6954                         |                                |                                |                                | 119.5504                       | 0.0111                                      | -0.1450               | 0.0249                            | 0.1306          |
|      |           |         | Gly39        | 6.5328                        |                             |                             |                             |                             | 102.7400                         |                                |                                |                                |                                |                                             |                       |                                   | 0.1306          |
|      |           |         | Ile41        | 9.1409                        | 9.1299                      | 9.0895                      | 9.0936                      | 9.0948                      | 122.1751                         | 122.1048                       | 122.0185                       | 122.0371                       | 122.0376                       | -0.0461                                     | -0.1375               | 0.0507                            | 0.1306          |
|      |           |         | Val42        | 9.0511                        | 9.0440                      | 9.0417                      | 9.0431                      | 9.0419                      | 128.3958                         | 128.1481                       | 128.1291                       | 128.1513                       | 128.1410                       | -0.0092                                     | -0.2547               | 0.0402                            | 0.1306          |
|      |           |         | Ile43        | 9.3040                        | 9.3124                      | 9.3108                      | 9.3350                      | 9.3390                      | 124.6463                         | 124.6194                       | 124.5863                       | 124.6017                       | 124.5954                       | 0.0351                                      | -0.0509               | 0.0359                            | 0.1306          |
|      |           |         | Asn44        | 8.7257                        | 8.6856                      | 8.6854                      | 8.6834                      | 8.6811                      | 119.5177                         | 119.1967                       | 119.2008                       | 119.1992                       | 119.1826                       | -0.0447                                     | -0.3351               | 0.0682                            | 0.1306          |
|      |           |         | Asn45        | 8.9372                        | 8.9279                      | 8.9212                      | 8.9199                      | 8.9186                      | 124.9894                         | 124.9654                       | 124.9562                       | 124.9432                       | 124.9463                       | -0.0186                                     | -0.0431               | 0.0198                            | 0.1306          |
|      |           |         | His46        | 8.7988                        |                             |                             |                             | 8.8040                      | 108.6530                         |                                |                                |                                | 108.5321                       | 0.0051                                      | -0.1208               | 0.0193                            | 0.1306          |
|      |           |         | Gln47        | 8.2160                        | 8.2186                      | 8.2180                      | 8.2178                      | 8.2177                      | 121.0867                         | 121.1306                       | 121.1595                       | 121.1464                       | 121.1504                       | 0.0017                                      | 0.0637                | 0.0100                            | 0.1306          |
|      |           |         | Ala48        | 8.9912                        | 8.9835                      | 8.9535                      | 8.9560                      | 8.9534                      | 121.7027                         | 121.6435                       | 121.6104                       | 121.6181                       | 121.6223                       | -0.0378                                     | -0.0803               | 0.0397                            | 0.1306          |

| Loop | Zinc lig. | BBL no. | CcrA residue | $\delta$ (ppm)                |                             |                             |                             |                             |                                  |                                |                                |                                |                                | $\Delta\delta_{\text{final-initial}}$ (ppm) |                       | CSP (ppm)                         |                 |
|------|-----------|---------|--------------|-------------------------------|-----------------------------|-----------------------------|-----------------------------|-----------------------------|----------------------------------|--------------------------------|--------------------------------|--------------------------------|--------------------------------|---------------------------------------------|-----------------------|-----------------------------------|-----------------|
|      |           |         |              | $^1\text{H}_{\text{initial}}$ | $^1\text{H}_{\text{Step1}}$ | $^1\text{H}_{\text{Step2}}$ | $^1\text{H}_{\text{Step3}}$ | $^1\text{H}_{\text{final}}$ | $^{15}\text{N}_{\text{initial}}$ | $^{15}\text{N}_{\text{Step1}}$ | $^{15}\text{N}_{\text{Step2}}$ | $^{15}\text{N}_{\text{Step3}}$ | $^{15}\text{N}_{\text{final}}$ | $\Delta^1\text{H}$                          | $\Delta^{15}\text{N}$ | $\Delta^1\text{H}, ^{15}\text{N}$ | $\mu + 1\sigma$ |
|      |           |         | Ala49        | 9.6288                        | 9.6336                      | 9.6248                      | 9.6248                      | 9.6248                      | 122.1911                         | 122.2169                       | 122.2269                       | 122.2269                       | 122.2269                       | -0.0040                                     | 0.0358                | 0.0068                            | 0.1306          |
|      |           |         | Leu50        | 8.6836                        | 8.6836                      | 8.6823                      | 8.6833                      | 8.6823                      | 122.6188                         | 122.6188                       | 122.6188                       | 122.6273                       | 122.6230                       | -0.0013                                     | 0.0042                | 0.0015                            | 0.1306          |
|      |           |         | Leu51        | 9.1926                        | 9.1795                      | 9.1837                      | 9.1857                      | 9.1866                      | 127.2274                         | 127.2141                       | 127.0914                       | 127.0682                       | 126.9522                       | -0.0060                                     | -0.2751               | 0.0428                            | 0.1306          |
|      |           |         | Asp52        | 7.2900                        | 7.2771                      | 7.2782                      | 7.2808                      | 7.2792                      | 111.5975                         | 111.6144                       | 111.7074                       | 111.6525                       | 111.6187                       | -0.0108                                     | 0.0211                | 0.0113                            | 0.1306          |
|      |           |         | Thr53        | 8.1375                        | 8.1276                      | 8.1401                      | 8.1166                      |                             | 111.7885                         | 111.8023                       | 111.7508                       | 111.7361                       |                                |                                             |                       |                                   | 0.1306          |
|      |           |         | Pro54        |                               |                             |                             |                             |                             |                                  |                                |                                |                                |                                |                                             |                       |                                   | 0.1306          |
| L5   |           | 87      | Ile55        | 7.8453                        | 7.9201                      | 7.9181                      | 7.9282                      | 7.9298                      | 111.6209                         | 111.1777                       | 111.1893                       | 111.2203                       | 111.2215                       | 0.0845                                      | -0.3994               | 0.1045                            | 0.1306          |
|      |           |         | Asn56        | 6.7395                        | 6.7422                      | 6.7465                      | 6.7619                      | 6.7764                      | 111.1737                         | 111.0967                       | 111.0728                       | 111.0387                       | 111.0523                       | 0.0368                                      | -0.1214               | 0.0413                            | 0.1306          |
|      |           |         | Asp57        | 8.9699                        | 8.9545                      | 8.9532                      | 8.9634                      | 8.9569                      | 122.2955                         | 122.2362                       | 122.2700                       | 122.7396                       | 122.8260                       | -0.0130                                     | 0.5305                | 0.0827                            | 0.1306          |
|      |           |         | Ala58        | 8.2144                        | 8.2114                      | 8.2138                      | 8.2097                      | 8.2138                      | 125.1639                         | 125.1747                       | 125.2014                       | 125.2065                       | 125.2014                       | -0.0006                                     | 0.0375                | 0.0058                            | 0.1306          |
|      |           |         | Gln59        | 8.8409                        | 8.9624                      | 8.9608                      | 8.9632                      | 8.9620                      | 116.8716                         | 116.6684                       | 116.6708                       | 116.6434                       | 116.6579                       | 0.1211                                      | -0.2137               | 0.1255                            | 0.1306          |
|      |           |         | Thr60        | 7.3214                        | 7.3246                      | 7.2967                      | 7.2992                      | 7.3046                      | 115.9851                         | 115.9343                       | 116.0205                       | 115.9973                       | 115.9741                       | -0.0169                                     | -0.0110               | 0.0170                            | 0.1306          |
|      |           |         | Glu61        | 8.1920                        | 8.1952                      | 8.1902                      | 8.1927                      | 8.1933                      | 123.0741                         | 123.0808                       | 123.1010                       | 123.0960                       | 123.1516                       | 0.0014                                      | 0.0776                | 0.0120                            | 0.1306          |
|      |           |         | Met62        | 7.2826                        | 7.2845                      | 7.2951                      | 7.2972                      | 7.2973                      | 117.1445                         | 117.1662                       | 117.1936                       | 117.1952                       | 117.1975                       | 0.0147                                      | 0.0530                | 0.0168                            | 0.1306          |
|      |           |         | Leu63        | 7.6247                        | 7.5516                      | 7.5501                      | 7.5483                      | 7.5479                      | 119.6844                         | 120.0081                       | 119.9927                       | 119.9959                       | 120.0047                       | -0.0768                                     | 0.3203                | 0.0913                            | 0.1306          |
|      |           |         | Val64        | 8.7682                        | 8.7410                      | 8.7377                      | 8.7344                      | 8.7338                      | 119.0547                         | 118.7298                       | 118.7364                       | 118.7232                       | 118.7251                       | -0.0344                                     | -0.3295               | 0.0613                            | 0.1306          |
|      |           |         | Asn65        | 8.8906                        | 8.8901                      | 8.8912                      | 8.8935                      | 8.8930                      | 120.3815                         | 120.4576                       | 120.5920                       | 120.5993                       | 120.5993                       | 0.0025                                      | 0.2178                | 0.0336                            | 0.1306          |
|      |           |         | Trp66        | 7.8060                        | 7.8025                      | 7.8008                      | 7.8017                      | 7.8008                      | 122.0978                         | 122.2813                       | 122.3087                       | 122.3087                       | 122.3033                       | -0.0052                                     | 0.2055                | 0.0320                            | 0.1306          |
|      |           |         | Val67        | 8.4193                        | 8.4470                      | 8.4466                      | 8.4407                      | 8.4414                      | 120.7662                         | 120.7249                       | 120.7057                       | 120.7331                       | 120.7064                       | 0.0221                                      | -0.0599               | 0.0239                            | 0.1306          |
|      |           |         | Thr68        | 8.1706                        | 8.1886                      | 8.1855                      | 8.1804                      | 8.1786                      | 114.9653                         | 115.3851                       | 115.3966                       | 115.4012                       | 115.4284                       | 0.0080                                      | 0.4631                | 0.0717                            | 0.1306          |
|      |           |         | Asp69        | 8.4143                        | 8.4721                      | 8.4686                      | 8.4705                      | 8.4699                      | 120.3078                         | 120.4707                       | 120.4723                       | 120.4799                       | 120.4752                       | 0.0557                                      | 0.1674                | 0.0613                            | 0.1306          |
|      |           |         | Ser70        | 8.4682                        | 8.4635                      | 8.4571                      | 8.4597                      | 8.4609                      | 112.6374                         | 112.5946                       | 112.5899                       | 112.5774                       | 112.5854                       | -0.0073                                     | -0.0519               | 0.0108                            | 0.1306          |
|      |           |         | Leu71        | 6.5889                        | 6.5684                      | 6.5633                      | 6.5645                      | 6.5626                      | 115.3292                         | 115.2749                       | 115.2884                       | 115.3059                       | 115.3111                       | -0.0264                                     | -0.0181               | 0.0265                            | 0.1306          |
|      |           |         | His72        | 6.7521                        | 6.7508                      | 6.7535                      | 6.7521                      | 6.7532                      | 112.8975                         | 112.9659                       | 113.0100                       | 113.0387                       | 113.0387                       | 0.0011                                      | 0.1412                | 0.0217                            | 0.1306          |
|      |           |         | Ala73        | 7.3454                        |                             |                             |                             | 7.3517                      | 119.6117                         |                                |                                |                                | 119.6420                       | 0.0063                                      | 0.0303                | 0.0078                            | 0.1306          |
|      |           |         | Lys74        | 7.6558                        | 7.6580                      | 7.6813                      | 7.6846                      | 7.6834                      | 119.2987                         | 119.2968                       | 119.2456                       | 119.2390                       | 119.2523                       | 0.0276                                      | -0.0464               | 0.0285                            | 0.1306          |
|      |           |         | Val75        | 8.9146                        | 8.9127                      | 8.9185                      | 8.9221                      | 8.9209                      | 126.6710                         | 126.6851                       | 126.8148                       | 126.8294                       | 126.8211                       | 0.0064                                      | 0.1501                | 0.0240                            | 0.1306          |
|      |           |         | Thr76        | 9.1846                        | 9.2891                      | 9.2884                      | 9.2901                      | 9.2874                      | 117.3351                         | 117.2851                       | 117.3077                       | 117.2928                       | 117.3060                       | 0.1028                                      | -0.0291               | 0.1029                            | 0.1306          |
|      |           |         | Thr77        | 7.7021                        | 7.7698                      | 7.7692                      | 7.7686                      | 7.7672                      | 120.3873                         | 120.5600                       | 120.5746                       | 120.5762                       | 120.5673                       | 0.0651                                      | 0.1800                | 0.0708                            | 0.1306          |
|      |           |         | Phe78        | 9.1377                        | 9.1439                      | 9.1417                      | 9.1423                      | 9.1449                      | 127.2176                         | 126.9968                       | 126.9400                       | 126.9477                       | 126.9305                       | 0.0072                                      | -0.2871               | 0.0448                            | 0.1306          |
|      |           |         | Ile79        | 7.5021                        | 7.4952                      | 7.5536                      | 7.5562                      | 7.5538                      | 126.7415                         | 126.7685                       | 127.0489                       | 127.0483                       | 127.0440                       | 0.0517                                      | 0.3025                | 0.0695                            | 0.1306          |
|      |           |         | Pro80        |                               |                             |                             |                             |                             |                                  |                                |                                |                                |                                |                                             |                       |                                   | 0.1306          |
|      |           |         | Asp81        |                               |                             |                             |                             |                             |                                  |                                |                                |                                |                                |                                             |                       |                                   | 0.1306          |
| L7   |           | 117     | Trp83        | 8.4067                        | 8.3106                      | 8.3101                      | 8.3088                      | 8.3091                      | 115.4090                         | 115.7605                       | 115.7515                       | 115.7490                       | 115.7471                       | -0.0976                                     | 0.3382                | 0.1106                            | 0.1306          |
| >L7  |           | 119     | Gly85        | 8.8484                        |                             |                             |                             | 8.8467                      | 112.0618                         |                                |                                |                                | 112.0928                       | -0.0017                                     | 0.0310                | 0.0051                            | 0.1306          |
| >L7  | Z2        | 120     | Asp86        |                               |                             |                             |                             |                             |                                  |                                |                                |                                |                                |                                             |                       |                                   | 0.1306          |
| >L7  |           | 122     | Leu88        | 7.4591                        |                             |                             |                             | 7.4146                      | 109.8561                         |                                |                                |                                | 110.3930                       | -0.0445                                     | 0.5369                | 0.0938                            | 0.1306          |

| Loop | Zinc lig. | BBL no. | CcrA residue | $\delta$ (ppm)                |                             |                             |                             |                             |                                  |                                |                                |                                |                                | $\Delta\delta_{\text{final-initial}}$ (ppm) |                       | CSP (ppm)                         |                 |
|------|-----------|---------|--------------|-------------------------------|-----------------------------|-----------------------------|-----------------------------|-----------------------------|----------------------------------|--------------------------------|--------------------------------|--------------------------------|--------------------------------|---------------------------------------------|-----------------------|-----------------------------------|-----------------|
|      |           |         |              | $^1\text{H}_{\text{initial}}$ | $^1\text{H}_{\text{Step1}}$ | $^1\text{H}_{\text{Step2}}$ | $^1\text{H}_{\text{Step3}}$ | $^1\text{H}_{\text{final}}$ | $^{15}\text{N}_{\text{initial}}$ | $^{15}\text{N}_{\text{Step1}}$ | $^{15}\text{N}_{\text{Step2}}$ | $^{15}\text{N}_{\text{Step3}}$ | $^{15}\text{N}_{\text{final}}$ | $\Delta^1\text{H}$                          | $\Delta^{15}\text{N}$ | $\Delta^1\text{H}, ^{15}\text{N}$ | $\mu + 1\sigma$ |
|      |           |         | Leu91        | 7.9117                        | 7.9170                      | 7.9104                      | 7.9010                      | 7.8997                      | 120.9584                         | 120.8788                       | 120.8819                       | 120.8697                       | 120.8735                       | -0.0120                                     | -0.0849               | 0.0178                            | 0.1306          |
|      |           |         | Gly92        | 9.2237                        | 9.1875                      | 9.1871                      | 9.1777                      | 9.1812                      | 108.5815                         | 109.2282                       | 109.2109                       | 109.1997                       | 109.1655                       | -0.0425                                     | 0.5840                | 0.0994                            | 0.1306          |
|      |           |         | Leu94        | 7.2045                        | 7.2032                      | 7.1898                      | 7.1967                      | 7.2044                      | 115.6817                         | 115.5872                       | 115.7070                       | 115.6453                       | 115.6178                       | -0.0001                                     | -0.0639               | 0.0098                            | 0.1306          |
|      |           |         | Gln95        | 8.6436                        | 8.7254                      | 8.7228                      | 8.7249                      | 8.7276                      | 118.3321                         | 118.3268                       | 118.2845                       | 118.3056                       | 118.3225                       | 0.0840                                      | -0.0096               | 0.0840                            | 0.1306          |
|      |           |         | Arg96        | 7.6723                        | 7.6730                      | 7.6898                      | 7.6895                      | 7.6894                      | 120.6601                         | 120.6204                       | 120.5306                       | 120.5199                       | 120.5195                       | 0.0171                                      | -0.1406               | 0.0276                            | 0.1306          |
|      |           |         | Lys97        | 7.2072                        | 7.2012                      | 7.2009                      | 7.2015                      | 7.2018                      | 116.8044                         | 116.7184                       | 116.6346                       | 116.6491                       | 116.6400                       | -0.0054                                     | -0.1645               | 0.0259                            | 0.1306          |
|      |           |         | Gly98        | 7.7082                        | 7.7154                      | 7.7183                      | 7.7177                      | 7.7187                      | 107.9680                         | 107.9062                       | 107.8837                       | 107.8776                       | 107.8813                       | 0.0104                                      | -0.0867               | 0.0169                            | 0.1306          |
|      |           |         | Val99        | 7.5266                        | 7.5287                      | 7.4811                      | 7.4821                      | 7.4819                      | 121.2033                         | 121.1995                       | 120.9139                       | 120.9252                       | 120.9213                       | -0.0447                                     | -0.2821               | 0.0623                            | 0.1306          |
|      |           |         | Ser101       | 8.2250                        | 8.2156                      | 8.2859                      | 8.2982                      | 8.3058                      | 115.9294                         | 115.9007                       | 116.1128                       | 116.1351                       | 116.1718                       | 0.0808                                      | 0.2424                | 0.0890                            | 0.1306          |
|      |           |         | Tyr102       | 8.6382                        | 8.5629                      | 8.5660                      | 8.5650                      | 8.5705                      | 121.9260                         | 122.2004                       | 122.2247                       | 122.2085                       | 122.2234                       | -0.0677                                     | 0.2974                | 0.0817                            | 0.1306          |
|      |           |         | Ala103       | 8.9678                        | 8.9584                      | 8.9353                      | 8.9385                      | 8.9405                      | 117.3377                         | 117.3171                       | 117.2972                       | 117.2957                       | 117.2785                       | -0.0273                                     | -0.0592               | 0.0288                            | 0.1306          |
|      |           |         | Asn104       | 8.5230                        | 8.5104                      | 8.5081                      | 8.5098                      | 8.5097                      | 118.1783                         | 118.6897                       | 118.7038                       | 118.6930                       | 118.6919                       | -0.0133                                     | 0.5137                | 0.0801                            | 0.1306          |
|      |           |         | Gln105       | 9.4835                        | 9.4835                      | 9.5608                      | 9.5601                      | 9.5617                      | 132.1770                         | 132.1770                       | 132.2677                       | 132.2761                       | 132.2726                       | 0.0782                                      | 0.0956                | 0.0796                            | 0.1306          |
|      |           |         | Met106       | 7.3917                        | 7.3783                      | 7.3790                      | 7.3448                      | 7.3442                      | 112.9073                         | 112.8967                       | 112.9112                       | 113.0180                       | 112.9495                       | -0.0476                                     | 0.0422                | 0.0480                            | 0.1306          |
|      |           |         | Thr107       | 7.1170                        | 7.0946                      | 7.0919                      | 7.0919                      | 7.0922                      | 116.1972                         | 116.3082                       | 116.3292                       | 116.3082                       | 116.3151                       | -0.0248                                     | 0.1179                | 0.0307                            | 0.1306          |
|      |           |         | Ile108       | 7.2278                        | 7.2365                      | 7.2377                      | 7.2387                      | 7.2375                      | 121.6911                         | 121.5589                       | 121.5211                       | 121.5301                       | 121.5222                       | 0.0097                                      | -0.1690               | 0.0278                            | 0.1306          |
|      |           |         | Asp109       |                               |                             |                             |                             |                             |                                  |                                |                                |                                |                                |                                             |                       |                                   | 0.1306          |
|      |           |         | Leu110       | 7.6412                        | 7.6670                      | 7.6673                      | 7.6683                      | 7.6691                      | 121.7263                         | 121.6785                       | 121.6852                       | 121.6787                       | 121.6903                       | 0.0279                                      | -0.0360               | 0.0285                            | 0.1306          |
|      |           |         | Ala111       | 8.4715                        | 8.6000                      | 8.5976                      | 8.5986                      | 8.5995                      | 121.6340                         | 121.7804                       | 121.7669                       | 121.7561                       | 121.7610                       | 0.1280                                      | 0.1269                | 0.1295                            | 0.1306          |
|      |           |         | Lys112       | 8.4218                        | 8.4141                      | 8.3841                      | 8.3799                      | 8.3953                      | 116.3597                         | 116.3379                       | 116.1657                       | 116.3675                       | 116.1747                       | -0.0264                                     | -0.1850               | 0.0388                            | 0.1306          |
|      |           |         | Glu113       | 7.6510                        | 7.6324                      | 7.5646                      | 7.5639                      | 7.5639                      | 119.6356                         | 119.6335                       | 119.4183                       | 119.4181                       | 119.4178                       | -0.0871                                     | -0.2178               | 0.0933                            | 0.1306          |
|      |           |         | Lys114       | 7.7694                        | 7.7651                      | 7.7650                      | 7.7650                      | 7.7635                      | 115.8771                         | 115.5424                       | 115.5255                       | 115.5287                       | 115.5253                       | -0.0058                                     | -0.3518               | 0.0544                            | 0.1306          |
|      |           |         | Gly115       | 7.7145                        | 7.7368                      | 7.7351                      | 7.7343                      | 7.7367                      | 108.6677                         | 108.3974                       | 108.3865                       | 108.3840                       | 108.3797                       | 0.0221                                      | -0.2880               | 0.0495                            | 0.1306          |
| L8   |           | 168     | Leu116       | 8.0801                        | 8.0791                      | 8.0762                      | 8.0791                      | 8.0785                      | 122.7023                         | 123.1176                       | 123.0920                       | 123.1153                       | 123.1059                       | -0.0015                                     | 0.4036                | 0.0621                            | 0.1306          |
|      |           |         | Pro117       |                               |                             |                             |                             |                             |                                  |                                |                                |                                |                                |                                             |                       |                                   | 0.1306          |
|      |           |         | Val118       |                               |                             |                             |                             |                             |                                  |                                |                                |                                |                                |                                             |                       |                                   | 0.1306          |
|      |           |         | Pro119       |                               |                             |                             |                             |                             |                                  |                                |                                |                                |                                |                                             |                       |                                   | 0.1306          |
|      |           |         | Glu120       |                               |                             |                             |                             |                             |                                  |                                |                                |                                |                                |                                             |                       |                                   | 0.1306          |
|      |           |         | His121       | 7.6836                        | 7.6777                      | 7.6235                      | 7.6277                      | 7.6282                      | 116.3066                         | 116.3148                       | 116.3354                       | 116.4096                       | 116.4261                       | -0.0554                                     | 0.1195                | 0.0584                            | 0.1306          |
|      |           |         | Gly122       | 8.6322                        | 8.6291                      | 8.6245                      | 8.6223                      | 8.6192                      | 111.2094                         | 111.1816                       | 111.1586                       | 111.1260                       | 111.1221                       | -0.0131                                     | -0.0873               | 0.0187                            | 0.1306          |
|      |           |         | Phe123       | 7.6749                        | 7.6805                      | 7.6787                      | 7.6771                      | 7.6775                      | 115.1775                         | 115.2414                       | 115.2502                       | 115.2513                       | 115.2438                       | 0.0027                                      | 0.0663                | 0.0105                            | 0.1306          |
|      |           |         | Thr124       | 8.6498                        | 8.6501                      | 8.6673                      | 8.6683                      | 8.6693                      | 112.3355                         | 112.3874                       | 112.7490                       | 112.7624                       | 112.7666                       | 0.0195                                      | 0.4311                | 0.0691                            | 0.1306          |
|      |           |         | Ser126       | 8.9119                        | 8.9374                      | 8.9363                      | 8.9347                      | 8.9352                      | 115.1962                         | 115.4602                       | 115.4568                       | 115.4702                       | 115.4630                       | 0.0233                                      | 0.2668                | 0.0472                            | 0.1306          |
|      |           |         | Leu127       | 7.6659                        | 7.6483                      | 7.6458                      | 7.6476                      | 7.6457                      | 121.2219                         | 121.0016                       | 120.9680                       | 120.9683                       | 120.9583                       | -0.0202                                     | -0.2636               | 0.0453                            | 0.1306          |
|      |           |         | Thr128       | 8.6560                        | 8.6453                      | 8.6245                      | 8.6266                      | 8.6230                      | 124.5670                         | 124.5749                       | 124.2269                       | 124.2301                       | 124.2326                       | -0.0330                                     | -0.3343               | 0.0611                            | 0.1306          |
|      |           |         | Val129       | 8.8725                        | 8.8779                      | 8.9269                      | 8.9272                      | 8.9276                      | 129.9158                         | 129.9623                       | 130.2847                       | 130.2898                       | 130.2773                       | 0.0550                                      | 0.3615                | 0.0782                            | 0.1306          |
|      |           |         | Ser130       | 8.4379                        | 8.4330                      | 8.4326                      | 8.4331                      | 8.4340                      | 119.9105                         | 119.9453                       | 119.9742                       | 119.9858                       | 119.9790                       | -0.0040                                     | 0.0685                | 0.0113                            | 0.1306          |
|      |           |         | Leu131       | 9.2088                        | 9.2069                      | 9.2051                      | 9.2035                      | 9.2045                      | 132.0113                         | 132.1652                       | 132.2077                       | 132.2118                       | 132.2083                       | -0.0043                                     | 0.1970                | 0.0306                            | 0.1306          |

| Loop | Zinc lig. | BBL no. | CcrA residue | $\delta$ (ppm)                |                            |                            |                            |                             |                                  |                               |                               |                               |                                | $\Delta\delta_{\text{final-initial}}$ (ppm) |                       | CSP (ppm)                         |                 |
|------|-----------|---------|--------------|-------------------------------|----------------------------|----------------------------|----------------------------|-----------------------------|----------------------------------|-------------------------------|-------------------------------|-------------------------------|--------------------------------|---------------------------------------------|-----------------------|-----------------------------------|-----------------|
|      |           |         |              | $^1\text{H}_{\text{initial}}$ | $^1\text{H}_{\text{Sep1}}$ | $^1\text{H}_{\text{Sep2}}$ | $^1\text{H}_{\text{Sep3}}$ | $^1\text{H}_{\text{final}}$ | $^{15}\text{N}_{\text{initial}}$ | $^{15}\text{N}_{\text{Sep1}}$ | $^{15}\text{N}_{\text{Sep2}}$ | $^{15}\text{N}_{\text{Sep3}}$ | $^{15}\text{N}_{\text{final}}$ | $\Delta^1\text{H}$                          | $\Delta^{15}\text{N}$ | $\Delta^1\text{H}, ^{15}\text{N}$ | $\mu + 1\sigma$ |
|      |           |         | Asp132       | 8.8074                        | 8.7991                     | 8.7991                     | 8.7991                     | 8.7991                      | 127.2251                         | 127.1665                      | 127.1665                      | 127.1665                      | 127.1665                       | -0.0083                                     | -0.0586               | 0.0123                            | 0.1306          |
|      |           |         | Gly133       | 7.1939                        | 7.1946                     | 7.1936                     | 7.1936                     | 7.1943                      | 101.9010                         | 101.9055                      | 101.9084                      | 101.9014                      | 101.9082                       | 0.0004                                      | 0.0072                | 0.0012                            | 0.1306          |
|      |           |         | Met134       | 7.2883                        | 7.2799                     | 7.2733                     | 7.2729                     | 7.2718                      | 122.7818                         | 122.7575                      | 122.7419                      | 122.7490                      | 122.7404                       | -0.0165                                     | -0.0413               | 0.0177                            | 0.1306          |
|      |           |         | Pro135       |                               |                            |                            |                            |                             |                                  |                               |                               |                               |                                |                                             |                       |                                   | 0.1306          |
|      |           |         | Leu136       | 8.9102                        | 8.9153                     | 8.9605                     | 8.9607                     | 8.9620                      | 123.2380                         | 123.2486                      | 123.6302                      | 123.5981                      | 123.6095                       | 0.0518                                      | 0.3715                | 0.0771                            | 0.1306          |
|      |           |         | Gln137       | 8.9740                        | 8.9900                     | 8.9900                     | 8.9971                     | 8.9981                      | 120.8740                         | 120.9044                      | 120.9882                      | 121.0339                      | 121.0225                       | 0.0240                                      | 0.1485                | 0.0332                            | 0.1306          |
|      |           |         | Cys138       | 8.8177                        | 8.8163                     | 8.8165                     | 8.8180                     | 8.8186                      | 123.3206                         | 123.2953                      | 123.2899                      | 123.2939                      | 123.2930                       | 0.0009                                      | -0.0276               | 0.0043                            | 0.1306          |
|      |           |         | Tyr139       | 8.8621                        | 8.8621                     | 8.8955                     | 8.8984                     | 8.8952                      | 117.7577                         | 117.7577                      | 117.7896                      | 117.7662                      | 117.7700                       | 0.0331                                      | 0.0123                | 0.0331                            | 0.1306          |
|      |           |         | Tyr140       | 9.1514                        | 9.1373                     | 9.0949                     | 9.0961                     | 9.0956                      | 120.9559                         | 120.9124                      | 120.6531                      | 120.6493                      | 120.6531                       | -0.0558                                     | -0.3028               | 0.0727                            | 0.1306          |
|      |           |         | Leu141       | 9.4798                        | 9.4798                     | 9.5463                     | 9.5493                     | 9.5501                      | 129.5080                         | 129.5080                      | 129.5257                      | 129.5265                      | 129.5383                       | 0.0704                                      | 0.0303                | 0.0705                            | 0.1306          |
|      |           |         | Gly142       |                               |                            |                            |                            |                             |                                  |                               |                               |                               |                                |                                             |                       |                                   | 0.1306          |
|      |           |         | Gly143       | 8.3402                        | 8.3302                     | 8.2675                     | 8.2677                     | 8.2666                      | 103.2255                         | 103.1787                      | 102.6638                      | 102.6660                      | 102.6597                       | -0.0736                                     | -0.5657               | 0.1140                            | 0.1306          |
|      |           |         | Gly144       | 7.0296                        | 7.0491                     | 7.0510                     | 7.0513                     | 7.0515                      | 105.9098                         | 105.4748                      | 105.4786                      | 105.4729                      | 105.4847                       | 0.0219                                      | -0.4252               | 0.0690                            | 0.1306          |
|      |           |         | Thr147       |                               |                            |                            |                            |                             |                                  |                               |                               |                               |                                |                                             |                       |                                   | 0.1306          |
|      |           |         | Asn149       | 6.8914                        | 6.8084                     | 6.8067                     | 6.8056                     | 6.8063                      | 115.5307                         | 115.6106                      | 115.6241                      | 115.6307                      | 115.6258                       | -0.0851                                     | 0.0950                | 0.0864                            | 0.1306          |
|      |           |         | Ile150       |                               |                            |                            |                            |                             |                                  |                               |                               |                               |                                |                                             |                       |                                   | 0.1306          |
|      |           |         | Val151       | 8.4931                        | 8.4892                     | 8.4881                     | 8.4845                     | 8.4854                      | 105.2321                         | 105.4355                      | 105.4696                      | 105.4332                      | 105.4242                       | -0.0078                                     | 0.1922                | 0.0306                            | 0.1306          |
|      |           |         | Val152       | 8.1107                        | 8.1107                     | 8.1111                     | 8.1057                     | 8.1082                      | 118.6095                         | 118.6095                      | 118.5203                      | 118.5636                      | 118.5163                       | -0.0026                                     | -0.0932               | 0.0146                            | 0.1306          |
|      |           |         | Trp153       | 10.0410                       | 10.0412                    | 10.0385                    | 10.0377                    | 10.0403                     | 130.2486                         | 130.2135                      | 130.2146                      | 130.2155                      | 130.2091                       | -0.0008                                     | -0.0395               | 0.0061                            | 0.1306          |
|      |           |         | Pro155       |                               |                            |                            |                            |                             |                                  |                               |                               |                               |                                |                                             |                       |                                   | 0.1306          |
|      |           |         | Thr156       | 8.3842                        | 8.3896                     | 8.3892                     | 8.3870                     | 8.3890                      | 106.9182                         | 106.8685                      | 106.8543                      | 106.8516                      | 106.8492                       | 0.0047                                      | -0.0690               | 0.0116                            | 0.1306          |
|      |           |         | Glu157       | 6.7398                        | 6.7241                     | 6.7205                     | 6.7217                     | 6.7210                      | 116.1469                         | 116.1666                      | 116.1670                      | 116.1611                      | 116.1624                       | -0.0188                                     | 0.0156                | 0.0190                            | 0.1306          |
|      |           |         | Asn158       | 7.6090                        | 7.6090                     | 7.6573                     | 7.6548                     | 7.6564                      | 113.5178                         | 113.5178                      | 113.5665                      | 113.5844                      | 113.5699                       | 0.0474                                      | 0.0520                | 0.0481                            | 0.1306          |
|      |           |         | Ile159       | 6.2903                        | 6.2874                     | 6.2772                     | 6.2774                     | 6.2776                      | 115.2921                         | 115.3460                      | 115.6699                      | 115.6674                      | 115.6708                       | -0.0128                                     | 0.3788                | 0.0597                            | 0.1306          |
|      |           |         | Leu160       | 8.7206                        | 8.7632                     | 8.7641                     | 8.7647                     | 8.7635                      | 128.3726                         | 128.7139                      | 128.7179                      | 128.7249                      | 128.7125                       | 0.0429                                      | 0.3399                | 0.0676                            | 0.1306          |
|      |           |         | Phe161       | 9.8301                        | 9.8379                     | 9.8371                     | 9.8383                     | 9.8385                      | 128.4630                         | 128.2759                      | 128.2657                      | 128.2664                      | 128.2685                       | 0.0084                                      | -0.1945               | 0.0311                            | 0.1306          |
|      |           |         | Gly163       |                               | 5.5819                     | 5.5796                     | 5.5775                     | 5.5757                      |                                  | 100.6371                      | 100.6476                      | 100.5988                      | 100.6509                       |                                             |                       |                                   | 0.1306          |
| L10  | Z2        | 221     | Cys164       | 6.5187                        |                            |                            |                            |                             | 119.8041                         |                               |                               |                               |                                |                                             |                       |                                   | 0.1306          |
| L10  |           | 222     | Met165       |                               |                            |                            |                            |                             |                                  |                               |                               |                               |                                |                                             |                       |                                   | 0.1306          |
| L10  |           | 223     | Leu166       | 8.1331                        | 8.1816                     | 8.1809                     | 8.1777                     | 8.1767                      | 117.8598                         | 117.5157                      | 117.5110                      | 117.5300                      | 117.4912                       | 0.0436                                      | -0.3686               | 0.0715                            | 0.1306          |
| L10  |           | 224     | Lys167       | 8.7982                        | 8.8382                     | 8.8381                     | 8.8376                     | 8.8360                      | 120.8235                         | 120.2534                      | 120.2497                      | 120.2572                      | 120.2426                       | 0.0377                                      | -0.5809               | 0.0970                            | 0.1306          |
| L10  |           | 225     | Asp168       | 8.0834                        | 8.0899                     | 8.0835                     | 8.0802                     | 8.0770                      | 115.8952                         | 115.8003                      | 115.3465                      | 115.3135                      | 115.2930                       | -0.0064                                     | -0.6022               | 0.0929                            | 0.1306          |
| L10  |           | 227     | Gln170       |                               | 8.0396                     | 8.1425                     |                            | 8.1392                      |                                  | 115.3214                      | 115.0984                      |                               | 115.1017                       | 0.0996                                      | -0.2197               | 0.1052                            | 0.1306          |
| L10  |           | 228     | Ala171       | 7.5853                        |                            |                            |                            | 7.5230                      | 124.5345                         |                               |                               |                               | 124.5580                       | -0.0623                                     | 0.0234                | 0.0624                            | 0.1306          |
| L10  |           | 229     | Thr172       | 7.1141                        | 7.0293                     | 7.0323                     | 7.0282                     | 7.0210                      | 118.1707                         | 117.6962                      | 117.7238                      | 117.7557                      | 117.7073                       | -0.0930                                     | -0.4634               | 0.1172                            | 0.1306          |
| L10  |           | 231     | Ile174       | 8.8496                        |                            | 8.8898                     | 8.8897                     | 8.8888                      | 123.4975                         |                               | 124.0342                      | 124.0088                      | 124.0140                       | 0.0391                                      | 0.5165                | 0.0886                            | 0.1306          |
| L10  |           | 233     | Asn176       | 7.9827                        |                            |                            |                            | 7.9832                      | 124.2414                         |                               |                               |                               | 124.2492                       | 0.0005                                      | 0.0078                | 0.0013                            | 0.1306          |
| L10  |           | 234     | Ile177       | 8.7570                        | 8.8887                     | 8.7656                     | 8.7684                     | 8.7690                      | 122.0402                         | 124.0319                      | 122.8273                      | 122.8283                      | 122.8050                       | 0.0120                                      | 0.7648                | 0.1183                            | 0.1306          |

For cells colored in grey, the first titration points were used for estimating the  $^1\text{H}$  and  $^1\text{H}, ^{15}\text{N}$   $\Delta\delta$  since the initial data points were missing.

The absolute values were not used in any further calculations, but the sign of the  $^1\text{H}$   $\Delta\delta$  were used in the DSCP analysis.

| Loop | Zinc lig. | BBL no. | CcrA residue | $\delta$ (ppm)                |                             |                             |                             |                             |                                  |                                |                                |                                |                                | $\Delta\delta_{\text{final-initial}}$ (ppm) |                       | CSP (ppm)                         |                 |
|------|-----------|---------|--------------|-------------------------------|-----------------------------|-----------------------------|-----------------------------|-----------------------------|----------------------------------|--------------------------------|--------------------------------|--------------------------------|--------------------------------|---------------------------------------------|-----------------------|-----------------------------------|-----------------|
|      |           |         |              | $^1\text{H}_{\text{initial}}$ | $^1\text{H}_{\text{Step1}}$ | $^1\text{H}_{\text{Step2}}$ | $^1\text{H}_{\text{Step3}}$ | $^1\text{H}_{\text{final}}$ | $^{15}\text{N}_{\text{initial}}$ | $^{15}\text{N}_{\text{Step1}}$ | $^{15}\text{N}_{\text{Step2}}$ | $^{15}\text{N}_{\text{Step3}}$ | $^{15}\text{N}_{\text{final}}$ | $\Delta^1\text{H}$                          | $\Delta^{15}\text{N}$ | $\Delta^1\text{H}, ^{15}\text{N}$ | $\mu + 1\sigma$ |
| L10  |           | 235     | Ser178       | 8.2774                        | 8.1984                      | 8.1976                      | 8.2015                      | 8.2027                      | 119.5550                         | 119.1778                       | 119.1964                       | 119.1915                       | 119.1952                       | -0.0747                                     | -0.3598               | 0.0930                            | 0.1306          |
| L10  |           | 236     | Asp179       | 8.1671                        |                             |                             |                             | 8.1344                      | 118.4370                         |                                |                                |                                | 118.5083                       | -0.0328                                     | 0.0713                | 0.0345                            | 0.1306          |
| L10  |           | 237     | Ala180       | 6.9431                        | 6.8630                      | 6.8609                      | 6.8617                      | 6.8615                      | 119.9289                         | 120.0243                       | 120.0248                       | 120.0198                       | 120.0395                       | -0.0816                                     | 0.1106                | 0.0833                            | 0.1306          |
| L10  |           | 238     | Asp181       | 8.0809                        | 8.0914                      | 8.0922                      | 8.0864                      | 8.0859                      | 119.4655                         | 119.2379                       | 119.2307                       | 119.2600                       | 119.2726                       | 0.0050                                      | -0.1929               | 0.0301                            | 0.1306          |
| L10  |           | 239     | Val182       | 8.5420                        | 8.5257                      | 8.5253                      | 8.5082                      | 8.5260                      | 120.7008                         | 120.5113                       | 120.5114                       | 120.4746                       | 120.6217                       | -0.0160                                     | -0.0791               | 0.0201                            | 0.1306          |
| L10  |           | 240     | Thr183       | 7.9103                        | 7.9177                      | 7.9190                      | 7.9190                      | 7.9191                      | 109.1765                         | 109.1689                       | 109.1458                       | 109.1458                       | 109.1442                       | 0.0089                                      | -0.0323               | 0.0102                            | 0.1306          |
| L10  |           | 241     | Ala184       | 7.4079                        | 7.3906                      | 7.3863                      | 7.3874                      | 7.3862                      | 122.2079                         | 122.2731                       | 122.2795                       | 122.2825                       | 122.2852                       | -0.0217                                     | 0.0773                | 0.0247                            | 0.1306          |
|      |           |         | Trp185       | 7.8385                        | 7.9131                      | 7.9115                      | 7.9111                      | 7.9105                      | 119.2191                         | 118.9302                       | 118.9267                       | 118.9287                       | 118.9259                       | 0.0720                                      | -0.2932               | 0.0849                            | 0.1306          |
|      |           |         | Pro186       |                               |                             |                             |                             |                             |                                  |                                |                                |                                |                                |                                             |                       |                                   | 0.1306          |
|      |           |         | Thr188       | 9.0471                        | 9.0570                      | 9.0571                      | 9.0585                      | 9.0567                      | 121.3444                         | 121.0136                       | 121.0251                       | 121.0223                       | 121.0062                       | 0.0096                                      | -0.3383               | 0.0529                            | 0.1306          |
|      |           |         | Leu189       | 8.3170                        | 8.3142                      | 8.3090                      | 8.3090                      | 8.3095                      | 119.7394                         | 119.7128                       | 119.7057                       | 119.7087                       | 119.7116                       | -0.0076                                     | -0.0279               | 0.0087                            | 0.1306          |
|      |           |         | Asp190       | 7.7686                        | 7.7571                      | 7.7548                      | 7.7572                      | 7.7546                      | 119.6735                         | 119.8182                       | 119.8608                       | 119.8748                       | 119.8553                       | -0.0140                                     | 0.1818                | 0.0313                            | 0.1306          |
|      |           |         | Lys191       | 7.7985                        | 7.7879                      | 7.7831                      | 7.7839                      | 7.7842                      | 121.4505                         | 121.4252                       | 121.4112                       | 121.4220                       | 121.4123                       | -0.0143                                     | -0.0382               | 0.0155                            | 0.1306          |
|      |           |         | Val192       | 8.2327                        | 8.3090                      | 8.3064                      | 8.3085                      | 8.3069                      | 120.9042                         | 120.9277                       | 120.9361                       | 120.9373                       | 120.9322                       | 0.0743                                      | 0.0281                | 0.0744                            | 0.1306          |
|      |           |         | Lys193       | 8.3058                        | 8.3120                      | 8.3267                      | 8.3277                      | 8.3275                      | 118.1856                         | 118.1864                       | 118.2023                       | 118.2029                       | 118.2034                       | 0.0216                                      | 0.0179                | 0.0218                            | 0.1306          |
|      |           |         | Ala194       | 7.4468                        | 7.4359                      | 7.3955                      | 7.3948                      | 7.3961                      | 116.7496                         | 116.7364                       | 116.6936                       | 116.6830                       | 116.7043                       | -0.0507                                     | -0.0453               | 0.0512                            | 0.1306          |
|      |           |         | Lys195       | 7.3950                        | 7.3974                      | 7.3967                      | 7.3975                      | 7.3982                      | 116.4282                         | 116.4812                       | 116.5182                       | 116.5067                       | 116.4960                       | 0.0032                                      | 0.0678                | 0.0109                            | 0.1306          |
|      |           |         | Phe196       | 6.7229                        | 6.7287                      | 6.7300                      | 6.7300                      | 6.7300                      | 113.5020                         | 113.4134                       | 113.3819                       | 113.3819                       | 113.3819                       | 0.0071                                      | -0.1201               | 0.0198                            | 0.1306          |
|      |           |         | Pro197       |                               |                             |                             |                             |                             |                                  |                                |                                |                                |                                |                                             |                       |                                   | 0.1306          |
|      |           |         | Ser198       | 8.0278                        | 8.0359                      | 8.0371                      | 8.0363                      | 8.0347                      | 112.3189                         | 112.3137                       | 112.3233                       | 112.3139                       | 112.3092                       | 0.0069                                      | -0.0097               | 0.0071                            | 0.1306          |
|      |           |         | Ala199       | 7.2071                        | 7.2046                      | 7.2038                      | 7.2043                      | 7.2045                      | 123.3054                         | 123.2944                       | 123.2909                       | 123.2998                       | 123.2912                       | -0.0026                                     | -0.0143               | 0.0034                            | 0.1306          |
|      |           |         | Arg200       | 9.3624                        | 9.3464                      | 9.3341                      | 9.3167                      | 9.3244                      | 124.6472                         | 124.5996                       | 124.5919                       | 124.5989                       | 124.6013                       | -0.0380                                     | -0.0459               | 0.0387                            | 0.1306          |
|      |           |         | Tyr201       | 7.0474                        | 7.0454                      | 7.1225                      | 7.1220                      | 7.1232                      | 111.1412                         | 111.1307                       | 111.4497                       | 111.4457                       | 111.4802                       | 0.0758                                      | 0.3390                | 0.0920                            | 0.1306          |
|      |           |         | Val202       | 9.6367                        | 9.6576                      | 9.6561                      | 9.6545                      | 9.6539                      | 123.6114                         | 123.6875                       | 123.7007                       | 123.7092                       | 123.7110                       | 0.0172                                      | 0.0996                | 0.0230                            | 0.1306          |
|      |           |         | Val203       | 8.8874                        | 8.8833                      | 8.8882                      | 8.8875                      | 8.8883                      | 126.7850                         | 126.7286                       | 126.3474                       | 126.3566                       | 126.3294                       | 0.0009                                      | -0.4556               | 0.0701                            | 0.1306          |
|      |           |         | Pro204       |                               |                             |                             |                             |                             |                                  |                                |                                |                                |                                |                                             |                       |                                   | 0.1306          |
|      |           |         | Gly205       | 6.6797                        |                             |                             |                             |                             | 105.3189                         |                                |                                |                                |                                |                                             |                       |                                   | 0.1306          |
| L12  | Z2        | 263     | His206       | 7.7665                        | 7.7337                      | 7.7330                      | 7.7317                      | 7.7312                      | 118.0620                         | 117.9003                       | 117.8945                       | 117.8995                       | 117.9067                       | -0.0353                                     | -0.1552               | 0.0426                            | 0.1306          |
| L12  |           | 264     | Gly207       | 9.5466                        |                             |                             |                             |                             | 112.0497                         |                                |                                |                                |                                |                                             |                       |                                   | 0.1306          |
| L12  |           | 265     | Asp208       | 8.9730                        | 8.8954                      | 8.8951                      | 8.8927                      | 8.8920                      | 119.9430                         | 119.4490                       | 119.4554                       | 119.4535                       | 119.4490                       | -0.0810                                     | -0.4941               | 0.1111                            | 0.1306          |
|      |           |         | Tyr209       | 7.0744                        | 7.0654                      | 7.0601                      | 7.0622                      | 7.0611                      | 115.8107                         | 115.7488                       | 115.6703                       | 115.7022                       | 115.6635                       | -0.0133                                     | -0.1472               | 0.0262                            | 0.1306          |
|      |           |         | Gly210       | 8.2742                        | 8.2825                      | 8.2896                      | 8.2929                      | 8.2964                      | 109.2279                         | 109.2489                       | 109.3103                       | 109.3099                       | 109.3350                       | 0.0222                                      | 0.1071                | 0.0276                            | 0.1306          |
|      |           |         | Thr212       | 8.8354                        | 8.8102                      | 8.8084                      | 8.8082                      | 8.8087                      | 109.4553                         | 109.1819                       | 109.1577                       | 109.1528                       | 109.1582                       | -0.0267                                     | -0.2971               | 0.0529                            | 0.1306          |
|      |           |         | Glu213       | 10.1220                       | 10.1435                     | 10.1444                     | 10.1432                     | 10.1434                     | 126.9096                         | 126.9183                       | 126.9104                       | 126.8999                       | 126.9022                       | 0.0214                                      | -0.0075               | 0.0214                            | 0.1306          |
|      |           |         | Leu214       | 8.0079                        | 8.0263                      | 8.0278                      | 8.0318                      | 8.0304                      | 121.7269                         | 121.7831                       | 121.7958                       | 121.7869                       | 121.7684                       | 0.0225                                      | 0.0414                | 0.0234                            | 0.1306          |
|      |           |         | Ile215       | 8.1414                        | 8.1881                      | 8.1870                      | 8.1877                      | 8.1889                      | 121.3222                         | 121.8023                       | 121.8011                       | 121.8086                       | 121.8120                       | 0.0475                                      | 0.4898                | 0.0891                            | 0.1306          |
|      |           |         | Glu216       | 7.1693                        | 7.1449                      | 7.1449                      | 7.1454                      | 7.1461                      | 118.8475                         | 118.8354                       | 118.8509                       | 118.8404                       | 118.8410                       | -0.0233                                     | -0.0065               | 0.0233                            | 0.1306          |
|      |           |         | His217       |                               |                             |                             |                             |                             |                                  |                                |                                |                                |                                |                                             |                       |                                   | 0.1306          |
|      |           |         | Thr218       | 7.9809                        | 7.9933                      | 7.9927                      | 7.9886                      | 7.9874                      | 113.9474                         | 113.9347                       | 113.9324                       | 113.9101                       | 113.8901                       | 0.0065                                      | -0.0573               | 0.0109                            | 0.1306          |

| Loop | Zinc<br>lig. | BBL<br>no. | CcrA<br>residue | $\delta$ (ppm)                |                             |                             |                             |                             |                                  |                                |                                |                                |                                | $\Delta\delta_{\text{final-initial}}$ (ppm) |                       | CSP (ppm)                         |                 |
|------|--------------|------------|-----------------|-------------------------------|-----------------------------|-----------------------------|-----------------------------|-----------------------------|----------------------------------|--------------------------------|--------------------------------|--------------------------------|--------------------------------|---------------------------------------------|-----------------------|-----------------------------------|-----------------|
|      |              |            |                 | $^1\text{H}_{\text{initial}}$ | $^1\text{H}_{\text{Step1}}$ | $^1\text{H}_{\text{Step2}}$ | $^1\text{H}_{\text{Step3}}$ | $^1\text{H}_{\text{final}}$ | $^{15}\text{N}_{\text{initial}}$ | $^{15}\text{N}_{\text{Step1}}$ | $^{15}\text{N}_{\text{Step2}}$ | $^{15}\text{N}_{\text{Step3}}$ | $^{15}\text{N}_{\text{final}}$ | $\Delta^1\text{H}$                          | $\Delta^{15}\text{N}$ | $\Delta^1\text{H}, ^{15}\text{N}$ | $\mu + 1\sigma$ |
|      |              |            | Lys219          | 8.1045                        | 8.1031                      | 8.0861                      | 8.0908                      | 8.0771                      | 121.9507                         | 121.8895                       | 121.8546                       | 121.8685                       | 121.8219                       | -0.0275                                     | -0.1288               | 0.0339                            | 0.1306          |
|      |              |            | Gln220          | 7.7886                        | 7.7889                      | 7.8053                      | 7.8075                      | 7.8081                      | 117.2130                         | 117.2156                       | 117.4315                       | 117.4352                       | 117.4359                       | 0.0195                                      | 0.2229                | 0.0394                            | 0.1306          |
|      |              |            | Ile221          | 7.3437                        | 7.3608                      | 7.3600                      | 7.3643                      | 7.3645                      | 119.3728                         | 119.8750                       | 119.8885                       | 119.9175                       | 119.9145                       | 0.0208                                      | 0.5417                | 0.0859                            | 0.1306          |
|      |              |            | Val222          | 8.1190                        | 8.0434                      | 8.0413                      | 8.0420                      | 8.0418                      | 121.3753                         | 120.9296                       | 120.9432                       | 120.9401                       | 120.9265                       | -0.0772                                     | -0.4488               | 0.1036                            | 0.1306          |
|      |              |            | Asn223          | 8.7295                        | 8.7554                      | 8.7535                      | 8.7564                      | 8.7573                      | 118.3961                         | 118.2697                       | 118.2790                       | 118.2624                       | 118.2779                       | 0.0278                                      | -0.1182               | 0.0332                            | 0.1306          |
|      |              |            | Gln224          | 8.2152                        | 8.2201                      | 8.2182                      | 8.2364                      | 8.2273                      | 119.8558                         | 119.8593                       | 119.8958                       | 119.9297                       | 119.9010                       | 0.0121                                      | 0.0452                | 0.0139                            | 0.1306          |
|      |              |            | Tyr225          | 7.8503                        | 7.8839                      | 7.8854                      | 7.8846                      | 7.8854                      | 122.0587                         | 122.1642                       | 122.1769                       | 122.1722                       | 122.1811                       | 0.0351                                      | 0.1224                | 0.0398                            | 0.1306          |
|      |              |            | Ile226          | 8.5147                        | 8.5419                      | 8.5425                      | 8.5431                      | 8.5433                      | 122.4502                         | 122.4523                       | 122.4533                       | 122.4463                       | 122.4643                       | 0.0286                                      | 0.0141                | 0.0287                            | 0.1306          |
|      |              |            | Glu227          | 8.3322                        | 8.3847                      | 8.3808                      | 8.3832                      | 8.3821                      | 119.7497                         | 119.7284                       | 119.7301                       | 119.7346                       | 119.7346                       | 0.0499                                      | -0.0151               | 0.0500                            | 0.1306          |
|      |              |            | Ser228          | 7.9386                        | 7.9483                      | 7.9493                      | 7.9500                      | 7.9505                      | 114.0218                         | 113.9896                       | 113.9898                       | 113.9922                       | 113.9921                       | 0.0119                                      | -0.0297               | 0.0127                            | 0.1306          |
|      |              |            | Thr229          | 7.5036                        | 7.5006                      | 7.4994                      | 7.4987                      | 7.4991                      | 112.0905                         | 112.0667                       | 112.0572                       | 112.0591                       | 112.0533                       | -0.0045                                     | -0.0372               | 0.0073                            | 0.1306          |
|      |              |            | Ser230          | 7.6892                        | 7.6875                      | 7.6859                      | 7.6863                      | 7.6862                      | 117.4253                         | 117.4356                       | 117.4419                       | 117.4411                       | 117.4381                       | -0.0030                                     | 0.0128                | 0.0036                            | 0.1306          |
|      |              |            | Lys231          | 8.0129                        | 8.0278                      | 8.0371                      | 8.0577                      | 8.0601                      | 124.2667                         | 124.2796                       | 124.2816                       | 124.2832                       | 124.2531                       | 0.0472                                      | -0.0136               | 0.0472                            | 0.1306          |
|      |              |            | Pro232          |                               |                             |                             |                             |                             |                                  |                                |                                |                                |                                |                                             |                       |                                   |                 |

## 2.2.2 Direction of chemical shift perturbation (DCSP) analysis

**Table S7.** DCSP analysis data for compounds 4–6. The DCSP is different if the signs of ( $\Delta^1\text{H}, \Delta^{15}\text{N}$ ) are not all = (+,+), (+,-), (-,+) or (-,-); and the DSCP is the same if the signs of ( $\Delta^1\text{H}, \Delta^{15}\text{N}$ ) are all = (+,+), (+,-), (-,+) or (-,-). The residues are ordered based on their position in the active site (i.e. on cross sections of the active site). For cells colored in grey, the first titration points were used in the calculations of the  $^1\text{H}$  and  $^{15}\text{N}$   $\Delta\delta$  since the initial data points were missing. In 1A8T, residues 88, 171 and 208 correspond to Ile, Ala and Asn (Table S1).

|                                             |                                   | Compound:    |            | 4               |                                             | 5                     |                    | 6                     |                    | 4                     | 5                                                         | 6    | 4, 5 & 6 | 4 & 5                                 | 5 & 6    | 4 & 6    | Max.<br>no. of <i>I</i> |          |
|---------------------------------------------|-----------------------------------|--------------|------------|-----------------|---------------------------------------------|-----------------------|--------------------|-----------------------|--------------------|-----------------------|-----------------------------------------------------------|------|----------|---------------------------------------|----------|----------|-------------------------|----------|
|                                             | Loop                              | Zinc<br>lig. | BBL<br>no. | CcrA<br>residue | $\Delta\delta_{\text{final-initial}}$ (ppm) |                       |                    |                       |                    |                       | Significant CSP                                           |      |          | Direction of CSP                      |          |          |                         |          |
|                                             |                                   |              |            |                 | $\Delta^1\text{H}$                          | $\Delta^{15}\text{N}$ | $\Delta^1\text{H}$ | $\Delta^{15}\text{N}$ | $\Delta^1\text{H}$ | $\Delta^{15}\text{N}$ | $\Delta\delta(^1\text{H}, ^{15}\text{N}) > \mu + 1\sigma$ |      |          | <i>I</i> = different; <i>O</i> = same |          |          |                         |          |
| L3-L5-L7<br>binding site                    | L3                                |              | 60         | Glu28           | 0.0511                                      | 0.3058                | 0.0007             | 0.0250                | -0.0007            | -0.1627               |                                                           |      |          | <i>I</i>                              | <i>O</i> | <i>I</i> | <i>I</i>                | <i>I</i> |
|                                             | L5                                |              | 87         | Ile55           | 0.0000                                      | 0.0000                | -0.0725            | -0.0739               | 0.0845             | -0.3994               |                                                           | SCSP |          | <i>I</i>                              | <i>I</i> | <i>I</i> | <i>I</i>                | <i>I</i> |
|                                             | >L7                               |              | 122        | Leu88           | -0.0099                                     | -0.1877               | 0.0112             | -0.2155               | -0.0445            | 0.5369                |                                                           |      |          | <i>I</i>                              | <i>I</i> | <i>I</i> | <i>I</i>                | <i>I</i> |
|                                             | >L7                               |              | 123        | Gly89           | 0.1881                                      | 0.2707                | 0.1288             | -0.1919               | 0.1714             | 0.4621                | SCSP                                                      | SCSP | SCSP     | <i>I</i>                              | <i>I</i> | <i>I</i> | <i>O</i>                | <i>I</i> |
|                                             | L3                                |              | 61         | Ile29           | -0.0927                                     | -0.6534               | -0.0513            | -0.8537               | -0.0294            | -0.6104               | SCSP                                                      | SCSP |          | <i>O</i>                              | <i>O</i> | <i>O</i> | <i>O</i>                | <i>I</i> |
|                                             | L3                                |              | 62         | Glu30           | -0.1036                                     | -0.0059               | -0.1377            | 0.0205                | 0.0803             | 0.2923                | SCSP                                                      | SCSP |          | <i>I</i>                              | <i>I</i> | <i>I</i> | <i>I</i>                | <i>I</i> |
|                                             | L7                                |              | 117        | Trp83           | -0.1628                                     | 0.3354                | -0.0484            | -0.3176               | -0.0976            | 0.3382                | SCSP                                                      |      |          | <i>I</i>                              | <i>I</i> | <i>I</i> | <i>O</i>                | <i>I</i> |
|                                             | >L7                               |              | 119        | Gly85           | -0.0427                                     | 0.0055                | -0.0000            | 0.0001                | -0.0017            | 0.0310                |                                                           |      |          | <i>O</i>                              | <i>O</i> | <i>O</i> | <i>O</i>                | <i>I</i> |
| Catalytic site                              | L7                                | Z1           | 116        | His82           | -0.0286                                     | 0.0951                | -0.0314            | -0.1798               | -0.1097            | -1.2074               |                                                           |      | SCSP     | <i>I</i>                              | <i>I</i> | <i>O</i> | <i>I</i>                | <i>I</i> |
|                                             | L7                                | Z1           | 118        | His84           | -0.0361                                     | -1.4033               | -0.0180            | -0.9725               | -0.1187            | -1.3782               | SCSP                                                      | SCSP | SCSP     | <i>O</i>                              | <i>O</i> | <i>O</i> | <i>O</i>                | <i>I</i> |
|                                             | >L7                               | Z2           | 120        | Asp86           |                                             |                       |                    |                       |                    |                       |                                                           |      |          |                                       |          |          |                         |          |
|                                             | L9                                | Z1           | 196        | His145          | 0.0752                                      | -0.1817               | 0.1068             | -0.0877               | -0.0764            | -0.7167               |                                                           | SCSP |          | <i>I</i>                              | <i>O</i> | <i>I</i> | <i>I</i>                | <i>I</i> |
|                                             | L10                               | Z2           | 221        | Cys164          |                                             |                       |                    |                       |                    |                       |                                                           |      |          |                                       |          |          |                         |          |
|                                             | L12                               | Z2           | 263        | His206          | 0.0457                                      | -0.6275               | 0.0084             | 0.0060                | -0.0353            | -0.1552               | SCSP                                                      |      |          | <i>I</i>                              | <i>I</i> | <i>I</i> | <i>I</i>                | <i>I</i> |
| L3-L10<br>b. site                           | L10                               |              | 232        | Gly175          | 0.0972                                      | 0.4952                | 0.0795             | 0.1978                | 0.1815             | 0.9060                | SCSP                                                      | SCSP | SCSP     | <i>O</i>                              | <i>O</i> | <i>O</i> | <i>O</i>                | <i>I</i> |
|                                             | L10                               |              | 233        | Asn176          | 0.0032                                      | 0.0242                | -0.0072            | 0.0115                | 0.0005             | 0.0078                |                                                           |      |          | <i>I</i>                              | <i>I</i> | <i>I</i> | <i>O</i>                | <i>I</i> |
|                                             | L10                               |              | 235        | Ser178          | -0.1091                                     | -0.1820               |                    |                       | -0.0747            | -0.3598               | SCSP                                                      |      |          |                                       |          |          | <i>O</i>                | <i>I</i> |
|                                             | L3                                |              | 63         | Gly31           | -0.0065                                     | 0.5989                | -0.0119            | 0.5082                | -0.0005            | 0.5800                |                                                           | SCSP |          | <i>O</i>                              | <i>O</i> | <i>O</i> | <i>O</i>                | <i>I</i> |
|                                             | L3                                |              | 64         | Trp32           | 0.1093                                      | -0.3223               | 0.1131             | -0.1928               | 0.1664             | -0.2978               | SCSP                                                      | SCSP | SCSP     | <i>O</i>                              | <i>O</i> | <i>O</i> | <i>O</i>                | <i>I</i> |
|                                             | L3                                |              | 65         | Gly33           | -0.1073                                     | 0.7126                | -0.0906            | 0.6140                | -0.0430            | 0.7218                | SCSP                                                      | SCSP |          | <i>O</i>                              | <i>O</i> | <i>O</i> | <i>O</i>                | <i>I</i> |
| L10-L12<br>binding site                     | L3                                |              | 66         | Met34           | -0.0752                                     | -0.0719               | -0.0257            | 0.2499                | -0.0187            | 0.0784                |                                                           |      |          | <i>I</i>                              | <i>I</i> | <i>O</i> | <i>I</i>                | <i>I</i> |
|                                             | L3                                |              | 67         | Val35           | 0.0705                                      | 1.1388                | -0.0445            | 1.3190                | 0.1118             | 1.6981                | SCSP                                                      | SCSP | SCSP     | <i>I</i>                              | <i>I</i> | <i>I</i> | <i>O</i>                | <i>I</i> |
|                                             | L10                               |              | 224        | Lys167          | 0.0641                                      | -0.0654               | 0.0767             | -0.2636               | 0.0377             | -0.5809               |                                                           | SCSP |          | <i>O</i>                              | <i>O</i> | <i>O</i> | <i>O</i>                | <i>I</i> |
|                                             | L10                               |              | 228        | Ala171          | -0.0235                                     | 0.2478                | -0.0013            | 0.2053                | -0.0623            | 0.0234                |                                                           |      |          | <i>O</i>                              | <i>O</i> | <i>O</i> | <i>O</i>                | <i>I</i> |
|                                             | L10                               |              | 230        | Ser173          | 0.0650                                      | 0.2964                | 0.0742             | 0.2346                | 0.1651             | 0.4772                |                                                           | SCSP | SCSP     | <i>O</i>                              | <i>O</i> | <i>O</i> | <i>O</i>                | <i>I</i> |
|                                             | L10                               |              | 225        | Asp168          | 0.0178                                      | -0.2636               | 0.0101             | -0.1237               | -0.0064            | -0.6022               |                                                           |      |          | <i>I</i>                              | <i>O</i> | <i>I</i> | <i>I</i>                | <i>I</i> |
|                                             | L12                               |              | 264        | Gly207          | 0.0000                                      | 0.0000                |                    |                       |                    |                       |                                                           |      |          |                                       |          |          |                         | <i>I</i> |
|                                             | L10                               |              | 227        | Gln170          | 0.1293                                      | -0.0802               | 0.0843             | 0.0116                | 0.0996             | -0.2197               | SCSP                                                      | SCSP |          | <i>I</i>                              | <i>I</i> | <i>I</i> | <i>O</i>                | <i>I</i> |
|                                             | L12                               |              | 265        | Asp208          | -0.2104                                     | -0.4666               | -0.0612            | -0.6240               | -0.0810            | -0.4941               | SCSP                                                      | SCSP |          | <i>O</i>                              | <i>O</i> | <i>O</i> | <i>O</i>                | <i>I</i> |
|                                             | $\Sigma$ / active site residues = |              |            |                 |                                             |                       |                    |                       |                    |                       |                                                           |      | 14       | 11                                    | 12       | 9        | 27                      |          |
| $\Sigma$ / L3-L5-L7 binding site residues = |                                   |              |            |                 |                                             |                       |                    |                       |                    |                       |                                                           | 5    | 5        | 5                                     | 3        | 7        |                         |          |
| $\Sigma$ / L3-L10 binding site residues =   |                                   |              |            |                 |                                             |                       |                    |                       |                    |                       |                                                           | 0    | 0        | 0                                     | 0        | 3        |                         |          |
| $\Sigma$ / L10-L12 binding site residues =  |                                   |              |            |                 |                                             |                       |                    |                       |                    |                       |                                                           | 2    | 1        | 2                                     | 1        | 7        |                         |          |

### 2.2.2.1 Per residue plots of CSP data

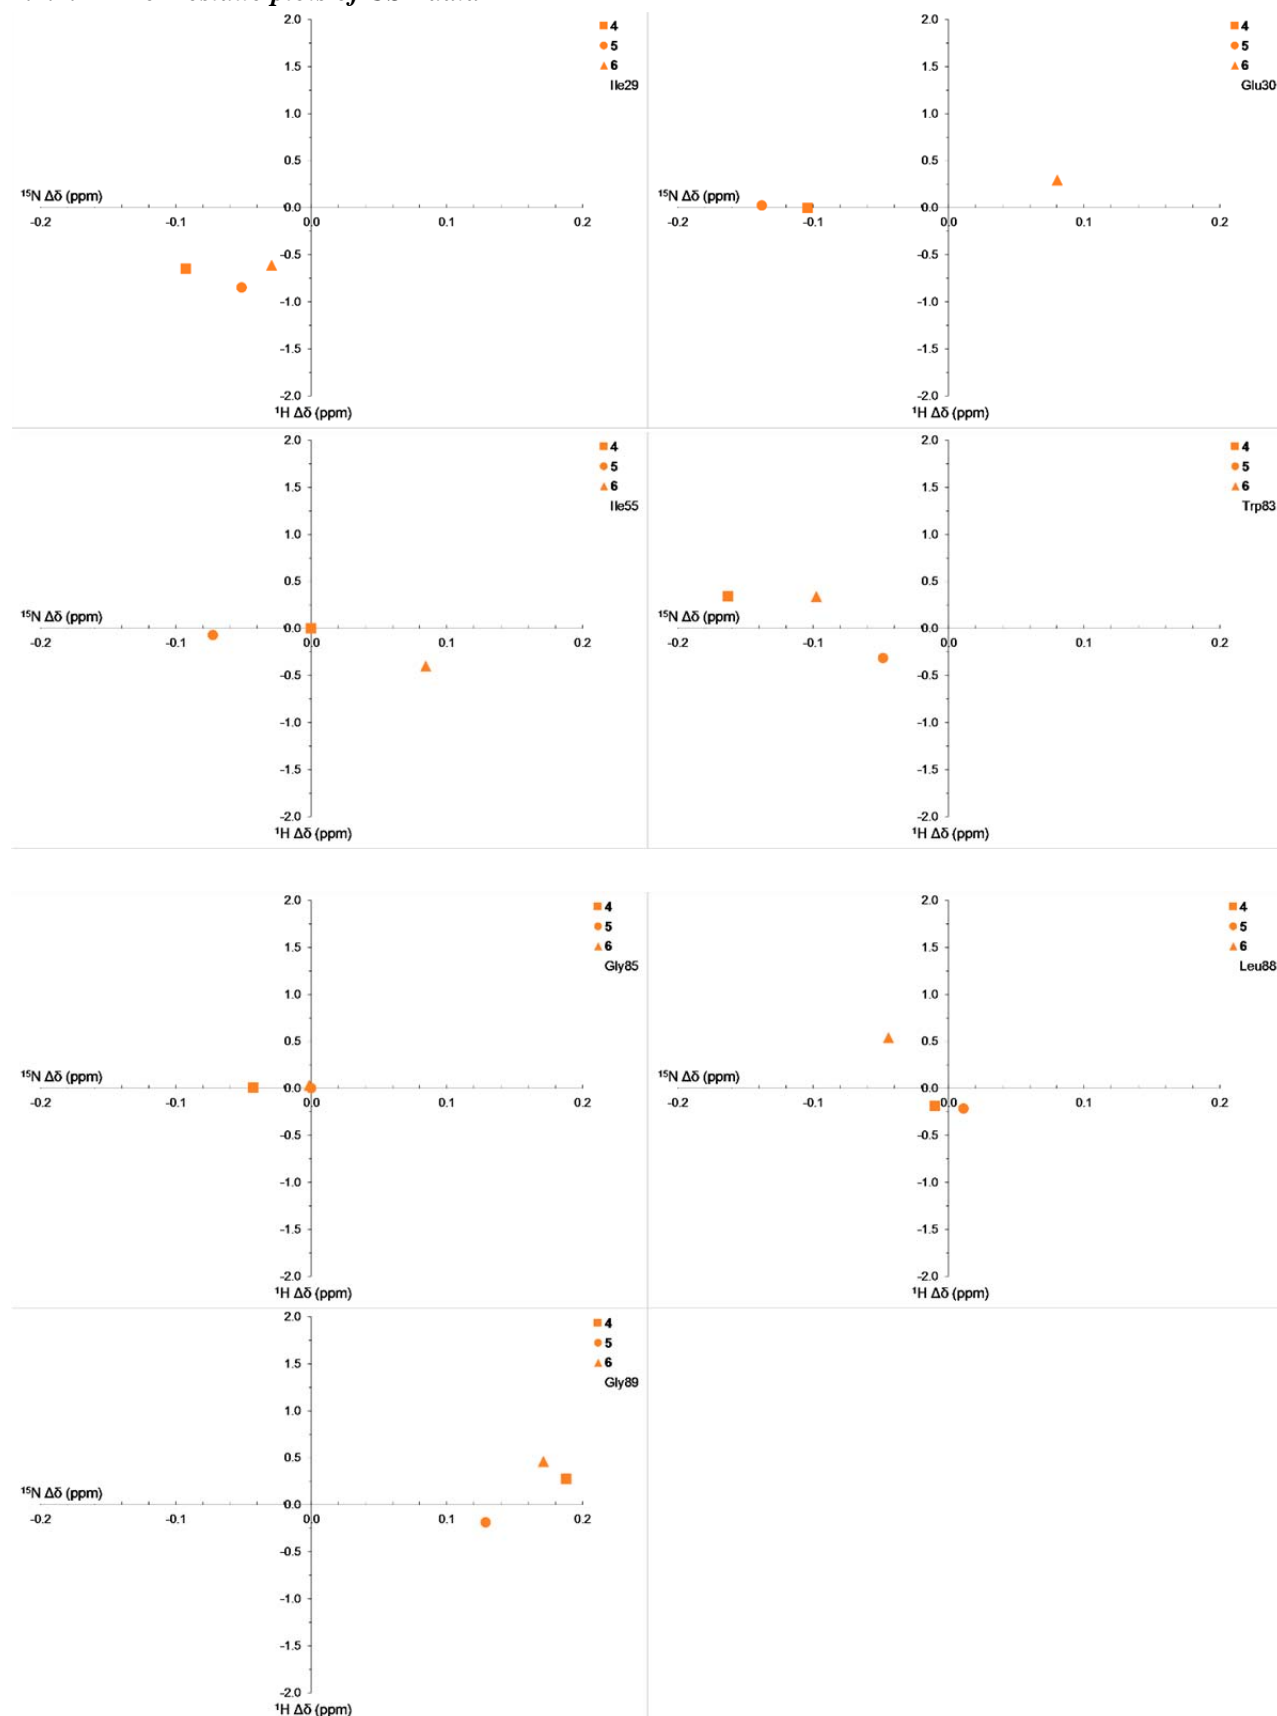

**Figure S12.** Per residue plots of the  $^{15}\text{N}$  and  $^1\text{H}$   $\Delta\delta$  for residues 29, 30, 55, 83, 85, 88 and 89 in the L3-L5-L7 binding site.

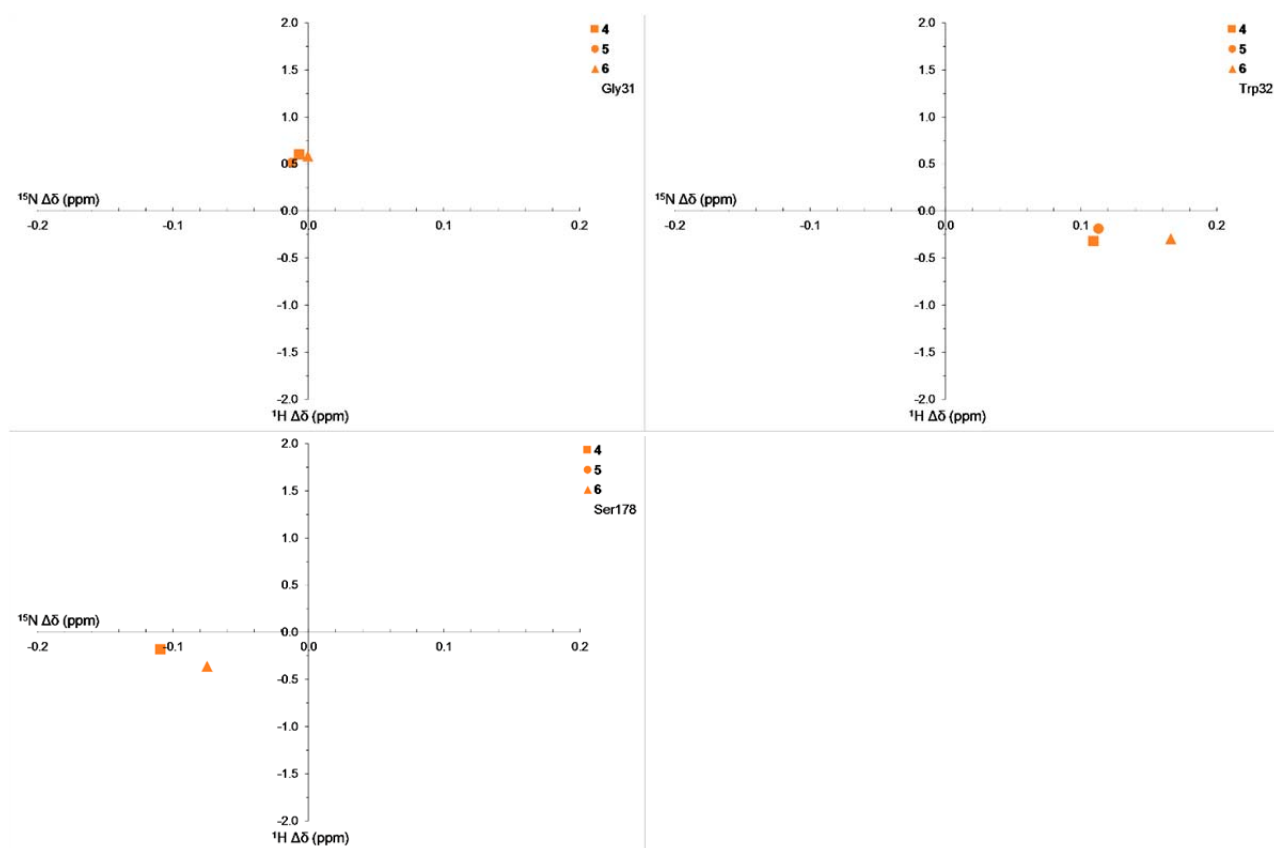

**Figure S13.** Per residue plots of the  $^{15}\text{N}$  and  $^1\text{H}$   $\Delta\delta$  for residues 31, 32 and 178 in the L3-L10 binding site.

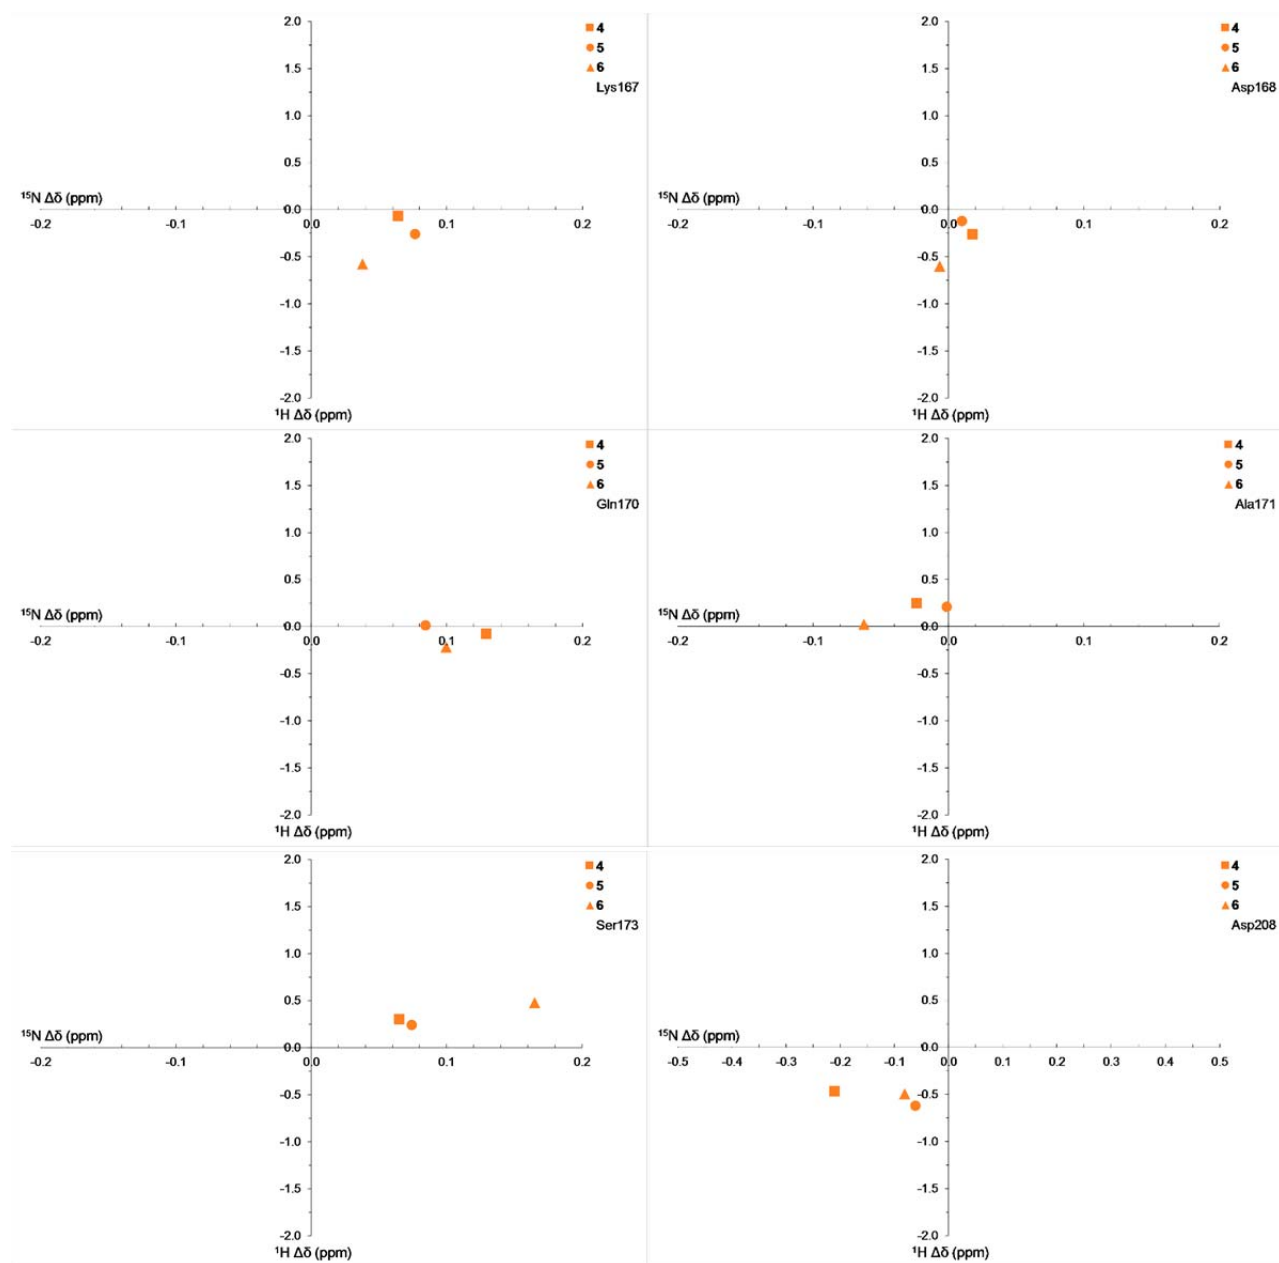

**Figure S14.** Per residue plots of the  $^{15}\text{N}$  and  $^1\text{H}$   $\Delta\delta$  for residues 167, 168, 170, 171, 173 and 208 in the L10-L12 binding site.

## 3 Molecular docking

### 3.1 General information

Schrödinger software (Schrödinger, LLC, New York, NY, 2019) was used for all the steps in the molecular docking. Unless otherwise stated, default settings were used in the computations. The crystal structure of CcrA (PDB ID 1A8T, chain A) was prepared using the Protein Preparation Wizard; involving Prime to fill in missing side chains and loops, Epik to generate heteroatom states ( $\text{pH } 7.0 \pm 2.0$ ), PropKa ( $\text{pH } 7$ ) to optimize the hydrogen bond network (sampling of water orientations when appropriate), and the OPLS3e force field in the restrained minimization (hydrogens only). The Receptor Grid Generation module in Glide was used to define the active site by creating a rectangular box centered on the native ligand (i.e. biphenyltetrazole type inhibitor L-159.061) and extending in all directions to encompass ligands of similar size (i.e.  $16.5 \text{ \AA}$ ) or ligands  $< 22 \text{ \AA}$  (see 3.2.1 for details). Grids with 8, 1 and 0 water molecules in the active site were generated and validated, resulting in the selection of grid G1-b (i.e. a grid with 1 water molecule kept in the active site, and extending in all directions to encompass ligands  $< 22 \text{ \AA}$ ) for all the docking studies. The ligands were converted to 3D all atom structures using LigPrep. Epik was used to generate possible ionization states at target  $\text{pH } 7 \pm 2$ , including metal binding states. Tautomers were selected to be generated. The molecular docking was performed using Glide. Default settings were used for the ligand parameters. All compounds were docked using the flexible docking mode, with sampling of nitrogen inversions and ring conformations (only for L-159.061), and with extra precision (XP) rescoring. Biased sampling of torsions was selected for amides by penalizing non-planar conformations. Epik state penalties was selected to be added to the docking score. A maximum of 100 poses were selected to be generated for each ligand. Post-docking minimization was used, and per-residue interaction scores were written for residues within  $10 \text{ \AA}$  from the grid center. Prime MM-GBSA rescoring of docking poses (VSGB 2.0 solvation model and OPLS3e force field) were performed providing poses ranked based on free energy of binding ( $\Delta G_{\text{bind}}$  in  $\text{kcal mol}^{-1}$ ).<sup>10</sup> For these calculations, flexibility was allowed for residues within  $10 \text{ \AA}$  from the ligands, and minimization was selected as sampling method. Structural interaction fingerprints (SIFts) in Canvas was used for representation and analysis of the docking poses.<sup>11</sup> Side chain, zinc ion, and hydrogen bonding interactions were used to generate the SIFts. The similarity between the SIFts were evaluated using the Tanimoto similarity metric, and clustering was performed using the Flexible Beta linkage method. Epik (Schrödinger, LLC, New York, NY, 2020) was used for empirical predictions of aqueous  $\text{pK}_a$  values (Section 3.4).

### 3.2 Verification of the docking method

Among the variety of CcrA inhibitors reported previously,<sup>2, 12-29</sup> there are crystal structures reported for four CcrA-ligand complexes.<sup>12-13, 20</sup> The complex with the ligand most similar in size and structure to the 2TTA type CcrA inhibitors was selected to be used in the study, i.e. PDB ID 1A8T ( $2.5 \text{ \AA}$  resolution) with ligand L-159.061 (Figure S15).<sup>13</sup>

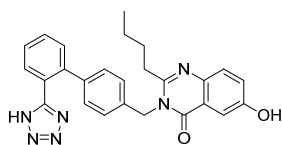

**Figure S15.** The structure of the native biphenyltetrazole ligand L-159.061.

#### 3.2.1 Redocking of the native ligand

After the protein preparation and grid generation steps the native biphenyltetrazole ligand L-159.061 (Figure S15) was re-docked into the active site of CcrA (PDB ID 1A8T) for validation of the docking method. Three grids denominated G8, G1 and G0 were generated with 8, 1 and 0 water molecules, respectively, kept in the active site, and with the active site defined as a rectangular box centered on the native ligand L-159.061 and extending in all directions to encompass ligands of similar size. In the X-ray structure there are two water molecules involved in hydrogen bonding with the ligand. Water molecule number 315 is interacting with the

carbonyl oxygen, and water molecule number 289 is interacting with the ethereal oxygen, of the 4*H*-3,1-benzoxazin-4-one moiety. In grid G8, the water molecules with a distance shorter than 5 Å to a heteroatom were kept, including number 315 and 289, whereas in grid G1 only 315 was kept. Water 315 is hydrogen bonding with the neutral Lys167 residue (p*K*<sub>a</sub> 6.64 predicted by Epik), and was considered to be the most important water to keep for the docking of the native ligand. It was also considered to be relevant for the docking of the 2TTA compounds. Since the 2TTA compounds are slightly larger than the native ligand, a second G1 grid, labeled G1-b, extending in all directions to encompass ligands < 22 Å was generated. In addition, Ser37, Ser173 and Thr171 were defined as rotatable groups. The results from scoring-in-place Glide calculations of L-159.061 employing the different grids are presented in Table S8, and the poses from the XP dockings are shown in Figure S16.

**Table S8.** Validation of docking method by re-docking of the native biphenyltetrazole ligand L-159.061 into the active site of CcrA (PDB ID 1A8T).

| Settings               |                 |                           |                   | Results               |                                       |
|------------------------|-----------------|---------------------------|-------------------|-----------------------|---------------------------------------|
| Precision <sup>a</sup> | Ligand sampling | Post-docking minimization | Grid <sup>b</sup> | RMSD <sup>c</sup> (Å) | Glide score (kcal mol <sup>-1</sup> ) |
| SP                     | Score in place  | No                        | G8                | 0                     | -4.506                                |
| SP                     | Score in place  | No                        | G1                | 0                     | -3.593                                |
| SP                     | Score in place  | No                        | G1-b              | 0                     | -3.727                                |
| SP                     | Score in place  | No                        | G0                | 0                     | -3.157                                |
| XP                     | Score in place  | No                        | G8                | 0                     | -4.294                                |
| XP                     | Score in place  | No                        | G1                | 0                     | -2.465                                |
| XP                     | Score in place  | No                        | G1-b              | 0                     | -2.522                                |
| XP                     | Score in place  | No                        | G0                | 0                     | -1.883                                |
| SP                     | Rigid           | No                        | G8                | 0.444                 | -5.806                                |
|                        |                 | Yes                       |                   | 0.858                 | -6.576                                |
| SP                     | Rigid           | No                        | G1                | 0.383                 | -4.857                                |
|                        |                 | Yes                       |                   | 1.505                 | -4.990                                |
| SP                     | Rigid           | No                        | G1-b              | 0.495                 | -4.795                                |
|                        |                 | Yes                       |                   | 1.256                 | -5.141                                |
| SP                     | Rigid           | No                        | G0                | 0.658                 | -4.535                                |
|                        |                 | Yes                       |                   | 1.503                 | -5.036                                |
| XP                     | Rigid           | No                        | G8                | 0.582                 | -4.720                                |
|                        |                 | Yes                       |                   | 1.039                 | -5.127                                |
| XP                     | Rigid           | No                        | G1                | 0.344                 | -3.844                                |
|                        |                 | Yes                       |                   | 1.279                 | -3.878                                |
| XP                     | Rigid           | No                        | G1-b              | 0.585                 | -3.690                                |
|                        |                 | Yes                       |                   | 1.250                 | -4.017                                |
| XP                     | Rigid           | No                        | G0                | 0.431                 | -3.515                                |
|                        |                 | Yes                       |                   | 1.187                 | -3.772                                |
| SP                     | Flexible        | No                        | G8                | 1.465                 | -4.173                                |
|                        |                 | Yes                       |                   | 1.148                 | -4.864                                |
| SP                     | Flexible        | No                        | G1                | 1.442                 | -4.589                                |
|                        |                 | Yes                       |                   | 1.281                 | -4.592                                |
| SP                     | Flexible        | No                        | G1-b              | 1.091                 | -4.655                                |
|                        |                 | Yes                       |                   | 1.251                 | -3.952                                |
| SP                     | Flexible        | No                        | G0                | 1.402                 | -4.355                                |
|                        |                 | Yes                       |                   | 1.427                 | -4.291                                |
| XP                     | Flexible        | No                        | G8                | 0.950                 | -4.896                                |
|                        |                 | Yes                       |                   | 1.039                 | -5.301                                |
| XP                     | Flexible        | No                        | G1                | 1.278                 | -4.036                                |
|                        |                 | Yes                       |                   | 1.592                 | -4.299                                |
| XP                     | Flexible        | No                        | G1-b              | 1.091                 | -3.537                                |
|                        |                 | Yes                       |                   | 1.270                 | -3.454                                |
| XP                     | Flexible        | No                        | G0                | 1.701                 | -5.088                                |
|                        |                 | Yes                       |                   | 1.780                 | -4.608                                |

<sup>a</sup>SP = standard precision, XP = extra precision; <sup>b</sup>The name is related to the number of water molecules kept in the active site; <sup>c</sup>RMSD to the input ligand geometry using the maximum common substructure.

In the X-ray structure, the phenyl hydrogen atom (H17) that is pointing towards the tetrazole ring lies slightly out of the plane of the aromatic ring (Figure S16). Thus, if post-docking minimization is performed, the ring will never adopt the native conformation in the docking. Accordingly, larger RMSD's to the input ligand geometry were expected and observed when post-docking minimization was used in the rigid dockings. Smaller differences were observed between the RMSD's for the non-minimized and minimized ligands in the flexible dockings.

As can be seen in Table S8, both standard precision (SP) and extra precision (XP) docking with rigid and flexible ligand sampling were producing poses with a RMSD below the accepted 2 Å limit, and docking scores comparable to those obtained by the scoring-in-place calculations. Glide grid G1-b, and extra precision (XP) docking with flexible ligand sampling was selected to be used for the ligands in this study.

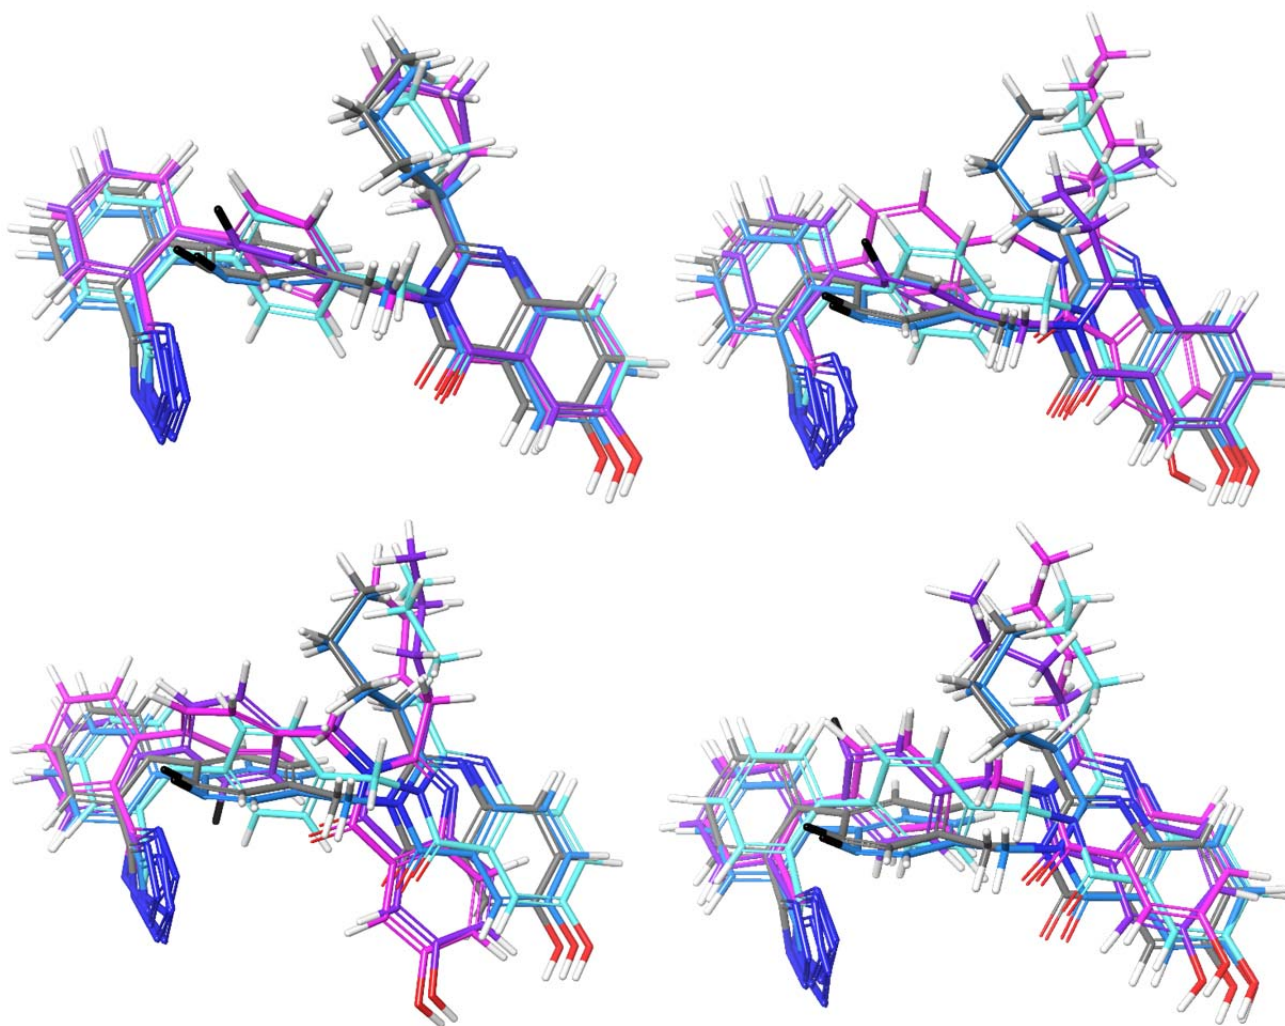

**Figure S16.** The original pose (grey) and re-docked poses (XP rigid with no post-docking minimization in blue; XP rigid with post-docking minimization in cyan; XP flexible with no post-docking minimization in violet; XP flexible with post-docking minimization in magenta), respectively, of the native ligand using the G8 (top left), G1 (top right), G0 (bottom left) and G1-b (bottom right) glide grids. Hydrogen H17 (PDB atom name) colored in black is out of plane of the phenyl ring in the X-ray structure (grey), and in the docked poses generated without post-docking minimization (blue and violet).

### 3.3 Molecular docking, MM-GBSA rescoring and SIFt based clustering of 4–6

Compounds **4–6** were investigated by molecular docking as described in the general information. The ionization state and tautomer variants generated by LigPrep are shown in Table S9. In line with previous data, both of the two *1H*-1,2,4-tautomers, as well as its deprotonated forms, were predicted by LigPrep, but not the less stable *4H*-1,2,4-tautomer or its deprotonated form.<sup>30</sup> The poses with a docking score smaller than -3 are presented in Table S10.

**Table S9.** Ionization state and tautomer variants of **4–6** generated by LigPrep and submitted to docking into CcrA.

| Cmpd (X) | Variant |     |     |     |
|----------|---------|-----|-----|-----|
|          | X.1     | X.2 | X.3 | X.4 |
| <b>4</b> |         |     |     |     |
| <b>5</b> |         |     |     |     |
| <b>6</b> |         |     |     |     |

**Table S10.** A summary of the results from the molecular docking, MM-GBSA rescoring and SIFt based clustering of **4–6** divided into three sub tables labeled accordingly. The top ranked pose (MM-GBSA) among each of the three main clusters of poses are marked with bold squares.

| <b>4</b>      |                      |                                  |      |                       |               |              |              |                                                 |      |                       |               |              |              |
|---------------|----------------------|----------------------------------|------|-----------------------|---------------|--------------|--------------|-------------------------------------------------|------|-----------------------|---------------|--------------|--------------|
| Cmpd. variant | Tautomer probability | XP docking                       |      | SIFt based clustering |               |              |              | MM-GBSA                                         |      | SIFt based clustering |               |              |              |
|               |                      | XP gscore kcal mol <sup>-1</sup> | Rank | Entry ID dendrogram   | Cluster index | Cluster size | Binding pose | $\Delta G_{\text{bind}}$ kcal mol <sup>-1</sup> | Rank | Entry ID dendrogram   | Cluster index | Cluster size | Binding pose |
| 4.2           | 0.427                | -9.563                           | 1    | 9012                  | 1             | 16           | L3-L5-L7     | -107.26                                         | 1    | 9605                  | 6             | 5            | L3-L5-L7     |
| 4.2           | 0.427                | -9.077                           | 2    | 9022                  | 2             | 13           | L3-L5-L7     | -105.97                                         | 2    | 9608                  | 9             | 6            | L3-L5-L7     |
| 4.3           | 0.573                | -9.037                           | 3    | 9030                  | 2             | 13           | L3-L5-L7     | -69.08                                          | 15   | 9647                  | 5             | 4            | L3-L5-L7     |
| 4.2           | 0.427                | -9.028                           | 4    | 9023                  | 3             | 7            | L3-L10       | -93.19                                          | 7    | 9623                  | 4             | 5            | L3-L10       |
| 4.1           | 0.573                | -8.947                           | 5    | 9020                  | 1             | 16           | L3-L5-L7     | -95.46                                          | 6    | 9620                  | 6             | 5            | L3-L5-L7     |
| 4.2           | 0.427                | -8.942                           | 6    | 9026                  | 2             | 13           | L3-L5-L7     | -99.33                                          | 5    | 9617                  | 9             | 6            | L3-L5-L7     |
| 4.3           | 0.573                | -8.847                           | 7    | 9034                  | 2             | 13           | L3-L5-L7     | -56.22                                          | 20   |                       |               |              |              |
| 4.3           | 0.573                | -8.817                           | 8    | 9036                  | 2             | 13           | L3-L5-L7     | -57.13                                          | 19   |                       |               |              |              |
| 4.3           | 0.573                | -8.530                           | 9    | 9041                  | 2             | 13           | L3-L5-L7     | -64.56                                          | 17   |                       |               |              |              |
| 4.1           | 0.573                | -8.487                           | 10   | 9029                  | 1             | 16           | L3-L5-L7     | -68.02                                          | 16   |                       |               |              |              |
| 4.3           | 0.573                | -8.268                           | 11   | 9043                  | 1             | 16           | L3-L5-L7     | -70.46                                          | 14   | 9644                  | 5             | 4            | L3-L5-L7     |
| 4.1           | 0.573                | -8.034                           | 12   | 9038                  | 1             | 16           | L3-L5-L7     | -90.67                                          | 8    | 9626                  | 5             | 4            | L3-L5-L7     |
| 4.1           | 0.573                | -7.919                           | 13   | 9039                  | 5             | 8            | L10-L12      | -81.81                                          | 11   | 9635                  | 12            | 4            | L10-L12      |
| 4.1           | 0.573                | -7.896                           | 14   | 9040                  | 5             | 8            | L10-L12      | -103.68                                         | 3    | 9611                  | 11            | 6            | L10-L12      |
| 4.2           | 0.427                | -7.759                           | 15   | 9042                  | 1             | 16           | L3-L5-L7     | -101.70                                         | 4    | 9614                  | 6             | 5            | L3-L5-L7     |
| 4.3           | 0.573                | -7.451                           | 16   |                       |               |              |              | -71.81                                          | 13   | 9641                  | 9             | 6            | L3-L5-L7     |
| 4.1           | 0.573                | -6.942                           | 17   |                       |               |              |              | -84.28                                          | 10   | 9632                  | 11            | 6            | L10-L12      |
| 4.2           | 0.427                | -5.990                           | 18   |                       |               |              |              | -90.21                                          | 9    | 9629                  | 6             | 5            | L3-L5-L7     |
| 4.3           | 0.573                | -5.712                           | 19   |                       |               |              |              | -59.15                                          | 18   |                       |               |              |              |
| 4.3           | 0.573                | -5.656                           | 20   |                       |               |              |              | -71.91                                          | 12   | 9638                  | 11            | 6            | L10-L12      |
| 4.4           | 0.427                | -4.588                           | 21   |                       |               |              |              | -53.15                                          | 21   |                       |               |              |              |
| 4.4           | 0.427                | -4.252                           | 22   |                       |               |              |              | -50.32                                          | 22   |                       |               |              |              |
| 4.4           | 0.427                | -4.069                           | 23   |                       |               |              |              | -45.11                                          | 23   |                       |               |              |              |

## 5

| Cmpd.<br>variant | Tautomer<br>probability | XP docking                          |      | SIFt based clustering  |                  |                 |                 | MM-GBSA                                            |      | SIFt based clustering  |                  |                 |                 |
|------------------|-------------------------|-------------------------------------|------|------------------------|------------------|-----------------|-----------------|----------------------------------------------------|------|------------------------|------------------|-----------------|-----------------|
|                  |                         | XP gscore<br>kcal mol <sup>-1</sup> | Rank | Entry ID<br>dendrogram | Cluster<br>index | Cluster<br>size | Binding<br>pose | $\Delta G_{\text{bind}}$<br>kcal mol <sup>-1</sup> | Rank | Entry ID<br>dendrogram | Cluster<br>index | Cluster<br>size | Binding<br>pose |
| 5.2              | 0.427                   | -10.095                             | 1    | 9004                   | 1                | 16              | L3-L5-L7        | -103.56                                            | 7    | 9668                   | 7                | 6               | L3-L5-L7        |
| 5.2              | 0.427                   | -10.056                             | 2    | 9005                   | 1                | 16              | L3-L5-L7        | -84.99                                             | 20   |                        |                  |                 |                 |
| 5.2              | 0.427                   | -9.920                              | 3    | 9006                   | 3                | 7               | L3-L10          | -96.87                                             | 9    | 9674                   | 4                | 5               | L3-L10          |
| 5.2              | 0.427                   | -9.814                              | 4    | 9007                   | 1                | 16              | L3-L5-L7        | -88.29                                             | 17   |                        |                  |                 |                 |
| 5.2              | 0.427                   | -9.544                              | 5    | 9009                   | 3                | 7               | L3-L10          | -114.55                                            | 1    | 9650                   | 3                | 4               | L3-L10          |
| 5.2              | 0.427                   | -9.489                              | 6    | 9010                   | 3                | 7               | L3-L10          | -109.70                                            | 4    | 9659                   | 3                | 4               | L3-L10          |
| 5.2              | 0.427                   | -9.468                              | 7    | 9011                   | 1                | 16              | L3-L5-L7        | -104.31                                            | 6    | 9665                   | 6                | 5               | L3-L5-L7        |
| 5.2              | 0.427                   | -9.412                              | 8    | 9014                   | 1                | 16              | L3-L5-L7        | -109.81                                            | 3    | 9656                   | 4*               | 5               | L3-L5-L7        |
| 5.2              | 0.427                   | -9.394                              | 9    | 9015                   | 3                | 7               | L3-L10          | -110.59                                            | 2    | 9653                   | 3                | 4               | L3-L10          |
| 5.2              | 0.427                   | -9.247                              | 10   | 9017                   | 1                | 16              | L3-L5-L7        | -94.86                                             | 14   | 9689                   | 4*               | 5               | L3-L5-L7        |
| 5.1              | 0.573                   | -9.058                              | 11   | 9018                   | 4                | 1               | L3-L10          | -96.55                                             | 10   | 9677                   | 2                | 2               | L3-L10          |
| 5.3              | 0.573                   | -9.032                              | 12   | 9031                   | 5                | 8               | L10-L12         | -76.75                                             | 26   |                        |                  |                 |                 |
| 5.2              | 0.427                   | -8.976                              | 13   | 9021                   | 2                | 13              | L3-L5-L7        | -105.52                                            | 5    | 9662                   | 9                | 6               | L3-L5-L7        |
| 5.3              | 0.573                   | -8.903                              | 14   | 9033                   | 5                | 8               | L10-L12         | -76.80                                             | 25   |                        |                  |                 |                 |
| 5.2              | 0.427                   | -8.891                              | 15   | 9024                   | 2                | 13              | L3-L5-L7        | -82.69                                             | 22   |                        |                  |                 |                 |
| 5.1              | 0.573                   | -8.762                              | 16   |                        |                  |                 |                 | -95.52                                             | 12   | 9683                   | 7                | 6               | L3-L5-L7        |
| 5.4              | 0.427                   | -8.754                              | 17   |                        |                  |                 |                 | -76.83                                             | 24   |                        |                  |                 |                 |
| 5.1              | 0.573                   | -8.740                              | 18   |                        |                  |                 |                 | -74.80                                             | 28   |                        |                  |                 |                 |
| 5.4              | 0.427                   | -8.737                              | 19   |                        |                  |                 |                 | -67.77                                             | 31   |                        |                  |                 |                 |
| 5.1              | 0.573                   | -8.691                              | 20   |                        |                  |                 |                 | -101.38                                            | 8    | 9671                   | 11               | 6               | L10-L12         |
| 5.1              | 0.573                   | -8.675                              | 21   |                        |                  |                 |                 | -95.28                                             | 13   | 9686                   | 2                | 2               | L3-L10          |
| 5.1              | 0.573                   | -8.649                              | 22   |                        |                  |                 |                 | -84.95                                             | 21   |                        |                  |                 |                 |
| 5.1              | 0.573                   | -8.531                              | 23   |                        |                  |                 |                 | -87.25                                             | 18   |                        |                  |                 |                 |
| 5.1              | 0.573                   | -8.483                              | 24   |                        |                  |                 |                 | -89.60                                             | 16   |                        |                  |                 |                 |
| 5.1              | 0.573                   | -8.346                              | 25   |                        |                  |                 |                 | -95.86                                             | 11   | 9680                   | 1                | 1               | —               |
| 5.4              | 0.427                   | -8.207                              | 26   |                        |                  |                 |                 | -49.11                                             | 37   |                        |                  |                 |                 |
| 5.3              | 0.573                   | -8.127                              | 27   |                        |                  |                 |                 | -50.12                                             | 36   |                        |                  |                 |                 |
| 5.4              | 0.427                   | -8.070                              | 28   |                        |                  |                 |                 | -52.10                                             | 34   |                        |                  |                 |                 |
| 5.1              | 0.573                   | -8.061                              | 29   |                        |                  |                 |                 | -77.86                                             | 23   |                        |                  |                 |                 |
| 5.3              | 0.573                   | -7.908                              | 30   |                        |                  |                 |                 | -92.64                                             | 15   | 9692                   | 11               | 6               | L10-L12         |
| 5.1              | 0.573                   | -7.864                              | 31   |                        |                  |                 |                 | -71.35                                             | 30   |                        |                  |                 |                 |
| 5.1              | 0.573                   | -7.606                              | 32   |                        |                  |                 |                 | -71.99                                             | 29   |                        |                  |                 |                 |
| 5.1              | 0.573                   | -7.275                              | 33   |                        |                  |                 |                 | -85.25                                             | 19   |                        |                  |                 |                 |
| 5.1              | 0.573                   | -7.197                              | 34   |                        |                  |                 |                 | -75.33                                             | 27   |                        |                  |                 |                 |
| 5.4              | 0.427                   | -5.843                              | 35   |                        |                  |                 |                 | -45.90                                             | 38   |                        |                  |                 |                 |
| 5.3              | 0.573                   | -4.842                              | 36   |                        |                  |                 |                 | -65.94                                             | 33   |                        |                  |                 |                 |
| 5.3              | 0.573                   | -4.255                              | 37   |                        |                  |                 |                 | -67.29                                             | 32   |                        |                  |                 |                 |
| 5.4              | 0.427                   | -4.213                              | 38   |                        |                  |                 |                 | -51.99                                             | 35   |                        |                  |                 |                 |

| Cmpd.<br>variant | Tautomer<br>probability | XP docking                          |      | SIFt based clustering  |                  |                 |                 | MM-GBSA                                            |      | SIFt based clustering  |                  |                 |                 |
|------------------|-------------------------|-------------------------------------|------|------------------------|------------------|-----------------|-----------------|----------------------------------------------------|------|------------------------|------------------|-----------------|-----------------|
|                  |                         | XP gscore<br>kcal mol <sup>-1</sup> | Rank | Entry ID<br>dendrogram | Cluster<br>index | Cluster<br>size | Binding<br>pose | $\Delta G_{\text{bind}}$<br>kcal mol <sup>-1</sup> | Rank | Entry ID<br>dendrogram | Cluster<br>index | Cluster<br>size | Binding<br>pose |
| 6.2              | 0.427                   | -10.523                             | 1    | 9002                   | 1                | 16              | L3-L5-L7        | -108.57                                            | 3    | 9701                   | 7                | 6               | L3-L5-L7        |
| 6.2              | 0.427                   | -10.226                             | 2    | 9003                   | 1                | 16              | L3-L5-L7        | -82.18                                             | 12   | 9728                   | 7                | 6               | L3-L5-L7        |
| 6.1              | 0.573                   | -9.542                              | 3    | 9008                   | 1                | 16              | L3-L5-L7        | -102.31                                            | 4    | 9704                   | 7                | 6               | L3-L5-L7        |
| 6.2              | 0.427                   | -9.412                              | 4    | 9013                   | 3                | 7               | L3-L10          | -115.16                                            | 2    | 9698                   | 4                | 5               | L3-L10          |
| 6.2              | 0.427                   | -9.308                              | 5    | 9016                   | 3                | 7               | L3-L10          | -116.52                                            | 1    | 9695                   | 3                | 4               | L3-L10          |
| 6.3              | 0.573                   | -9.304                              | 6    | 9028                   | 2                | 13              | L3-L5-L7        | -55.12                                             | 20   |                        |                  |                 |                 |
| 6.3              | 0.573                   | -8.973                              | 7    | 9032                   | 2                | 13              | L3-L5-L7        | -74.05                                             | 17   |                        |                  |                 |                 |
| 6.1              | 0.573                   | -8.887                              | 8    | 9019                   | 2                | 13              | L3-L5-L7        | -74.32                                             | 16   |                        |                  |                 |                 |
| 6.3              | 0.573                   | -8.852                              | 9    | 9035                   | 5                | 8               | L10-L12         | -81.67                                             | 13   | 9731                   | 11               | 6               | L10-L12         |
| 6.1              | 0.573                   | -8.704                              | 10   | 9025                   | 2                | 13              | L3-L5-L7        | -74.77                                             | 15   | 9737                   | 5                | 4               | L3-L5-L7        |
| 6.1              | 0.573                   | -8.458                              | 11   | 9027                   | 2                | 13              | L3-L5-L7        | -96.21                                             | 6    | 9710                   | 9                | 6               | L3-L5-L7        |
| 6.2              | 0.427                   | -8.154                              | 12   | 9037                   | 1                | 16              | L3-L5-L7        | -86.27                                             | 11   | 9725                   | 7                | 6               | L3-L5-L7        |
| 6.3              | 0.573                   | -7.989                              | 13   | 9044                   | 5                | 8               | L10-L12         | -92.66                                             | 9    | 9719                   | 12               | 4               | L10-L12         |
| 6.3              | 0.573                   | -7.934                              | 14   | 9045                   | 5                | 8               | L10-L12         | -75.46                                             | 14   | 9734                   | 10               | 1               | L10-L12         |
| 6.3              | 0.573                   | -7.727                              | 15   | 9046                   | 5                | 8               | L10-L12         | -64.34                                             | 18   |                        |                  |                 |                 |
| 6.3              | 0.573                   | -7.711                              | 16   |                        |                  |                 |                 | -93.88                                             | 7    | 9713                   | 12               | 4               | L10-L12         |
| 6.2              | 0.427                   | -7.638                              | 17   |                        |                  |                 |                 | -98.33                                             | 5    | 9707                   | 9                | 6               | L3-L5-L7        |
| 6.1              | 0.573                   | -7.240                              | 18   |                        |                  |                 |                 | -93.88                                             | 8    | 9716                   | 8                | 1               | L3-L5-L7        |
| 6.3              | 0.573                   | -5.610                              | 19   |                        |                  |                 |                 | -91.77                                             | 10   | 9722                   | 12               | 4               | L10-L12         |
| 6.4              | 0.427                   | -5.528                              | 20   |                        |                  |                 |                 | -55.43                                             | 19   |                        |                  |                 |                 |
| 6.4              | 0.427                   | -4.212                              | 21   |                        |                  |                 |                 | -50.74                                             | 22   |                        |                  |                 |                 |
| 6.4              | 0.427                   | -4.182                              | 22   |                        |                  |                 |                 | -46.21                                             | 23   |                        |                  |                 |                 |
| 6.4              | 0.427                   | -4.139                              | 23   |                        |                  |                 |                 | -51.17                                             | 21   |                        |                  |                 |                 |

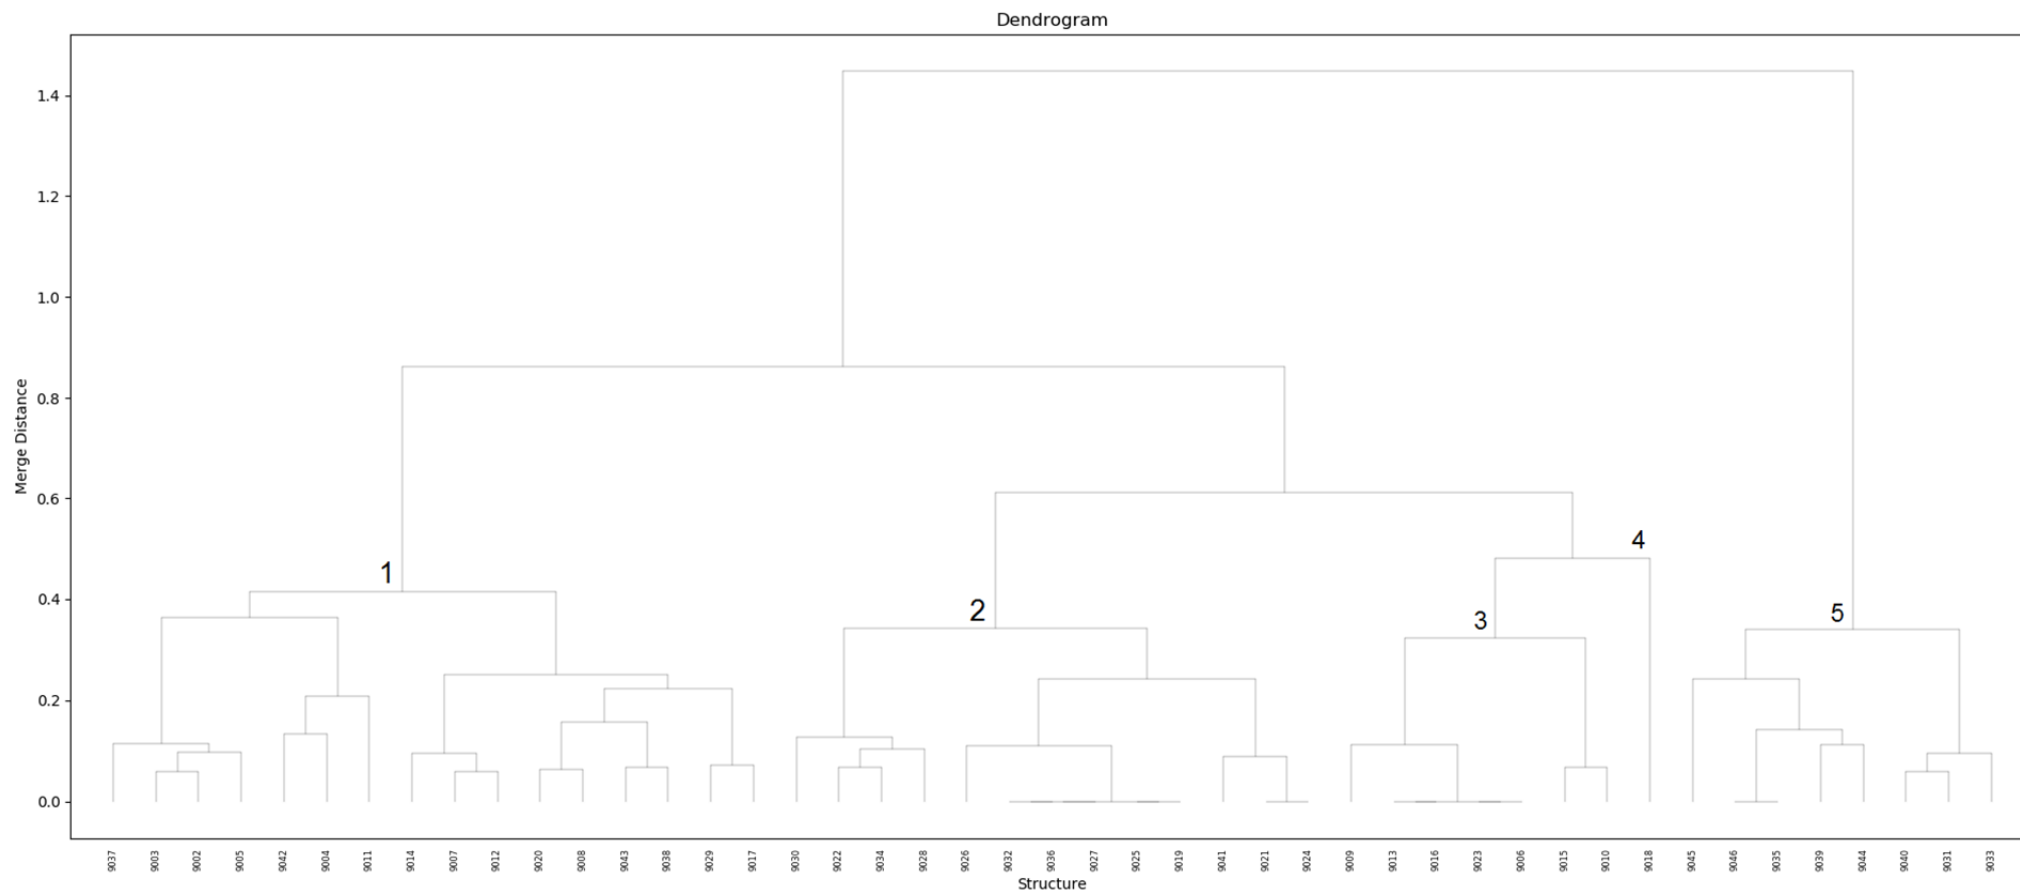

**Figure S17.** Hierarchical clustering of SIFTs generated for the top fifteen ranked docking poses, based on the XP gscore, of **4–6**. Clusters 1 and 2 correspond to L3-L5-L7 poses (65%), clusters 3 and 4 correspond to L3-L10 poses (18%), and cluster 5 corresponds to L10-L12 poses (18%).

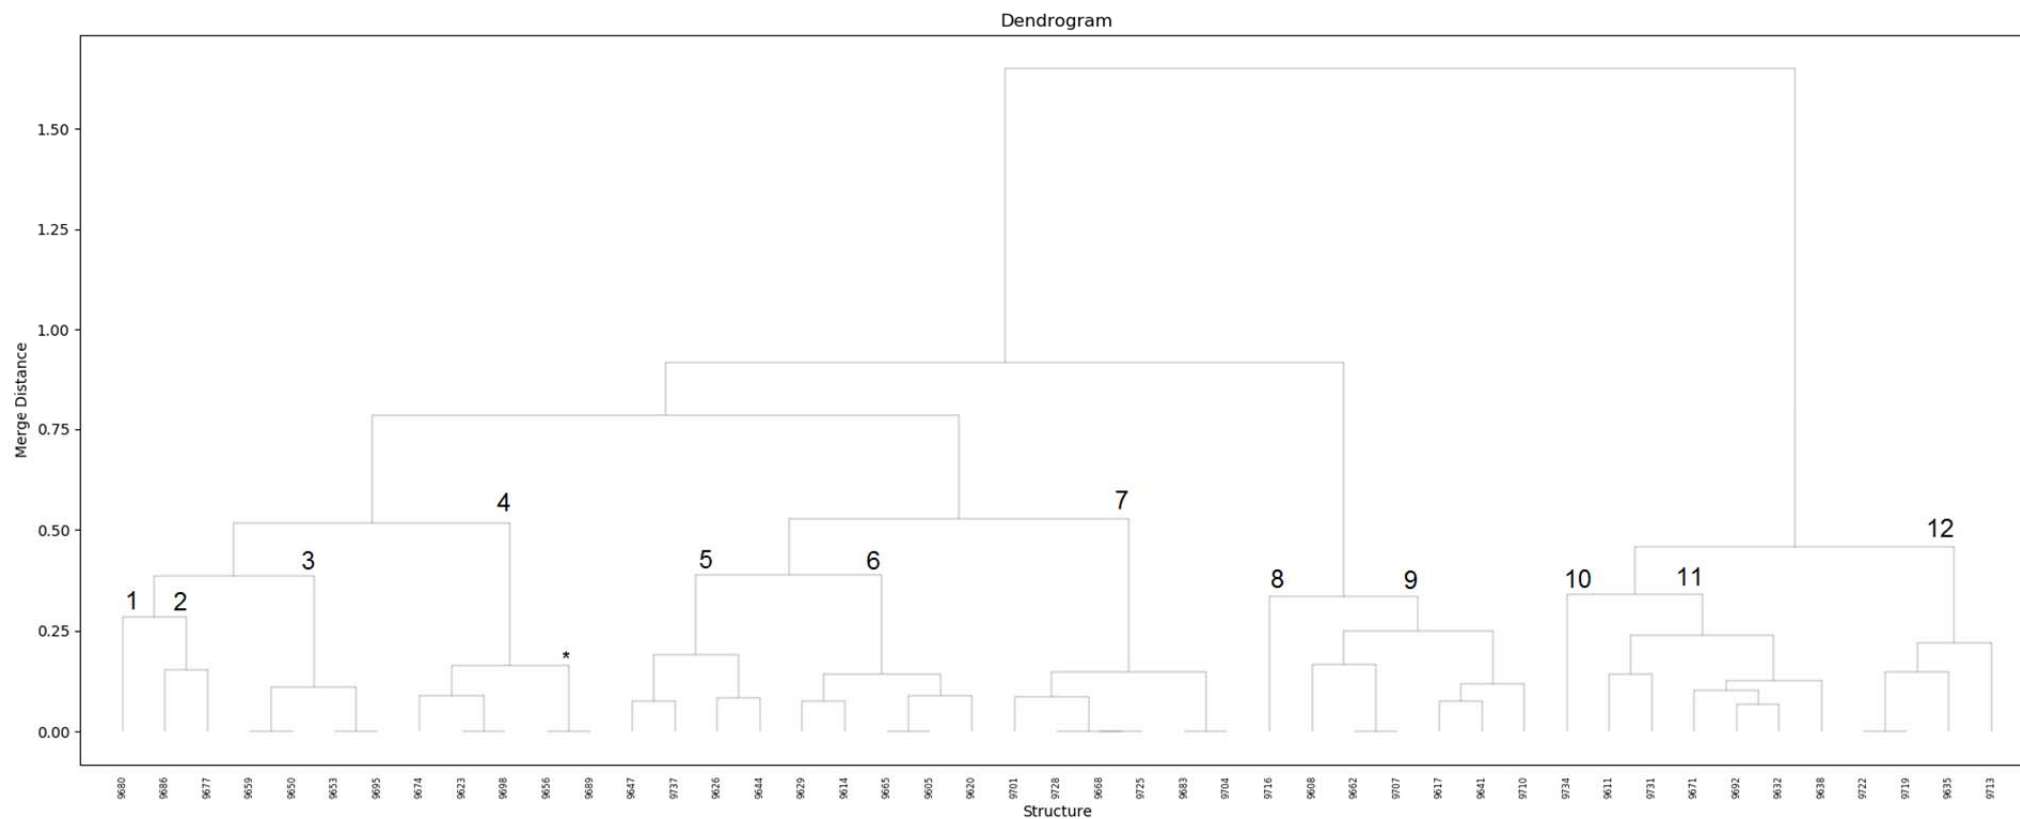

**Figure S18.** Hierarchical clustering of SIFts generated for the top fifteen ranked docking poses, based on the MM-GBSA binding free energies, of **4–6**. Cluster 1 corresponds to a minor pose(2%), clusters 2–4 correspond to L3-L10 poses (20%), clusters 4\* and 5–9 correspond to L3-L5-L7 poses (53%), and clusters 10–12 correspond to L10-L12 poses (24%).

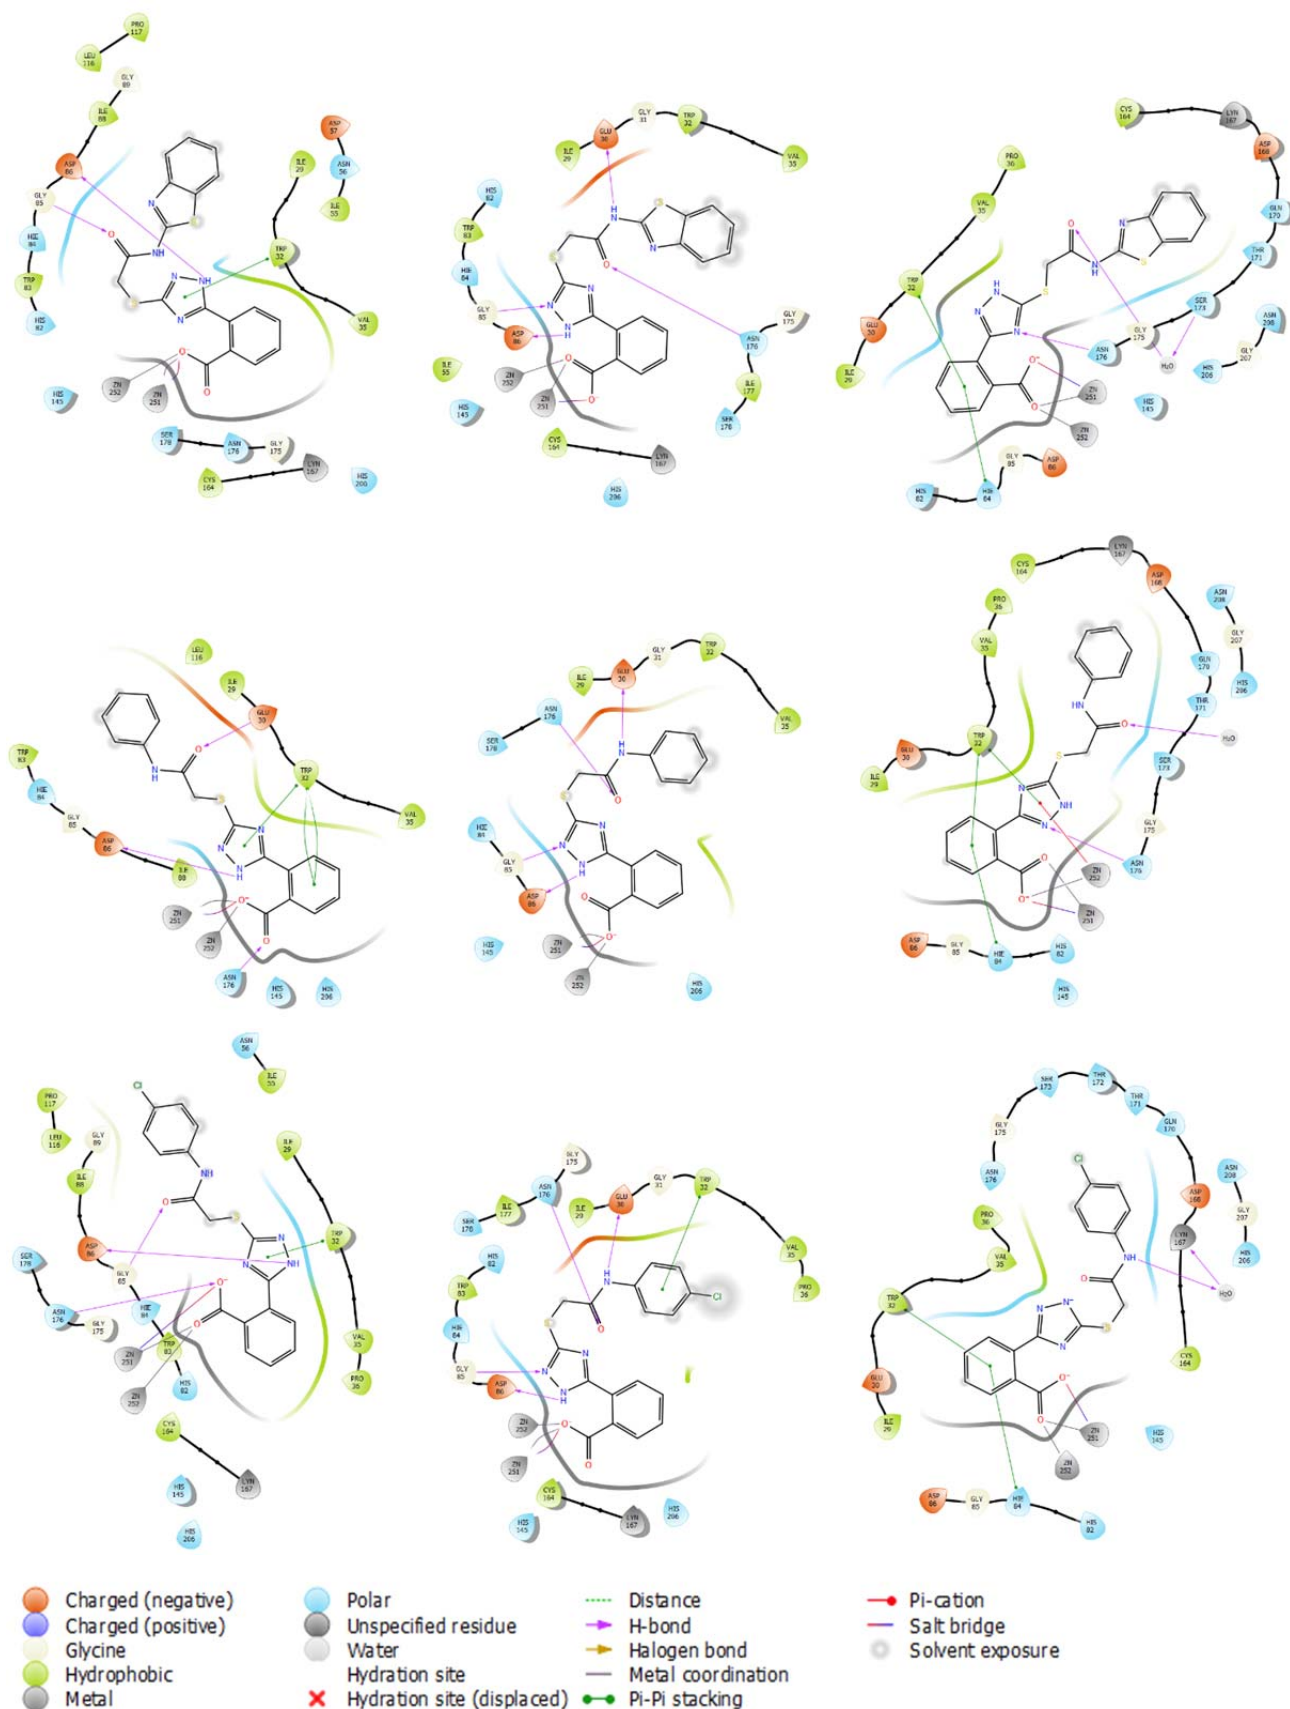

**Figure S19.** Ligand interaction diagrams for the top scoring pose (MM-GBSA, PDB 1A8T<sup>2</sup>) of **4** (top), **5** (middle) and **6** (bottom) in L3-L5-L7 (left), L3-L10 (middle) and L10-L12 (right) binding poses, respectively.

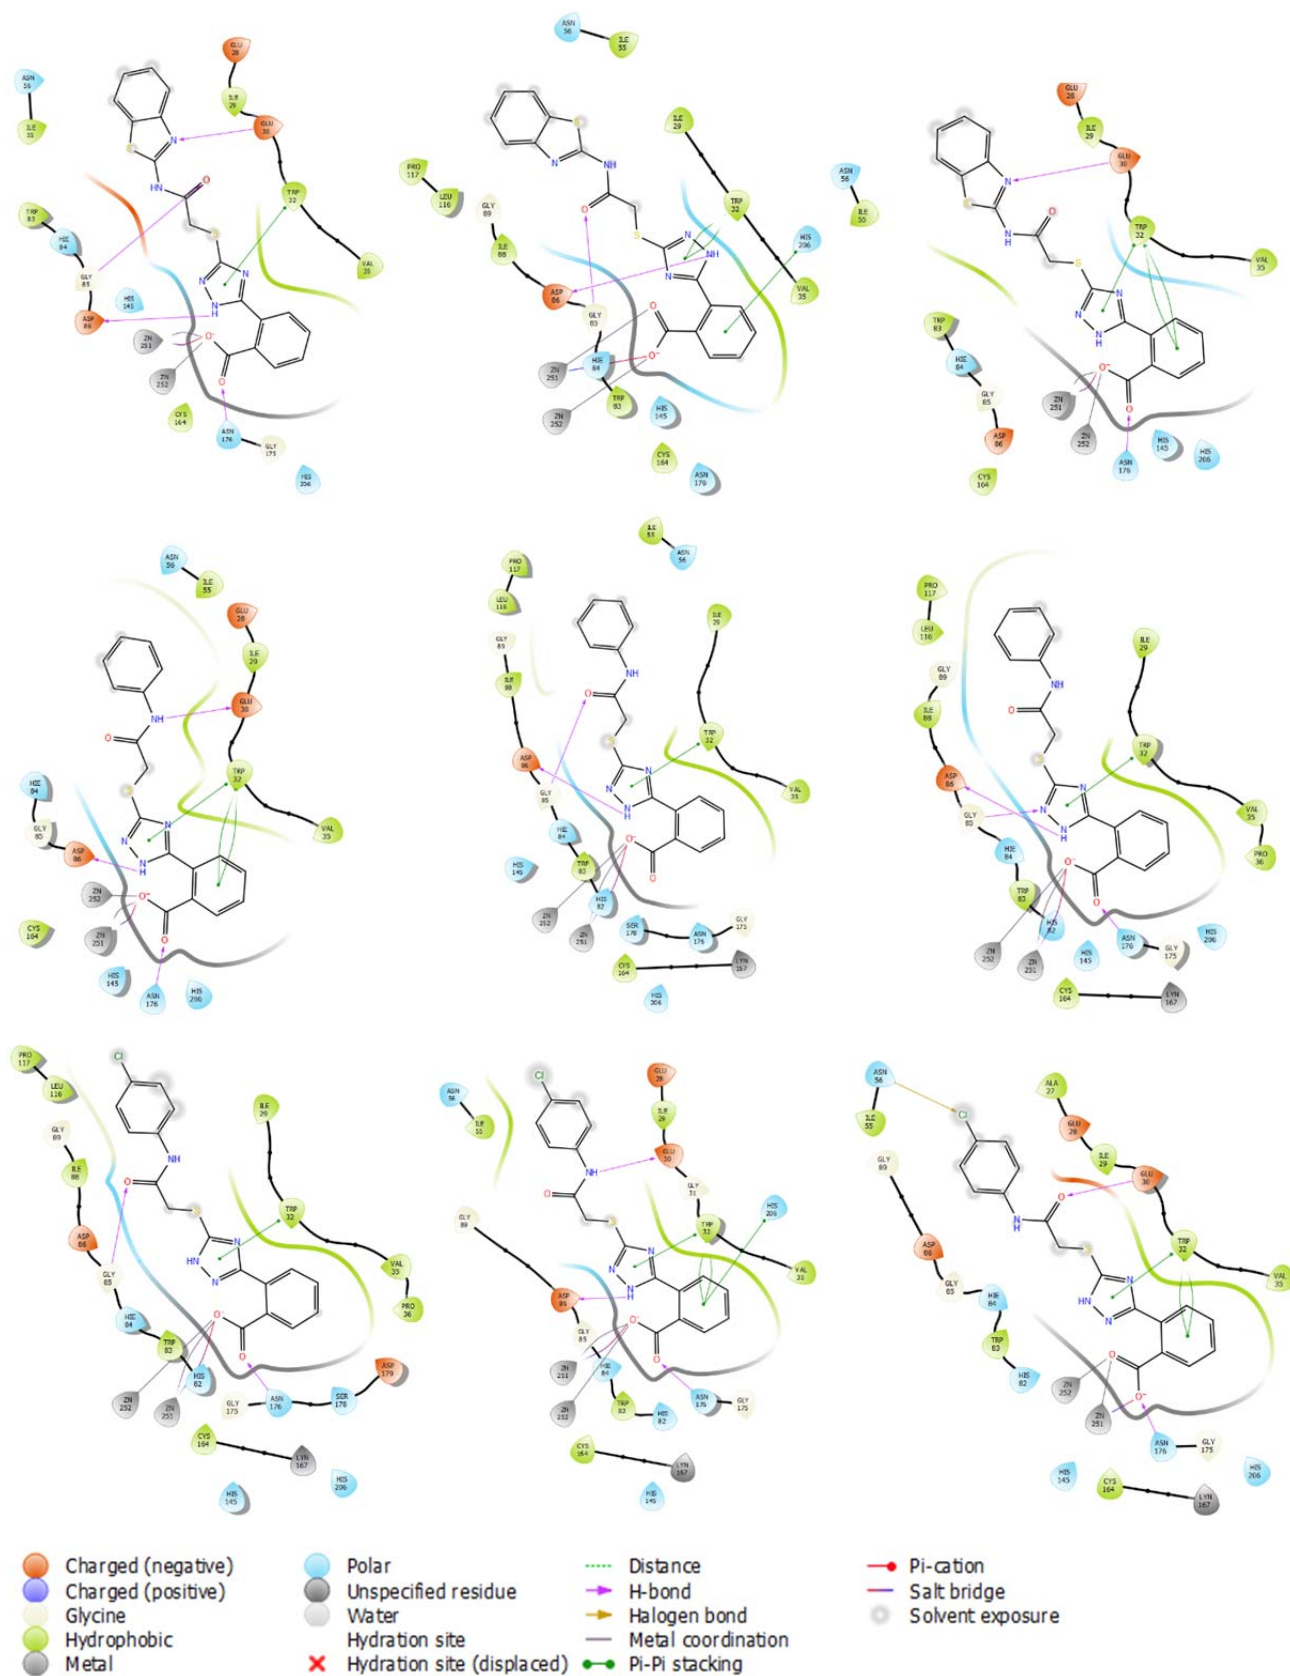

**Figure S20.** Ligand interaction diagrams for the L3-L5-L7 poses ranked as second (left), third (middle) and fourth (right) best (MM-GBSA, PDB 1A8T<sup>2</sup>), of **4** (top), **5** (middle) and **6** (bottom), respectively.

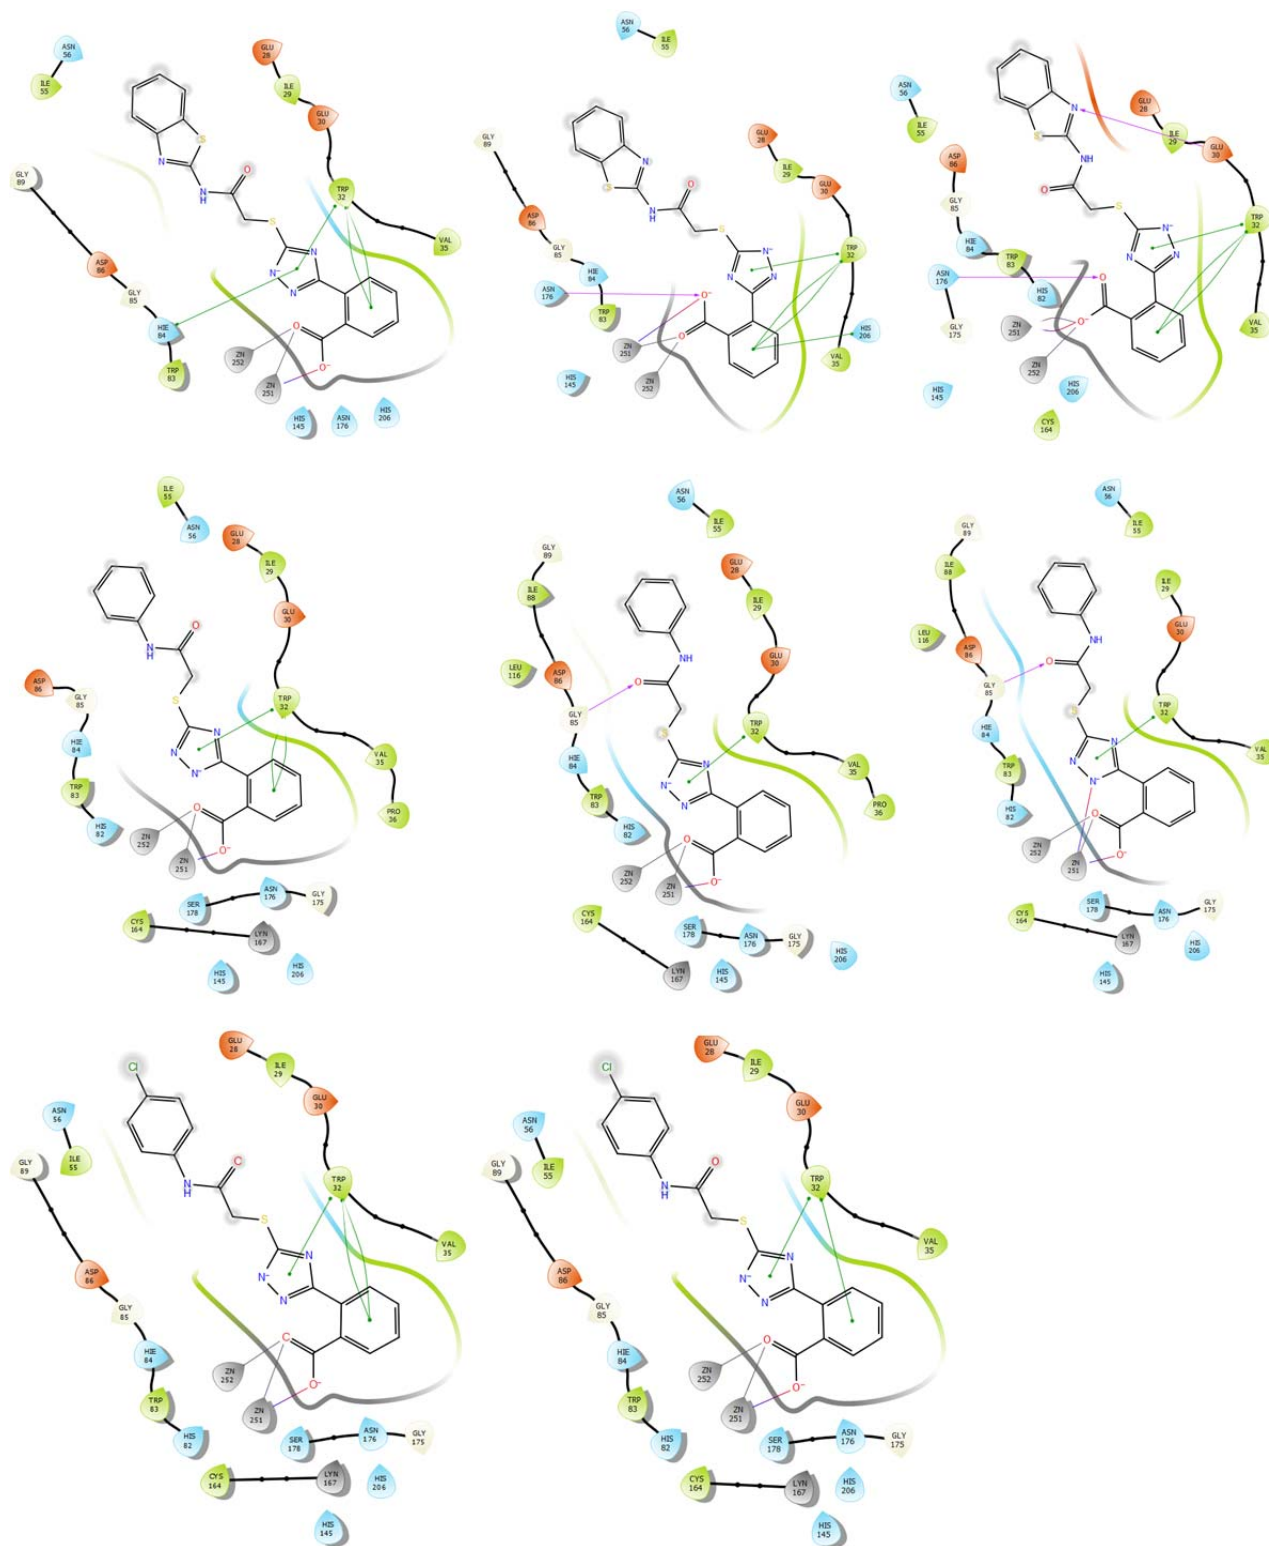

**Figure S21.** Ligand interaction diagrams for the top scoring L3-L5-L7 poses (MM-GBSA, PDB 1A8T<sup>2</sup>), of **4** (top), **5** (middle) and **6** (bottom), where the triazole moiety of the compounds are deprotonated. For **4**, the poses ranked as number 13 (left), 15 (middle) and 19 (right) are shown. For **5**, the poses ranked as number 24 (left) 36 (middle) and 37 (right) are shown. For **6**, the poses ranked as number 17 (left) and 20 (right) are shown.

### 3.4 Prediction of aqueous pKa values for 1–10

Epik (Schrödinger, LLC, New York, NY, 2020) was used for empirical predictions of aqueous pKa values. As shown in Table S15, *1H*-1,2,4-triazole tautomer **B** (or the corresponding deprotonated form) was the main tautomeric form among the top ranked L3-L5-L7 binding poses for **1**, **2**, **7**, **8** and **10** (Table S11), whereas for **9** it was *1H*-1,2,4-triazole tautomer **A**. The predicted pKa values for the triazole, and the substituents on the aryl moieties (Ar) in **1**, **2** and **7–10** are higher with the 1,2,4-triazole in tautomeric form **B** than in tautomeric form **A**.

**Table S11.** Aqueous pKa values at pH 7 predicted for *1H*-1,2,4-triazole tautomer **A** and **B** of **1–10**.

| Cmpd      | Ar' | Ar | pK <sub>a</sub> |           |           |             |           |           |
|-----------|-----|----|-----------------|-----------|-----------|-------------|-----------|-----------|
|           |     |    | A               |           |           | B           |           |           |
|           |     |    | Triazole NH     | Ar OH     | Ar COOH   | Triazole NH | Ar OH     | Ar COOH   |
| <b>1</b>  |     |    | 7.5 ± 2.2       | 8.9 ± 0.7 |           | 10.5 ± 2.2  | 9.4 ± 0.7 |           |
| <b>2</b>  |     |    |                 |           |           |             |           |           |
| <b>3</b>  |     |    | 7.0 ± 2.2       |           |           | 10.1 ± 2.2  |           |           |
| <b>4</b>  |     |    |                 |           |           |             |           |           |
| <b>5</b>  |     |    | 7.6 ± 2.2       |           | 3.7 ± 0.6 | 10.5 ± 2.2  |           | 3.9 ± 0.7 |
| <b>6</b>  |     |    |                 |           |           |             |           |           |
| <b>7</b>  |     |    | 6.9 ± 2.2       | 0.2 ± 2.0 |           | 8.8 ± 2.2   | 0.8 ± 2.0 |           |
| <b>8</b>  |     |    |                 |           |           |             |           |           |
| <b>9</b>  |     |    | 6.9 ± 2.2       | 0.1 ± 2.0 |           | 8.8 ± 2.2   | 0.6 ± 2.0 |           |
| <b>10</b> |     |    |                 |           |           |             |           |           |

### 3.5 Molecular docking, MM-GBSA rescoring and SIFt based clustering of 1–3 and 7–10

Compounds **1–3** and **7–10** were investigated by molecular docking as described in the general information. The ionization state and tautomer variants generated by LigPrep are shown in Table S12. In line with previous data, one or both of the two *1H*-1,2,4-tautomers, and often also its deprotonated forms, were predicted by LigPrep, but not the less stable *4H*-1,2,4-tautomer or its deprotonated form.<sup>30</sup> The docking scores (XP gscore and MM-GBSA) and the results from the SIFt based clustering are presented in Table S13.

**Table S12.** Ionization state and tautomer variants of CcrA inhibitors **1–3** and the prospective inhibitors **7–10** generated by LigPrep and submitted to docking into CcrA.

| Cmpd (X)  | Variant |     |     |     |     |     |     |     |
|-----------|---------|-----|-----|-----|-----|-----|-----|-----|
|           | X.1     | X.2 | X.3 | X.4 | X.5 | X.6 | X.7 | X.8 |
| <b>1</b>  |         |     |     |     |     |     |     |     |
| <b>2</b>  |         |     |     |     |     |     |     |     |
| <b>3</b>  |         |     |     |     |     |     |     |     |
| <b>7</b>  |         |     |     |     |     |     |     |     |
| <b>8</b>  |         |     |     |     |     |     |     |     |
| <b>9</b>  |         |     |     |     |     |     |     |     |
| <b>10</b> |         |     |     |     |     |     |     |     |

**Table S13.** A summary of the results from the molecular docking, MM-GBSA rescoring and SIFt based clustering of **1–3** and **7–10** divided into seven sub tables labeled accordingly. Top ranked pose (MM-GBSA) among each of the main clusters of binding poses are marked with bold squares.

| <b>1</b> <i>Phenols</i> |                      | XP docking                       |      | SIFt based clustering | MM-GBSA                                         |      | SIFt based clustering |
|-------------------------|----------------------|----------------------------------|------|-----------------------|-------------------------------------------------|------|-----------------------|
| Cmpd. variant           | Tautomer probability | XP gscore kcal mol <sup>-1</sup> | Rank | Binding pose          | $\Delta G_{\text{bind}}$ kcal mol <sup>-1</sup> | Rank | Binding pose          |
| 1.2                     | 0.427                | -4.832                           | 1    | L3-L5-L7              | -74.81                                          | 2    | L3-L5-L7              |
| 1.4                     |                      | -4.786                           | 2    | L10-L12               | -52.20                                          | 10   | L10-L12               |
| 1.4                     |                      | -4.688                           | 3    | L10-L12               | -55.79                                          | 7    | L10-L12               |
| 1.3                     | 0.573                | -4.510                           | 4    | L3-L5-L7              | -47.98                                          | 16   |                       |
| 1.1                     | 0.573                | -4.341                           | 5    | L3-L5-L7              | -68.24                                          | 5    | L3-L5-L7              |
| 1.4                     |                      | -4.273                           | 6    | L10-L12               | -77.95                                          | 1    | L10-L12               |
| 1.2                     | 0.427                | -4.177                           | 7    | L3-L5-L7              | -71.33                                          | 4    | L3-L5-L7              |
| 1.2                     | 0.427                | -4.131                           | 8    | L3-L5-L7              | -72.51                                          | 3    | L3-L5-L7              |
| 1.4                     |                      | -4.064                           | 9    | L10-L12               | -50.77                                          | 11   |                       |
| 1.2                     | 0.427                | -3.734                           | 10   |                       | -65.04                                          | 6    | L3-L10                |
| 1.1                     | 0.573                | -3.597                           | 11   |                       | -50.41                                          | 12   |                       |
| 1.4                     |                      | -3.487                           | 12   |                       | -55.52                                          | 8    | L10-L12               |
| 1.4                     |                      | -3.480                           | 13   |                       | -48.41                                          | 14   |                       |
| 1.4                     |                      | -3.335                           | 14   |                       | -48.29                                          | 15   |                       |
| 1.3                     | 0.573                | -3.322                           | 15   |                       | -49.25                                          | 13   |                       |
| 1.3                     | 0.573                | -3.286                           | 16   |                       | -42.06                                          | 17   |                       |
| 1.4                     |                      | -3.154                           | 17   |                       | -55.34                                          | 9    | L10-L12               |

| <b>1</b> <i>Phenolate anions</i> |                      | XP docking                       |      | SIFt based clustering | MM-GBSA                                         |      | SIFt based clustering |
|----------------------------------|----------------------|----------------------------------|------|-----------------------|-------------------------------------------------|------|-----------------------|
| Cmpd. variant                    | Tautomer probability | XP gscore kcal mol <sup>-1</sup> | Rank | Binding pose          | $\Delta G_{\text{bind}}$ kcal mol <sup>-1</sup> | Rank | Binding pose          |
| 1.6                              |                      | -9.001                           | 1    | L3-L5-L7              | -53.55                                          | 18   |                       |
| 1.7                              |                      | -8.896                           | 2    | L3-L10                | -46.52                                          | 27   |                       |
| 1.7                              |                      | -8.876                           | 3    | L3-L5-L7              | -52.43                                          | 20   |                       |
| 1.6                              |                      | -8.869                           | 4    | L3-L5-L7              | -65.23                                          | 6    | L3-L5-L7              |
| 1.6                              |                      | -8.757                           | 5    | L3-L5-L7              | -60.83                                          | 9    | L3-L5-L7              |
| 1.5                              |                      | -8.327                           | 6    | L10-L12               | -62.09                                          | 8    | L10-L12               |
| 1.5                              |                      | -8.313                           | 7    | L10-L12               | -58.66                                          | 11   |                       |
| 1.6                              |                      | -8.276                           | 8    | L3-L5-L7              | -56.89                                          | 13   |                       |
| 1.8                              |                      | -8.268                           | 9    | L10-L12               | -34.24                                          | 41   |                       |
| 1.6                              |                      | -8.258                           | 10   | L3-L5-L7              | -39.11                                          | 38   |                       |
| 1.5                              |                      | -8.228                           | 11   |                       | -73.68                                          | 4    | L10-L12               |
| 1.5                              |                      | -8.165                           | 12   |                       | -57.28                                          | 12   |                       |
| 1.5                              |                      | -8.130                           | 13   |                       | -79.43                                          | 1    | L10-L12               |
| 1.8                              |                      | -8.118                           | 14   |                       | -48.89                                          | 25   |                       |
| 1.8                              |                      | -8.003                           | 15   |                       | -26.97                                          | 43   |                       |
| 1.8                              |                      | -7.997                           | 16   |                       | -66.59                                          | 5    | L10-L12               |
| 1.7                              |                      | -7.881                           | 17   |                       | -46.40                                          | 28   |                       |
| 1.5                              |                      | -7.850                           | 18   |                       | -49.10                                          | 24   |                       |
| 1.8                              |                      | -7.815                           | 19   |                       | -39.16                                          | 37   |                       |
| 1.7                              |                      | -7.653                           | 20   |                       | -26.58                                          | 44   |                       |
| 1.5                              |                      | -7.610                           | 21   |                       | -53.37                                          | 19   |                       |
| 1.8                              |                      | -7.603                           | 22   |                       | -9.18                                           | 46   |                       |
| 1.8                              |                      | -7.594                           | 23   |                       | -36.36                                          | 40   |                       |
| 1.5                              |                      | -7.524                           | 24   |                       | -77.11                                          | 3    | L10-L12               |
| 1.7                              |                      | -7.408                           | 25   |                       | -27.69                                          | 42   |                       |
| 1.5                              |                      | -7.365                           | 26   |                       | -54.31                                          | 17   |                       |
| 1.8                              |                      | -7.362                           | 27   |                       | -64.99                                          | 7    | L10-L12               |
| 1.8                              |                      | -7.310                           | 28   |                       | -41.00                                          | 34   |                       |
| 1.8                              |                      | -7.307                           | 29   |                       | -51.66                                          | 22   |                       |
| 1.8                              |                      | -7.288                           | 30   |                       | -40.37                                          | 35   |                       |
| 1.5                              |                      | -7.286                           | 31   |                       | -79.02                                          | 2    | L10-L12               |
| 1.8                              |                      | -7.253                           | 32   |                       | -58.86                                          | 10   | L10-L12               |
| 1.5                              |                      | -7.249                           | 33   |                       | -55.94                                          | 14   |                       |
| 1.8                              |                      | -7.235                           | 34   |                       | -37.35                                          | 39   |                       |
| 1.8                              |                      | -7.228                           | 35   |                       | -48.71                                          | 26   |                       |
| 1.5                              |                      | -7.177                           | 36   |                       | -43.69                                          | 29   |                       |
| 1.7                              |                      | -7.175                           | 37   |                       | -42.48                                          | 33   |                       |
| 1.8                              |                      | -7.037                           | 38   |                       | -52.40                                          | 21   |                       |
| 1.7                              |                      | -7.014                           | 39   |                       | -49.19                                          | 23   |                       |
| 1.8                              |                      | -6.957                           | 40   |                       | -21.73                                          | 45   |                       |
| 1.8                              |                      | -6.713                           | 41   |                       | -55.47                                          | 15   |                       |
| 1.7                              |                      | -6.694                           | 42   |                       | -42.49                                          | 32   |                       |
| 1.7                              |                      | -6.574                           | 43   |                       | -42.92                                          | 30   |                       |
| 1.7                              |                      | -5.244                           | 44   |                       | -42.91                                          | 31   |                       |
| 1.7                              |                      | -4.729                           | 45   |                       | -39.54                                          | 36   |                       |
| 1.7                              |                      | -4.441                           | 46   |                       | -55.23                                          | 16   |                       |

| 2 Phenols     |                      | XP docking                       |      | SIFt based clustering | MM-GBSA                                         |      | SIFt based clustering |
|---------------|----------------------|----------------------------------|------|-----------------------|-------------------------------------------------|------|-----------------------|
| Cmpd. variant | Tautomer probability | XP gscore kcal mol <sup>-1</sup> | Rank | Binding pose          | $\Delta G_{\text{bind}}$ kcal mol <sup>-1</sup> | Rank | Binding pose          |
| 2.4           | 0.427                | -5.571                           | 1    | L3-L5-L7              | -56.28                                          | 15   |                       |
| 2.3           | 0.573                | -5.548                           | 2    | L3-L5-L7              | -72.30                                          | 2    | L3-L5-L7              |
| 2.3           | 0.573                | -5.532                           | 3    | L3-L5-L7              | -71.24                                          | 3    | L3-L5-L7              |
| 2.3           | 0.573                | -5.396                           | 4    | L3-L5-L7              | -46.12                                          | 22   |                       |
| 2.3           | 0.573                | -5.262                           | 5    | L7(Trp83)             | -39.23                                          | 31   |                       |
| 2.1           | 0.573                | -4.801                           | 6    | L3-L5-L7              | -68.20                                          | 4    | L3-L5-L7              |
| 2.3           | 0.573                | -4.643                           | 7    | L7(Trp83)             | -34.86                                          | 34   |                       |
| 2.2           | 0.427                | -4.562                           | 8    | L3-L5-L7              | -39.83                                          | 30   |                       |
| 2.1           | 0.573                | -4.537                           | 9    | L3-L5-L7              | -56.14                                          | 16   |                       |
| 2.4           | 0.427                | -4.460                           | 10   | L3-L5-L7              | -40.49                                          | 29   |                       |
| 2.3           | 0.573                | -4.128                           | 11   |                       | -63.76                                          | 6    | L7(Trp83)             |
| 2.1           | 0.573                | -4.119                           | 12   |                       | -61.31                                          | 9    | L3-L10                |
| 2.3           | 0.573                | -4.089                           | 13   |                       | -36.80                                          | 33   |                       |
| 2.1           | 0.573                | -4.083                           | 14   |                       | -59.03                                          | 12   |                       |
| 2.1           | 0.573                | -3.933                           | 15   |                       | -74.28                                          | 1    | L10-L12               |
| 2.1           | 0.573                | -3.823                           | 16   |                       | -46.94                                          | 21   |                       |
| 2.1           | 0.573                | -3.809                           | 17   |                       | -67.54                                          | 5    | L10-L12               |
| 2.1           | 0.573                | -3.789                           | 18   |                       | -43.14                                          | 25   |                       |
| 2.2           | 0.427                | -3.773                           | 19   |                       | -43.45                                          | 24   |                       |
| 2.2           | 0.427                | -3.706                           | 20   |                       | -60.89                                          | 10   | L3-L10                |
| 2.1           | 0.573                | -3.640                           | 21   |                       | -59.59                                          | 11   | L3-L5-L7              |
| 2.4           | 0.427                | -3.597                           | 22   |                       | -54.37                                          | 17   |                       |
| 2.1           | 0.573                | -3.544                           | 23   |                       | -61.49                                          | 8    |                       |
| 2.4           | 0.427                | -3.520                           | 24   |                       | -42.08                                          | 26   |                       |
| 2.4           | 0.427                | -3.517                           | 25   |                       | -50.08                                          | 19   |                       |
| 2.1           | 0.573                | -3.490                           | 26   |                       | -61.67                                          | 7    | L7(Trp83)             |
| 2.4           | 0.427                | -3.462                           | 27   |                       | -51.39                                          | 18   |                       |
| 2.3           | 0.573                | -3.459                           | 28   |                       | -38.28                                          | 32   |                       |
| 2.1           | 0.573                | -3.455                           | 29   |                       | -44.76                                          | 23   |                       |
| 2.3           | 0.573                | -3.340                           | 30   |                       | -48.29                                          | 20   |                       |
| 2.4           | 0.427                | -3.295                           | 31   |                       | -41.91                                          | 27   |                       |
| 2.1           | 0.573                | -3.283                           | 32   |                       | -41.47                                          | 28   |                       |
| 2.1           | 0.573                | -3.277                           | 33   |                       | -58.24                                          | 13   |                       |
| 2.1           | 0.573                | -3.059                           | 34   |                       | -57.92                                          | 14   |                       |

| 2 <i>Phenolate anions</i> |                      | XP docking                       |      | SIFt based clustering | MM-GBSA                                         |      | SIFt based clustering |
|---------------------------|----------------------|----------------------------------|------|-----------------------|-------------------------------------------------|------|-----------------------|
| Cmpd. variant             | Tautomer probability | XP gscore kcal mol <sup>-1</sup> | Rank | Binding pose          | $\Delta G_{\text{bind}}$ kcal mol <sup>-1</sup> | Rank | Binding pose          |
| 2.6                       | 0.427                | -9.117                           | 1    | L3-L5-L7              | -50.05                                          | 22   |                       |
| 2.8                       | 0.427                | -8.868                           | 2    | L3-L5-L7              | -32.64                                          | 36   |                       |
| 2.6                       | 0.427                | -8.742                           | 3    | L3-L10                | -56.23                                          | 17   |                       |
| 2.6                       | 0.427                | -8.693                           | 4    | L3-L5-L7              | -68.62                                          | 11   |                       |
| 2.5                       | 0.573                | -8.634                           | 5    | L10-L12               | -54.93                                          | 20   |                       |
| 2.6                       | 0.427                | -8.617                           | 6    | L3-L5-L7              | -81.67                                          | 1    | L3-L5-L7              |
| 2.7                       | 0.573                | -8.572                           | 7    | L10-L12               | -45.36                                          | 28   |                       |
| 2.7                       | 0.573                | -8.506                           | 8    | L10-L12               | -30.03                                          | 40   |                       |
| 2.8                       | 0.427                | -8.489                           | 9    | L10-L12               | -29.54                                          | 41   |                       |
| 2.8                       | 0.427                | -8.422                           | 10   | L3-L5-L7              | -49.81                                          | 23   |                       |
| 2.7                       | 0.573                | -8.413                           | 11   |                       | -32.18                                          | 37   |                       |
| 2.8                       | 0.427                | -8.409                           | 12   |                       | -31.28                                          | 39   |                       |
| 2.6                       | 0.427                | -8.344                           | 13   |                       | -52.25                                          | 21   |                       |
| 2.6                       | 0.427                | -8.318                           | 14   |                       | -68.80                                          | 10   | L7(Trp83)             |
| 2.6                       | 0.427                | -8.308                           | 15   |                       | -68.46                                          | 12   |                       |
| 2.7                       | 0.573                | -8.248                           | 16   |                       | -48.82                                          | 24   |                       |
| 2.6                       | 0.427                | -8.215                           | 17   |                       | -80.60                                          | 2    | L3-L10                |
| 2.5                       | 0.573                | -8.147                           | 18   |                       | -70.51                                          | 7    | L3-L5-L7              |
| 2.5                       | 0.573                | -8.119                           | 19   |                       | -59.88                                          | 14   |                       |
| 2.8                       | 0.427                | -8.101                           | 20   |                       | -47.06                                          | 26   |                       |
| 2.6                       | 0.427                | -8.074                           | 21   |                       | -62.04                                          | 13   |                       |
| 2.7                       | 0.573                | -8.009                           | 22   |                       | -29.40                                          | 42   |                       |
| 2.5                       | 0.573                | -7.928                           | 23   |                       | -55.32                                          | 18   |                       |
| 2.6                       | 0.427                | -7.786                           | 24   |                       | -72.65                                          | 6    | L3-L10                |
| 2.7                       | 0.573                | -7.772                           | 25   |                       | -42.01                                          | 31   |                       |
| 2.5                       | 0.573                | -7.750                           | 26   |                       | -74.16                                          | 5    | L10-L12               |
| 2.8                       | 0.427                | -7.704                           | 27   |                       | -34.82                                          | 35   |                       |
| 2.6                       | 0.427                | -7.658                           | 28   |                       | -79.74                                          | 3    | L3-L10                |
| 2.5                       | 0.573                | -7.640                           | 29   |                       | -56.57                                          | 16   |                       |
| 2.7                       | 0.573                | -7.623                           | 30   |                       | -29.28                                          | 43   |                       |
| 2.8                       | 0.427                | -7.603                           | 31   |                       | -44.80                                          | 30   |                       |
| 2.6                       | 0.427                | -7.584                           | 32   |                       | -47.19                                          | 25   |                       |
| 2.7                       | 0.573                | -7.570                           | 33   |                       | -31.54                                          | 38   |                       |
| 2.7                       | 0.573                | -7.529                           | 34   |                       | -37.14                                          | 34   |                       |
| 2.8                       | 0.427                | -7.496                           | 35   |                       | -44.83                                          | 29   |                       |
| 2.7                       | 0.573                | -7.485                           | 36   |                       | -41.07                                          | 32   |                       |
| 2.5                       | 0.573                | -7.475                           | 37   |                       | -68.96                                          | 9    | L10-L12               |
| 2.5                       | 0.573                | -7.416                           | 38   |                       | -76.15                                          | 4    | L10-L12               |
| 2.5                       | 0.573                | -7.409                           | 39   |                       | -55.10                                          | 19   |                       |
| 2.5                       | 0.573                | -7.387                           | 40   |                       | -57.33                                          | 15   |                       |
| 2.5                       | 0.573                | -7.379                           | 41   |                       | -70.41                                          | 8    | L10-L12               |
| 2.7                       | 0.573                | -7.368                           | 42   |                       | -22.79                                          | 44   |                       |
| 2.6                       | 0.427                | -6.901                           | 43   |                       | -37.42                                          | 33   |                       |
| 2.8                       | 0.427                | -3.621                           | 44   |                       | -46.75                                          | 27   |                       |

| 3             |                      | XP docking                       |      | SIFt based clustering | MM-GBSA                                         |      | SIFt based clustering |
|---------------|----------------------|----------------------------------|------|-----------------------|-------------------------------------------------|------|-----------------------|
| Cmpd. variant | Tautomer probability | XP gscore kcal mol <sup>-1</sup> | Rank | Binding pose          | $\Delta G_{\text{bind}}$ kcal mol <sup>-1</sup> | Rank | Binding pose          |
| 3.2           | 0.427                | -4.912                           | 1    | L10-L12               | -68.86                                          | 4    | L10-L12               |
| 3.2           | 0.427                | -4.830                           | 2    | L10-L12               | -49.34                                          | 13   |                       |
| 3.2           | 0.427                | -4.576                           | 3    | L10-L12               | -67.65                                          | 5    | L10-L12               |
| 3.2           | 0.427                | -4.491                           | 4    | L7(Trp83)             | -72.15                                          | 2    | L7(Trp83)             |
| 3.1           | 0.573                | -4.383                           | 5    | L7(Trp83)             | -49.77                                          | 12   |                       |
| 3.2           | 0.427                | -4.352                           | 6    | L10-L12               | -57.11                                          | 9    | L10-L12               |
| 3.3           | 0.573                | -4.296                           | 7    | L3-L5-L7*             | -55.16                                          | 11   | L3-L5-L7*             |
| 3.2           | 0.427                | -4.214                           | 8    | L7(Trp83)             | -77.42                                          | 1    | L7(Trp83)             |
| 3.1           | 0.573                | -4.152                           | 9    | L7(Trp83)             | -57.77                                          | 8    | L7(Trp83)             |
| 3.3           | 0.573                | -3.914                           | 10   |                       | -46.63                                          | 14   |                       |
| 3.2           | 0.427                | -3.798                           | 11   |                       | -69.84                                          | 3    | L10-L12               |
| 3.1           | 0.573                | -3.748                           | 12   |                       | -65.51                                          | 6    | L10-L12               |
| 3.2           | 0.427                | -3.471                           | 13   |                       | -46.13                                          | 15   |                       |
| 3.2           | 0.427                | -3.325                           | 14   |                       | -63.93                                          | 7    | L7(Trp83)             |
| 3.3           | 0.573                | -3.116                           | 15   |                       | -24.48                                          | 16   |                       |
| 3.1           | 0.573                | -3.029                           | 16   |                       | -56.29                                          | 10   | L10-L12               |

L3-L5-L7\* = flipped Binding pose with the benzothiazole in the catalytic zinc site and the pyridine in the L3-L5-L7 binding site

| 7             |                      | XP docking                       |      | SIFt based clustering | MM-GBSA                                         |      | SIFt based clustering |
|---------------|----------------------|----------------------------------|------|-----------------------|-------------------------------------------------|------|-----------------------|
| Cmpd. variant | Tautomer probability | XP gscore kcal mol <sup>-1</sup> | Rank | Binding pose          | $\Delta G_{\text{bind}}$ kcal mol <sup>-1</sup> | Rank | Binding pose          |
| 7.2           | 0.573                | -7.880                           | 1    | L3-L5-L7              | -62.41                                          | 3    | L3-L5-L7              |
| 7.2           | 0.573                | -7.758                           | 2    | L3-L5-L7              | -71.28                                          | 1    | L3-L5-L7              |
| 7.2           | 0.573                | -7.297                           | 3    | L3-L5-L7              | -58.48                                          | 6    | L3-L5-L7              |
| 7.2           | 0.573                | -6.404                           | 4    | L3-L5-L7              | -62.24                                          | 4    | L3-L5-L7              |
| 7.2           | 0.573                | -6.397                           | 5    | L3-L5-L7              | -41.96                                          | 13   |                       |
| 7.2           | 0.573                | -6.200                           | 6    | L7(Trp83)             | -54.72                                          | 9    | L7(Trp83)             |
| 7.2           | 0.573                | -6.195                           | 7    | L3-L5-L7              | -64.07                                          | 2    | L3-L5-L7              |
| 7.3           | 1                    | -6.066                           | 8    | L3-L5-L7              | -51.26                                          | 11   |                       |
| 7.2           | 0.573                | -5.928                           | 9    | L3-L5-L7              | -60.57                                          | 5    | L3-L5-L7              |
| 7.3           | 1                    | -5.864                           | 10   | L3-L5-L7              | -49.33                                          | 12   |                       |
| 7.2           | 0.573                | -4.754                           | 11   |                       | -56.59                                          | 7    | L7(Trp83)             |
| 7.2           | 0.573                | -4.255                           | 12   |                       | -53.25                                          | 10   | L7(Trp83)             |
| 7.2           | 0.573                | -4.154                           | 13   |                       | -56.42                                          | 8    | L7(Trp83)             |

| 8             |                      | XP docking                       |      | SIFt based clustering | MM-GBSA                                         |      | SIFt based clustering |
|---------------|----------------------|----------------------------------|------|-----------------------|-------------------------------------------------|------|-----------------------|
| Cmpd. variant | Tautomer probability | XP gscore kcal mol <sup>-1</sup> | Rank | Binding pose          | $\Delta G_{\text{bind}}$ kcal mol <sup>-1</sup> | Rank | Binding pose          |
| 8.3           | 1                    | -7.773                           | 1    | L10-L12               | -39.51                                          | 14   |                       |
| 8.2           | 0.573                | -7.756                           | 2    | L10-L12               | -40.03                                          | 13   |                       |
| 8.3           | 1                    | -7.598                           | 3    | L7(Trp83)             | -38.89                                          | 15   |                       |
| 8.2           | 0.573                | -7.542                           | 4    | L3-L5-L7              | -47.03                                          | 7    | L3-L5-L7              |
| 8.3           | 1                    | -7.409                           | 5    | L3-L5-L7              | -31.63                                          | 18   |                       |
| 8.3           | 1                    | -6.862                           | 6    | L3-L10                | -45.97                                          | 9    | L3-L10                |
| 8.3           | 1                    | -5.833                           | 7    | L7(Trp83)             | -36.59                                          | 17   |                       |
| 8.2           | 0.573                | -5.750                           | 8    | L3-L5-L7              | -53.86                                          | 5    | L3-L5-L7              |
| 8.3           | 1                    | -5.708                           | 9    | L3-L5-L7              | -56.40                                          | 4    | L3-L5-L7              |
| 8.3           | 1                    | -4.443                           | 10   | L3-L5-L7              | -44.56                                          | 10   | L3-L5-L7              |
| 8.3           | 1                    | -4.195                           | 11   |                       | -36.73                                          | 16   |                       |
| 8.1           | 0.427                | -4.182                           | 12   |                       | -41.46                                          | 12   |                       |
| 8.3           | 1                    | -4.179                           | 13   |                       | -42.13                                          | 11   |                       |
| 8.1           | 0.427                | -3.922                           | 14   |                       | -47.06                                          | 6    | —                     |
| 8.2           | 0.573                | -3.891                           | 15   |                       | -46.38                                          | 8    | L10-L12               |
| 8.1           | 0.427                | -3.365                           | 16   |                       | -61.71                                          | 3    | L7(Trp83)             |
| 8.1           | 0.427                | -3.341                           | 17   |                       | -67.41                                          | 1    | L7(Trp83)             |
| 8.2           | 0.427                | -2.377                           | 18   |                       | -66.65                                          | 2    | L7(Trp83)             |

| 9             |                      | XP docking                       |      | SIFt based clustering | MM-GBSA                                         |      | SIFt based clustering |
|---------------|----------------------|----------------------------------|------|-----------------------|-------------------------------------------------|------|-----------------------|
| Cmpd. variant | Tautomer probability | XP gscore kcal mol <sup>-1</sup> | Rank | Binding pose          | $\Delta G_{\text{bind}}$ kcal mol <sup>-1</sup> | Rank | Binding pose          |
| 9.2           | 0.573                | -8.415                           | 1    | L3-L5-L7              | -64.89                                          | 3    | L3-L5-L7              |
| 9.1           | 0.427                | -7.541                           | 2    | L3-L5-L7              | -80.36                                          | 1    | L3-L5-L7              |
| 9.3           | 1                    | -7.235                           | 3    | L3-L5-L7              | -21.91                                          | 9    | L3-L5-L7              |
| 9.1           | 0.427                | -6.527                           | 4    | L7(Trp83)             | -65.64                                          | 2    | L7(Trp83)             |
| 9.1           | 0.427                | -6.258                           | 5    | L7(Trp83)             | -56.46                                          | 4    | L7(Trp83)             |
| 9.3           | 1                    | -5.748                           | 6    | L3-L5-L7              | -40.03                                          | 8    | L3-L5-L7              |
| 9.3           | 1                    | -5.621                           | 7    | L7(Trp83)             | -44.41                                          | 6    | L7(Trp83)             |
| 9.3           | 1                    | -5.345                           | 8    | L10-L12               | -2.11                                           | 11   |                       |
| 9.2           | 0.573                | -4.841                           | 9    | —                     | -44.00                                          | 7    | L10(174Ile)           |
| 9.1           | 0.427                | -4.765                           | 10   | L3-L5-L7              | -54.90                                          | 5    | L3-L5-L7              |
| 9.3           | 1                    | -4.060                           | 11   |                       | -16.26                                          | 10   |                       |

| 10            |                      | XP docking                       |      | SIFt based clustering | MM-GBSA                                         |      | SIFt based clustering |
|---------------|----------------------|----------------------------------|------|-----------------------|-------------------------------------------------|------|-----------------------|
| Cmpd. variant | Tautomer probability | XP gscore kcal mol <sup>-1</sup> | Rank | Binding pose          | $\Delta G_{\text{bind}}$ kcal mol <sup>-1</sup> | Rank | Binding pose          |
| 10.2          | 0.573                | -8.253                           | 1    | L3-L5-L7              | -56.09                                          | 9    | L3-L5-L7              |
| 10.2          | 0.573                | -7.989                           | 2    | L3-L5-L7              | -73.11                                          | 4    | L3-L5-L7              |
| 10.1          | 0.427                | -7.960                           | 3    | L7(Trp83)             | -66.15                                          | 7    | L7(Trp83)             |
| 10.2          | 0.573                | -7.917                           | 4    | L3-L5-L7              | -55.85                                          | 10   | L3-L5-L7              |
| 10.1          | 0.427                | -7.868                           | 5    | L3-L10                | -76.28                                          | 3    | L3-L10                |
| 10.1          | 0.427                | -7.845                           | 6    | L3-L10                | -71.78                                          | 5    | L3-L10                |
| 10.1          | 0.427                | -7.844                           | 7    | L3-L5-L7              | -77.18                                          | 2    | L3-L5-L7              |
| 10.1          | 0.427                | -7.749                           | 8    | L3-L5-L7              | -68.09                                          | 6    | L3-L5-L7              |
| 10.1          | 0.427                | -7.474                           | 9    | L3-L10                | -80.57                                          | 1    | L3-L10                |
| 10.3          | 1                    | -7.428                           | 10   | L3-L10                | -47.66                                          | 13   |                       |
| 10.2          | 0.573                | -7.236                           | 11   |                       | -58.16                                          | 8    | L3-L5-L7              |
| 10.3          | 1                    | -7.050                           | 12   |                       | -35.92                                          | 19   |                       |
| 10.3          | 1                    | -6.920                           | 13   |                       | -48.41                                          | 11   |                       |
| 10.3          | 1                    | -6.510                           | 14   |                       | -32.99                                          | 21   |                       |
| 10.3          | 1                    | -6.272                           | 15   |                       | -37.76                                          | 17   |                       |
| 10.3          | 1                    | -6.244                           | 16   |                       | -47.33                                          | 14   |                       |
| 10.3          | 1                    | -6.064                           | 17   |                       | -48.04                                          | 12   |                       |
| 10.3          | 1                    | -5.834                           | 18   |                       | -39.61                                          | 16   |                       |
| 10.3          | 1                    | -5.361                           | 19   |                       | -36.06                                          | 18   |                       |
| 10.3          | 1                    | -5.223                           | 20   |                       | -33.80                                          | 20   |                       |
| 10.3          | 1                    | -5.040                           | 21   |                       | -41.38                                          | 15   |                       |

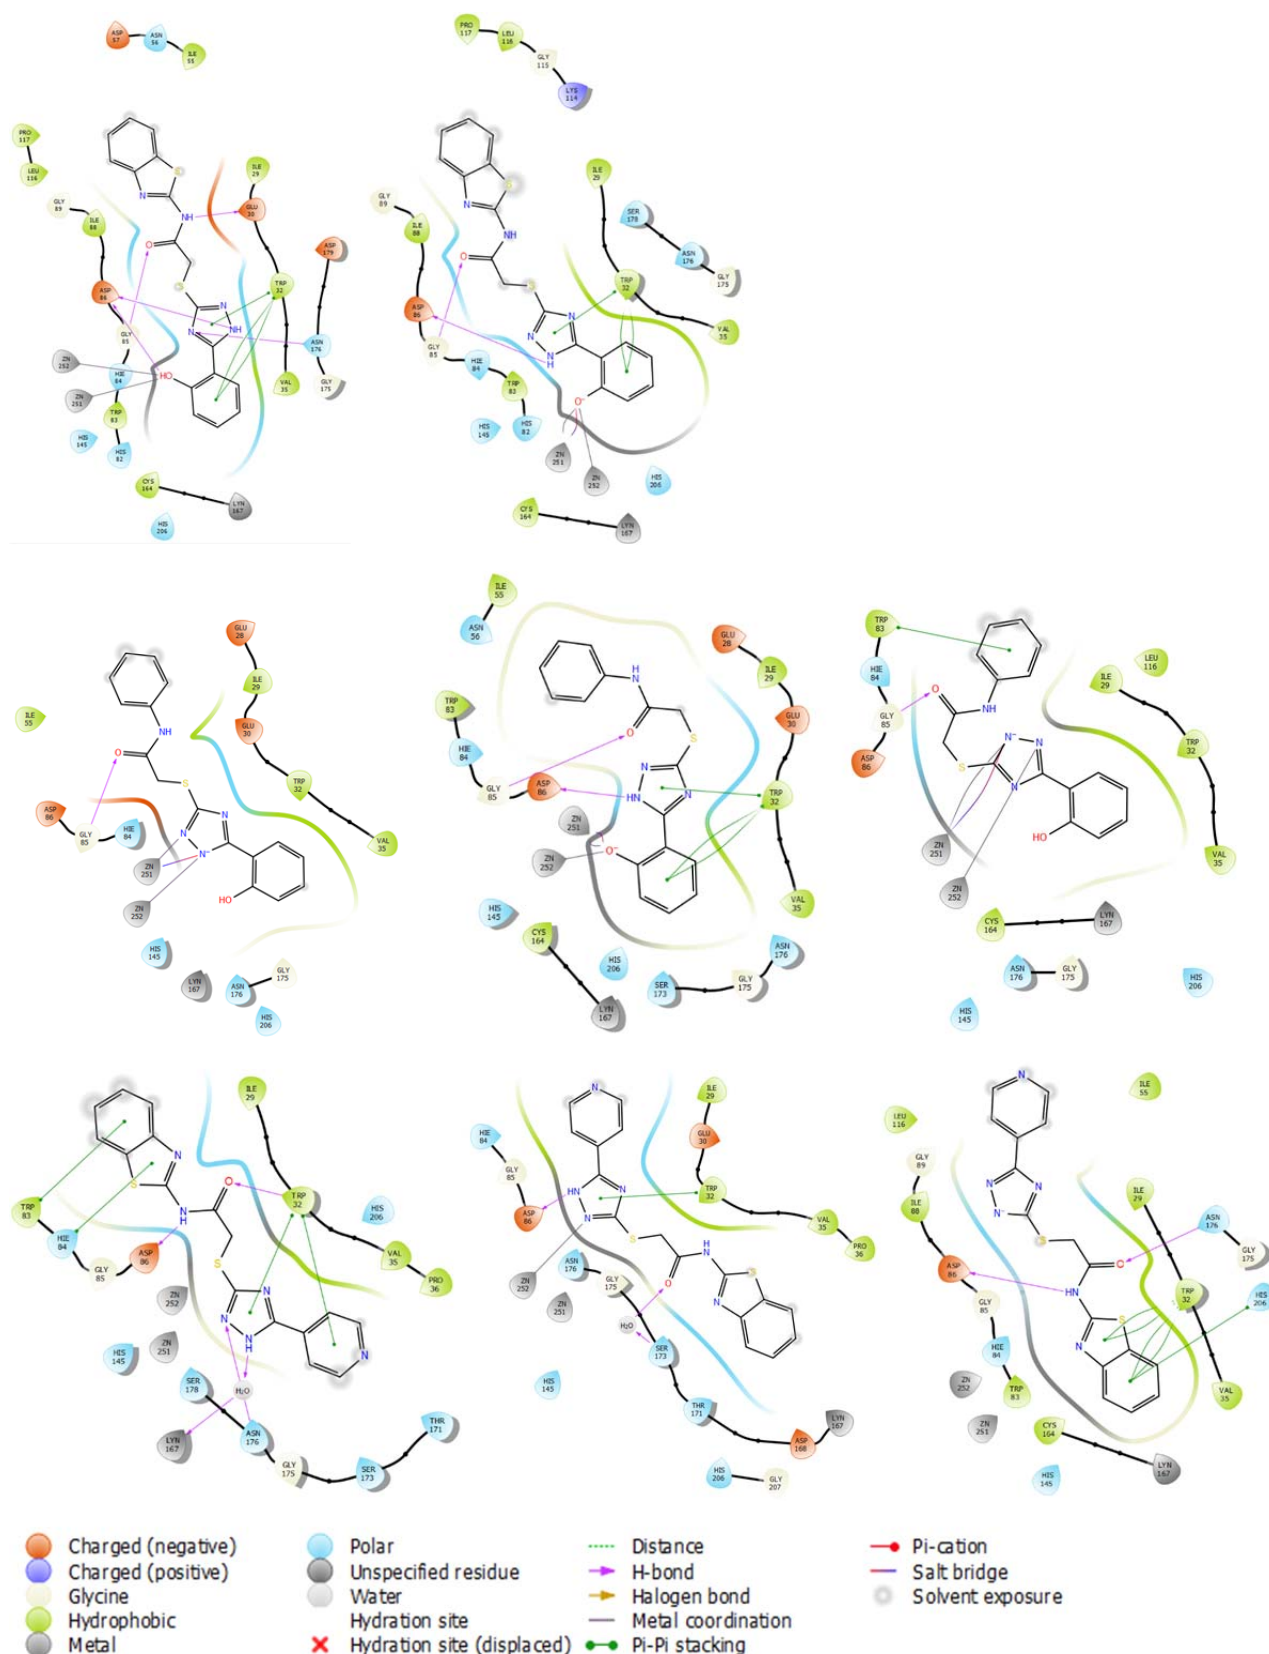

**Figure S22.** Ligand interaction diagrams for relevant poses (MM-GBSA, PDB 1A8T<sup>2</sup>) of **1** (top), **2** (middle) and **3** (bottom). For **1**, top scoring L3-L5-L7 poses of the phenol (left) and phenolate (right) forms are shown. For **2**, the top scoring L3-L5-L7 poses of the phenol (left) and phenolate (middle) forms, as well as the L7(Trp83) pose ranked as number 6 (in which the triazole coordinate the zinc ions) are shown. For **3**, the top scoring L7(Trp83) (left) and L10L12 poses (middle) are shown, as well as the minor L3-L5-L7 pose ranked as number 11 that is discussed in the paper (right).

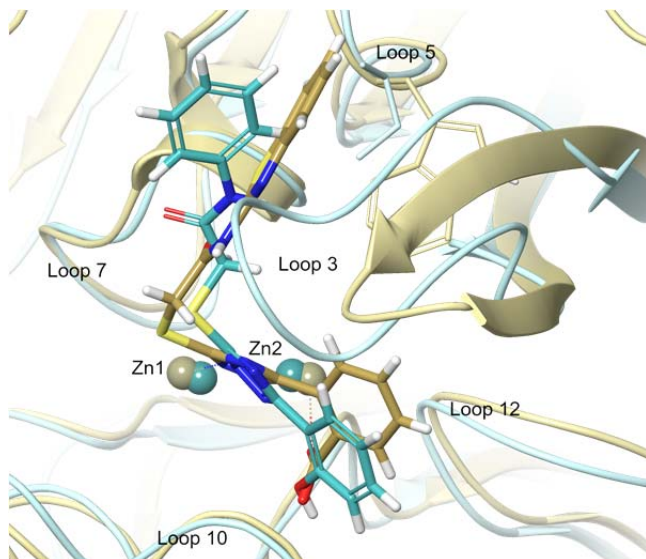

**Figure S23.** The top ranked pose (MM-GBSA) from the docking of **2** (turquoise) into the active site of CcrA (PDB 1A8T<sup>2</sup>) (for interaction diagram see Figure S22) superimposed with the crystal structure of **4** (light brown) in complex with VIM-2 (PDB 5LSC<sup>31</sup>). The triazole moiety is negatively charged in both **2** and **4**. The larger angles between the triazole nitrogens and the zinc ions in CcrA is a result of the shorter distance between the two zinc ions in CcrA compared to VIM-2 (2.84 Å versus 3.88 Å).

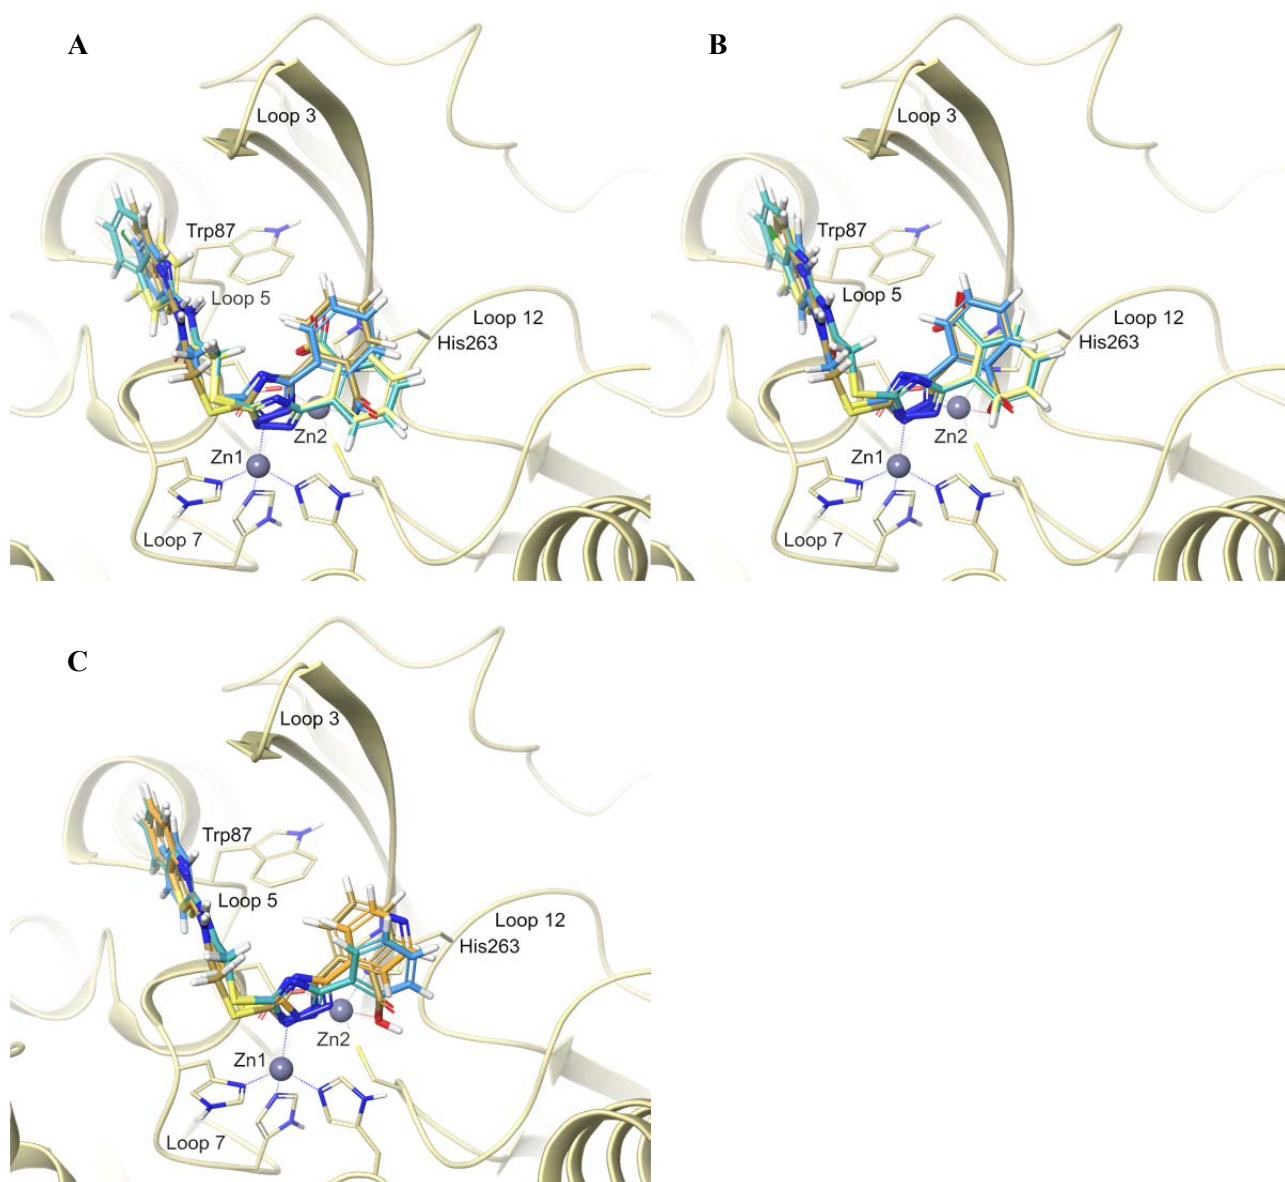

**Figure S24.** Poses from docking in the active site of VIM-2 (PDB 5LSC<sup>31</sup>). A) MM-GBSA poses for **4** (turquoise), **5** (blue) and **6** (yellow); B) glide poses for **4** (turquoise), **5** (blue) and **6** (yellow); and C) MM-GBSA poses for **1** (turquoise), **2** (blue) and **3** (orange) showing the smallest RMSD to the native ligand (**4**). Four such L3-L5-L7 type poses were received for **2** (see Figure S22 and Figure S23) upon docking into the active site of CcrA (PDB 1A8T<sup>2</sup>), but none for **1** or **3–6** (see Figure S21). One likely reason for these differences is the shorter distance between the zinc ions in CcrA (2.84 Å versus 3.88 Å).<sup>32</sup>

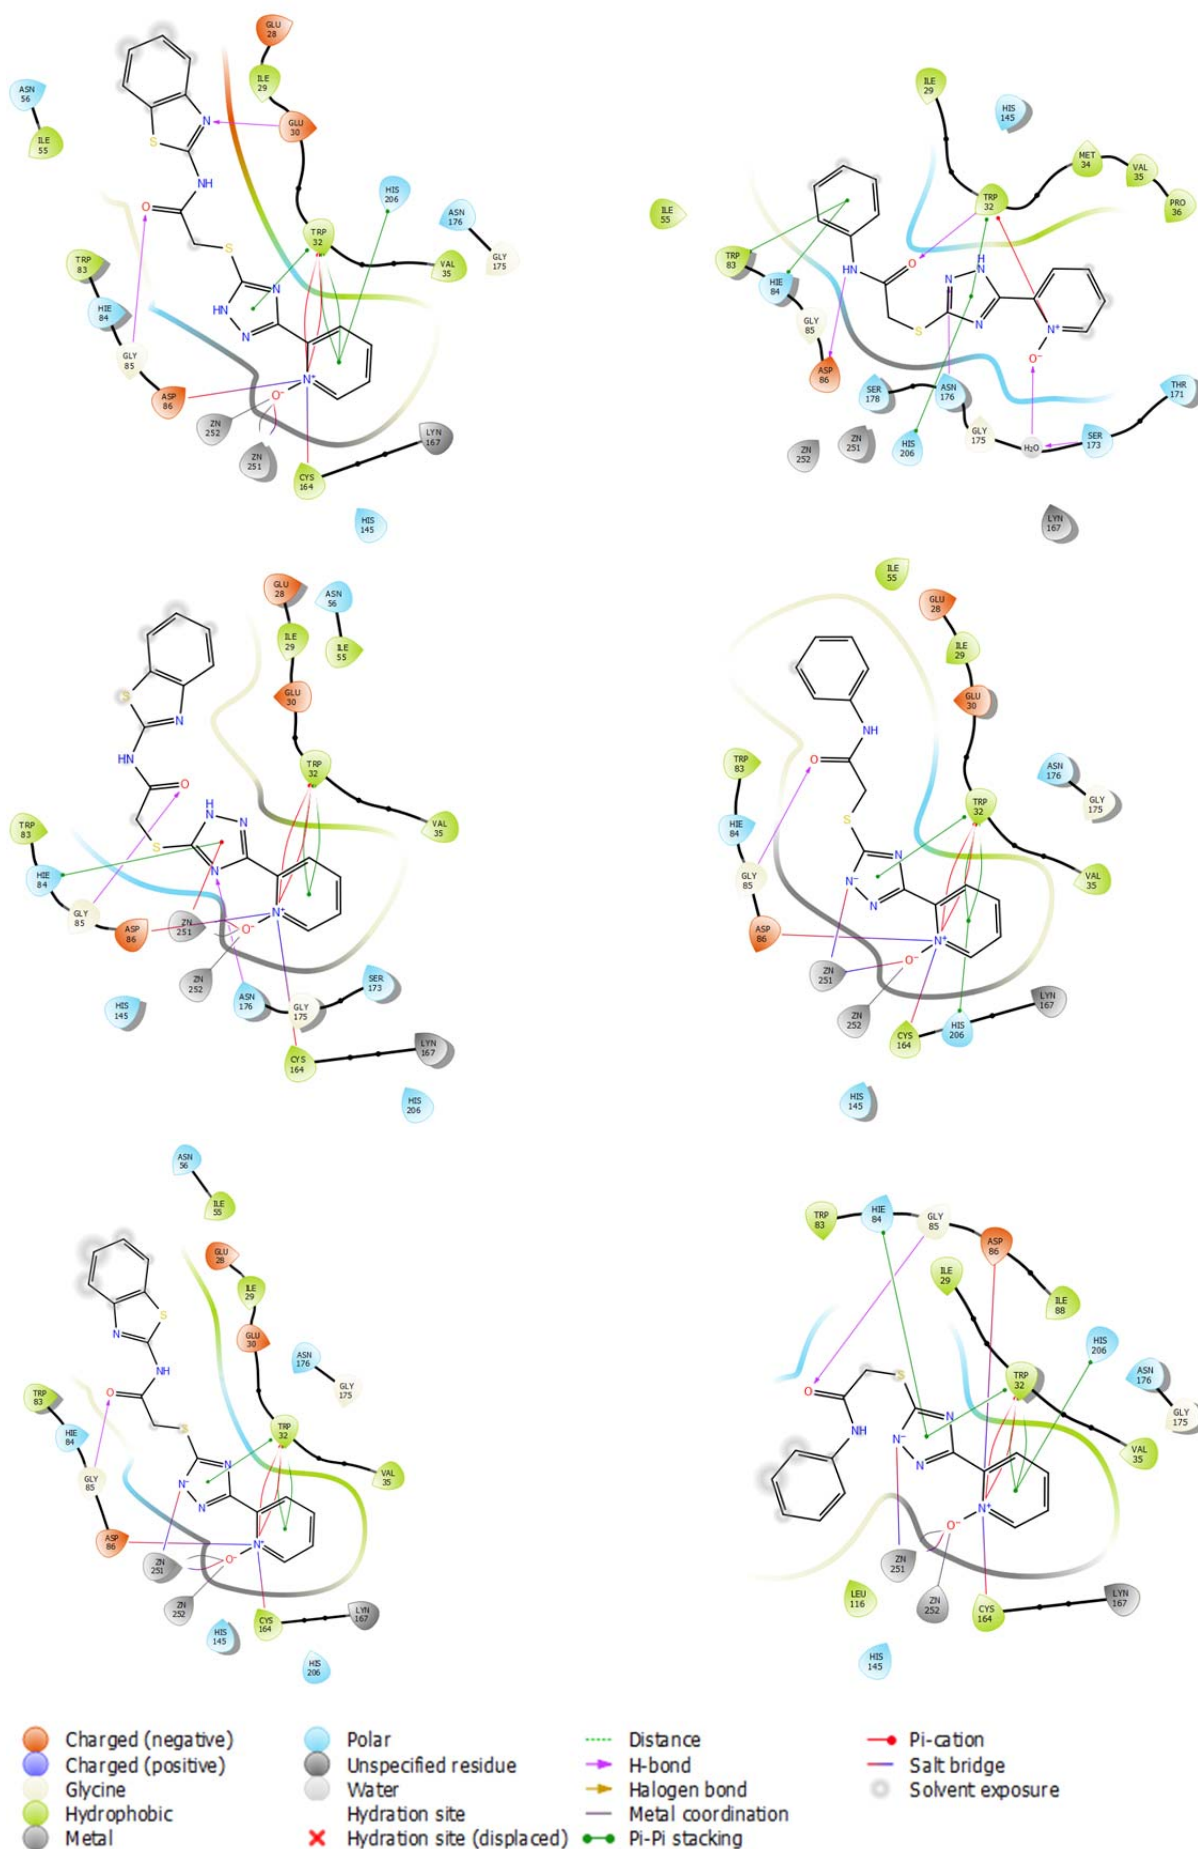

**Figure S25.** Ligand interaction diagrams for the L3-L5-L7 poses (MM-GBSA, PDB 1A8T<sup>2</sup>) of **7** (left) ranked as number 2 (top), 4 (middle) and 11 (bottom), and for the L3-L5-L7 poses of **8** (right) ranked as number 1 (top), 4 (middle) and 10 (bottom). The poses are shown in Figure S27 as well.

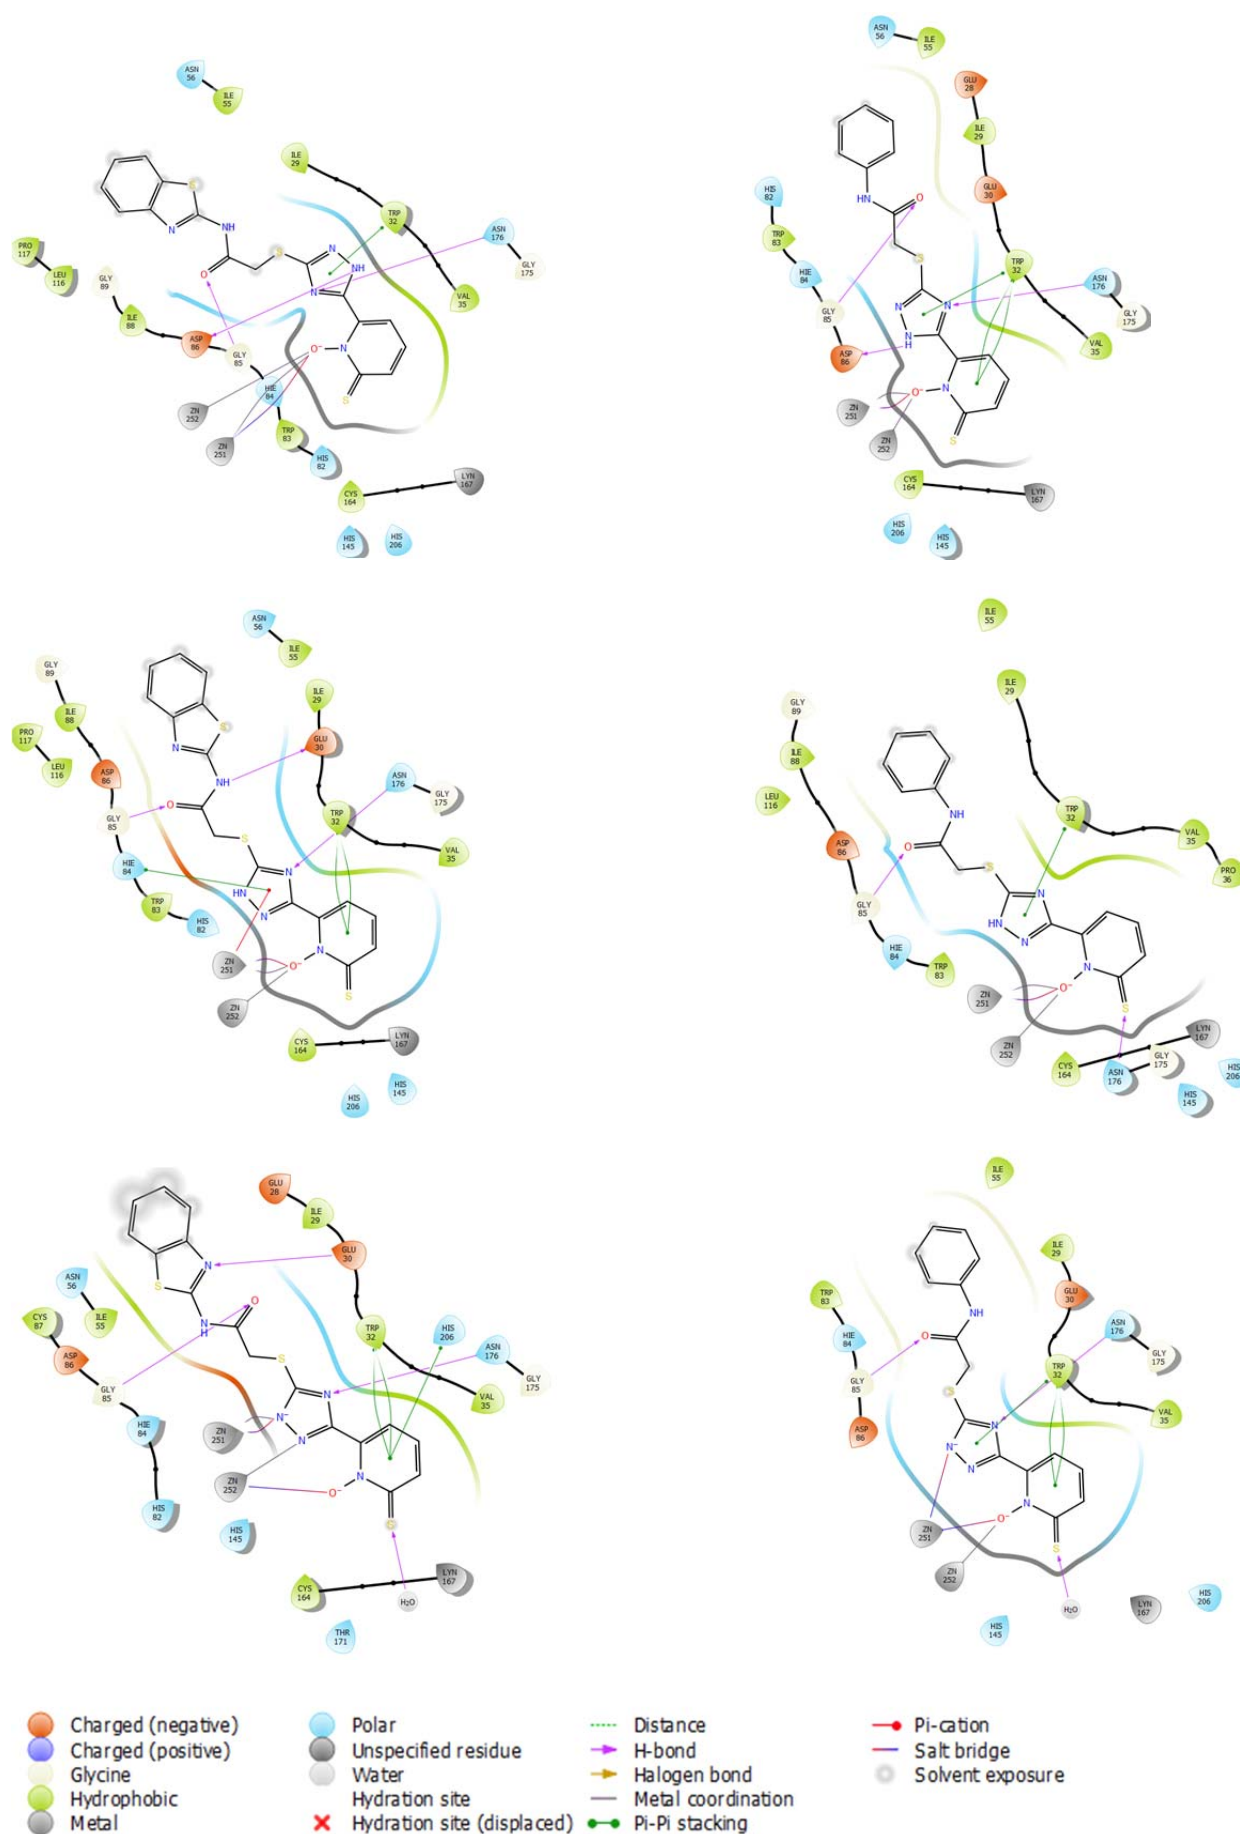

**Figure S26.** Ligand interaction diagrams for the L3-L5-L7 poses (MM-GBSA, PDB 1A8T<sup>2</sup>) of **9** (left) ranked as number 1 (top), 3 (middle) and 8 (bottom), and for the L3-L5-L7 poses of **10** (right) ranked as number 2 (top), 8 (middle) and 11 (bottom). The poses are shown in Figure S27 as well.

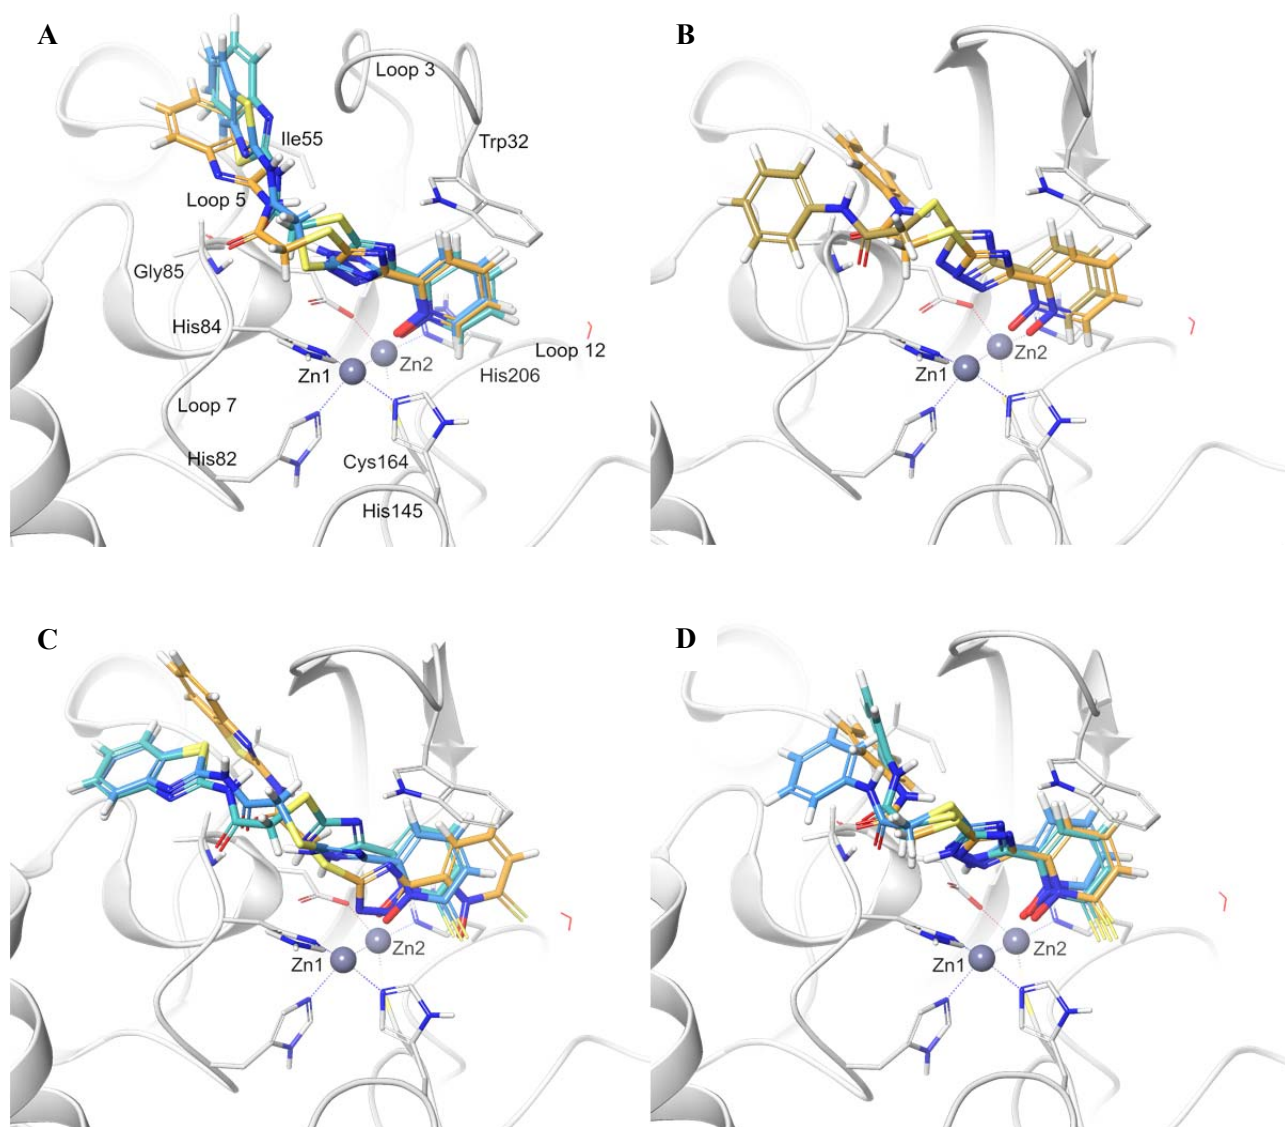

**Figure S27.** Relevant poses (MM-GBSA) from the docking of **7–10** into the active site of CcrA (PDB 1A8T<sup>2</sup>). A) the poses ranked as number 2 (turquoise), 4 (blue) and 11 (orange) for **7**; B) the poses ranked as number 4 (orange) and 10 (light brown) for **8**; C) the poses ranked as number 1 (turquoise), 3 (blue) and 8 (orange) for **9**; and D) the poses ranked as number 2 (turquoise), 8 (blue) and 11 (orange) for **10**. For interaction diagrams see Figure S25 and Figure S26.

**Table S14.** A summary of the results from the molecular docking, MM-GBSA rescoring and SIFt based analysis and clustering of **1–10**. For **4–6**, the results of the top fifteen ranked poses were included in the clustering, while the top ten ranked poses were included for **1–3** and **7–10**.

| Compound            | Method     | Binding poses (%) |           |        |         |        |
|---------------------|------------|-------------------|-----------|--------|---------|--------|
|                     |            | L3-L5-L7          | L7(Trp83) | L3-L10 | L10-L12 | Others |
| <b>4</b>            | XP docking | 80                |           | 7      | 13      |        |
|                     | MM-GBSA    | 67                |           | 7      | 27      |        |
| <b>5</b>            | XP docking | 53                |           | 33     | 13      |        |
|                     | MM-GBSA    | 40                |           | 40     | 13      | 7      |
| <b>6</b>            | XP docking | 60                |           | 13     | 27      |        |
|                     | MM-GBSA    | 53                |           | 13     | 33      |        |
| $\Sigma_{4-6}$      | XP docking | 65                |           | 18     | 18      |        |
|                     | MM-GBSA    | 53                |           | 20     | 24      | 2      |
| <b>1 phenols</b>    | XP docking | 56                |           |        | 44      |        |
|                     | MM-GBSA    | 40                |           | 10     | 50      |        |
| <b>1 phenolates</b> | XP docking | 60                |           | 10     | 30      |        |
|                     | MM-GBSA    | 20                |           |        | 80      |        |
| <b>2 phenols</b>    | XP docking | 80                | 20        |        |         |        |
|                     | MM-GBSA    | 40                | 20        | 20     | 20      |        |
| <b>2 phenolates</b> | XP docking | 50                |           | 10     | 40      |        |
|                     | MM-GBSA    | 20                | 10        | 30     | 40      |        |
| <b>3</b>            | XP docking |                   | 44        |        | 44      | 11     |
|                     | MM-GBSA    |                   | 40        |        | 60      |        |
| <b>7</b>            | XP docking | 90                | 10        |        |         |        |
|                     | MM-GBSA    | 60                | 40        |        |         |        |
| <b>8</b>            | XP docking | 50                | 20        | 10     | 20      |        |
|                     | MM-GBSA    | 40                | 30        | 10     | 10      | 10     |
| <b>9</b>            | XP docking | 50                | 30        |        | 10      | 10     |
|                     | MM-GBSA    | 50                | 38        |        |         | 13     |
| <b>10</b>           | XP docking | 50                | 10        | 40     |         |        |
|                     | MM-GBSA    | 60                | 10        | 30     |         |        |
| $\Sigma_{1-2}$      | XP docking | 62                | 5         | 5      | 29      | 0      |
|                     | MM-GBSA    | 30                | 8         | 15     | 48      | 0      |
| $\Sigma_{7,8}$      | XP docking | 70                | 15        | 5      | 10      | 0      |
|                     | MM-GBSA    | 50                | 35        | 5      | 5       | 5      |
| $\Sigma_{9,10}$     | XP docking | 50                | 20        | 20     | 5       | 5      |
|                     | MM-GBSA    | 55                | 24        | 15     | 0       | 6      |

**Table S15.** A summary of the data in Table S9, Table S10, Table S12 and Table S13 showing the correlation between binding pose and main *1H*-1,2,4-triazole tautomeric form (or the corresponding deprotonated form) identified for the top scoring poses of **1–10**.

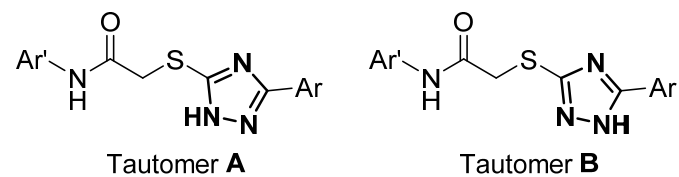

| Cmpds        | Binding pose/s | <i>1H</i> -1,2,4-triazole tautomer <sup>a</sup> |
|--------------|----------------|-------------------------------------------------|
| <b>1, 2</b>  | L3-L5-L7       | <b>B ≥ A</b>                                    |
|              | L3-L10         |                                                 |
|              | L7(Trp83)      |                                                 |
| <b>3</b>     | L10-L12        | <b>A ≥ B</b>                                    |
|              | L7(Trp83)      |                                                 |
|              | L10-L12        |                                                 |
| <b>4–6</b>   | L3-L5-L7       | <b>B ≥ A</b>                                    |
|              | L3-L10         |                                                 |
|              | L10-L12        |                                                 |
| <b>7</b>     | L3-L5-L7       | <b>B</b>                                        |
|              | L7(Trp83)      |                                                 |
| <b>9</b>     | L3-L5-L7       | <b>A &gt; B</b>                                 |
|              | L7(Trp83)      |                                                 |
| <b>8, 10</b> | L3-L5-L7       | <b>B ≥ A</b>                                    |
|              | L3-L10         |                                                 |
|              | L7(Trp83)      |                                                 |

<sup>a</sup>Or the corresponding deprotonated form.

## 4 References

- (1) Yang, S.-K.; Kang, J. S.; Oelschlaeger, P.; Yang, K.-W., Azolythioacetamide: A Highly Promising Scaffold for the Development of Metallo- $\beta$ -lactamase Inhibitors. *ACS Med. Chem. Lett.* **2015**, 6 (4), 455–460.
- (2) Toney, J. H.; Cleary, K. A.; Hammond, G. G.; Yuan, X.; May, W. J.; Hutchins, S. M.; Ashton, W. T.; Vanderwall, D. E., Structure-activity relationships of biphenyl tetrazoles as metallo- $\beta$ -lactamase inhibitors. *Bioorg. Med. Chem. Lett.* **1999**, 9 (18), 2741–2746.
- (3) Galleni, M.; Lamotte-Brasseur, J.; Rossolini, G. M.; Spencer, J.; Dideberg, O.; Frère, J.-M., Standard Numbering Scheme for Class B  $\beta$ -Lactamases. *Antimicrob. Agents Chemother.* **2001**, 45 (3), 660–663.
- (4) Mulder, F. A. A.; Schipper, D.; Bott, R.; Boelens, R., Altered flexibility in the substrate-binding site of related native and engineered high-alkaline *Bacillus subtilis*ins. *J. Mol. Biol.* **1999**, 292 (1), 111–123.
- (5) Williamson, M. P., Using chemical shift perturbation to characterise ligand binding. *Prog. Nucl. Magn. Reson. Spectrosc.* **2013**, 73, 1–16.
- (6) Teilum, K.; Kunze, M. B. A.; Erendsson, S.; Kragelund, B. B., (S)Pinning down protein interactions by NMR. *Protein Science* **2017**, 26 (3), 436–451.
- (7) Farmer, B. T.; Constantine, K. L.; Goldfarb, V.; Friedrichs, M. S.; Wittekind, M.; Yanchunas, J.; Robertson, J. G.; Mueller, L., Localizing the NADP<sup>+</sup> binding site on the MurB enzyme by NMR. *Nat. Struct. Biol.* **1996**, 3 (12), 995–997.
- (8) Lüttgen, H.; Robelek, R.; Mühlberger, R.; Diercks, T.; Schuster, S. C.; Köhler, P.; Kessler, H.; Bacher, A.; Richter, G., Transcriptional Regulation by Antitermination. Interaction of RNA with NusB Protein and NusB/NusE Protein Complex of *Escherichia coli*. *J. Mol. Biol.* **2002**, 316 (4), 875–885.
- (9) Fielding, L., NMR Methods for the Determination of Protein- Ligand Dissociation Constants. *Current Topics in Medicinal Chemistry* **2003**, 3 (1), 39–53.
- (10) Guimarães, C. R. W.; Cardozo, M., MM-GB/SA Rescoring of Docking Poses in Structure-Based Lead Optimization. *J. Chem. Inf. Model.* **2008**, 48 (5), 958–970.
- (11) Deng, Z.; Chuaqui, C.; Singh, J., Structural Interaction Fingerprint (SIFt): A Novel Method for Analyzing Three-Dimensional Protein–Ligand Binding Interactions. *J. Med. Chem.* **2004**, 47 (2), 337–344.
- (12) Fitzgerald, P. M. D.; Wu, J. K.; Toney, J. H., Unanticipated Inhibition of the Metallo- $\beta$ -lactamase from *Bacteroides fragilis* by 4-Morpholineethanesulfonic Acid (MES): A Crystallographic Study at 1.85-Å Resolution. *Biochemistry* **1998**, 37 (19), 6791–6800.
- (13) Toney, J. H.; Fitzgerald, P. M. D.; Grover-Sharma, N.; Olson, S. H.; May, W. J.; Sundelof, J. G.; Vanderwall, D. E.; Cleary, K. A.; Grant, S. K.; Wu, J. K.; Kozarich, J. W.; Pompliano, D. L.; Hammond, G. G., Antibiotic sensitization using biphenyl tetrazoles as potent inhibitors of *Bacteroides fragilis* metallo- $\beta$ -lactamase. *Chem. Biol.* **1998**, 5 (4), 185–196.
- (14) Greenlee, M. L.; Laub, J. B.; Balkovec, J. M.; Hammond, M. L.; Hammond, G. G.; Pompliano, D. L.; Epstein-Toney, J. H., Synthesis and SAR of thioester and thiol inhibitors of IMP-1 Metallo- $\beta$ -Lactamase. *Bioorg. Med. Chem. Lett.* **1999**, 9 (17), 2549–2554.
- (15) Nagano, R.; Adachi, Y.; Imamura, H.; Yamada, K.; Hashizume, T.; Morishima, H., Carbapenem Derivatives as Potential Inhibitors of Various  $\beta$ -Lactamases, Including Class B Metallo- $\beta$ -Lactamases. *Antimicrob. Agents Chemother.* **1999**, 43 (10), 2497–2503.
- (16) Scrofani, S. D. B.; Chung, J.; Huntley, J. J. A.; Benkovic, S. J.; Wright, P. E.; Dyson, H. J., NMR Characterization of the Metallo- $\beta$ -lactamase from *Bacteroides fragilis* and Its Interaction with a Tight-Binding Inhibitor: Role of an Active-Site Loop. *Biochemistry* **1999**, 38 (44), 14507–14514.
- (17) Green, B. G.; Toney, J. H.; Kozarich, J. W.; Grant, S. K., Inhibition of Bacterial Peptide Deformylase by Biaryl Acid Analogs. *Arch. Biochem. Biophys.* **2000**, 375 (2), 355–358.
- (18) Payne, D. J.; Du, W.; Bateson, J. H.,  $\beta$ -Lactamase epidemiology and the utility of established and novel beta-lactamase inhibitors. *Expert Opin. Investig. Drugs* **2000**, 9 (2), 247–261.
- (19) Sandanayaka, V. P.; Feigelson, G. B.; Prashad, A. S.; Yang, Y.; Petersen, P. J., Allyl and propargyl substituted penam sulfones as versatile intermediates toward the syntheses of new  $\beta$ -lactamase inhibitors. *Bioorg. Med. Chem. Lett.* **2001**, 11 (8), 997–1000.
- (20) Payne, D. J.; Hueso-Rodríguez, J. A.; Boyd, H.; Concha, N. O.; Janson, C. A.; Gilpin, M.; Bateson, J. H.; Cheever, C.; Niconovich, N. L.; Pearson, S.; Rittenhouse, S.; Tew, D.; Díez, E.; Pérez, P.; de la Fuente, J.; Rees, M.; Rivera-Sagredo, A., Identification of a Series of Tricyclic Natural Products as Potent Broad-Spectrum Inhibitors of Metallo- $\beta$ -Lactamases. *Antimicrob. Agents Chemother.* **2002**, 46 (6), 1880–1886.
- (21) Boerzel, H.; Koeckert, M.; Bu, W.; Spingler, B.; Lippard, S. J., Zinc-Bound Thiolate–Disulfide Exchange: A Strategy for Inhibiting Metallo- $\beta$ -lactamases. *Inorg. Chem.* **2003**, 42 (5), 1604–1615.
- (22) Siemann, S.; Clarke, A. J.; Viswanatha, T.; Dmitrienko, G. I., Thiols as Classical and Slow-Binding Inhibitors of IMP-1 and Other Binuclear Metallo- $\beta$ -lactamases. *Biochemistry* **2003**, 42 (6), 1673–1683.

- (23) Tabei, K.; Feng, X.; Venkatesan, A. M.; Abe, T.; Hideki, U.; Mansour, T. S.; Siegel, M. M., Mechanism of Inactivation of  $\beta$ -Lactamases by Novel 6-Methylidene Penems Elucidated Using Electrospray Ionization Mass Spectrometry. *J. Med. Chem.* **2004**, 47 (14), 3674–3688.
- (24) Venkatesan, A. M.; Agarwal, A.; Abe, T.; Ushiroguchi, H.; Yamamura, I.; Kumagai, T.; Petersen, P. J.; Weiss, W. J.; Lenoy, E.; Yang, Y.; Shlaes, D. M.; Ryan, J. L.; Mansour, T. S., Novel imidazole substituted 6-methylidene-penems as broad-spectrum  $\beta$ -lactamase inhibitors. *Bioorg. Med. Chem.* **2004**, 12 (22), 5807–5817.
- (25) Venkatesan, A. M.; Gu, Y.; Santos, O. D.; Abe, T.; Agarwal, A.; Yang, Y.; Petersen, P. J.; Weiss, W. J.; Mansour, T. S.; Nukaga, M.; Hujer, A. M.; Bonomo, R. A.; Knox, J. R., Structure–Activity Relationship of 6-Methylidene Penems Bearing Tricyclic Heterocycles as Broad-Spectrum  $\beta$ -Lactamase Inhibitors: Crystallographic Structures Show Unexpected Binding of 1,4-Thiazepine Intermediates. *J. Med. Chem.* **2004**, 47 (26), 6556–6568.
- (26) Irwin, J. J.; Raushel, F. M.; Shoichet, B. K., Virtual Screening against Metalloenzymes for Inhibitors and Substrates. *Biochemistry* **2005**, 44 (37), 12316–12328.
- (27) Venkatesan, A. M.; Agarwal, A.; Abe, T.; Ushiroguchi, H.; Yamamura, I.; Ado, M.; Tsuyoshi, T.; Dos Santos, O.; Gu, Y.; Sum, F.-W.; Li, Z.; Francisco, G.; Lin, Y.-I.; Petersen, P. J.; Yang, Y.; Kumagai, T.; Weiss, W. J.; Shlaes, D. M.; Knox, J. R.; Mansour, T. S., Structure-Activity Relationship of 6-Methylidene Penems Bearing 6,5 Bicyclic Heterocycles as Broad-Spectrum  $\beta$ -Lactamase Inhibitors: Evidence for 1,4-Thiazepine Intermediates with C7 R Stereochemistry by Computational Methods. *J. Med. Chem.* **2006**, 49 (15), 4623–4637.
- (28) Roll, D. M.; Yang, Y.; Wildey, M. J.; Bush, K.; Lee, M. D., Inhibition of metallo- $\beta$ -lactamases by pyridine monothiocarboxylic acid analogs. *J. Antibiot.* **2010**, 63, 255–257.
- (29) Shi, P.; Zhang, Y.; Li, Y.; Bian, L., Probing the interaction of L-captopril with metallo- $\beta$ -lactamase CcrA by fluorescence spectra and molecular dynamic simulation. *Luminescence* **2018**, 33 (5), 954–961.
- (30) Minkin, V. I.; Garnovskii, A. D.; Elguero, J.; Katritzky, A. R.; Denisko, O. V., The Tautomerism of Heterocycles: Five-membered Rings with Two or More Heteroatoms. In *Advances in Heterocyclic Chemistry*, Katritzky, A. R., Ed. Academic Press: 2000; Vol. 76, pp 157–323.
- (31) Christopeit, T.; Yang, K.-W.; Yang, S.-K.; Leiros, H.-K. S., The structure of the metallo- $\beta$ -lactamase VIM-2 in complex with a triazolylthioacetamide inhibitor. *Acta Crystallogr. F* **2016**, 72 (11), 813–819.
- (32) Rivière, G.; Oueslati, S.; Gayral, M.; Créchet, J.-B.; Nhiri, N.; Jacquet, E.; Cintrat, J.-C.; Giraud, F.; van Heijenoort, C.; Lescop, E.; Pethe, S.; Iorga, B. I.; Naas, T.; Guittet, E.; Morellet, N., NMR Characterization of the Influence of Zinc(II) Ions on the Structural and Dynamic Behavior of the New Delhi Metallo- $\beta$ -Lactamase-1 and on the Binding with Flavonols as Inhibitors. *ACS Omega* **2020**, 5 (18), 10466–10480.
